# Supplementary material for: Cell-type- and chromosome-specific chromatin landscapes and DNA replication programs of Drosophila testis tumor stem cell–like cells
Source: Genome Res. 2026 Jan;36(1):83–101. doi: 10.1101/gr.280809.125 (PMC12758400; doi:10.1101/gr.280809.125)
Supplement: Supplement 1 [file Supplemental_Table_S1.xlsx]

## Sheet: Legend
Quantification Results (scRNA-seq)
	symbol	FlyBase current symbol (as of release r6.47) of every gene present in the dataset.
	flybase	FBgn# ID of the gene.
	GSC_CPM	Counts per million of transcript abundance in the GSC-like cluster.
	CySC_CPM	Counts per million of transcript abundance in the CySC-like cluster.
	Cyte_CPM	Counts per million of transcript abundance in the spermatocyte cluster.
	Soma_CPM	Counts per million of transcript abundance in the somatic cell cluster.
	Muscle_CPM	Counts per million of transcript abundance in the muscle cell cluster.
	GSC_log10CPM	Log10 transform of the above values.
	CySC_log10CPM
	Cyte_log10CPM
	Soma_log10CPM
	Muscle_log10CPM
Classification Results (scRNA-seq)
	symbol	FlyBase current symbol (as of release r6.47) of every gene present in the dataset.
	flybase	FBgn# ID of the gene.
	chrom	dm6 reference sequence.
	GSC_Class	Discretized CPM quantification value for the GSC-like cell type.
	CySC_Class	Discretized CPM quantification value for the CySC-like cell type.

## Sheet: Quantification_Results
		DecontX abundance (on response scale)					Method: decontX, log, and Limma regression coefficients
symbol	flybase	GSC_CPM	CySC_CPM	Cyte_CPM	Soma_CPM	Muscle_CPM	GSC_log10CPM	CySC_log10CPM	Cyte_log10CPM	Soma_log10CPM	Muscle_log10CPM
H3-GFP		229.861	332.322	15.8835	68.1639	76.9047	2.36147	2.52156	1.20095	1.83355	1.88595
lncRNA:CR40469	FBgn0058469	2.36698	5.02759	5.20498	5.02239	9.15464	0.374194	0.70136	0.716419	0.70091	0.961641
CG17636	FBgn0025837	1.01387	0.2407	15.8071	7.00791e-09	0.760365	0.00598092	-0.618523	1.19885	-8.15441	-0.118978
RhoGAP1A	FBgn0025836	25.2285	46.2447	7.86763	29.5855	21.4324	1.40189	1.66506	0.895844	1.47108	1.33107
mir-4915	FBgn0263567	0	0	0	0	0
tyn	FBgn0284435	6.39038	6.24126	2.00448	6.25132	3.50574	0.805526	0.795272	0.302001	0.795972	0.54478
lncRNA:CR45473	FBgn0267029	2.12601	20.2663	0.00076324	13.7444	13.5385	0.327564	1.30678	-3.11734	1.13813	1.13157
CG17707	FBgn0025835	0.508419	0.643496	1.42643e-07	1.14301	1.9588e-07	-0.293779	-0.191454	-6.84575	0.0580512	-6.70801
lncRNA:CR43863	FBgn0264445	1.0299	0.165629	17.4709	0.489257	1.22044e-07	0.0127961	-0.780864	1.24231	-0.310463	-6.91348
CG3038	FBgn0040373	6.21798	24.2586	4.28831	10.7878	23.156	0.793649	1.38487	0.632286	1.03293	1.36466
G9a	FBgn0040372	148.087	95.3663	50.371	68.1259	81.034	2.17052	1.97939	1.70218	1.83331	1.90867
CG42376	FBgn0259722	36.9869	60.2924	22.2469	56.725	38.6558	1.56805	1.78026	1.34727	1.75377	1.58721
cin	FBgn0000316	18.6611	28.9384	7.9161	22.2975	6.67307	1.27094	1.46147	0.898511	1.34826	0.824326
CG13377	FBgn0261446	0.938754	1.25847	0.187099	71.9939	3.15284	-0.0274483	0.0998432	-0.727929	1.8573	0.498702
asRNA:CR43906	FBgn0264507	5.11461	9.44069	0.736094	42.6994	5.55454e-07	0.708812	0.975004	-0.133067	1.63042	-6.25535
CG13376	FBgn0029518	0.000176358	0.0125654	1.75955	10.5995	0	-3.75361	-1.90082	0.245401	1.02529
ewg	FBgn0005427	39.4597	94.7121	19.0327	57.005	51.8307	1.59615	1.97641	1.2795	1.75591	1.71459
CG3777	FBgn0024989	1.80113	0.417845	0.68291	2.23357e-08	3.6517e-08	0.255545	-0.378985	-0.165637	-7.651	-7.43751
mir-980	FBgn0262266	0	0	0	0	0
CG13375	FBgn0040370	18.3011	0.340968	12.8234	1.43778	1.34708e-06	1.26248	-0.467286	1.108	0.157693	-5.87061
CG12470	FBgn0040371	5.05798	6.02255	404.968	16.4661	7.70014	0.703977	0.77978	2.60742	1.21659	0.886499
Or1a	FBgn0029521	0.130558	0	0	0	0	-0.884198
CG32816	FBgn0052816	15.4342	3.14854e-11	4.65161	1.03336e-06	4.626e-10	1.18848	-10.5019	0.667603	-5.98575	-9.33479
CG43181	FBgn0262810	0	0	0	0	0
CG43182	FBgn0262811	0.102307	0	0	0	0	-0.990097
y	FBgn0004034	1.81403	3.11465e-08	9.70537e-09	2.18795e-08	2.86924e-08	0.258644	-7.50659	-8.01299	-7.65996	-7.54223
lncRNA:yar	FBgn0266568	0.296986	1.23849	1.5471	2.69758	5.92964	-0.527264	0.0928926	0.189518	0.430974	0.773029
ac	FBgn0000022	0.261675	1.08014e-08	0	0	0	-0.582238	-7.96652
lncRNA:CR44751	FBgn0265964	1.50091	1.54549	35.9266	2.67516e-07	2.04128e-07	0.176355	0.189065	1.55542	-6.57265	-6.6901
lncRNA:CR44752	FBgn0265965	4.16377	0.176616	5.23513	1.07586e-07	1.20123e-07	0.619487	-0.75297	0.718928	-6.96824	-6.92037
lncRNA:CR44753	FBgn0265966	5.5511	0.111722	5.25274e-08	5.46701e-09	1.06447e-08	0.744379	-0.951863	-7.27961	-8.26225	-7.97287
sc	FBgn0004170	0.355477	0	0	0	4.74913	-0.449188				0.676614
l(1)sc	FBgn0002561	0.133682	0	0	0	0	-0.873926
Pgcl	FBgn0011822	1.21085	1.7304e-12	3.27761	0	0	0.083092	-11.7619	0.515557
ase	FBgn0000137	0.903274	2.35271e-14	1.97087	0	0	-0.0441806	-13.6284	0.294658
Cyp4g1	FBgn0010019	7.20469	0.0755468	2.29575	1.01978e-08	1.22113e-08	0.857615	-1.12178	0.360924	-7.99149	-7.91324
ebo	FBgn0266572	16.9992	20.6079	12.514	25.1441	0.00333517	1.23043	1.31403	1.0974	1.40044	-2.47688
CG13373	FBgn0029522	31.8473	17.7598	22.7092	9.31867	13.2606	1.50307	1.24944	1.3562	0.969354	1.12256
CG32817	FBgn0052817	11.1037	7.87462	7.6221	8.61805	5.81894	1.04547	0.89623	0.882074	0.935409	0.764844
CG3176	FBgn0029524	15.0003	15.7358	10.9314	9.81107	7.19754	1.1761	1.19689	1.03867	0.991716	0.857184
CG18273	FBgn0029525	27.1831	15.5011	13.6458	6.42287	9.40514	1.4343	1.19036	1.135	0.807729	0.973365
CG3156	FBgn0023536	9.16946	4.67809	18.2279	3.33116	7.04978	0.962344	0.670069	1.26074	0.522596	0.848175
asRNA:CR45797	FBgn0267447	1.11986	1.54499	29.8646	2.36501	3.06534e-07	0.0491643	0.188926	1.47516	0.373832	-6.51352
CG17896	FBgn0023537	11.6916	118.424	12.37	68.8983	75.4547	1.06787	2.07344	1.09237	1.83821	1.87769
CG17778	FBgn0023534	0.481392	3.40604	3.67152	19.285	36.5708	-0.317501	0.53225	0.564846	1.28522	1.56313
svr	FBgn0004648	11.9785	35.1713	4.05384	61.4888	14.8449	1.0784	1.54619	0.607866	1.7888	1.17158
asRNA:CR44891	FBgn0266196	0.227934	0.904559	0.309523	3.35932	0	-0.64219	-0.0435629	-0.509307	0.526252
asRNA:CR44892	FBgn0266197	0.173825	0.396752	1.54683	2.06476	9.39278	-0.759888	-0.40148	0.189442	0.314869	0.972794
elav	FBgn0260400	11.8717	10.8251	3.55035	12.8657	34.1121	1.07451	1.03443	0.550271	1.10943	1.53291
arg	FBgn0023535	0.447364	0.7868	2.47835	8.56833	4.58769	-0.349339	-0.104136	0.394163	0.932896	0.661594
lncRNA:enrr	FBgn0286870	0	0.134837	0	0	0		-0.870192
CG4293	FBgn0024983	19.0769	21.893	11.4922	18.1231	7.12328	1.28051	1.34031	1.0604	1.25823	0.85268
Appl	FBgn0000108	15.3332	4.08764e-14	4.39864	6.97865e-07	14.0969	1.18563	-13.3885	0.643318	-6.15623	1.14912
mir-4960	FBgn0263534	0	0	0	0	0
vnd	FBgn0261930	0.190409	0.197138	1.59234	0	0	-0.720314	-0.70523	0.202035
spdi	FBgn0025633	88.534	35.3163	20.5251	45.9044	20.6451	1.94711	1.54797	1.31229	1.66185	1.31482
lncRNA:CR45474	FBgn0267030	9.75082	0.000587817	3.84942	1.23988	4.91404	0.989041	-3.23076	0.585396	0.0933782	0.691439
CG13365	FBgn0029529	83.1678	122.284	40.3905	89.7309	50.5836	1.91996	2.08737	1.60628	1.95294	1.70401
Vsp37A	FBgn0016038	24.6032	30.2173	92.4137	47.5129	16.744	1.39099	1.48026	1.96574	1.67681	1.22386
CG13369	FBgn0025640	31.6781	49.7141	14.0955	70.5991	68.3859	1.50076	1.69648	1.14908	1.8488	1.83497
CG13364	FBgn0026879	424.275	418.415	158.545	321.398	388.697	2.62765	2.62161	2.20015	2.50704	2.58961
lncRNA:CR45475	FBgn0267031	2.27205	1.46443	1.25426e-07	1.77376e-07	1.62618e-07	0.356418	0.165668	-6.90161	-6.7511	-6.78883
Hinfp	FBgn0025635	26.312	7.89954	8.13372	7.14879	7.69503	1.42015	0.897602	0.910289	0.854233	0.88621
RpL36	FBgn0002579	5364.45	4401.69	2232.36	4206.27	4643.83	3.72953	3.64362	3.34876	3.6239	3.66688
Mybbp1A	FBgn0001341	41.3958	18.6422	11.0312	5.24553	19.1005	1.61696	1.2705	1.04262	0.719789	1.28104
Dredd	FBgn0020381	13.6402	23.0479	19.6727	20.437	19.906	1.13482	1.36263	1.29386	1.31042	1.29898
mir-9372	FBgn0283549	0	0	0	0	0
su(sable)	FBgn0003575	30.9794	38.1638	9.88664	50.4199	54.416	1.49107	1.58165	0.995049	1.7026	1.73573
CG13367	FBgn0025634	17.0737	19.5277	7.69566	13.5606	27.7798	1.23233	1.29065	0.886246	1.13228	1.44373
Roc1a	FBgn0025638	320.172	256.137	100.435	176.463	175.362	2.50538	2.40847	2.00188	2.24665	2.24393
Hmt4-20	FBgn0025639	93.6425	55.57	28.5073	40.6186	52.3044	1.97147	1.74484	1.45496	1.60873	1.71854
SkpA	FBgn0025637	148.11	207.133	53.7875	181.479	226.481	2.17058	2.31625	1.73068	2.25883	2.35503
sdk	FBgn0021764	85.9268	29.7787	20.5073	60.4731	75.7483	1.93413	1.47391	1.31191	1.78156	1.87937
CG13362	FBgn0029531	0.232514	0.218301	0	4.649	0	-0.633551	-0.660944		0.66736
CG5254	FBgn0040383	2.43436e-09	85.5059	9.26032e-05	30.3098	90.0092	-8.61361	1.932	-4.03337	1.48158	1.95429
CG13361	FBgn0029532	0.256884	0.134837	0	2.1162	0	-0.590263	-0.870192		0.325557
CG5273	FBgn0040382	6.18919	8.47745	3.5558	54.3784	8.4959	0.791634	0.928265	0.550937	1.73543	0.92921
lncRNA:CR44965	FBgn0266280	0	0.222169	0	2.60937	0		-0.653316		0.416535
RpL22	FBgn0015288	60.0541	507.479	45.5792	420.588	365.341	1.77854	2.70542	1.65877	2.62386	2.5627
lncRNA:CR42491	FBgn0259993	14.5466	20.5675	3.82696	13.2626	0.148144	1.16276	1.31318	0.582854	1.12263	-0.829317
snoRNA:Psi18S-531	FBgn0083027	1.22476	3.73811	2.91376	7.7627	3.49238	0.0880509	0.572653	0.464453	0.890013	0.543122
snoRNA:Psi28S-2179	FBgn0086666	0.334474	0.181289	0	0	0	-0.475638	-0.741627
lncRNA:CR44966	FBgn0266281	0.177649	0.440571	3.50165	0	0	-0.750438	-0.355985	0.544273
fz3	FBgn0027343	3.841	26.9254	1.98315	12.3163	1.99892e-06	0.584444	1.43016	0.297356	1.09048	-5.6992
tw	FBgn0086368	0.0896558	0.472878	0.788545	4.22087	0	-1.04742	-0.325251	-0.103173	0.625401
CG13360	FBgn0025620	1.70633	5.96507	9.36343	119.112	5.28036e-10	0.232062	0.775615	0.971435	2.07595	-9.27734
lncRNA:CR44469	FBgn0265662	0	0	0	0	0
CG16989	FBgn0025621	9.68997	34.9341	6.136	35.0971	22.635	0.986322	1.54325	0.787885	1.54527	1.35478
Rbf	FBgn0015799	30.7529	20.577	24.3891	22.761	15.2918	1.48789	1.31338	1.3872	1.35719	1.18446
CG13359	FBgn0025616	0.751903	0.447433	69.4085	4.09182	3.62669	-0.123838	-0.349272	1.84141	0.611917	0.559511
CG13358	FBgn0026874	0.201134	0	4.56313	0	0	-0.696514		0.659263
Sec22	FBgn0260855	23.9521	29.5177	6.86095	47.2965	20.0515	1.37934	1.47008	0.836384	1.67483	1.30215
CG43867	FBgn0264449	32.6763	8.5478	11.806	10.2892	39.2038	1.51423	0.931854	1.0721	1.01238	1.59333
CG14635	FBgn0029535	1.4537	5.29731	0.626323	196.091	6.48083e-22	0.162474	0.724056	-0.203201	2.29246	-21.1884
CG3713	FBgn0040343	0.392583	0.71833	1.73082	32.158	4.65591	-0.406069	-0.143676	0.238251	1.50729	0.668004
CG14634	FBgn0040892	1.32367	8.64952	2.02255	427.748	1.11104e-10	0.12178	0.936992	0.3059	2.63119	-9.95427
CG11664	FBgn0040341	0.239599	0.0782272	0	0	0	-0.620515	-1.10664
CG11663	FBgn0029539	1.40057	0.475987	158.963	3.59944	2.93648	0.146306	-0.322405	2.2013	0.556235	0.467827
Lztr1	FBgn0040344	12.886	13.0619	8.51864	12.1591	18.4999	1.11012	1.11601	0.93037	1.0849	1.26717
MED22	FBgn0040339	93.9425	63.2723	44.9104	46.4442	47.8517	1.97286	1.80121	1.65235	1.66693	1.6799
CG3708	FBgn0040345	0.00725673	0.0073128	86.878	0.00214831	8.74264	-2.13926	-2.13592	1.93891	-2.6679	0.941642
CG3706	FBgn0040342	0.102662	0	0	2.10341	0	-0.988589			0.322924
CG32815	FBgn0052815	7.45753	5.75218	0.91716	2.74063e-07	3.15824e-07	0.872595	0.759832	-0.0375547	-6.56215	-6.50055
TRAM	FBgn0040340	24.3375	84.7895	8.42999	46.0092	19.8805	1.38628	1.92834	0.925827	1.66284	1.29843
CG3704	FBgn0040346	36.0279	35.912	13.5539	22.8306	31.9847	1.55664	1.55524	1.13207	1.35852	1.50494
mus81	FBgn0040347	9.67432	4.73682	3.38787	3.72941e-05	8.53236	0.98562	0.675487	0.529926	-4.42836	0.931069
CG3703	FBgn0040348	0.379416	3.94112	3.94726	8.80681e-05	5.08629	-0.420884	0.59562	0.596295	-4.05518	0.706401
CG3699	FBgn0040349	0.621059	2.57142	3.92272e-09	30.7049	2.63471e-08	-0.206867	0.410173	-8.40641	1.48721	-7.57927
CG3690	FBgn0040350	0.864167	4.939	4.46088e-17	253.691	6.29962e-19	-0.0634024	0.693639	-16.3506	2.4043	-18.2007
lncRNA:CR45476	FBgn0267032	0	0	0	0	0
CG18823	FBgn0042146	9.5353	1.65875	9.72084	1.19555e-07	2.66691	0.979334	0.219781	0.987704	-6.92243	0.426009
TfIIA-S-2	FBgn0040338	351.463	0.594932	124.649	0.0821159	40.483	2.54588	-0.225533	2.09569	-1.08557	1.60727
CG14631	FBgn0029552	0.659719	0.000194828	48.9109	0.880025	4.22119	-0.180641	-3.71035	1.68941	-0.0555049	0.625435
su(w[a])	FBgn0003638	22.8509	25.4555	8.36447	19.3526	35.0931	1.3589	1.40578	0.922438	1.28674	1.54522
CG11638	FBgn0040351	29.7852	9.01082e-08	9.40943	3.31024	2.06396e-09	1.474	-7.04524	0.973564	0.519859	-8.6853
CG32814	FBgn0052814	36.6536	6.80516e-08	6.3451	9.44712e-06	14.1129	1.56412	-7.16716	0.802438	-5.0247	1.14962
CG3021	FBgn0040337	27.8961	23.4729	27.925	26.0565	16.1916	1.44554	1.37057	1.44599	1.41592	1.20929
Cdc45	FBgn0026143	10.4132	14.0979	4.67774	5.94173	11.5416	1.01758	1.14915	0.670036	0.773913	1.06227
Rpp21	FBgn0053082	3.91396	3.38625	2.1737	3.47578	5.74798	0.592616	0.529718	0.3372	0.541052	0.759516
CG14630	FBgn0014903	0.140446	0.272321	1.97087	2.08943	0	-0.852491	-0.564919	0.294658	0.320029
CG42259	FBgn0266569	4.0817	10.0127	4.87734	24.3298	7.73312	0.610841	1.00055	0.688183	1.38614	0.888355
lncRNA:CR44779	FBgn0266005	0.809068	6.82892e-05	22.9607	1.80981	4.5898	-0.0920148	-4.16565	1.36099	0.257632	0.661794
CG14629	FBgn0040398	0.0145048	3.48227	1.59346	37.6904	10.248	-1.83849	0.541863	0.202342	1.57623	1.01064
CG3655	FBgn0040397	65.2145	65.4134	10.1189	81.9938	23.8579	1.81434	1.81567	1.00513	1.91378	1.37763
CG14628	FBgn0040365	16.3594	2.18114	95.5656	3.16627	11.217	1.21377	0.338683	1.9803	0.500549	1.04988
eIF4E7	FBgn0040368	2.23231	0.00064098	148.18	8.14885e-05	9.08907e-05	0.348754	-3.19316	2.17079	-4.0889	-4.04148
CG11378	FBgn0040364	3.51327	4.12855	1.33813	86.8979	1.19365e-08	0.545712	0.615798	0.1265	1.93901	-7.92312
CG11384	FBgn0040363	0.23968	0.259704	0	0	0	-0.620369	-0.585521
CG11379	FBgn0040362	1.33322	1.56879	130.852	5.30447	6.71595	0.124902	0.195566	2.11678	0.724642	0.827107
CG14627	FBgn0040361	0.198873	0.134837	3.05415	4.92511	0	-0.701424	-0.870192	0.484891	0.692416
CG14626	FBgn0040360	0.161254	0.231722	0	0	0	-0.79249	-0.635033
CG11380	FBgn0040359	0.130558	0	0	0	0	-0.884198
CG14625	FBgn0040358	0.146658	0	0	0	0	-0.833693
CG11381	FBgn0029568	0.102307	0	0	0	0	-0.990097
CG14624	FBgn0040357	0.0753774	0	0	0	0	-1.12276
CG11382	FBgn0040367	6.9966	0.413465	2.23016	2.68839e-08	5.16689e-08	0.844887	-0.383561	0.348336	-7.57051	-7.28677
CG11398	FBgn0040366	6.97559	7.30521	0.924009	5.55375	14.8279	0.843581	0.863633	-0.0343239	0.744586	1.17108
CG3638	FBgn0261444	34.5635	102.546	17.0563	100.742	72.1278	1.53862	2.01092	1.23188	2.00321	1.8581
CG11403	FBgn0026876	30.9385	19.8787	9.95351	17.3458	6.11294	1.4905	1.29839	0.997976	1.2392	0.78625
Atf3	FBgn0028550	5.46105	23.0886	2.99926	236.792	148.488	0.737276	1.3634	0.477014	2.37437	2.17169
CG32812	FBgn0025642	6.76183	3.02647	97.4687	2.24704	6.58746e-08	0.830064	0.480936	1.98886	0.351612	-7.18128
DAAM	FBgn0025641	17.3649	53.1868	15.8244	32.7781	0.0043045	1.23967	1.7258	1.19933	1.51558	-2.36608
CG32811	FBgn0052811	4.26336	1.8035	169.825	1.2198	1.72002e-08	0.629752	0.256116	2.23	0.0862871	-7.76447
lncRNA:CR46248	FBgn0267970	0.0951577	0.21527	0	0	0	-1.02156	-0.667016
fs(1)N	FBgn0004650	4.5592	1.11385e-07	13.9681	1.67657	2.95686	0.658888	-6.95317	1.14514	0.22442	0.47083
CG11409	FBgn0024366	18.0991	0.397008	1.33919e-07	0.471299	4.41514e-08	1.25766	-0.401201	-6.87316	-0.326704	-7.35506
Naa30A	FBgn0024362	54.4213	81.0936	20.8234	48.2652	62.2391	1.73577	1.90899	1.31855	1.68363	1.79406
MTPAP	FBgn0024360	13.5121	6.24886	15.6711	7.39565	8.16247	1.13072	0.795801	1.1951	0.868976	0.911821
Tsp2A	FBgn0024361	0.287485	0.319041	1.96139	14.6955	5.40861	-0.541385	-0.496153	0.292563	1.16718	0.733085
CG12773	FBgn0024365	7.86499	14.2762	3.98534	12.9275	10.1671	0.895698	1.15461	0.600465	1.11152	1.0072
CG11417	FBgn0024364	57.8776	31.8184	16.6761	15.6666	21.3905	1.76251	1.50268	1.22209	1.19497	1.33022
png	FBgn0000826	2.54961	1.12098	1.8418	2.877	1.5055	0.406473	0.0495967	0.265242	0.458939	0.17768
CG14770	FBgn0029573	0.278673	0.129888	1.55574	7.84143	0	-0.554905	-0.886431	0.191936	0.894395
ssx	FBgn0024987	68.4071	39.2613	16.7588	34.7414	37.4385	1.8351	1.59396	1.22424	1.54085	1.57332
mir-4961	FBgn0263552	0	0	0	0	0
AMPKalpha	FBgn0023169	19.6649	37.5387	19.6907	27.0217	45.3785	1.29369	1.57448	1.29426	1.43171	1.65685
CG3719	FBgn0024986	29.7915	28.8081	17.4146	49.1778	46.5292	1.47409	1.45951	1.24091	1.69177	1.66773
CG32813	FBgn0052813	58.0599	12.4376	16.2651	11.0782	97.5291	1.76388	1.09474	1.21126	1.04447	1.98913
Rilpl	FBgn0024985	29.209	46.8922	12.3549	45.2451	43.8214	1.46552	1.6711	1.09184	1.65557	1.64169
futsch	FBgn0259108	13.0437	6.64191	6.11626	7.76125	11.6419	1.1154	0.822293	0.786486	0.889932	1.06602
Gr2a	FBgn0265139	0.0555366	0	0	0	0	-1.25542
CG14785	FBgn0027795	1.928	3.03814	83.1474	4.11094	3.16402	0.285108	0.482608	1.91985	0.613941	0.500239
Lrpprc2	FBgn0027794	10.1632	13.973	4.78019	9.04878	14.191	1.00703	1.14529	0.679445	0.95659	1.15201
CG14787	FBgn0027793	3.16499	0.515588	3.04229	1.23442	2.71775	0.500372	-0.287697	0.4832	0.0914641	0.43421
Ns3	FBgn0266284	34.3475	21.816	15.9883	11.4941	0.0034664	1.53589	1.33878	1.2038	1.06047	-2.46012
O-fut2	FBgn0027791	12.6506	34.1146	9.52043	17.0535	9.4596	1.10211	1.53294	0.978656	1.23181	0.975873
CG14777	FBgn0026872	3.75109	23.2542	3.53097	16.4943	9.7577	0.574158	1.3665	0.547894	1.21733	0.989347
CG14778	FBgn0029580	0.883388	4.27557	9.18007e-09	4.57748e-08	52.8528	-0.0538485	0.630994	-8.03715	-7.33937	1.72307
CG32808	FBgn0052808	0.594132	1.81795	4.85075	3.39511	3.93752	-0.226117	0.259583	0.685809	0.530853	0.595223
pck	FBgn0013720	18.3274	103.974	9.66462	119.671	16.2423	1.2631	2.01692	0.985185	2.07799	1.21065
CG14780	FBgn0025383	0.265744	0.479917	0	0	0	-0.575537	-0.318833
Rab27	FBgn0025382	11.1013	11.9166	4.69618	6.80907	2.81499	1.04537	1.07615	0.671744	0.833088	0.449476
mei-38	FBgn0260986	10.7978	7.81467	4.682	4.04617	9.74053	1.03333	0.89291	0.670431	0.607044	0.988583
rush	FBgn0025381	10.1038	26.9355	18.1543	33.8631	17.0757	1.00449	1.43033	1.25898	1.52973	1.23238
sta	FBgn0003517	2848.72	2921.2	1233.97	2390.96	2296.3	3.45465	3.46556	3.09131	3.37857	3.36103
snoRNA:M	FBgn0044508	0	0	0	0	0
snoRNA:Me28S-G980	FBgn0086042	0	0	0	0	0
inc	FBgn0025394	71.6027	77.6437	25.2808	46.7426	66.0924	1.85493	1.89011	1.40279	1.66971	1.82015
Nmdar2	FBgn0053513	4.95403	0.134837	2.49809	7.99934e-05	6.4868	0.694959	-0.870192	0.397607	-4.09695	0.81203
CG14795	FBgn0025393	13.321	1.27983	1.71312	6.82169	2.39934e-10	1.12454	0.107151	0.233788	0.833892	-9.61991
Mur2B	FBgn0025390	5.11651	0.00550136	2.88491	3.88903	18.9565	0.708974	-2.25953	0.460132	0.589841	1.27776
sncRNA:400	FBgn0065095	0	0	0	0	0
br	FBgn0283451	0.646564	99.3787	12.8466	59.8755	9.38848	-0.189388	1.99729	1.10879	1.77725	0.972595
dor	FBgn0000482	9.03939	9.95237	5.86123	12.9004	8.38505	0.956139	0.997927	0.767989	1.1106	0.923506
CG3740	FBgn0023530	17.5638	12.2235	12.2311	11.1989	14.2101	1.24462	1.0872	1.08747	1.04918	1.1526
hfw	FBgn0001189	7.0346	15.0161	4.95097	19.2783	28.8866	0.847239	1.17656	0.69469	1.28507	1.4607
CG32809	FBgn0023531	9.14093	4.90412	3.29614	5.67322	7.17446	0.960991	0.690561	0.518006	0.75383	0.855789
CG14797	FBgn0029587	0.1066	0.197138	0	0	0	-0.972244	-0.70523
b6	FBgn0024897	7.73763e-06	0	1.53786	2.53749	0	-5.11139		0.186918	0.404405
a6	FBgn0023130	10.7632	5.67102	5.20046	5.82567	5.93181e-05	1.03194	0.753661	0.716042	0.765346	-4.22681
CG3795	FBgn0025378	0.490066	1.13442e-07	48.5435	1.91279	9.09759	-0.309745	-6.94523	1.68613	0.281666	0.958926
Scgdelta	FBgn0025391	0.102307	0.231722	0	0	9.4086	-0.990097	-0.635033			0.973525
prage	FBgn0283741	0.63081	651.602	140.726	278.488	141.145	-0.200101	2.81398	2.14838	2.44481	2.14967
Adar	FBgn0026086	48.662	33.5292	15.655	30.6495	57.098	1.68719	1.52542	1.19465	1.48642	1.75662
mir-981	FBgn0262178	0	0	0	0	0
CG32806	FBgn0052806	0.000741859	0.00153298	106.544	0.000434993	3.63217	-3.12968	-2.81446	2.02753	-3.36152	0.560166
CG14810	FBgn0029589	21.1838	1.12877e-08	12.8836	5.81629e-06	1.69506e-06	1.326	-7.9474	1.11004	-5.23535	-5.77081
CG14811	FBgn0029590	18.304	2.63325	8.59261	2.4997	2.89251e-07	1.26255	0.420492	0.934125	0.397888	-6.53872
Lamtor5	FBgn0026090	72.6507	131.618	24.4331	97.2909	49.7331	1.86124	2.11931	1.38798	1.98807	1.69665
deltaCOP	FBgn0028969	67.4055	61.8906	43.461	68.4921	54.7556	1.8287	1.79162	1.6381	1.83564	1.73843
Gcna	FBgn0023515	20.6326	13.4659	6.55586	4.16056	6.88586	1.31455	1.12924	0.81663	0.619152	0.837958
MED18	FBgn0026873	53.2457	49.8695	38.1649	32.9984	26.5235	1.72628	1.69784	1.58166	1.51849	1.42363
Pex5	FBgn0023516	14.999	8.50722	28.6186	10.6328	5.24851	1.17606	0.929788	1.45665	1.02665	0.720036
CG14803	FBgn0023513	11.3068	7.96246	3.5156	4.02082	4.43347	1.05334	0.901047	0.545999	0.604315	0.646743
Pgam5	FBgn0023517	47.769	58.7315	30.3882	35.0053	28.2802	1.67915	1.76887	1.4827	1.54413	1.45148
Vps26	FBgn0014411	42.9455	39.3414	31.2498	30.7067	24.5867	1.63292	1.59485	1.49485	1.48723	1.3907
CG14817	FBgn0026089	84.4367	100.466	43.5181	71.0333	75.6101	1.92653	2.00202	1.63867	1.85146	1.87858
CG14805	FBgn0023514	47.6976	29.0775	10.8145	16.0561	10.3336	1.6785	1.46356	1.03401	1.20564	1.01425
CG14818	FBgn0026088	48.4257	92.1317	35.8748	132.683	117.994	1.68508	1.96441	1.55479	2.12282	2.07186
Coa8	FBgn0029594	47.7151	31.9178	36.8199	34.6816	37.1964	1.67866	1.50403	1.56608	1.5401	1.5705
trr	FBgn0023518	23.6949	17.6277	8.4265	10.6538	18.289	1.37465	1.2462	0.925647	1.02751	1.26219
mRpL16	FBgn0023519	93.4952	71.7136	64.4077	42.7438	45.8102	1.97079	1.8556	1.80894	1.63087	1.66096
arm	FBgn0000117	154.827	245.798	72.2327	178.772	233.749	2.18985	2.39058	1.85873	2.2523	2.36875
Ldaf1	FBgn0052803	31.4087	45.091	20.376	29.071	31.1851	1.49705	1.65409	1.30912	1.46346	1.49395
asRNA:CR45929	FBgn0267591	0.27966	0.288858	1.58363	0	0	-0.55337	-0.539316	0.199654
asRNA:CR43864	FBgn0264446	8.32324	0.495774	2.55717	0.373133	1.35434e-07	0.920293	-0.304716	0.407759	-0.428136	-6.86827
CG32801	FBgn0052801	0.543952	0.632593	3.07702	1.8085	4.65257	-0.264439	-0.198876	0.48813	0.257318	0.667693
Edem1	FBgn0023511	13.8587	18.288	8.64937	22.8337	21.8477	1.14172	1.26217	0.936984	1.35858	1.33941
mip130	FBgn0023509	20.0099	16.562	7.41423	15.1521	8.90132	1.30124	1.21911	0.870066	1.18047	0.949455
Rbcn-3B	FBgn0023510	18.4869	35.5084	5.74799	33.6786	48.0761	1.26686	1.55033	0.759516	1.52735	1.68193
eIF2Bepsilon	FBgn0023512	36.6791	27.2542	16.6574	11.9066	21.8395	1.56442	1.43543	1.22161	1.07579	1.33924
Ocrl	FBgn0023508	25.5771	22.7982	12.9377	15.1789	13.2735	1.40785	1.3579	1.11186	1.18124	1.12299
CG11596	FBgn0023522	38.8053	18.4684	8.97524	6.57382	15.3135	1.58889	1.26643	0.953046	0.817818	1.18507
CG3857	FBgn0023520	3.13559	7.40843	3.93166	5.03238	12.6493	0.496319	0.869726	0.594576	0.701773	1.10207
CG3587	FBgn0023521	18.218	13.4221	27.7828	9.36214	9.42427	1.2605	1.12782	1.44378	0.971375	0.974247
Hr4	FBgn0264562	24.782	3.27022e-05	4.45411	5.09142	6.68375	1.39414	-4.48542	0.648761	0.706839	0.82502
PIG-K	FBgn0023545	15.9491	23.9595	18.4613	33.0307	38.7356	1.20274	1.37948	1.26626	1.51892	1.58811
lncRNA:CR45478	FBgn0267034	0.131335	0.212639	0	0	0	-0.88162	-0.672357
mir-2496	FBgn0262297	0	0	0	0	0
east	FBgn0261954	144.724	72.5564	40.9414	61.7502	117.484	2.16054	1.86068	1.61216	1.79064	2.06998
Actn	FBgn0000667	28.2898	57.9369	8.89373	30.6603	281.363	1.45163	1.76296	0.949084	1.48658	2.44927
mir-4954	FBgn0263542	0	0	0	0	0
usp	FBgn0003964	16.6537	34.4277	4.25929	31.2928	25.9928	1.22151	1.53691	0.629337	1.49544	1.41485
CG4313	FBgn0025632	1.16504	1.35693	2.1257	2.29104	48.6733	0.0663425	0.132559	0.327502	0.360033	1.68729
CG4325	FBgn0026878	2.3114e-07	57.8894	2.3359	6.42561	4.04837e-08	-6.63613	1.7626	0.368454	0.807914	-7.39272
moody	FBgn0025631	0.000162945	125.636	0.000917993	49.721	13.0181	-3.78796	2.09911	-3.03716	1.69654	1.11455
Sik2	FBgn0025625	1.7242	3.33277	4.43666e-08	23.0862	22.9451	0.236587	0.522805	-7.35294	1.36335	1.36069
asRNA:CR44896	FBgn0266201	0	0	0	0	0
CG4281	FBgn0025626	50.1445	31.0702	21.0139	14.3818	24.3034	1.70022	1.49234	1.32251	1.15781	1.38567
CG14054	FBgn0029596	0.000142789	1.45e-07	59.8866	2.34526	5.87129	-3.8453	-6.83863	1.77733	0.37019	0.768733
asRNA:CR44381	FBgn0265531	3.63847	2.59793	2.39607	0.251779	4.41909	0.560919	0.414627	0.379499	-0.598981	0.645333
CG4199	FBgn0025628	3.17983	56.8225	17.315	72.0357	85.1944	0.502403	1.75452	1.23842	1.85755	1.93041
CG4194	FBgn0025627	0.819107	0.447409	0	0	0	-0.0866593	-0.349296
asRNA:CR44382	FBgn0265532	4.78772	4.10134	2.02294e-07	4.64597	4.40124	0.680128	0.612926	-6.69402	0.667076	0.643575
Rtca	FBgn0025630	22.547	10.3061	11.3066	5.57822	12.5037	1.35309	1.0131	1.05333	0.746495	1.09704
CG4045	FBgn0025629	42.3354	40.6035	14.3173	27.8277	12.1573	1.6267	1.60856	1.15586	1.44448	1.08484
CG4025	FBgn0025624	5.9712	20.944	1.35449	14.827	25.2771	0.776061	1.32106	0.131775	1.17105	1.40273
CG16903	FBgn0040394	46.176	35.8639	22.6786	22.8346	29.9978	1.66442	1.55466	1.35562	1.35859	1.47709
Unc-76	FBgn0040395	22.1161	33.204	19.3284	58.5971	30.7661	1.34471	1.52119	1.2862	1.76788	1.48807
csw	FBgn0000382	16.8066	244.135	15.022	98.011	134.857	1.22548	2.38763	1.17673	1.99127	2.12987
snoRNA:Me18S-C1024	FBgn0086043	0	0.231722	0	0	0		-0.635033
ph-d	FBgn0004860	34.3228	21.1432	11.2902	14.1227	22.7945	1.53558	1.32517	1.0527	1.14992	1.35783
ph-p	FBgn0004861	31.8554	28.5121	9.84333	29.8898	31.3833	1.50318	1.45503	0.993142	1.47552	1.4967
D2hgdh	FBgn0023507	0.732203	34.4317	8.98035e-05	31.9785	20.9564	-0.135368	1.53696	-4.04671	1.50486	1.32132
Pgd	FBgn0004654	4.09816	22.7162	8.41804	14.5689	18.6781	0.612589	1.35634	0.925211	1.16343	1.27133
bcn92	FBgn0013432	64.7728	58.2174	36.5913	33.1684	24.803	1.81139	1.76505	1.56338	1.52072	1.39451
wapl	FBgn0004655	49.6076	28.4502	12.4025	16.9221	37.8354	1.69555	1.45408	1.09351	1.22845	1.5779
Cyp4d1	FBgn0005670	0.102307	0	0	0	4.7043	-0.990097				0.672495
CG3630	FBgn0023540	11.6505	2.05416	2.79583	3.92364	196.866	1.06634	0.312634	0.446511	0.593689	2.29417
mir-3641	FBgn0263630	0	0	0	0	0
ND-B14.5A	FBgn0025839	122.362	208.796	113.356	143.465	111.584	2.08765	2.31972	2.05444	2.15675	2.0476
Cyp4d14	FBgn0023541	1.99507	1.62468	0.482074	1.51628	3.02808e-07	0.299959	0.210768	-0.316886	0.18078	-6.51883
asRNA:CR45479	FBgn0267035	3.80724	3.49017	1.64499	1.67309e-07	2.10424	0.580611	0.542847	0.216162	-6.77648	0.323094
asRNA:CR44690	FBgn0265901	5.75237	6.96305	3.67628	6.50086	2.49246	0.759847	0.842799	0.565409	0.812971	0.396628
Cyp4d2	FBgn0011576	1.72425	1.90615	1.33395	6.05032	6.04655	0.236599	0.280158	0.125139	0.781779	0.781508
Cyp4ae1	FBgn0015036	0.842643	0.167917	0	4.50599	0	-0.0743566	-0.774905		0.65379
pn	FBgn0003116	12.1955	3.8199	4.33318	6.45057	4.93418	1.0862	0.582051	0.636807	0.809598	0.693215
Nmd3	FBgn0023542	18.8325	23.8479	8.44485	18.873	0.00360659	1.27491	1.37745	0.926592	1.27584	-2.4429
CG17776	FBgn0040899	267.095	211.144	143.397	118.809	134.399	2.42667	2.32458	2.15654	2.07485	2.1284
CG17777	FBgn0040900	1.35607	3.07838	34.6625	1.30971e-08	1.63986e-08	0.132282	0.488322	1.53986	-7.88282	-7.78519
CG3457	FBgn0024984	0.545085	1.39976	1.16026e-08	2.25228e-08	2.44538e-08	-0.263536	0.146055	-7.93544	-7.64738	-7.61165
Mct1	FBgn0023549	0.525334	60.3677	1.52435	90.6457	1.38254e-07	-0.279564	1.7808	0.183084	1.95735	-6.85932
CG14053	FBgn0029603	0.18279	3.96961e-05	41.0562	3.49788	0.629425	-0.738049	-4.40125	1.61338	0.543804	-0.201056
asRNA:CR43637	FBgn0263628	1.148	0.334909	52.106	1.98085	1.4294	0.059941	-0.475073	1.71689	0.296851	0.155155
FarO	FBgn0023550	0	0	0	0	7.44537					0.871886
SmydA-8	FBgn0053548	2.33589e-08	1.98583e-05	0	2.52458	58.4961	-7.63155	-4.70206		0.402189	1.76713
Vinc	FBgn0004397	5.64314	37.9774	3.5862	76.6563	198.799	0.751521	1.57953	0.554634	1.88455	2.29841
CG14052	FBgn0029606	0.133673	0.000331112	0	14.5069	0	-0.873957	-3.48003		1.16158
pcx	FBgn0003048	31.0697	50.0447	14.0346	29.4317	27.0495	1.49234	1.69936	1.1472	1.46882	1.43216
kz	FBgn0001330	33.3579	31.1567	7.24561	13.9626	12.6879	1.5232	1.49355	0.860075	1.14497	1.10339
fs(1)K10	FBgn0000810	19.867	18.0303	17.7185	19.1935	14.2349	1.29813	1.256	1.24843	1.28316	1.15335
Or2a	FBgn0023523	5.55454	1.14081	8.39226e-08	6.45496e-08	7.00841	0.744648	0.0572126	-7.07612	-7.19011	0.84562
crn	FBgn0000377	32.9711	22.013	15.0675	6.01039	8.84488	1.51813	1.34268	1.17804	0.778903	0.946692
CG3191	FBgn0023525	0.695942	2.98085	5.77169	8.44571	8.88645	-0.157427	0.47434	0.761303	0.926636	0.948728
CG3091	FBgn0029608	3.89217e-11	8.38401	2.5277	36.8028	10.7486	-10.4098	0.923452	0.402725	1.56588	1.03135
CG3078	FBgn0023524	0.140328	0.395233	1.43239	4.8683	0	-0.852855	-0.403147	0.156061	0.687377
temp	FBgn0027296	10.5855	10.1086	7.68121	13.4882	6.30071	1.02471	1.00469	0.88543	1.12995	0.79939
CG3071	FBgn0023527	31.041	20.2688	7.05409	8.6586	7.15015	1.49194	1.30683	0.848441	0.937448	0.854315
CG2924	FBgn0023528	73.7121	118.078	15.9839	87.7158	62.3621	1.86754	2.07217	1.20368	1.94308	1.79492
lncRNA:CR45480	FBgn0267036	1.49998	2.11335	0.802446	1.19629	4.61464e-07	0.176086	0.324971	-0.0955844	0.0778374	-6.33586
Grp170	FBgn0023529	79.1581	73.498	35.5895	60.1859	36.6939	1.8985	1.86628	1.55132	1.77949	1.56459
Vml	FBgn0085362	0.0711087	0.222772	0	0	0	-1.14808	-0.65214
CG2865	FBgn0023526	335.505	44.8934	142.838	63.5353	77.7753	2.5257	1.65218	2.15484	1.80302	1.89084
Raf	FBgn0003079	14.979	14.524	6.52069	7.66126	16.1832	1.17548	1.16209	0.814294	0.8843	1.20906
lncRNA:CR34052	FBgn0054052	0.239826	0.307112	0	0	5.85581e-12	-0.620104	-0.512704			-11.2324
CG14050	FBgn0040392	0.800035	3.35893	1.43681e-08	1.32839	5.96477e-08	-0.0968912	0.526201	-7.8426	0.123325	-7.22441
CG2854	FBgn0040391	0.111278	0.000117711	69.3532	3.08291	5.01469	-0.953591	-3.92918	1.84107	0.48896	0.700244
lncRNA:CR33218	FBgn0053218	2.11941	0.000945936	185.525	3.75646	13.3384	0.326215	-3.02414	2.2684	0.574779	1.1251
Ilp6	FBgn0044047	4.78394e-07	137.441	0.0772949	17.2104	7.27257	-6.32021	2.13812	-1.11185	1.23579	0.861688
mRpL14	FBgn0040389	61.2232	76.3901	25.3775	32.1091	27.2982	1.78692	1.88304	1.40445	1.50663	1.43613
CG2841	FBgn0003159	3.44241	4.66184	84.959	10.7898	6.2594	0.536862	0.668557	1.92921	1.03301	0.796532
PsGEF	FBgn0264598	5.54828	1.34329	7.74018	1.07437e-07	4.30744	0.744159	0.12817	0.888751	-6.96885	0.634219
CG12496	FBgn0040385	0.0555366	0.258717	0	0	0	-1.25542	-0.587175
CG32797	FBgn0052797	1.52375	1.06049	1.52183e-07	3.13789	4.86298e-07	0.182913	0.0255046	-6.81763	0.496638	-6.3131
gt	FBgn0001150	1.47961	4.58868	1.91703e-08	1.1088e-07	1.21284e-07	0.170148	0.661688	-7.71737	-6.95515	-6.9162
tko	FBgn0003714	108.866	161.518	52.1502	75.4211	61.5093	2.03689	2.20822	1.71726	1.87749	1.78894
boi	FBgn0040388	4.1742	6.00231	1.97593	92.0015	7.55154	0.620573	0.778318	0.295771	1.96379	0.878036
z	FBgn0004050	15.1733	33.0806	12.4719	20.3011	22.2144	1.18108	1.51957	1.09593	1.30752	1.34664
trol	FBgn0284408	18.0863	349.146	17.6468	386.385	363.281	1.25735	2.54301	1.24667	2.58702	2.56024
mir-4955	FBgn0263531	0	0	0	0	0
Pdfr	FBgn0260753	6.83567	0.213806	3.01026	14.116	14.772	0.834781	-0.66998	0.478604	1.14971	1.16944
Vha36-3	FBgn0040377	2.42783	0.163438	7.64209	1.04521e-10	1.00216e-10	0.385218	-0.786646	0.883212	-9.9808	-9.99906
AANATL7	FBgn0040376	1.92121	0.757253	20.2073	4.36544e-10	7.54506e-10	0.283576	-0.120759	1.30551	-9.35997	-9.12234
CG13760	FBgn0040375	13.004	3.69726	10.0015	5.75357	8.11171	1.11408	0.56788	1.00007	0.759937	0.909112
wds	FBgn0040066	147.381	91.9085	60.9673	49.9557	23.7398	2.16844	1.96336	1.7851	1.69858	1.37548
egh	FBgn0001404	76.5265	73.8031	41.8929	161.71	119.682	1.88381	1.86807	1.62214	2.20874	2.07803
Klp3A	FBgn0011606	35.5833	22.0101	106.896	11.2733	7.41568	1.55125	1.34262	2.02896	1.05205	0.870151
Zw10	FBgn0004643	40.8539	27.5033	15.4918	14.5243	14.0264	1.61123	1.43938	1.1901	1.1621	1.14695
Smyd3	FBgn0011566	14.4803	9.54754	4.32002	3.65768	0.00103519	1.16078	0.979892	0.635486	0.563206	-2.98498
eIF3g1	FBgn0029629	219.331	230.188	84.5449	175.517	218.586	2.3411	2.36208	1.92709	2.24432	2.33962
Tsp3A	FBgn0040334	5.29487	8.2849	2.06604	8.60674	4.13067	0.723856	0.918287	0.315139	0.934838	0.61602
Seipin	FBgn0040336	4.73997	5.33141	3.57057	4.8994	5.92693	0.675775	0.726842	0.552738	0.690142	0.77283
brv3	FBgn0040333	0.503721	0.487593	5.28465	0.465222	4.61899	-0.29781	-0.311943	0.723016	-0.33234	0.664547
Pi4KIIIalpha	FBgn0267350	11.5508	20.5373	6.96753	15.5699	32.796	1.06261	1.31254	0.843079	1.19229	1.51582
sgg	FBgn0003371	90.7224	63.7604	48.9188	143.225	88.7807	1.95771	1.80455	1.68948	2.15602	1.94832
lncRNA:CR45197	FBgn0266707	0	0	0	0	0
HLH3B	FBgn0011276	0.102307	0	3.50165	0	0	-0.990097		0.544273
CG2652	FBgn0025838	6.68999	3.7459	184.534	1.21537	6.43208e-08	0.825426	0.573556	2.26608	0.084709	-7.19165
lncRNA:CR44470	FBgn0265663	0.228092	0.1568	2.21577	0	0	-0.641889	-0.804653	0.345526
per	FBgn0003068	3.4009	1.49846	1.63439	7.2242	22.3346	0.531594	0.175644	0.213357	0.85879	1.34898
dyw	FBgn0000092	1.62037	8.41643	7.0261e-13	2.30012e-12	1.10697e-11	0.209613	0.925128	-12.1533	-11.6382	-10.9559
Spg7	FBgn0024992	21.5798	12.4445	40.6736	11.685	19.7371	1.33405	1.09498	1.60931	1.06763	1.29528
CG2662	FBgn0024993	18.5887	5.76307	9.90012	0.00124854	13.1764	1.26925	0.760654	0.995641	-2.9036	1.1198
Ugalt	FBgn0024994	7.63239	10.7054	3.84885	7.80737	6.13473	0.882661	1.0296	0.585332	0.892505	0.787796
eIF2Bbeta	FBgn0024996	28.9263	24.7303	16.8707	23.3275	20.7561	1.46129	1.39323	1.22713	1.36787	1.31715
CG2680	FBgn0024995	5.18292	2.24792	4.5569	2.62393e-09	2.81644e-09	0.714575	0.35178	0.658669	-8.58105	-8.5503
CG2681	FBgn0024997	1.58292	0.958829	0.0837294	3.36138e-08	2.19078	0.199458	-0.018259	-1.07712	-7.47348	0.340599
CG2685	FBgn0024998	43.0029	19.5505	8.51017	8.52412	13.4205	1.6335	1.29116	0.929938	0.93065	1.12777
CG2694	FBgn0024991	39.606	8.07177	20.3091	4.3502	0.00178041	1.59776	0.906969	1.30769	0.638509	-2.74948
CG2701	FBgn0024973	45.6944	16.8912	26.2961	4.46973	19.8432	1.65986	1.22766	1.41989	0.650282	1.29761
fs(1)Yb	FBgn0000928	16.3403	47.949	7.52873	12.6962	1.01971e-09	1.21326	1.68078	0.876722	1.10367	-8.99152
fs(1)Ya	FBgn0000927	0.443191	2.19657e-07	0.315329	0	0	-0.353409	-6.65826	-0.501235
vilya	FBgn0283545	25.7362	1.37099	13.1991	4.06646	14.2179	1.41054	0.137034	1.12055	0.609216	1.15283
dwg	FBgn0000520	27.0015	12.8972	6.72834	6.2115	13.9627	1.43139	1.1105	0.827908	0.793196	1.14497
ttm50	FBgn0250874	53.2764	31.4102	29.8964	25.1128	14.3133	1.72653	1.49707	1.47562	1.39989	1.15574
CG2712	FBgn0024975	5.42003	3.55532	5.44884	7.26583	6.3094	0.734002	0.550879	0.736304	0.861285	0.799988
crm	FBgn0000376	31.2267	9.68977	7.28906	6.93173	0.00228715	1.49453	0.986314	0.862672	0.840842	-2.64071
Syx4	FBgn0024980	27.6471	2.04229e-07	12.9249	6.28939	4.06471	1.44165	-6.68988	1.11143	0.798608	0.60903
kirre	FBgn0028369	12.2412	19.8917	6.10776	35.3393	22.211	1.08782	1.29867	0.785882	1.54826	1.34657
lncRNA:CR43494	FBgn0263505	0.310089	0	0	0	0	-0.508514
CG32795	FBgn0040384	9.7213	8.33084	50.0463	32.8924	15.0537	0.987725	0.920689	1.69937	1.5171	1.17764
w	FBgn0003996	6.26682	62.6191	40.6637	39.5756	22.174	0.797047	1.79671	1.60921	1.59743	1.34584
CG12498	FBgn0040356	0.000524269	0.000148951	39.4429	5.08757e-07	6.47334	-3.28045	-3.82696	1.59597	-6.29349	0.811128
CG14416	FBgn0040352	0.542588	6.9849	1.90618	3.02282	3.56453e-07	-0.26553	0.84416	0.280163	0.480413	-6.448
CG14417	FBgn0040353	0.1066	0	0	0	0	-0.972244
CG14418	FBgn0040354	0.340489	0.258291	0	0	0	-0.467897	-0.58789
CG14419	FBgn0029639	0.000320954	0.304385	0.0819822	15.1632	0.731766	-3.49356	-0.516577	-1.08628	1.18079	-0.135628
CG3526	FBgn0040355	3.13484	2.39937e-06	23.5992	8.90944	4.3144	0.496216	-5.6199	1.3729	0.94985	0.634921
CG3588	FBgn0025643	0.183725	0.204382	0	1.52802	0	-0.735831	-0.689558		0.184129
CG14424	FBgn0025644	0.0555366	0.231722	0	0	0	-1.25542	-0.635033
CG32793	FBgn0052793	0.194917	0.224267	0	0	0	-0.71015	-0.649234
CG3592	FBgn0029642	0.297258	0.0353718	8.69601	8.64551e-09	1.35439e-08	-0.526867	-1.45134	0.93932	-8.06321	-7.86826
CG3598	FBgn0025645	0.150761	0.169731	0	0	0	-0.821711	-0.770238
CG14420	FBgn0029643	0.150515	0.119129	3.50165	0	0	-0.82242	-0.923983	0.544273
CG14421	FBgn0029644	0.272763	0.0641	0	0	0	-0.564214	-1.19314
CG14422	FBgn0029645	0.126818	0	3.27427	0	0	-0.896819		0.515114
CG14423	FBgn0029646	0.18438	0	0	0	0	-0.734286
CG17959	FBgn0029647	0.150755	0	0	0	0	-0.821729
CG3603	FBgn0029648	3.19953	25.5968	4.561	69.3761	15.0103	0.505086	1.40819	0.65906	1.84121	1.17639
rst	FBgn0003285	2.64088	32.6561	1.11565	52.0118	7.51565	0.421749	1.51396	0.0475271	1.7161	0.875967
CG4116	FBgn0029649	0.579645	1.82364e-14	2.54115	0	0	-0.236838	-13.7391	0.40503
N	FBgn0004647	68.3236	220.216	13.845	228.875	29.9985	1.83457	2.34285	1.14129	2.3596	1.4771
CG18508	FBgn0028746	31.3471	13.3372	145.841	22.4506	39.1302	1.4962	1.12507	2.16388	1.35123	1.59251
Fcp3C	FBgn0000644	2.00645	4.96008	1.94163	3.89311	2.66166e-07	0.302429	0.695488	0.288167	0.590297	-6.57485
CG3939	FBgn0040396	58.895	53.0521	130.811	51.3541	50.3855	1.77008	1.7247	2.11664	1.71057	1.70231
dnc	FBgn0000479	265.065	101.879	48.1067	17.3291	87.4496	2.42335	2.00809	1.68221	1.23878	1.94176
CG14265	FBgn0040393	0	0.330501	0	0	0		-0.480827
ng2	FBgn0010294	0	0.288857	0	0	0		-0.539317
ng3	FBgn0010295	0	0.197138	0	0	0		-0.70523
ng1	FBgn0002933	0	0.163038	0	0	0		-0.787711
ng4	FBgn0010296	0	0	0	0	0
Pig1	FBgn0003086	0	0.290451	0	0	0		-0.536928
Sgs4	FBgn0003374	5.94008e-07	0.891758	0	0	0	-6.22621	-0.0497531
lncRNA:CR44886	FBgn0266180	0.584195	0.120658	0.82058	0.875616	3.42235e-07	-0.233442	-0.918443	-0.0858793	-0.0576865	-6.46568
CG10793	FBgn0029656	2.96507	3.1868	31.6284	2.66404	9.22236e-08	0.472035	0.503355	1.50008	0.425542	-7.03516
lncRNA:CR46243	FBgn0267963	0.0555366	0	0	0	0	-1.25542
lncRNA:CR44999	FBgn0266350	9.99862e-09	2.80229e-08	5.86409e-16	4.43748e-16	4.6493e-16	-8.00006	-7.55249	-15.2318	-15.3529	-15.3326
Myc	FBgn0262656	772.349	387.211	150.761	180.945	317.038	2.88781	2.58795	2.17829	2.25755	2.50111
CG12535	FBgn0029657	5.14123	6.67963	49.9203	5.17338	4.11329	0.711067	0.824752	1.69828	0.713774	0.614189
tRNA:Gln-TTG-2-1	FBgn0052493	0	0.134837	0	0	0		-0.870192
CG14269	FBgn0029658	0.823555	0.0539048	100.276	2.68094	0.537573	-0.0843072	-1.26837	2.0012	0.428288	-0.269563
CG16782	FBgn0029659	2.16398	2.32277	215.757	6.55493	10.3184	0.335254	0.366006	2.33397	0.816568	1.01361
CG10801	FBgn0029660	3.64269	4.50843	54.5265	4.07924	1.52012e-08	0.561422	0.654026	1.73661	0.610579	-7.81812
CG16781	FBgn0029661	1.23975	0.000287155	79.2447	3.24074	4.97605	0.0933341	-3.54188	1.89897	0.510644	0.696885
CG12206	FBgn0029662	2.35217	17.2044	22.3578	13.4337	4.8888e-07	0.371468	1.23564	1.34943	1.1282	-6.3108
CG10804	FBgn0029663	2.61777	3.07374	3.6545e-08	8.40893e-08	7.81621e-08	0.417932	0.487667	-7.43717	-7.07526	-7.107
CG10802	FBgn0029664	25.0875	20.6249	7.62707	8.37403	8.48131	1.39946	1.31439	0.882358	0.922935	0.928463
CG14270	FBgn0029665	41.4144	24.3248	63.271	12.2714	3.48357	1.61715	1.38605	1.8012	1.0889	0.542025
CG10803	FBgn0029666	140.284	70.5023	40.6113	50.9841	61.0989	2.14701	1.8482	1.60865	1.70743	1.78603
Gas8	FBgn0029667	1.16453	0.00139523	49.6432	2.00728	4.6351	0.0661507	-2.85535	1.69586	0.302607	0.666059
DIP-alpha	FBgn0052791	8.29345	7.05484	4.9792	4.63878	3.94867	0.918735	0.848487	0.69716	0.666404	0.596451
CG13021	FBgn0029669	5.01971	5.29141	135.695	10.1118	1.08182e-07	0.700678	0.723571	2.13256	1.00483	-6.96585
lncRNA:CR34335	FBgn0267910	21509.3	56980.7	19339.6	66508.3	86897.6	4.33263	4.75573	4.28645	4.82288	4.93901
ppk8	FBgn0052792	0.142638	1.30051	9.85785e-11	6.34288e-09	5.16621e-09	-0.845766	0.114113	-10.0062	-8.19771	-8.28683
CG2875	FBgn0029672	31.6896	20.232	13.6279	16.9913	0.00130394	1.50092	1.30604	1.13443	1.23023	-2.88474
AstA-R1	FBgn0266429	0.388204	0.232893	3.06563e-12	3.6309e-12	5.59866e-12	-0.41094	-0.632844	-11.5135	-11.44	-11.2519
Ilp7	FBgn0044046	0.106944	0.0872201	0	5.79446	6.4868	-0.970843	-1.05938		0.763013	0.812031
Parg	FBgn0023216	8.03651	8.56237	3.36949	6.31105	10.1138	0.905068	0.932594	0.527564	0.800101	1.00492
Mnt	FBgn0023215	32.1434	33.9834	9.96657	72.8724	53.7004	1.50709	1.53127	0.998546	1.86256	1.72998
lncRNA:CR45102	FBgn0266549	23.8136	18.0935	6.11075	17.6932	42.43	1.37682	1.25752	0.786094	1.24781	1.62767
Rala	FBgn0015286	146.21	183.664	46.2958	184.184	188.668	2.16498	2.26403	1.66554	2.26525	2.2757
Tlk	FBgn0283657	187.136	103.192	79.1245	92.4644	107.798	2.27216	2.01364	1.89831	1.96597	2.03261
mir-4962	FBgn0263532	0	0	0	0	0
HIP-R	FBgn0029676	93.9559	42.3643	93.6457	28.0342	34.0081	1.97292	1.627	1.97149	1.44769	1.53158
lncRNA:CR44117	FBgn0264948	0	0	0	0	0
Crg-1	FBgn0021738	0.199179	0.316352	1.97087	0	0	-0.700758	-0.499829	0.294658
HIP	FBgn0260484	51.0851	18.5084	29.5642	7.78657	0.00548696	1.70829	1.26737	1.47077	0.891346	-2.26067
lncRNA:CR44118	FBgn0264949	0	0	0	0	0
fd3F	FBgn0264954	0.123481	0	0	0	0	-0.9084
ec	FBgn0000542	1.13879e-05	18.7969	2.26579	5.92267	24.272	-4.94356	1.27409	0.355219	0.772517	1.3851
tRNA:Gln-CTG-2-1	FBgn0052785	0.161254	0	0	0	0	-0.79249
tRNA:Pro-CGG-3-1	FBgn0025118	0.146658	0	0	0	0	-0.833693
CG2901	FBgn0029679	1.18715	1.61222	31.0031	0.874042	1.29499e-08	0.074507	0.207424	1.4914	-0.0584679	-7.88773
lncRNA:roX1	FBgn0019661	3.71581	2237.76	71.5411	2127.4	1977.73	0.570053	3.34981	1.85456	3.32785	3.29617
yin	FBgn0265575	3.2131	0.300206	3.56457	0.666582	7.40809e-08	0.506924	-0.522581	0.552007	-0.176146	-7.13029
CG2930	FBgn0028491	0.568618	0.363403	11.7892	59.1185	9.35966	-0.245179	-0.439611	1.07148	1.77172	0.97126
VhaAC39-1	FBgn0285910	38.003	91.3836	23.0755	91.3524	73.4861	1.57982	1.96087	1.36315	1.96072	1.86621
CG15239	FBgn0029681	0.382451	0.18798	0	0	0	-0.417425	-0.725888
CG42541	FBgn0260658	3.71844	0.400905	3.03562	2.10279e-13	4.68452	0.570361	-0.396959	0.482247	-12.6772	0.670665
CG2938	FBgn0029685	8.62358	16.8002	3.68402	8.19503	9.45616	0.935688	1.22531	0.566322	0.913551	0.975715
Glos	FBgn0029686	13.886	8.97692	4.19991	7.13377	12.7717	1.14258	0.953127	0.62324	0.853319	1.10625
Gem4b	FBgn0052786	12.0994	0.959157	12.8201	6.25588e-08	1.0981e-07	1.08276	-0.0181101	1.10789	-7.20371	-6.95936
Gem4c	FBgn0052783	7.98412	2.704	14.9572	3.43421e-07	5.71507	0.902227	0.432007	1.17485	-6.46417	0.757021
Vap33	FBgn0029687	903.251	549.157	195.479	410.219	598.854	2.95581	2.7397	2.2911	2.61302	2.77732
lva	FBgn0029688	35.9508	53.8239	27.4033	37.3055	43.0031	1.55571	1.73097	1.4378	1.57177	1.6335
CG6428	FBgn0029689	4.26799	10.4486	5.59535	9.49583	13.4621	0.630223	1.01906	0.747827	0.977533	1.12911
CG6414	FBgn0029690	1.39993	6.1068	1.73185	2.30139e-08	2.13316e-08	0.146106	0.785814	0.23851	-7.63801	-7.67098
asRNA:CR45481	FBgn0267037	20.2441	3.36633e-10	2.7829	1.25556e-09	0.000126784	1.3063	-9.47284	0.444498	-8.90116	-3.89694
lncRNA:CR43298	FBgn0262990	0.180651	4.02649e-08	21.206	0	0	-0.74316	-7.39507	1.32646
lncRNA:CR45482	FBgn0267038	6.4246	1.29098e-08	0.836447	9.56965e-09	1.22085e-08	0.807846	-7.88908	-0.0775618	-8.0191	-7.91334
lncRNA:CR46247	FBgn0267969	0.394367	0.184468	0	0	0	-0.4041	-0.734079
lncRNA:CR46349	FBgn0286029	0.118701	0	1.59204	0	0	-0.925547		0.201955
CG43689	FBgn0263772	8.2999	0.431267	1.49735	8.92429e-15	4.22572	0.919073	-0.365254	0.175323	-14.0494	0.6259
Cmtr1	FBgn0029693	36.0721	31.2158	12.4064	23.6417	23.5788	1.55717	1.49437	1.09364	1.37368	1.37252
CG15375	FBgn0029694	3.50345	2.31516	22.5971	1.57862e-08	7.08838	0.544496	0.364581	1.35405	-7.80172	0.850547
Xpac	FBgn0004832	45.3462	14.1736	21.7586	8.48302	8.01222	1.65654	1.15148	1.33763	0.92855	0.903753
brn	FBgn0000221	3.72445	4.4279	6.38969	5.34595	7.13794	0.571062	0.646198	0.80548	0.728025	0.853573
cib	FBgn0026084	66.4462	173.929	45.4574	739.252	44.3383	1.82247	2.24037	1.6576	2.86879	1.64678
Nsun2	FBgn0026079	24.2451	25.8434	12.0635	8.66722	22.4503	1.38462	1.41235	1.08147	0.93788	1.35122
dgt4	FBgn0026085	46.9371	28.954	17.8556	11.0292	0.0454061	1.67152	1.46171	1.25177	1.04254	-1.34289
Tip60	FBgn0026080	16.7526	14.662	18.1316	15.7454	22.9563	1.22408	1.16619	1.25844	1.19715	1.3609
tyf	FBgn0026083	195.848	108.79	45.2251	74.488	92.36	2.29192	2.03659	1.65538	1.87209	1.96548
GlcAT-I	FBgn0066114	5.86598	9.90936	2.6136	7.14032	5.69164	0.768341	0.996045	0.41724	0.853718	0.755237
Fas2	FBgn0000635	291.299	1452.09	75.8786	702.135	217.182	2.46434	3.16199	1.88012	2.84642	2.33682
CG43288	FBgn0262980	1.01896	0.348183	28.1039	1.91354	1.60081e-08	0.00815688	-0.458192	1.44877	0.281838	-7.79566
CG15571	FBgn0029696	0	0	0	0	0
CG15570	FBgn0029697	0	0	3.18467	0	0			0.503065
Femcoat	FBgn0041252	0	0	0	0	6.4868					0.812031
Muc4B	FBgn0052774	1.05932	0.593482	19.2815	0.513368	5.16647e-09	0.0250268	-0.226592	1.28514	-0.289571	-8.28681
CG43134	FBgn0262608	0.222453	0.0661244	4.76022	2.1162	0	-0.652762	-1.17964	0.677627	0.325557
CG43135	FBgn0262609	0.102307	0	0	0	0	-0.990097
CG15576	FBgn0029700	0.482098	0.00064986	164.134	8.2835	3.12277	-0.316865	-3.18718	2.2152	0.918214	0.49454
CG12691	FBgn0029701	0.640716	0.275318	80.1786	2.80896	3.73552	-0.193334	-0.560166	1.90406	0.448545	0.572352
CG15572	FBgn0029702	0.000892463	0.000965872	83.0495	0.000139877	3.05098	-3.04941	-3.01508	1.91934	-3.85425	0.484439
lncRNA:CR45483	FBgn0267039	1.24938	0.0405992	2.02977	5.53682e-09	6.32195e-09	0.0966954	-1.39148	0.307447	-8.25674	-8.19915
CG15577	FBgn0040904	2.73183	0.00586797	256.726	3.13172	5.89802	0.436453	-2.23151	2.40947	0.495783	0.770706
CG15578	FBgn0040905	1.15766	9.69497e-07	129.865	3.93738	4.26322	0.0635812	-6.01345	2.11349	0.595207	0.629738
CG12692	FBgn0029703	2.12356	0.000857733	70.6034	0.000141826	2.546	0.327064	-3.06665	1.84883	-3.84824	0.405858
CG15579	FBgn0040906	4.04438	0.0184946	143.298	5.86746	6.3243	0.606852	-1.73296	2.15624	0.76845	0.801013
lncRNA:CR44957	FBgn0266262	1.33232	1.04717	7.35607e-10	8.59432e-09	5.42001	0.124609	0.0200179	-9.13335	-8.06579	0.734
lncRNA:CR46156	FBgn0267868	0.143661	0.202679	0	0	0	-0.842661	-0.693191
mei-9	FBgn0002707	18.9049	8.47513	0.102066	4.30846	10.0092	1.27657	0.928146	-0.991118	0.634322	1.0004
NO66	FBgn0266570	71.3645	27.0476	26.68	16.8862	21.9823	1.85348	1.43213	1.42619	1.22753	1.34207
mRpL33	FBgn0040907	261.701	264.394	89.2229	163.79	142.521	2.4178	2.42225	1.95048	2.21429	2.15388
norpA	FBgn0262738	99.9596	41.219	19.3944	51.6581	228.971	1.99982	1.6151	1.28768	1.71314	2.35978
CG12693	FBgn0029705	0.0738563	0.0270489	112.306	1.48998	4.47841	-1.13161	-1.56785	2.0504	0.17318	0.651123
mir-982	FBgn0262339	0	0	0	0	0
mir-303	FBgn0262390	0	0	0	0	0
CG3626	FBgn0029706	0.61925	11.24	1.56447	14.8057	9.53604	-0.208134	1.05077	0.194368	1.17043	0.979368
mir-983-1	FBgn0262235	0	0	0	0	0
mir-983-2	FBgn0262279	0	0	0	0	0
mir-984	FBgn0262282	0	0	0	0	0
asRNA:CR43614	FBgn0263589	21.7714	0.572214	6.40898	1.24839e-07	1.6389	1.33789	-0.242442	0.806789	-6.90365	0.214552
lncRNA:CR46499	FBgn0288701	10.6463	2.92399e-11	7.41634	4.22954e-07	8.53997e-07	1.0272	-10.534	0.87019	-6.37371	-6.06854
FBgn0288701		6.37074	0.179234	1.529	1.71825e-08	0.360812	0.80419	-0.746581	0.184407	-7.76491	-0.442719
lncRNA:CR32773	FBgn0052773	5.12924	0.376456	1.33957e-08	0.572119	3.40855e-09	0.710053	-0.424286	-7.87303	-0.242514	-8.46743
bi	FBgn0000179	0.489967	0.0727851	0.457482	0.268819	1.44729e-15	-0.309833	-1.13796	-0.339626	-0.570541	-14.8394
CG3556	FBgn0029708	4.43031	0.126167	3.02808	2.26769e-09	0.230065	0.646434	-0.899055	0.481167	-8.64442	-0.63815
rb	FBgn0003210	48.6282	41.8895	28.7711	35.4856	36.6417	1.68689	1.62211	1.45896	1.55005	1.56398
CHOp24	FBgn0029709	91.1227	105.681	32.517	126.499	78.4787	1.95963	2.024	1.51211	2.10209	1.89475
CG3568	FBgn0029710	10.5587	4.12316	7.18176	4.72927	6.92884	1.02361	0.61523	0.856231	0.674794	0.840661
Usf	FBgn0029711	43.7349	30.5953	18.2816	47.8381	36.9342	1.64083	1.48566	1.26201	1.67977	1.56743
CG15912	FBgn0029712	9.53622	1.53794e-05	5.0303	2.67524	0.00319819	0.979376	-4.81306	0.701594	0.427362	-2.4951
CG11436	FBgn0029713	5.62806	15.7236	0.692109	6.246	2.36806	0.750359	1.19655	-0.159826	0.795602	0.374392
CG3527	FBgn0029714	62.8112	55.4723	15.5889	31.6995	18.2919	1.79804	1.74408	1.19281	1.50105	1.26226
CG11444	FBgn0029715	12.9273	68.38	52.8576	60.0379	60.2178	1.11151	1.83493	1.72311	1.77843	1.77973
CG3546	FBgn0029716	0.279232	0.0975455	1.97087	0	0	-0.554035	-1.01079	0.294658
CG12684	FBgn0029717	1.39062	0.000597304	165.148	7.44624	2.39984	0.143208	-3.2238	2.21787	0.871937	0.380183
peb	FBgn0003053	74.182	1.31559	32.6678	81.2823	17.4094	1.8703	0.11912	1.51412	1.91	1.24078
Alms1b	FBgn0025387	1.28601	1.40736	82.1324	5.89621	8.06607	0.109243	0.148405	1.91451	0.770573	0.906662
Alms1a	FBgn0025388	19.9199	13.0857	110.496	15.898	6.90609	1.29929	1.1168	2.04335	1.20134	0.839232
pon	FBgn0025739	14.0716	23.9941	4.77857	8.93289	10.7296	1.14834	1.3801	0.679298	0.950992	1.03058
CG3081	FBgn0025613	0	0	1.77152	0	0			0.248347
CG3062	FBgn0025612	0.0624405	0.0198672	50.1067	2.38325	3.82185	-1.20453	-1.70186	1.6999	0.37717	0.582273
HLH4C	FBgn0011277	0.181644	0	0	0	0	-0.740778
mRpL30	FBgn0029718	77.5433	114.726	47.0236	62.228	34.5241	1.88954	2.05966	1.67232	1.79399	1.53812
Torsin	FBgn0025615	31.9672	72.5574	9.89102	46.5807	17.9392	1.5047	1.86068	0.995241	1.66821	1.2538
Cbp80	FBgn0022942	48.2011	35.511	17.2998	16.7831	25.2782	1.68306	1.55036	1.23804	1.22487	1.40275
CG15473	FBgn0029719	0	0	0	0	0
CG3009	FBgn0029720	0.102998	0.112688	3.0872e-09	0.222875	0.352907	-0.987173	-0.948124	-8.51043	-0.651938	-0.45234
fzr	FBgn0262699	14.7088	7.54386	19.1286	24.233	9.80003	1.16758	0.877594	1.28168	1.38441	0.991227
Pp2C1	FBgn0022768	120.801	50.973	158.117	73.1463	71.3374	2.08207	1.70734	2.19898	1.86419	1.85332
ctp	FBgn0011760	1480.37	554.016	568.923	468.912	561.429	3.17037	2.74352	2.75505	2.67109	2.74929
Pdha	FBgn0028325	43.4275	56.8856	9.22265	66.2177	56.1733	1.63777	1.755	0.964856	1.82097	1.74953
CG7024	FBgn0029722	1.82241	0.0351924	69.8521	2.26908	4.52123	0.260645	-1.45355	1.84418	0.35585	0.655256
Proc-R	FBgn0029723	1.31652	3.1872	6.33035e-08	2.60837	5.00825	0.119426	0.50341	-7.19857	0.416369	0.699686
CG15472	FBgn0029724	0.798716	1.82784e-05	47.6148	3.15352	8.81375	-0.0976077	-4.73806	1.67774	0.498795	0.945161
Klf15	FBgn0025679	0	0	0	0	0
lncRNA:CR45515	FBgn0267071	0	0	0	0	0
CG2871	FBgn0029725	1.37123	0.00419678	189.183	5.51328	13.9942	0.137112	-2.37708	2.27688	0.74141	1.14595
CG15471	FBgn0029726	8.66929	8.82268	244.488	9.68187	3.44329e-08	0.937983	0.9456	2.38826	0.985959	-7.46303
CG6978	FBgn0029727	0.938409	6.01577e-09	5.23688	4.76349e-09	5.39456e-09	-0.027608	-8.22071	0.719073	-8.32207	-8.26804
CG2861	FBgn0029728	22.7612	0.00231765	215.124	1.02414e-06	2.11297e-07	1.35719	-2.63495	2.33269	-5.98964	-6.67511
lncRNA:CR45516	FBgn0267072	0.133682	0	0	0	0	-0.873926
CG12682	FBgn0029729	3.86837	1.91096	115.85	5.06112	7.4219e-08	0.587528	0.281252	2.0639	0.704246	-7.12949
CG42594	FBgn0260971	0.29604	0.0121196	0.166416	5.95491e-10	1.4647e-09	-0.52865	-1.91651	-0.778804	-9.22512	-8.83425
lncRNA:CR43495	FBgn0263506	1.29161	0.755312	17.4554	0.398896	2.36548e-08	0.111133	-0.121874	1.24193	-0.399141	-7.62608
boil	FBgn0029730	1.35289	0.182986	134.874	7.89192	4.51193	0.131264	-0.737581	2.12993	0.897183	0.654362
CG6927	FBgn0029733	13.9511	0.168498	1.51651	1.06515e-08	0.223754	1.14461	-0.773406	0.180847	-7.97259	-0.650229
CG32772	FBgn0052772	44.0882	107.742	33.6022	59.8611	100.076	1.64432	2.03239	1.52637	1.77714	2.00033
CG4041	FBgn0029736	8.27864	9.83997	2.76047	7.1673	9.02258	0.917959	0.992994	0.440983	0.855356	0.955331
CG6903	FBgn0029737	19.6948	35.0664	91.0325	43.4153	32.1939	1.29435	1.54489	1.9592	1.63764	1.50777
hpRNA:CR46342	FBgn0285992	125.128	0.255762	46.6483	7.65328	22.5381	2.09735	-0.592164	1.66884	0.883848	1.35292
CG44774	FBgn0266000	420.657	57.6875	742.78	66.2205	109.99	2.62393	1.76108	2.87086	1.82099	2.04135
Ptp4E	FBgn0004368	21.0124	30.2563	7.2395	45.5656	37.6146	1.32248	1.48082	0.859709	1.65864	1.57536
lncRNA:CR44833	FBgn0266096	14.2473	1.06285e-07	4.34687	4.1882e-13	5.42228	1.15373	-6.97353	0.638177	-12.378	0.734182
CG15468	FBgn0061196	0.00101099	0.000398097	78.8588	1.32088	1.73882	-2.99525	-3.40001	1.89685	0.120864	0.240256
lncRNA:CR45792	FBgn0267442	1.22451	0.387544	5.90836	2.97988e-08	8.28657	0.087962	-0.411679	0.771467	-7.5258	0.918375
CG12680	FBgn0029740	1.80503	1.9754	98.8519	2.10413	1.52503e-08	0.256484	0.295656	1.99498	0.323073	-7.81672
ovo	FBgn0003028	235.985	1.26875e-07	33.2261	7.58174	18.2589	2.37288	-6.89662	1.52148	0.879769	1.26147
CG32767	FBgn0052767	193.386	90.5387	113.562	106.813	244.387	2.28642	1.95683	2.05523	2.02863	2.38808
rg	FBgn0266098	1.70227	0.221123	9.14292e-09	1.81081	4.09575e-08	0.231027	-0.655367	-8.03891	0.257874	-7.38767
CG15465	FBgn0029746	0	0	0	0	0
Rpn13R	FBgn0029745	0.00100259	9.88304e-08	60.8216	0.0366981	3.17418	-2.99888	-7.00511	1.78406	-1.43536	0.501632
CG5062	FBgn0029747	1.25962	2.63158e-07	77.4774	1.30185	6.24026	0.100238	-6.57978	1.88917	0.114562	0.795203
lncRNA:CR44834	FBgn0266097	0.451089	0.000141263	30.7251	0.0779943	6.48213	-0.345738	-3.84997	1.48749	-1.10794	0.811718
CG42749	FBgn0261803	0.892235	0.322323	3.30402	1.71134e-07	5.806	-0.0495209	-0.491709	0.519042	-6.76666	0.763877
CG3323	FBgn0029750	7.04997	0.707601	152.597	0.763822	7.27939	0.848187	-0.150211	2.18355	-0.117008	0.862095
CG17764	FBgn0029751	2.08555	0.000253244	56.258	5.39063e-08	7.06554	0.319221	-3.59646	1.75018	-7.26836	0.849145
Cdk7	FBgn0263237	52.9783	19.0119	22.879	13.7445	25.9498	1.7241	1.27903	1.35944	1.13813	1.41413
snf	FBgn0003449	204.357	78.223	79.7385	55.168	79.771	2.31039	1.89333	1.90167	1.74169	1.90184
TrxT	FBgn0029752	9.71103	1.76201	650.86	7.28049	7.7168	0.987265	0.246009	2.81349	0.86216	0.887437
dhd	FBgn0011761	148.698	0.000342587	35.6903	0.00028331	0.00333853	2.17231	-3.46523	1.55255	-3.54774	-2.47644
CG4198	FBgn0029753	2.69193	0.000546488	116.895	6.77263	1.60982	0.430064	-3.26242	2.0678	0.830758	0.206778
CG15930	FBgn0029754	232.357	0.000346313	77	0.00116243	14.6084	2.36616	-3.46053	1.88649	-2.93463	1.1646
Sas10	FBgn0029755	50.8584	45.4811	14.2411	28.9148	31.5092	1.70636	1.65783	1.15354	1.46112	1.49844
Rnp4F	FBgn0014024	141.804	25.0431	41.3099	15.3637	29.2921	2.15169	1.39869	1.61605	1.1865	1.46675
Mcm3	FBgn0284442	96.4599	20.5266	17.7219	20.6136	12.5773	1.98435	1.31232	1.24851	1.31415	1.09959
CG3309	FBgn0029756	5.49103	4.73878	3.63559	2.80196	3.82291	0.739654	0.675667	0.560575	0.447462	0.582394
XRCC1	FBgn0026751	61.2536	45.4664	33.1025	25.59	22.4741	1.78713	1.65769	1.51986	1.40807	1.35168
CanB	FBgn0010014	1.00097	0	7.53776	2.60914	15.5457	0.000421826		0.877242	0.416497	1.19161
SK	FBgn0029761	0.542935	2.3982	0.789693	15.9198	240.87	-0.265253	0.379885	-0.102542	1.20194	2.38178
NAAT1	FBgn0029762	1.00592	8.20907	2.41997e-12	229.831	6.48493e-11	0.00256499	0.914294	-11.6162	2.36141	-10.1881
spoon	FBgn0263987	190.03	154.884	85.1398	84.2637	135.909	2.27882	2.19001	1.93013	1.92564	2.13325
Usp16-45	FBgn0029763	20.4852	19.5564	17.5068	18.3022	9.86082	1.31144	1.29129	1.24321	1.2625	0.993913
CG16756	FBgn0029765	1.157	4.68173	8.64854e-14	413.913	1.22609e-13	0.0633335	0.670407	-13.0631	2.61691	-12.9115
lncRNA:CR45517	FBgn0267073	4.78155e-08	11.9857	0.79056	10.5023	16.4319	-7.32043	1.07866	-0.102065	1.02128	1.21569
CG15784	FBgn0029766	0.0759123	87.6797	1.10508	48.5298	25.1909	-1.11969	1.9429	0.0433935	1.68601	1.40124
lncRNA:CR44471	FBgn0265664	0	0	0	2.35293	0				0.37161
SPR	FBgn0029768	0	0	2.62703	5.2323	0			0.419466	0.718693
frma	FBgn0029769	0.182288	3.00345	0.00469262	116.921	5.84359e-14	-0.739243	0.47762	-2.32858	2.06789	-13.2333
CG32762	FBgn0052762	0	0	0	0	0
CG4151	FBgn0029770	0	0	0	0	0
lncRNA:CR45519	FBgn0267075	0	0	0	0	0
CG12730	FBgn0029771	6.12059e-07	29.2106	3.10073	50.0673	101.416	-6.21321	1.46554	0.491463	1.69955	2.00611
asRNA:CR45518	FBgn0267074	0.0979795	0.232801	0	2.46104	0	-1.00886	-0.633016		0.391119
snoRNA:Psi28S-3342	FBgn0086667	21.6299	27.7636	15.4457	26.4472	31.276	1.33505	1.44348	1.18881	1.42238	1.49521
Vsx2	FBgn0263512	0.277683	0.231722	0	0	0	-0.55645	-0.635033
Vsx1	FBgn0263511	0	0.134837	0	0	0		-0.870192
CG34435	FBgn0085464	2.55445	1.73847	69.8214	1.29237	1.59147e-08	0.407297	0.240166	1.84399	0.111386	-7.7982
CG34434	FBgn0250904	47.601	0.130091	95.9817	0.00143786	11.7024	1.67762	-0.885751	1.98219	-2.84228	1.06827
RhoGAP5A	FBgn0029778	10.4704	19.976	6.28239	17.0806	7.74252	1.01996	1.30051	0.798125	1.2325	0.888882
Mlc-c	FBgn0004687	153.632	377.476	147.68	299.006	264.13	2.18648	2.57689	2.16932	2.47568	2.42182
mir-3645	FBgn0263631	0	0	0	0	0
Pop1	FBgn0026702	11.2674	8.96437	5.26882	8.71581	5.94076	1.05182	0.95252	0.721714	0.940308	0.773842
OtopLa	FBgn0259994	4.07994	0.000465962	1.28315	4.31109	84.0145	0.610653	-3.33165	0.108279	0.634587	1.92435
OtopLc	FBgn0259150	8.57006	1.1256	0.246982	9.87177e-10	2.68311e-09	0.932984	0.0513855	-0.607334	-9.00561	-8.57136
asRNA:CR45520	FBgn0267076	0.158251	0.0503213	2.28382	0	0	-0.800654	-1.29825	0.358663
Sirt4	FBgn0029783	16.7041	5.94583	23.118	10.1435	20.2998	1.22282	0.774212	1.36395	1.00619	1.30749
CG4119	FBgn0028474	45.5024	31.7078	16.1913	12.7582	22.8414	1.65803	1.50117	1.20928	1.10579	1.35872
Rab18	FBgn0015794	32.5286	73.7553	22.6223	96.9186	73.2901	1.51227	1.86779	1.35454	1.98641	1.86505
RpL35	FBgn0029785	2674.52	2570.99	1032.75	2081.59	2038.14	3.42725	3.4101	3.01399	3.3184	3.30923
Tre1	FBgn0046687	0.054413	138.353	5.61016	111.179	0.00226553	-1.2643	2.14099	0.748975	2.04602	-2.64483
Gr5a	FBgn0003747	0	0	0	0	0
asRNA:CR44958	FBgn0266263	0.475989	0.171692	3.27742	0	0	-0.322403	-0.765251	0.515532
CG42449	FBgn0259926	0	0.269673	0	0	0		-0.569162
PGAP1	FBgn0029789	2.67368	5.22411	3.74567	8.15016	12.2861	0.427109	0.718012	0.57353	0.911166	1.08942
asRNA:CR45525	FBgn0267081	0.116208	0.290262	0	2.27887	0	-0.934762	-0.53721		0.357719
cv	FBgn0000394	9.58742	12.4333	3.81288	23.3852	9.16374	0.981702	1.09459	0.581253	1.36894	0.962073
CG3149	FBgn0027564	7.4845	11.8231	10.4391	10.5902	5.19279	0.874163	1.07273	1.01866	1.02491	0.7154
lncRNA:CR42794	FBgn0261927	0.196352	0.477644	3.2774	0	0	-0.706965	-0.320895	0.51553
AdamTS-B	FBgn0029791	4.77013e-06	71.8741	1.97469	35.4877	22.7449	-5.32147	1.85657	0.295498	1.55008	1.35688
CG33080	FBgn0053080	0.833606	12.2388	4.66781e-08	73.5613	10.6768	-0.079039	1.08774	-7.33089	1.86665	1.02844
Snx27	FBgn0052758	22.1545	52.3937	7.59924	34.187	32.0816	1.34546	1.71928	0.88077	1.53386	1.50626
CG15773	FBgn0029795	0.102307	0.288857	0	0	0	-0.990097	-0.539317
IntS6	FBgn0261383	56.5592	38.0613	25.2842	28.689	44.1837	1.7525	1.58048	1.40285	1.45772	1.64526
Rtel1	FBgn0029798	9.91252	3.93056	5.12642	8.40757	3.77279	0.996184	0.594454	0.709814	0.92467	0.576663
CG15772	FBgn0029799	0.873182	0.339479	1.89272	7.51193	13.9918	-0.0588954	-0.469188	0.277087	0.875751	1.14587
lin-52	FBgn0029800	54.168	19.842	18.5018	20.4726	16.1718	1.73374	1.29759	1.26721	1.31117	1.20876
asRNA:CR45528	FBgn0267084	4.43045	2.0704	1.93031	3.64501	3.5725	0.646447	0.316054	0.285628	0.561698	0.552972
CG15771	FBgn0029801	61.5763	38.5849	35.1625	46.6637	48.6142	1.78941	1.58642	1.54608	1.66898	1.68676
MAPk-Ak2	FBgn0013987	21.0803	47.5675	13.7303	36.1948	48.6542	1.32388	1.67731	1.13768	1.55865	1.68712
CG42699	FBgn0261610	14.3376	10.7763	15.2946	10.4944	13.9572	1.15648	1.03247	1.18454	1.02096	1.1448
CG3097	FBgn0029804	0.461126	3.37106	0.0294163	23.1727	2.65351e-08	-0.33618	0.527766	-1.53141	1.36498	-7.57618
CG42264	FBgn0259149	0.130089	0.240439	0	0	0	-0.88576	-0.618996
CG3108	FBgn0029807	0.0555366	0	0	0	0	-1.25542
CG15767	FBgn0029809	2.2132	1.34286	47.8173	8.36104e-10	1.47191e-09	0.34502	0.128032	1.67959	-9.07774	-8.83212
mir-4963	FBgn0263545	0	0	0	0	0
lncRNA:CR44832	FBgn0266095	0.23431	0.155059	0	0	0	-0.63021	-0.809502
CG12239	FBgn0029810	0.579601	0.169241	1.50466	0	0	-0.236871	-0.771495	0.177438
Cpr5C	FBgn0029811	0.204613	0	3.27761	0	0	-0.689067		0.515557
Prosbeta2R1	FBgn0029812	6.16861	2.87597	155.904	6.11947e-09	19.4336	0.790187	0.458784	2.19286	-8.21329	1.28855
lncRNA:CR45529	FBgn0267085	0	0	2.62703	0	0			0.419466
CG44329	FBgn0265417	2.98385	0.00482125	8.36742	4.91355e-05	9.41218	0.474778	-2.31684	0.922591	-4.3086	0.97369
AgmNAT	FBgn0029813	0.000530133	10.4825	1.05424e-06	5.21647	6.09027	-3.27561	1.02046	-5.97706	0.717377	0.784636
CG15765	FBgn0029814	4.04296e-14	0	5.69753	0	0	-13.3933		0.755687
lncRNA:CR43264	FBgn0262945	4987.96	9.77494	1943.58	335.341	353.158	3.69792	0.990114	3.2886	2.52549	2.54797
tRNA:Glu-CTC-6-1Psi	FBgn0052761	0	0	0	0	0
CG12729	FBgn0029816	0.0136321	1.17334e-05	44.7944	4.28903e-07	8.64218	-1.86544	-4.93058	1.65122	-6.36764	0.936623
CG43136	FBgn0262610	0.000168132	0.611969	48.2607	7.66274e-07	6.44661	-3.77435	-0.21327	1.68359	-6.11562	0.809332
CG43137	FBgn0262611	6.99935	5.22175	284.99	1.25317	2.9366e-08	0.845058	0.717816	2.45483	0.0980111	-7.53216
CG15764	FBgn0029817	1.17082	0.000413985	119.778	0.499697	4.41447	0.0684894	-3.38302	2.07838	-0.301293	0.644878
GAA1	FBgn0029818	19.7918	31.1028	25.3547	25.6292	21.3302	1.29649	1.4928	1.40406	1.40874	1.329
mof	FBgn0014340	26.3979	8.38048	11.5374	5.74704	7.47541	1.42157	0.923269	1.06211	0.759444	0.873635
Usp30	FBgn0029819	17.068	13.438	125.466	14.3322	30.1523	1.23218	1.12834	2.09853	1.15631	1.47932
CG16721	FBgn0029820	19.811	53.7039	87.4966	101.051	75.5452	1.29691	1.73001	1.94199	2.00454	1.87821
lncRNA:CR45668	FBgn0267228	1.21548	3.03658	3.08187	8.35091	2.34161	0.0847465	0.482385	0.488814	0.921734	0.369515
Act5C	FBgn0000042	913.06	1930.43	374.175	2161.9	92.5888	2.9605	3.28565	2.57307	3.33484	1.96656
CG4020	FBgn0029821	7.28848	2.81692	6.32229	2.97195	9.19215e-07	0.862637	0.449774	0.800874	0.473041	-6.03658
CG12236	FBgn0029822	12.7119	4.04819	5.14603	3.107	17.653	1.10421	0.607261	0.711472	0.492341	1.24682
Shmt	FBgn0029823	66.2613	69.8286	20.4744	83.7435	65.8216	1.82126	1.84403	1.31121	1.92295	1.81837
asRNA:CR44108	FBgn0264939	0.16391	0.372219	0	0	4.5453	-0.785394	-0.429201			0.657562
CG3726	FBgn0029824	141.592	409.761	41.7128	144.961	77.0989	2.15104	2.61253	1.62027	2.16125	1.88705
CG12728	FBgn0029825	53.1115	6.5688	24.0453	3.92746	7.80686	1.72519	0.817486	1.38103	0.594112	0.892477
CG32756	FBgn0052756	40.2152	9.63028	35.4437	12.294	11.9057	1.60439	0.983639	1.54954	1.08969	1.07575
CG6041	FBgn0029826	13.9717	13.3643	6.91043e-07	6.43164	19.8657	1.14525	1.12595	-6.1605	0.808322	1.2981
CG32755	FBgn0052755	2.21382	2.75622	17.518	7.9821e-11	9.19466	0.345142	0.440313	1.24348	-10.0979	0.963536
CG6048	FBgn0029827	0.12237	0	0	0	0	-0.912326
CG6067	FBgn0029828	2.333e-07	7.29464	2.58126e-14	7.10049	8.77531	-6.63208	0.863004	-13.5882	0.851288	0.943262
fs(1)M3	FBgn0005390	9.03101	0.744828	0.532426	8.97698e-08	4.13177	0.955736	-0.127944	-0.273741	-7.04687	0.616136
Grip	FBgn0029830	20.6671	5.05609	5.47342	16.1944	123.673	1.31528	0.703815	0.738258	1.20937	2.09227
CG5966	FBgn0029831	0.000348782	1.59195	4.49545	61.0846	10.9474	-3.45745	0.20193	0.652773	1.78593	1.03931
CG4766	FBgn0027546	0	0	0	0	0
lncRNA:CR44498	FBgn0265691	0.102307	0	0	0	0	-0.990097
mab-21	FBgn0029003	0.0753774	0	0	0	0	-1.12276
lncRNA:CR44499	FBgn0265692	0	0	0	0	0
rux	FBgn0003302	6.56522	4.44737	52.455	4.92613	8.79525	0.817249	0.648104	1.71979	0.692506	0.944248
MCTS1	FBgn0029833	37.6298	39.2949	21.7002	31.9845	30.1829	1.57553	1.59434	1.33646	1.50494	1.47976
CG5937	FBgn0029834	0.453589	1.75126e-07	3.27761	0	0	-0.343337	-6.75665	0.515557
CG5921	FBgn0029835	0.176543	0.740782	0	2.17786	0	-0.75315	-0.13031		0.33803
CG43115	FBgn0262575	4.8012e-05	0.000218855	39.2884	2.51859	5.87955	-4.31865	-3.65984	1.59426	0.401157	0.769344
CG5928	FBgn0029836	0.111073	0	0	0	0	-0.95439
Tsp5D	FBgn0029837	7.57575e-06	1.26476	2.29996	12.8717	4.69459	-5.12057	0.102009	0.36172	1.10964	0.671598
CG4666	FBgn0029838	0.256568	1.31481e-06	3.40331	0	0	-0.590797	-5.88114	0.531901
CG4660	FBgn0029839	0	0	0	0	0
raptor	FBgn0029840	36.2342	29.336	8.18654	14.3617	22.9117	1.55912	1.4674	0.9131	1.15721	1.36006
Mipp2	FBgn0026060	2.27508	3.94181	1.85911	2.53195	5.49385e-07	0.356997	0.595696	0.269305	0.403455	-6.26012
asRNA:CR44959	FBgn0266264	0.155576	0.695166	0	0	0	-0.808057	-0.157911
Nep1	FBgn0029843	3.27547	1.50961	3.06566	2.06043	2.69639	0.515274	0.178865	0.486525	0.313958	0.430783
Ca-alpha1T	FBgn0264386	9.88079	4.36419e-08	2.70754	2.20191	638.337	0.994792	-7.3601	0.432575	0.3428	2.80505
CG32750	FBgn0052750	0	0	0	0	0
CG32751	FBgn0052751	0	0	0	0	0
CG43090	FBgn0262536	0	0	0	0	0
vanin-like	FBgn0040069	0	0	0	0	0
Btnd	FBgn0029848	0.150755	0	0	0	0	-0.821729
Efr	FBgn0029849	4.84825	10.3292	11.6887	8.6548	11.1934	0.685585	1.01407	1.06777	0.937257	1.04896
sqh	FBgn0003514	109.745	351.386	63.0507	413.006	407.785	2.04038	2.54578	1.79969	2.61596	2.61043
dtn	FBgn0262730	37.4881	20.5203	22.3419	13.1465	33.6913	1.57389	1.31218	1.34912	1.11881	1.52752
CG14445	FBgn0029851	0.109276	0.21815	0	1.7799	0	-0.961476	-0.661245		0.250395
Rbcn-3A	FBgn0023458	14.2614	32.3649	5.92807	31.6598	34.0235	1.15416	1.51007	0.772913	1.50051	1.53178
Spx	FBgn0015818	57.0799	30.6614	28.4634	16.347	29.5877	1.75648	1.48659	1.45429	1.21344	1.47111
schlank	FBgn0040918	154.664	220.153	55.627	219.656	203.856	2.18939	2.34272	1.74529	2.34174	2.30932
CG3781	FBgn0029853	10.2835	21.4061	32.7076	10.3331	0.0024314	1.01214	1.33054	1.51465	1.01423	-2.61414
Spt6	FBgn0028982	119.513	70.6711	30.2554	45.1358	70.0325	2.07741	1.84924	1.4808	1.65452	1.8453
CG3566	FBgn0029854	97.1644	157.237	75.5291	84.1449	112.058	1.98751	2.19656	1.87811	1.92503	2.04944
Ubi-p5E	FBgn0086558	137.754	187.764	154.315	233.696	322.472	2.13911	2.27361	2.18841	2.36865	2.50849
lncRNA:CR45530	FBgn0267086	0.681919	2.50453	1.44243e-08	0.41359	1.64893	-0.166267	0.398727	-7.84091	-0.383429	0.217202
CG11700	FBgn0029856	3.06961	2.97919	9.98896	3.55053	3.65003	0.487083	0.474099	0.99952	0.550293	0.562296
Top3beta	FBgn0026015	30.6356	129.774	22.6941	34.2357	36.1023	1.48623	2.11319	1.35591	1.53448	1.55753
wuho	FBgn0029857	38.2689	32.2348	5.79032	24.3496	29.2543	1.58285	1.50832	0.762702	1.38649	1.46619
Rpt4	FBgn0028685	77.9763	85.0619	32.9583	68.7417	62.8459	1.89196	1.92974	1.51797	1.83722	1.79828
mldr	FBgn0029858	4.93549	5.96618	4.92972	7.28086	7.34892	0.69333	0.775696	0.692823	0.862183	0.866224
CG15892	FBgn0029859	7.25347	4.95932	408.586	5.28389	10.247	0.860546	0.695422	2.61128	0.722954	1.0106
CG15891	FBgn0029860	54.2471	66.5518	41.0596	63.4125	66.4179	1.73438	1.82316	1.61342	1.80217	1.82229
CG3815	FBgn0029861	14.3585	11.2326	11.6972	8.32761	5.20397	1.15711	1.05048	1.06808	0.92052	0.716335
CG12219	FBgn0043796	11.3477	7.53595	7.01371	8.56223	8.86942	1.05491	0.877138	0.845948	0.932587	0.947895
CG3823	FBgn0029863	1.32133	0.025155	9.09038e-11	7.18065e-11	1.39095e-10	0.121012	-1.59938	-10.0414	-10.1438	-9.85669
CG15894	FBgn0029864	1.32881	0.0746032	9.43028e-11	1.8371e-11	5.16591e-11	0.123464	-1.12724	-10.0255	-10.7359	-10.2869
CG42240	FBgn0250869	0.00105467	8.08565	1.27076	59.3577	64.5887	-2.97688	0.907715	0.104065	1.77348	1.81016
CG3842	FBgn0029866	6.55931e-05	0.254068	0	6.67559	0	-4.18314	-0.595049		0.82449
CG3847	FBgn0029867	42.495	25.2257	7.02189	22.3376	13.7026	1.62834	1.40184	0.846454	1.34904	1.1368
ND-B16.6	FBgn0029868	210.947	265.044	169.501	192.773	168.534	2.32417	2.42332	2.22917	2.28505	2.22669
kdn	FBgn0261955	88.396	70.8839	41.2626	67.9857	111.355	1.94643	1.85055	1.61556	1.83242	2.04671
swa	FBgn0003655	8.24296	1.7296e-07	6.84465	1.42556e-13	7.52199	0.916083	-6.76206	0.835351	-12.846	0.876333
Marf	FBgn0029870	77.9427	122.714	86.8987	103.772	144.586	1.89178	2.08889	1.93901	2.01608	2.16013
lncRNA:CR44816	FBgn0266051	6.49162	6.1155	2.37709	3.05385	10.7026	0.812353	0.786432	0.376046	0.484848	1.02949
PpV	FBgn0003139	62.3281	36.5507	9.00537	11.6734	35.0922	1.79468	1.5629	0.954502	1.0672	1.54521
CG33664	FBgn0053664	0	0	0	0	0
CG33669	FBgn0053669	0.377169	3.36186e-14	14.6665	0	0	-0.423465	-13.4734	1.16633
CG33668	FBgn0053668	3.42483	1.13479	112.424	7.08049e-10	4.8265	0.534639	0.0549173	2.05086	-9.14994	0.683633
CG42340	FBgn0259242	26.2139	7.61575e-06	5.45968	0.0349915	5.05541	1.41853	-5.11829	0.737167	-1.45604	0.703756
CG33667	FBgn0053667	2.01513	1.70626	108.713	5.05621	1.61016e-08	0.304303	0.232046	2.03628	0.703825	-7.79313
CG33666	FBgn0053666	1.74073	0.000461632	183.294	4.87085	2.57208	0.240732	-3.3357	2.26315	0.687605	0.410284
CG33665	FBgn0053665	2.19794	2.43285	85.5736	2.24848	3.53967e-08	0.342016	0.386115	1.93234	0.35189	-7.45104
tRNA:Phe-GAA-1-1	FBgn0052748	0	0	0	0	0
CG3918	FBgn0029873	57.955	34.4513	24.4663	25.0757	34.4135	1.76309	1.53721	1.38857	1.39925	1.53673
CG3342	FBgn0029874	7.84526	8.56858	2.92342	5.1982	4.68954	0.894607	0.932909	0.465892	0.715853	0.67113
Agxt	FBgn0014031	2.23677	29.5717	1.53698	237.205	4.54092e-09	0.349622	1.47088	0.186669	2.37512	-8.34286
RpL7A	FBgn0014026	2851.87	3207.81	1163	2698.55	3381.86	3.45513	3.50621	3.06558	3.43113	3.52916
snoRNA:Or-CD10	FBgn0065071	0	0	0	0	0
dx	FBgn0000524	15.0683	20.7808	7.06544	19.3811	9.51557	1.17807	1.31766	0.849139	1.28738	0.978435
CG34417	FBgn0085446	0.00223957	75.4251	3.10454	227.995	183.501	-2.64984	1.87752	0.491997	2.35793	2.26364
CG17717	FBgn0029877	0.88394	7.74264e-05	91.8312	3.76934	4.09793	-0.0535772	-4.11111	1.96299	0.576265	0.612564
Pat1	FBgn0029878	145.347	114.283	25.8363	80.7599	79.6634	2.16241	2.05798	1.41223	1.9072	1.90126
lncRNA:CR43832	FBgn0264380	0.0555366	0	0	0	0	-1.25542
APC7	FBgn0029879	0.920101	7.83001	4.97085e-10	1.4556e-07	1.04378e-07	-0.0361643	0.893762	-9.30357	-6.83696	-6.98139
pigs	FBgn0029881	13.118	152.543	6.49571	173.227	298.546	1.11787	2.18339	0.812627	2.23861	2.47501
CG14443	FBgn0029880	10.1274	3.27779	4.09733	0.554958	6.75754e-07	1.0055	0.515581	0.612501	-0.25574	-6.17021
lncRNA:CR44817	FBgn0266052	0.250183	0.370991	0	0	0	-0.601743	-0.430637
CG3226	FBgn0029882	195.098	126.942	115.356	80.0062	62.0007	2.29025	2.10361	2.06204	1.90312	1.7924
Cdc7	FBgn0028360	24.3972	21.5213	98.7629	16.3314	28.6583	1.38734	1.33287	1.99459	1.21302	1.45725
CG3224	FBgn0029885	119.05	143.091	58.0091	71.5999	59.8357	2.07573	2.15561	1.7635	1.85491	1.77696
Ctr1A	FBgn0062413	3.98771	42.3388	2.69636	30.9762	3.13367	0.600724	1.62674	0.430778	1.49103	0.496054
CG3198	FBgn0029887	70.3533	70.8527	20.76	68.167	65.6665	1.84728	1.85036	1.31723	1.83357	1.81734
Mcm6	FBgn0025815	87.6811	36.2028	27.2372	17.2775	21.3804	1.94291	1.55874	1.43516	1.23748	1.33002
ND-ASHI	FBgn0029888	97.2256	178.009	129.465	121.31	86.5949	1.98778	2.25044	2.11215	2.0839	1.93749
Fum1	FBgn0286222	43.0379	162.312	23.7818	90.11	80.5234	1.63385	2.21035	1.37624	1.95477	1.90592
Fum2	FBgn0029890	0.239167	3.11717	101.625	4.67519	4.60449	-0.6213	0.493761	2.007	0.6698	0.663182
Pink1	FBgn0029891	68.3438	57.7295	104.404	88.3006	116.11	1.8347	1.7614	2.01872	1.94596	2.06487
CG44303	FBgn0265362	152.667	0.00148359	59.3436	9.91166	0.00873555	2.18374	-2.82869	1.77337	0.996146	-2.05871
CG3184	FBgn0029892	26.588	15.1603	7.99939	14.7064	13.0723	1.42469	1.18071	0.903057	1.16751	1.11635
CG14442	FBgn0029893	45.75	63.6225	12.7897	47.6186	59.5296	1.66039	1.80361	1.10686	1.67778	1.77473
CG14440	FBgn0029894	15.5554	8.41257	7.00106	6.30649	17.6896	1.19188	0.924929	0.845164	0.799788	1.24772
CG14441	FBgn0029895	66.7365	38.304	56.6933	44.1747	77.5312	1.82436	1.58324	1.75353	1.64517	1.88948
CG3168	FBgn0029896	9.30432e-05	175.413	0.003591	49.7079	267.005	-4.03132	2.24406	-2.44478	1.69643	2.42652
lncRNA:CR43461	FBgn0263415	18.326	2.29695	20.1831	8.29729	0.333185	1.26307	0.361151	1.30499	0.918936	-0.477315
RpL17	FBgn0029897	4674.42	5037.72	1878.78	3705.99	4198.54	3.66973	3.70223	3.27388	3.5689	3.6231
snoRNA:Psi28S-3436b	FBgn0086602	0.277051	0.718454	2.32671	5.59054	4.74996	-0.55744	-0.143601	0.366742	0.747454	0.67669
snoRNA:Psi28S-3436a	FBgn0086668	0.0858919	0.27805	0	0	0	-1.06605	-0.555877
snoRNA:Psi28S-1060	FBgn0083013	0.000610437	0.521914	0	0	6.37735	-3.21436	-0.282401			0.80464
snoRNA:Psi28S-1232	FBgn0082997	0	0.176762	0	0	0		-0.752612
tRNA:Phe-GAA-1-2	FBgn0052740	0	0	0	0	0
lncRNA:CR44895	FBgn0266200	0.635347	2.64133	8.28819	3.43119e-08	2.99322e-08	-0.196989	0.421823	0.91846	-7.46456	-7.52386
lncRNA:CR44964	FBgn0266279	0.239939	0.374941	0.757974	3.20037	0	-0.619899	-0.426038	-0.120345	0.5052
CG14439	FBgn0029898	0.463057	1.09543	1.00547	31.9626	1.50684e-09	-0.334365	0.0395858	0.00237092	1.50464	-8.82193
sov	FBgn0287725	101.816	80.6748	27.0623	35.771	51.7422	2.00781	1.90674	1.43236	1.55353	1.71384
lncRNA:CR43496	FBgn0263507	5.08509	6.75175	4.60825	3.58946	10.8279	0.706299	0.829416	0.663536	0.555029	1.03454
Coq7	FBgn0029502	86.5561	107.052	37.3665	51.9372	84.3879	1.9373	2.02959	1.57248	1.71548	1.92628
shf	FBgn0003390	1.00636	9.01451	0.113231	87.3494	2.99956e-08	0.00275463	0.954942	-0.946035	1.94126	-7.52294
C3G	FBgn0259228	34.7459	39.1894	24.8087	38.4439	96.8603	1.5409	1.59317	1.3946	1.58483	1.98615
pod1	FBgn0029903	55.3054	67.4476	13.3306	102.354	60.8236	1.74277	1.82897	1.12485	2.0101	1.78407
iav	FBgn0086693	0.104761	0.208717	0	0	0	-0.9798	-0.680442
Nf-YC	FBgn0029905	29.7368	19.8174	11.358	12.8333	20.7797	1.47329	1.29705	1.0553	1.10834	1.31764
xit	FBgn0029906	3.79345	9.51079	2.62352	8.05925	12.9395	0.579034	0.978217	0.418884	0.906295	1.11192
Atx-1	FBgn0029907	1.28185	1.30682	1.81288	14.1929	1.6728	0.107837	0.116215	0.258369	1.15207	0.223445
nonC	FBgn0263968	38.7458	20.811	27.1151	13.1402	14.5121	1.58822	1.31829	1.43321	1.1186	1.16173
mAChR-C	FBgn0029909	0	0	0	0	0
CG14435	FBgn0029911	13.3134	34.0941	7.96704	42.673	25.5361	1.12429	1.53268	0.901297	1.63015	1.40716
CG4557	FBgn0029912	10.4596	8.8116	9.05862	10.1299	8.09682	1.01951	0.945055	0.957062	1.00561	0.908314
Cht11	FBgn0029913	2.77797	2.89001	4.72266	10.4951	7.06946	0.443728	0.460899	0.674186	1.02099	0.849386
CG4558	FBgn0029914	5.65805	13.2128	3.239	7.77823	15.8821	0.752667	1.121	0.510411	0.890881	1.20091
CG14434	FBgn0029915	130.77	105.017	44.1391	64.6377	45.796	2.11651	2.02126	1.64482	1.81049	1.66083
lncRNA:CR45531	FBgn0267087	4.51585	11.298	1.05073	6.33801e-08	5.38557e-08	0.654739	1.053	0.0214929	-7.19805	-7.26877
CG43736	FBgn0263993	199.904	308.278	51.0134	276.02	246.658	2.30082	2.48894	1.70768	2.44094	2.3921
CG14431	FBgn0029922	0.490978	3.92407	1.88231	1.23259e-07	1.67217e-07	-0.308938	0.593737	0.274691	-6.90918	-6.77672
Setd3	FBgn0052732	17.6414	24.7669	7.30522	12.0956	21.3426	1.24653	1.39387	0.863633	1.08263	1.32925
CG4586	FBgn0029924	0.876881	4.25969	1.45347	6.04	4.49518	-0.0570593	0.629378	0.162407	0.781037	0.652747
CG3040	FBgn0029925	14.9506	20.4067	19.3635	17.3002	16.888	1.17466	1.30977	1.28698	1.23805	1.22758
ogre	FBgn0004646	0.780687	563.407	24.8175	324.381	11.0432	-0.107523	2.75082	1.39476	2.51105	1.04309
lncRNA:CR44084	FBgn0264893	0.123481	0.231722	0	0	0	-0.9084	-0.635033
bou	FBgn0261284	0.0199177	81.0568	0.0537895	81.2136	11.8523	-1.70076	1.90879	-1.2693	1.90963	1.0738
Inx7	FBgn0027106	4.13051e-07	11.5416	3.14212	0.187887	4.70364	-6.384	1.06227	0.497223	-0.726104	0.672434
lncRNA:CR43837	FBgn0264385	0.170612	8.49084	1.73972e-09	10.1994	3.96645e-08	-0.76799	0.928951	-8.75952	1.00857	-7.4016
Inx2	FBgn0027108	0.000156034	284.692	0.0035318	131.275	32.8952	-3.80678	2.45438	-2.452	2.11818	1.51713
cm	FBgn0000330	7.51289	12.5589	5.93357	17.3261	15.4085	0.875807	1.09895	0.773316	1.2387	1.18776
CG32736	FBgn0052736	0	0	0	0	0
CG42308	FBgn0259204	0	0	0	0	0
CG3032	FBgn0029928	3.18771	2.32821	2.26068	5.18525	2.84921	0.503479	0.367023	0.354239	0.714769	0.454725
CG4593	FBgn0029929	30.2169	52.4773	14.7703	26.5247	15.6984	1.48025	1.71997	1.16939	1.42365	1.19586
CG12541	FBgn0029930	8.42069	0.428906	1.94915	8.92911e-10	25.8232	0.925348	-0.367638	0.289845	-9.04919	1.41201
CG14427	FBgn0029931	0	0	0	0	0
nullo	FBgn0004143	0	0	0	0	0
CG4607	FBgn0029932	0.227926	0.847524	2.50493e-14	56.211	268.972	-0.642206	-0.071848	-13.6012	1.74982	2.42971
Sxl	FBgn0264270	36.9378	60.8318	14.1527	61.0333	83.085	1.56747	1.78413	1.15084	1.78557	1.91952
mir-4956	FBgn0263563	0	0	0	0	0
CG4615	FBgn0029935	4.91056	5.95817	2.02742	7.36964	10.9644	0.691131	0.775113	0.306944	0.867446	1.03999
CG4617	FBgn0029936	24.0813	12.0551	5.68818	6.89933	10.7132	1.38168	1.08117	0.754974	0.838807	1.02992
CG8300	FBgn0029937	63.2264	44.9116	21.0663	53.7494	31.2621	1.8009	1.65236	1.32359	1.73037	1.49502
fz4	FBgn0027342	14.9831	24.6751	6.34155	29.7978	48.6327	1.1756	1.39226	0.802195	1.47418	1.68693
lncRNA:CR45532	FBgn0267088	0.161714	0	1.66035	0	0	-0.791253		0.2202
lncRNA:CR46245	FBgn0267965	0.0555366	0	0	0	0	-1.25542
CG9650	FBgn0029939	21.2348	0.000115147	5.94732	7.05306e-05	12.7664	1.32705	-3.93875	0.774321	-4.15162	1.10607
lncRNA:CR32730	FBgn0047092	1.09861	2.08704e-08	9.05627e-09	1.51553e-08	2.25403e-08	0.0408454	-7.68047	-8.04305	-7.81944	-7.64704
lncRNA:CR44357	FBgn0265457	3.30337	0.00255384	1.02135e-08	4.52938e-11	1.08795e-11	0.518957	-2.59281	-7.99082	-10.344	-10.9634
CG1958	FBgn0029940	0.0376407	1.01852e-05	246.394	5.48826	0.0117745	-1.42434	-4.99203	2.39163	0.739435	-1.92906
CG1677	FBgn0029941	97.4584	68.2537	64.4198	58.6737	81.7028	1.98882	1.83413	1.80902	1.76844	1.91224
CG2059	FBgn0029942	24.9645	27.2118	45.1818	17.8397	11.8896	1.39732	1.43476	1.65496	1.25139	1.07517
unc-119	FBgn0025549	158.428	89.0743	151.826	82.4072	69.0812	2.19983	1.94975	2.18135	1.91597	1.83936
brk	FBgn0024250	16.1127	66.8042	0.00063409	65.1793	62.952	1.20717	1.8248	-3.19785	1.81411	1.79901
Atg5	FBgn0029943	9.03265	11.8919	6.39677	17.4339	7.27704	0.955815	1.07525	0.805961	1.2414	0.861955
Dok	FBgn0029944	35.1245	60.3348	15.6576	46.0139	39.6647	1.54561	1.78057	1.19472	1.66289	1.5984
Acsf3	FBgn0029945	6.73145	5.71997	129.141	8.03476	3.83997e-08	0.828109	0.757394	2.11106	0.904973	-7.41567
CG42780	FBgn0261848	0.978127	1.15849e-13	0	0	0	-0.00960497	-12.9361
CBP	FBgn0026144	94.6155	8.04422	32.3103	0.00955938	0.743841	1.97596	0.905484	1.50934	-2.01957	-0.12852
CG15034	FBgn0029946	5.94014	0.00844017	415.557	8.90205	4.63132	0.773797	-2.07365	2.61863	0.94949	0.665705
CG1999	FBgn0029947	4.54835	4.21385	324.02	10.6355	4.4427	0.657854	0.624679	2.51057	1.02676	0.647647
CheA7a	FBgn0029948	0.128442	0	3.50165	0	0	-0.891293		0.544273
CG42781	FBgn0261849	0.470032	0.542155	14.8565	1.20593	8.26038	-0.327873	-0.265877	1.17192	0.0813232	0.917
CG15035	FBgn0029949	2.39032	1.35807	82.126	3.30306	5.99329	0.378456	0.132923	1.91448	0.518916	0.777666
CG32727	FBgn0265265	1.67333	0.00417076	134.361	5.72809	12.5188	0.223582	-2.37978	2.12827	0.75801	1.09756
CG42246	FBgn0259098	0.210238	0.103816	0	0	1.70399	-0.677289	-0.983736			0.231467
CG42704	FBgn0261615	0.133832	0	0	2.61615	0	-0.87344			0.417663
CG42705	FBgn0261616	0.0434501	0.125702	0	0	0	-1.36201	-0.900658
CG34337	FBgn0085366	0	0	0	0	0
rumpel	FBgn0029950	0	0	0	0	0
CG15036	FBgn0040922	0	0	0	0	0
CG32726	FBgn0052726	0.150755	0	0	0	0	-0.821729
lncRNA:CR45533	FBgn0267089	0.102307	0.288857	0	0	0	-0.990097	-0.539317
lncRNA:CR43199	FBgn0262828	1.03787	6.84397	19.3784	1.30554e-09	7.96855e-10	0.0161449	0.835308	1.28732	-8.88421	-9.09862
CG11368	FBgn0040923	0.100635	0	1.59227	0	0	-0.997252		0.202015
CG43198	FBgn0262827	0.219487	0.0825762	20.1238	0.0599715	2.76741e-08	-0.658591	-1.08314	1.30371	-1.22206	-7.55793
lncRNA:CR44500	FBgn0265693	0.259318	0.191433	0.857342	0	0	-0.586167	-0.717983	-0.0668459
lncRNA:CR45534	FBgn0267090	0.0555366	0	0	0	0	-1.25542
lncRNA:CR43278	FBgn0262967	0.00179193	0.000699454	452.629	3.68555	5.47039	-2.74668	-3.15524	2.65574	0.566502	0.738018
lncRNA:CR43279	FBgn0262968	1.0335	5.97283e-05	99.6062	5.44163	6.94494	0.0143096	-4.22382	1.99829	0.735729	0.841669
lncRNA:CR43835	FBgn0264383	7.85325	4.05221	241.782	6.30833e-09	13.4865	0.895049	0.607692	2.38342	-8.20009	1.1299
CG32719	FBgn0052719	1.83959	0.00324464	81.2797	11.0714	4.0644	0.264722	-2.48883	1.90998	1.0442	0.608997
CG43138	FBgn0262612	4.62732	2.92928	186.291	3.28499	6.86516e-09	0.66533	0.466761	2.27019	0.516534	-8.16335
CG32720	FBgn0052720	5.48761	4.49358	128.012	3.75636e-09	4.26134	0.739383	0.652593	2.10725	-8.42523	0.629546
lncRNA:CR44501	FBgn0265694	0.156425	0.267422	0.440935	0	0	-0.805695	-0.572803	-0.355626
lncRNA:CR44502	FBgn0265695	0.109495	0.170059	0	0	0	-0.960605	-0.7694
CG11369	FBgn0029951	1.63496	0.626064	129.624	7.11845	5.01476	0.213508	-0.203381	2.11269	0.852386	0.700251
CG12689	FBgn0029952	2.30874	0.846757	206.766	3.64967	2.04933	0.363376	-0.0722412	2.31548	0.562254	0.311612
ct	FBgn0004198	2.35225	45.8051	2.11269	520.298	60.8098	0.371484	1.66091	0.324836	2.71625	1.78397
lncRNA:CR45667	FBgn0267227	3.39407	0.0308009	0.759839	2.57895e-09	3.91733e-09	0.53072	-1.51144	-0.119279	-8.58856	-8.40701
lncRNA:CR45666	FBgn0267226	0.758237	6.40929e-14	0	0	0	-0.120195	-13.1932
lncRNA:CR45665	FBgn0267225	4.78764	0.109902	0.258857	0.24627	6.5124e-08	0.680122	-0.958993	-0.58694	-0.608588	-7.18626
CHES-1-like	FBgn0029504	34.535	114.92	12.8234	61.6857	80.8698	1.53826	2.0604	1.108	1.79018	1.90779
lncRNA:CR43287	FBgn0262979	3.88153	1.04612	4.40546	3.12843	2.803	0.589003	0.0195827	0.643992	0.495326	0.447622
CG15478	FBgn0029955	0.102307	0	0	0	0	-0.990097
Hira	FBgn0022786	11.2963	7.43566	4.93756	4.27847	6.40622	1.05294	0.871319	0.693512	0.631288	0.806602
NELF-B	FBgn0027553	16.9582	4.29944	5.13917	5.35223	11.7725	1.22938	0.633412	0.710893	0.728535	1.07087
CG12155	FBgn0029957	31.4448	17.4641	14.9355	14.1625	11.3969	1.49755	1.24215	1.17422	1.15114	1.05679
Pdp	FBgn0029958	33.0707	9.75736	26.493	23.3061	10.7243	1.51944	0.989332	1.42313	1.36747	1.03037
Rab39	FBgn0029959	19.6798	32.0507	10.3879	30.2074	18.1084	1.29402	1.50584	1.01653	1.48011	1.25788
Tom40	FBgn0016041	72.4026	83.4254	57.379	35.7843	44.2409	1.85975	1.9213	1.75875	1.55369	1.64582
Ir7a	FBgn0029961	0	0	0	0	0
CG34338	FBgn0085367	0	0	0	0	0
CG32718	FBgn0052718	0.71477	0.576087	30.5395	7.80537	1.31239	-0.145834	-0.239512	1.48486	0.892393	0.118063
CARPA	FBgn0029962	0.25402	0	0	0	0	-0.595132
CG10920	FBgn0029963	0.00500806	1.6083e-06	179.692	6.02754	3.07836	-2.30033	-5.79363	2.25453	0.78014	0.48832
CG1409	FBgn0029964	0.0584464	2.61174e-05	43.9658	1.26822	4.63109	-1.23324	-4.58307	1.64311	0.103195	0.665683
Ir7b	FBgn0029965	3.17918e-14	1.01542	0	2.1162	4.7043	-13.4977	0.00664471		0.325557	0.672495
dec	FBgn0000427	5.99264e-10	12.4026	5.51371	22.2592	32.9221	-9.22238	1.09351	0.741444	1.34751	1.51749
asRNA:CR43615	FBgn0263590	0.75016	3.60777	24.5495	3.87043e-09	5.21325e-09	-0.124846	0.557239	1.39004	-8.41224	-8.28289
Ir7c	FBgn0029966	0	0.468083	1.95468	0	0		-0.329677	0.291076
Ir7d	FBgn0259190	0	0.197354	0	0	0		-0.704754
Ir7e	FBgn0259189	0	0.231722	0	0	0		-0.635033
Ir7f	FBgn0259188	0.0492265	0.250261	0	2.58319	0	-1.3078	-0.601607		0.412156
Ir7g	FBgn0029968	0	0	0	0	0
Acat1	FBgn0029969	4.50442	47.1318	5.69524	30.2911	13.7165	0.653638	1.67331	0.755512	1.48132	1.13724
Nek2	FBgn0029970	0.697339	7.31766	0.404046	3.58472	6.69136e-07	-0.156556	0.864372	-0.393569	0.554456	-6.17449
CG45089	FBgn0266490	0	0	0	0	0
ND-MNLL	FBgn0029971	5.44111	11.8816	3.86979	12.4582	10.033	0.735688	1.07487	0.587688	1.09545	1.00143
p115	FBgn0040087	29.5732	13.2947	7.60444	20.5428	16.6033	1.4709	1.12368	0.881067	1.31266	1.2202
RpS6	FBgn0261592	2124.32	2169.67	824.36	1722.61	2082.31	3.32722	3.33639	2.91612	3.23619	3.31855
snoRNA:Or-aca2	FBgn0082924	0	0	0	0	0
bys	FBgn0010292	61.0408	31.703	18.7678	26.6597	2.29882	1.78562	1.5011	1.27341	1.42586	0.361504
dpr14	FBgn0029974	9.94651	3.27754	0.29167	2.42157	6.528e-08	0.997671	0.515547	-0.535108	0.384097	-7.18522
spidey	FBgn0029975	39.3891	152.106	43.8391	89.3834	59.7332	1.59538	2.18215	1.64186	1.95126	1.77622
snz	FBgn0029976	13.557	48.6986	15.8573	15.1163	22.5249	1.13216	1.68752	1.20023	1.17944	1.35266
hdm	FBgn0029977	9.12365	0.088836	1.80214	1.10423e-08	1.1035e-08	0.960169	-1.05141	0.255787	-7.95694	-7.95723
Ykt6	FBgn0260858	33.8942	45.1852	24.4412	45.055	29.8742	1.53013	1.655	1.38812	1.65374	1.4753
mahe	FBgn0029979	1317.98	1.20745	386.689	56.404	245.675	3.11991	0.0818681	2.58736	1.75131	2.39036
Dhdds	FBgn0029980	19.6468	15.3368	7.60018	11.8463	7.0433	1.29329	1.18573	0.880824	1.07358	0.847776
RpS14a	FBgn0004403	1799.08	1677.39	793.207	1656.37	1855.24	3.25505	3.22463	2.89939	3.21916	3.2684
RpS14b	FBgn0004404	594.653	474.541	244.219	463.968	524.948	2.77426	2.67627	2.38778	2.66649	2.72012
Ubr3	FBgn0260970	119.145	104.734	118.883	74.4277	104.063	2.07608	2.02009	2.07512	1.87173	2.0173
orion	FBgn0027280	18.7615	256.407	17.4481	247.199	109.413	1.27327	2.40893	1.24175	2.39305	2.03907
CG15332	FBgn0029986	3.83599	0.000173912	9.83909	1.49535	5.36033	0.583878	-3.75967	0.992955	0.174744	0.729191
CG15330	FBgn0029987	10.932	5.06825	86.4753	2.05088	3.70513e-07	1.0387	0.704858	1.93689	0.311939	-6.4312
sws	FBgn0003656	24.4251	16.8129	95.2013	24.3044	20.745	1.38784	1.22564	1.97864	1.38569	1.31691
asRNA:CR45620	FBgn0267180	3.96888	2.01002	2.25958	0.00106168	5.01153	0.598668	0.303201	0.354027	-2.97401	0.69997
sn	FBgn0003447	86.4696	25.3684	23.4162	78.326	30.4934	1.93686	1.40429	1.36952	1.89391	1.48421
Tbh	FBgn0010329	9.7646	2.03932e-07	3.61178	4.43524	3.5726	0.989654	-6.69052	0.557722	0.646917	0.552985
CG15333	FBgn0029989	0.56283	2.5413e-05	36.0319	2.05998	4.33517	-0.249623	-4.59494	1.55669	0.313863	0.637006
CG2233	FBgn0029990	2.42546	7.73989	6.92363	161.892	9.57625	0.384795	0.888735	0.840334	2.20922	0.981195
fs(1)h	FBgn0004656	128.403	285.577	41.0245	162.126	255.811	2.10857	2.45572	1.61304	2.20985	2.40792
mys	FBgn0004657	34.4838	159.187	13.8455	247.591	263.978	1.53762	2.20191	1.14131	2.39374	2.42157
Upf2	FBgn0029992	32.7267	18.0072	32.9612	7.97192	18.5372	1.5149	1.25545	1.518	0.901563	1.26804
CG1571	FBgn0029993	3.27896	3.14679	123.592	1.58139	1.31406e-08	0.515736	0.497868	2.09199	0.19904	-7.88139
Ldsdh1	FBgn0029994	0.279381	0.359825	2.14993	17.3745	12.1762	-0.553804	-0.443909	0.332425	1.23991	1.08551
CG2256	FBgn0029995	0	0.134837	0	0	0		-0.870192
asRNA:CR45535	FBgn0267091	0	0	0	0	0
UbcE2H	FBgn0029996	26.966	176.972	17.7907	160.407	150.638	1.43082	2.2479	1.25019	2.20522	2.17793
CG2258	FBgn0029997	33.9983	30.2206	30.7144	7.40605	12.0276	1.53146	1.4803	1.48734	0.869587	1.08018
Gclc	FBgn0040319	9.94306	29.4269	7.24044	57.3614	55.5504	0.99752	1.46874	0.859765	1.75862	1.74469
CG1575	FBgn0029999	18.7554	11.8286	3.15998	13.0403	9.65332e-05	1.27313	1.07293	0.499684	1.11529	-4.01532
CG2260	FBgn0030000	33.318	25.0445	11.9216	10.5064	8.12258	1.52268	1.39871	1.07633	1.02145	0.909694
cyr	FBgn0030001	1.82735	3.64357	1.91859	3.3223e-07	2.78456e-07	0.261821	0.561528	0.282981	-6.47856	-6.55524
CG2116	FBgn0030003	22.3154	19.7225	6.11244	18.8514	15.6256	1.3486	1.29496	0.786215	1.27534	1.19384
CG10958	FBgn0030004	3.32131	2.98102	71.8628	3.7014	2.77473e-07	0.52131	0.474366	1.8565	0.568366	-6.55678
CG2120	FBgn0030005	0.101363	0.137542	7.76921e-13	0	6.4868	-0.994119	-0.861565	-12.1096		0.812031
Smox	FBgn0025800	156.837	124.88	55.9798	101.244	144.208	2.19545	2.09649	1.74803	2.00537	2.15899
CG17982	FBgn0030006	6.78509	28.3889	8.60009	11.9576	25.7253	0.831556	1.45315	0.934503	1.07765	1.41036
alpha-PheRS	FBgn0030007	64.6808	60.5968	22.9116	28.6791	50.5644	1.81078	1.78245	1.36006	1.45757	1.70385
CG2129	FBgn0030008	10.8846	7.93754	2.92579	6.95364	8.09292	1.03681	0.899686	0.466243	0.842212	0.908105
CG15336	FBgn0030009	0.102307	0.197138	0	0	0	-0.990097	-0.70523
CG10959	FBgn0030010	5.78369	2.73809	5.65649	0.00113611	4.58103	0.762205	0.437448	0.752547	-2.94458	0.660963
Gbeta5	FBgn0030011	14.3474	3.23166e-07	5.96319	0.0260668	50.442	1.15677	-6.49057	0.775479	-1.58391	1.70279
CG18262	FBgn0030012	21.7853	10.5199	11.2978	9.96848	0.0022197	1.33816	1.02201	1.05299	0.998629	-2.65371
Traf6	FBgn0265464	9.9274	7.98105	4.11612	10.2982	7.4496	0.996836	0.90206	0.614488	1.01276	0.872133
GIIIspla2	FBgn0030013	17.3054	14.2458	3.35703	11.8729	17.5403	1.23818	1.15369	0.525956	1.07456	1.24404
CG15337	FBgn0030014	1.86711	1.50182	95.632	2.02877e-09	3.35794e-09	0.271171	0.176619	1.9806	-8.69277	-8.47393
CG10761	FBgn0030015	1.34884	0.000242579	39.1151	3.22056	5.39192	0.12996	-3.61515	1.59234	0.507931	0.731743
lncRNA:CR45536	FBgn0267096	0	0	0	0	0
Or7a	FBgn0030016	0.0506657	0.229391	0	0	0	-1.29529	-0.639425
CG2278	FBgn0030017	4.37832	3.72841	3.84606	0.00129207	8.52969	0.641307	0.571524	0.585016	-2.88871	0.930933
slpr	FBgn0030018	85.1134	52.2948	40.9105	50.7414	71.6285	1.93	1.71846	1.61183	1.70536	1.85509
sdt	FBgn0261873	14.1399	34.6459	3.61404	58.9723	17.0933	1.15045	1.53965	0.557993	1.77065	1.23283
CG2147	FBgn0030025	69.6744	58.9315	122.116	54.6153	34.1355	1.84307	1.77035	2.08677	1.73731	1.53321
sni	FBgn0030026	45.0256	44.7514	14.3141	31.503	42.5165	1.65346	1.65081	1.15576	1.49835	1.62856
Trxr1	FBgn0020653	88.6349	87.7448	99.4625	109.317	85.2708	1.9476	1.94322	1.99766	2.03869	1.9308
ND-75	FBgn0017566	66.5219	87.8687	53.8995	48.4423	70.7876	1.82296	1.94383	1.73158	1.68523	1.84996
CG1632	FBgn0030027	1.12186	1.13307	0.702904	42.1579	6.49441e-11	0.0499405	0.0542563	-0.153104	1.62488	-10.1875
Corp	FBgn0030028	25.4451	1.23363	1.08452	0.506649	8.51655e-08	1.4056	0.0911853	0.0352381	-0.295292	-7.06974
CG15343	FBgn0030029	2.3526	4.3565	1.03423e-09	5.60551	1.66365e-08	0.371548	0.639137	-8.98538	0.748615	-7.77894
CG1636	FBgn0030030	20.69	26.0696	25.0608	14.0055	18.4789	1.31576	1.41613	1.399	1.1463	1.26668
nAChRalpha3	FBgn0015519	2.25352	2.82125	1.88243	3.34394	3.23505	0.352861	0.450442	0.274719	0.524259	0.509881
lncRNA:CR43695	FBgn0263778	1.95939e-08	0	5.59361	0	0	-7.70788		0.747692
CG1387	FBgn0030033	1.54254	0.281209	106.985	3.19306	0.160275	0.188237	-0.550971	2.02932	0.504208	-0.795133
CG10555	FBgn0030034	42.1187	81.1059	9.41758	48.6447	50.3381	1.62448	1.90905	0.973939	1.68704	1.7019
PIG-T	FBgn0030035	51.0726	71.7722	36.9711	71.1232	70.1295	1.70819	1.85596	1.56786	1.85201	1.8459
lawc	FBgn0262976	18.205	40.7196	5.77456	31.5293	38.4517	1.26019	1.6098	0.761519	1.49871	1.58492
Trf2	FBgn0261793	1145.42	250.029	324.775	162.291	434.276	3.05897	2.39799	2.51158	2.21029	2.63777
CG32712	FBgn0052712	0.0172259	0.000262668	3.11993	26.6154	4.16831	-1.76382	-3.58059	0.494145	1.42513	0.61996
Miga	FBgn0030037	31.7278	15.3766	22.5076	9.8879	10.7007	1.50144	1.18686	1.35233	0.995104	1.02941
CG1440	FBgn0030038	58.8173	60.3998	66.3821	57.6158	44.338	1.76951	1.78104	1.82205	1.76054	1.64678
CG12123	FBgn0030039	7.67321	10.2658	71.4202	11.0725	9.99198	0.884977	1.01139	1.85382	1.04425	0.999651
org-1	FBgn0021767	0.311239	0.208308	0	0	0	-0.506905	-0.681294
CG32713	FBgn0052713	2.64528	1.77239	145.733	5.98644	6.27258e-07	0.422471	0.248558	2.16356	0.777169	-6.20255
CG15347	FBgn0030040	2.28616	2.67882	9.24447	449.205	3.67705	0.359107	0.427943	0.965882	2.65244	0.565499
Es2	FBgn0023506	5.61556	5.28412	17.7235	6.19444	8.32407	0.749393	0.722973	1.24855	0.792002	0.920336
Sptr	FBgn0014032	1.44418	14.5957	1.94681	8.92069	11.7359	0.159622	1.16422	0.289323	0.950398	1.06952
CG33223	FBgn0053223	3.20041	0.240498	27.8055	2.4476e-09	3.24369e-09	0.505205	-0.618889	1.44413	-8.61126	-8.48896
CG12116	FBgn0030041	6.72329	1.6537	2.98197	2.89129	3.94187	0.827582	0.218458	0.474504	0.461092	0.595702
Cp7Fa	FBgn0014464	0.274139	0	0	2.58103	0	-0.562028			0.411793
Cp7Fb	FBgn0014465	1.76488	3.96149e-08	0.497237	2.49736e-08	3.33373e-08	0.246715	-7.40214	-0.303436	-7.60252	-7.47707
Cp7Fc	FBgn0014466	0	0.163038	0	2.61615	0		-0.787711		0.417663
Cp36	FBgn0000359	0.166606	0	0	0	0	-0.778309
Cp38	FBgn0000360	0.683643	0.244702	0	0	0	-0.165171	-0.611363
lncRNA:CR43834	FBgn0264382	0.280157	0	0	0	0	-0.552599
otu	FBgn0003023	27.9592	6.83322e-11	7.26866	0.60444	6.88768e-07	1.44652	-10.1654	0.861454	-0.218647	-6.16193
CG33181	FBgn0053181	38.2586	0.000341476	20.3936	0.000772564	8.3947	1.58273	-3.46664	1.30949	-3.11207	0.924005
Nrg	FBgn0264975	153.158	435.964	46.5541	452.038	227.595	2.18514	2.63945	1.66796	2.65518	2.35716
PIP82	FBgn0024943	0.0837001	0.40601	0	0	0	-1.07727	-0.391463
IntS4	FBgn0026679	15.2581	10.5406	5.33968	13.9386	7.71816	1.1835	1.02286	0.727515	1.14422	0.887514
CG12112	FBgn0030048	14.2877	37.0961	7.71272	30.1742	0.00156725	1.15496	1.56933	0.887208	1.47964	-2.80486
Trf4-1	FBgn0030049	76.2866	54.9222	19.5029	33.1145	63.0102	1.88245	1.73975	1.2901	1.52002	1.79941
asRNA:CR46195	FBgn0267914	1.0325	4.78019	2.58537e-12	238.306	14.026	0.0138906	0.679445	-11.5875	2.37714	1.14693
CG12111	FBgn0030050	2.81557	3.53089	17.529	761.228	6.29483	0.449567	0.547885	1.24376	2.88151	0.798984
spirit	FBgn0030051	0.150253	0	2.02342	8.78419	0	-0.823175		0.306086	0.943701
CG12065	FBgn0030052	14.2468	112.948	2.51338	118.028	101.023	1.15372	2.05288	0.400257	2.07198	2.00442
CG12081	FBgn0030053	25.1114	19.5102	13.1797	27.148	22.8218	1.39987	1.29026	1.1199	1.43374	1.35835
CG12659	FBgn0040929	19.0562	5.20971	9.91339	0.00178247	4.39751	1.28004	0.716814	0.996222	-2.74898	0.643207
Crag	FBgn0025864	54.2646	58.143	14.1731	68.6762	53.5633	1.73452	1.7645	1.15147	1.83681	1.72887
Caf1-180	FBgn0030054	70.3006	21.9177	7.49681	13.0666	16.6847	1.84696	1.3408	0.874877	1.11616	1.22232
oc	FBgn0004102	1.73712	16.6432	5.88649	36.7812	1.4367e-09	0.23983	1.22124	0.769857	1.56563	-8.84263
Rubicon	FBgn0030055	8.24058	6.67839	8.91331	8.862	9.51038	0.915958	0.824672	0.950039	0.947532	0.978198
CAH3	FBgn0030056	61.1941	122.34	12.908	54.6289	29.7149	1.78671	2.08757	1.11086	1.73742	1.47297
Ppt1	FBgn0030057	20.5483	92.4669	10.2943	72.102	35.0868	1.31277	1.96599	1.0126	1.85795	1.54514
Ogg1	FBgn0027864	7.29583	7.3099	2.16594	4.24819	6.3936	0.863075	0.863912	0.335645	0.628204	0.805746
CG11294	FBgn0030058	5.00118	1.79352	102.403	0.508306	1.66407e-08	0.699073	0.253707	2.01031	-0.293875	-7.77883
lncRNA:CR44507	FBgn0265700	1.28862e-05	0.464399	0	0	0	-4.88988	-0.333109
lncRNA:CR44508	FBgn0265701	0.0555366	0.236305	0	0	0	-1.25542	-0.626526
Hexo2	FBgn0041629	3.5192e-06	84.5388	3.71941	33.532	6.26415e-05	-5.45356	1.92706	0.570473	1.52546	-4.20314
CG2004	FBgn0030060	27.8013	40.1258	8.83523	36.7726	18.8496	1.44406	1.60342	0.946218	1.56552	1.2753
CG1785	FBgn0030061	72.9161	38.9041	18.0261	25.2901	22.5861	1.86282	1.59	1.2559	1.40295	1.35384
l(1)G0020	FBgn0027330	50.4737	20.9355	7.60419	8.90949e-05	13.4037	1.70306	1.32088	0.881053	-4.05015	1.12722
CG1789	FBgn0030063	91.2499	57.6399	30.5851	48.1413	46.1281	1.96023	1.76072	1.48551	1.68252	1.66397
lncRNA:CR43297	FBgn0262989	2.30819	1.94152	63.8856	1.07415e-08	1.92015	0.363272	0.288142	1.8054	-7.96894	0.283334
Lim1	FBgn0026411	0.0789314	0.134849	4.99048e-13	7.12077	4.87782e-12	-1.10275	-0.870151	-12.3019	0.852527	-11.3118
lncRNA:CR45537	FBgn0267097	1.7847	0.0335298	35.5809	2.05468e-09	1.17403e-08	0.251565	-1.47457	1.55122	-8.68726	-7.93032
CG12075	FBgn0030065	0.112353	3.12433	5.58309e-11	13.248	3.58599e-09	-0.949416	0.494757	-10.2531	1.12215	-8.44539
Moe	FBgn0011661	293.074	503.522	66.8865	471.282	386.239	2.46698	2.70202	1.82534	2.67328	2.58686
Uros1	FBgn0030066	17.3714	4.147	15.5504	0.001675	15.8857	1.23984	0.617734	1.19174	-2.77598	1.20101
Rbm13	FBgn0030067	46.9119	49.4482	8.15228	23.0117	0.00164203	1.67128	1.69415	0.911279	1.36195	-2.78462
e(r)	FBgn0011586	283.148	139.121	103.741	108.772	118.166	2.45201	2.14339	2.01595	2.03652	2.07249
rdgA	FBgn0261549	29.3741	32.1958	5.97524	17.0896	402.697	1.46797	1.5078	0.776356	1.23273	2.60498
lncRNA:CR44111	FBgn0264942	0.539928	1.12762	2.95226	2.10184	7.79372	-0.267664	0.0521631	0.470154	0.322601	0.891745
CG12661	FBgn0030071	2.62634	1.68112	24.2684	3.9512e-11	8.47123e-11	0.419351	0.225599	1.38504	-10.4033	-10.0721
CG43255	FBgn0262900	2.36591	4.71945	3.17509e-08	1.35517e-07	2.18681e-07	0.373999	0.673891	-7.49824	-6.86801	-6.66019
mir-4964	FBgn0263519	0	0	0	0	0
lncRNA:CR43836	FBgn0264384	1.89258	1.44709	1.0382	2.47543e-08	2.98204e-08	0.277053	0.160494	0.0162828	-7.60635	-7.52549
CG10962	FBgn0030073	0.13021	0.864507	0	0	4.6951	-0.885354	-0.0632317			0.671644
CG12662	FBgn0030074	0.204613	0.134837	0	0	0	-0.689067	-0.870192
mir-31b	FBgn0262369	0	0	0	0	0
Nost	FBgn0259734	5.59143	11.5477	2.77299	17.1463	10.2843	0.747523	1.06249	0.442949	1.23417	1.01218
CG15365	FBgn0030077	0.000360783	52.0486	0.821824	33.821	121.45	-3.44275	1.71641	-0.0852212	1.52919	2.0844
CG10970	FBgn0030078	0.528799	0.000364375	47.2708	2.7993	3.00905	-0.276709	-3.43845	1.67459	0.447049	0.478429
asRNA:CR45538	FBgn0267098	3.04563e-05	0.459739	5.6797	6.26992	4.69199	-4.51632	-0.337488	0.754326	0.797262	0.671357
CG44325	FBgn0265413	0.68385	439.327	30.0981	900.486	224.951	-0.165039	2.64279	1.47854	2.95448	2.35209
CG7246	FBgn0030081	26.3231	15.2492	7.42289	13.0743	6.80784	1.42034	1.18325	0.870573	1.11642	0.833009
HP1b	FBgn0030082	17.4595	50.5478	9.8208	30.7187	23.0067	1.24203	1.7037	0.992147	1.4874	1.36185
APC4	FBgn0052707	17.3221	6.75088	8.89395	6.43153	10.1273	1.2386	0.82936	0.949095	0.808314	1.00549
CG32708	FBgn0052708	43.374	21.1623	17.4336	16.1401	24.0602	1.63723	1.32556	1.24139	1.20791	1.3813
CG32706	FBgn0052706	27.4245	7.12072	16.0329	5.02428	15.5235	1.43814	0.852524	1.20501	0.701074	1.19099
CG6999	FBgn0030085	17.8159	4.0988	16.406	7.38123	14.1162	1.25081	0.612656	1.215	0.868129	1.14972
CCT2	FBgn0030086	226.306	201.794	85.2105	121.334	126.735	2.3547	2.30491	1.93049	2.08398	2.1029
mir-13b-2	FBgn0262421	0	0	0	0	0
CG7766	FBgn0030087	30.6407	39.9785	17.7415	46.2793	27.7451	1.4863	1.60183	1.24899	1.66539	1.44319
Bx42	FBgn0004856	57.6617	29.6732	21.8586	21.8065	28.2613	1.76089	1.47236	1.33962	1.33859	1.45119
Arfrp1	FBgn0030088	26.7122	12.3687	31.7782	14.6163	10.3692	1.42671	1.09232	1.50213	1.16484	1.01575
AP-1gamma	FBgn0030089	77.3239	97.8859	17.781	112.302	85.4617	1.88831	1.99072	1.24996	2.05039	1.93177
lncRNA:CR45539	FBgn0267099	0	0	0	0	0
fend	FBgn0030090	25.132	210.105	9.16644	98.1138	0.00720212	1.40023	2.32244	0.962201	1.99173	-2.14254
lncRNA:CR44517	FBgn0265710	0.574232	5.0373	1.07153e-08	1.49904e-07	1.15766e-07	-0.240913	0.702198	-7.96999	-6.82419	-6.93642
CG7065	FBgn0030091	50.6236	64.1063	18.3914	56.965	35.9168	1.70435	1.8069	1.26462	1.75561	1.5553
fh	FBgn0030092	16.0451	26.9114	14.7272	15.8246	13.7411	1.20534	1.42994	1.16812	1.19933	1.13802
Bap111	FBgn0030093	32.7018	32.4202	29.774	25.5838	31.1122	1.51457	1.51082	1.47384	1.40797	1.49293
His3.3B	FBgn0004828	1054.36	649.971	352.592	699.378	578.958	3.02299	2.81289	2.54727	2.84471	2.76265
Ost48	FBgn0014868	77.2745	81.4492	56.528	93.418	76.5765	1.88804	1.91089	1.75226	1.97043	1.8841
Dlip1	FBgn0040467	7.94155	9.9295	25.9119	13.1725	7.50606	0.899905	0.996927	1.4135	1.11967	0.875412
CG9034	FBgn0040931	306.335	387.953	199.344	281.791	216.752	2.4862	2.58878	2.2996	2.44993	2.33596
Zpr1	FBgn0030096	17.5717	11.5076	8.49621	11.7917	4.86513	1.24481	1.06098	0.929225	1.07157	0.687094
CG44532	FBgn0265725	23.475	1.44864e-07	0.722077	5.58004e-05	7.69326e-08	1.37061	-6.83904	-0.141417	-4.25336	-7.11389
mei-P26	FBgn0026206	405.4	41.0123	128.008	51.5838	160.799	2.60788	1.61291	2.10724	1.71251	2.20628
CG12115	FBgn0030097	0.0753774	0	0	0	0	-1.12276
CG12057	FBgn0030098	0.0753774	0	0	0	0	-1.12276
CG12056	FBgn0030099	12.2175	10.3345	6.39812	14.8535	12.5574	1.08698	1.01429	0.806053	1.17183	1.0989
CG12106	FBgn0030100	7.76496	6.26515	3.44841	9.02702	9.97083	0.890139	0.796932	0.537619	0.955544	0.998731
CG12118	FBgn0030101	23.2315	28.5176	204.75	26.0517	22.2541	1.36608	1.45511	2.31122	1.41584	1.34741
su(r)	FBgn0086450	0.934441	3.80656	0.717429	76.0271	2.29992e-08	-0.0294482	0.580532	-0.144221	1.88097	-7.63829
SmydA-9	FBgn0030102	8.79365e-14	3.88622e-13	0	0	173.827	-13.0558	-12.4105			2.24012
Obp8a	FBgn0030103	0.102307	0.134837	0	0	4.7043	-0.990097	-0.870192			0.672495
CG15368	FBgn0030104	0.881528	0.00023912	53.5948	0.00164815	6.49373	-0.054764	-3.62138	1.72912	-2.783	0.812495
CG15369	FBgn0030105	0	0	0	5.76349	0				0.760685
t	FBgn0086367	0.981736	1.03924	2.26866e-08	8.81872	4.69576e-08	-0.00800539	0.0167158	-7.64423	0.945405	-7.32829
CG15370	FBgn0030107	0	0.134837	0	0	0		-0.870192
Gr8a	FBgn0030108	0	0	0	0	0
CG12121	FBgn0030109	43.955	54.6058	26.6439	63.2855	30.7459	1.64301	1.73724	1.4256	1.8013	1.48779
Ir8a	FBgn0052704	0.511533	0	0	0	0	-0.291127
mir-4916	FBgn0263578	0	0	0	0	0
mxc	FBgn0260789	96.6367	18.3536	14.335	12.1733	20.8672	1.98514	1.26372	1.1564	1.08541	1.31946
Larp7	FBgn0260771	13.394	9.88409	4.69585	8.11711	7.84771	1.12691	0.994937	0.671714	0.909402	0.894743
amx	FBgn0000077	5.13824	13.1105	4.07663	9.02361	7.1666	0.710815	1.11762	0.610301	0.95538	0.855313
Dsor1	FBgn0010269	26.3893	13.9486	11.5974	8.43255	16.2337	1.42143	1.14453	1.06436	0.925959	1.21042
CG17754	FBgn0030114	8.82213	9.76891	24.0509	16.4212	17.3695	0.945573	0.989846	1.38113	1.21541	1.23979
ric8a	FBgn0028292	20.4843	21.7618	7.06137	8.99287	20.7649	1.31142	1.3377	0.848889	0.953898	1.31733
Erk7	FBgn0052703	2.55169	2.02774	194.111	5.22607	1.29643	0.406828	0.307012	2.28805	0.718175	0.112749
CG17440	FBgn0030120	2.74497	0.816332	18.6537	4.34916	4.24801	0.438537	-0.0881332	1.27077	0.638405	0.628185
Cfp1	FBgn0030121	20.9105	7.66665	15.8672	8.17536	10.7876	1.32036	0.884606	1.2005	0.912507	1.03292
Aladin	FBgn0030122	27.6612	12.8794	10.1626	0.0322228	11.8714	1.44187	1.1099	1.007	-1.49184	1.0745
snoRNA:CG16892-a	FBgn0263475	0	0	0	0	0
c11.1	FBgn0040236	17.5743	25.4021	4.41116	44.9859	41.1064	1.24488	1.40487	0.644553	1.65308	1.61391
lz	FBgn0002576	0.322508	0	0	0	0	-0.49146
lncRNA:CR44534	FBgn0265727	1.87161	0.608219	11.9215	3.34518	1.1711e-08	0.272216	-0.21594	1.07633	0.524419	-7.93141
c12.1	FBgn0040235	87.7918	56.1455	41.1366	31.2786	44.8714	1.94345	1.74932	1.61423	1.49525	1.65197
c12.2	FBgn0040234	4.09894	8.11703	1.09824	4.84299	13.444	0.612671	0.909397	0.0406983	0.685114	1.12853
Zdhhc8	FBgn0085478	30.7453	52.9301	34.9213	52.5982	43.1988	1.48778	1.7237	1.54309	1.72097	1.63547
CG34450	FBgn0085479	1.38003	0.000455375	98.2573	3.03052	9.34533	0.139888	-3.34163	1.99236	0.481518	0.970595
BCL7-like	FBgn0026149	51.3849	54.5459	9.45398	16.0057	14.7769	1.71084	1.73676	0.975615	1.20428	1.16958
mgl	FBgn0261260	0.976669	202.142	10.3911	395.893	87.7679	-0.0102526	2.30566	1.01666	2.59758	1.94334
CG44815	FBgn0266050	0.13177	0.657882	0	0	3.77701	-0.880185	-0.181852			0.577148
CG32700	FBgn0267253	3.22047	4.41666	28.2439	3.37763e-08	9.85367	0.50792	0.645094	1.45092	-7.47139	0.993598
CG34028	FBgn0054028	0	0	0	0	0
CG34026	FBgn0054026	0	0	0	0	0
l(1)G0320	FBgn0028327	42.8669	130.566	27.4712	114.075	110.595	1.63212	2.11583	1.43888	2.05719	2.04374
RpS28b	FBgn0030136	3561.87	3542.58	1426.2	2970.13	3133.57	3.55168	3.54932	3.15418	3.47277	3.49604
CG15317	FBgn0030137	15.7585	17.854	10.1007	13.3655	0.00120866	1.19752	1.25173	1.00435	1.12599	-2.9177
lncRNA:CR42767	FBgn0261835	6.53983	0.00299504	591.763	0.00116912	9.98123	0.815566	-2.5236	2.77215	-2.93214	0.999184
Cubn	FBgn0052702	0.162578	9.18407	0.284981	0.40368	6.7664	-0.788939	0.963035	-0.545183	-0.393963	0.830358
LPCAT	FBgn0052699	18.3964	59.5128	3.89146	49.3846	139.008	1.26473	1.77461	0.590112	1.69359	2.14304
CG42395	FBgn0259741	1.88632	0.662725	28.718	0.119151	2.98808	0.275616	-0.178667	1.45815	-0.923903	0.475393
lncRNA:CR45540	FBgn0267100	0.147833	0.0924029	3.09297	0	0	-0.830228	-1.03431	0.490375
lncRNA:CR45541	FBgn0267101	0	0.134837	0	0	0		-0.870192
Hex-A	FBgn0001186	59.3221	466.034	29.696	771.426	175.745	1.77322	2.66842	1.4727	2.88729	2.24488
lncRNA:CR45542	FBgn0267102	0.163812	0.0866223	3.50165	4.11319	4.50258	-0.785653	-1.06237	0.544273	0.614178	0.653461
lncRNA:CR45543	FBgn0267103	0.0472806	0.111974	0	5.79446	0	-1.32532	-0.950883		0.763013
Gga	FBgn0030141	17.14	19.2618	6.49578	21.3225	19.1578	1.23401	1.2847	0.812631	1.32884	1.28235
Lst8	FBgn0264691	39.7169	35.7282	11.6729	15.4339	19.0107	1.59897	1.55301	1.06718	1.18848	1.279
LysRS	FBgn0027084	84.3563	63.79	24.4961	36.1523	26.4304	1.92612	1.80475	1.3891	1.55814	1.4221
Hecw	FBgn0261931	15.02	8.08755	24.0963	6.51307	33.385	1.17667	0.907817	1.38195	0.813786	1.52355
Ptpmeg2	FBgn0028341	17.6083	43.6897	21.4345	37.3069	388.313	1.24572	1.64038	1.33111	1.57179	2.58918
CG3106	FBgn0030148	0.0510881	0.195035	0	2.02767	9.35662	-1.29168	-0.709888		0.306997	0.971119
nej	FBgn0261617	182.607	153.121	66.9636	116.371	149.013	2.26152	2.18503	1.82584	2.06584	2.17322
lncRNA:CR42657	FBgn0261522	1.87338	1.41272	131.362	4.34653	7.01066	0.272625	0.150056	2.11847	0.638143	0.845759
lncRNA:CR44016	FBgn0264786	0	0	2.80112	0	0			0.447332
btd	FBgn0000233	0.210238	0	0	0	0	-0.677289
lncRNA:CR43498	FBgn0263509	0.914973	0.237747	52.3175	8.70676e-11	1.51411e-10	-0.0385916	-0.623885	1.71865	-10.0601	-9.81984
Sp1	FBgn0020378	0.0555366	0	3.23034	0	0	-1.25542		0.509248
CG1354	FBgn0030151	60.4534	99.6881	47.4902	54.2341	47.2684	1.78142	1.99864	1.6766	1.73427	1.67457
CARPB	FBgn0052698	1.29412	1.60082	3.05937	7.62097	1.91263	0.111974	0.204342	0.485632	0.88201	0.281632
Ser7	FBgn0019929	0.282372	5.52829	1.61074e-10	215.699	4.33869e-09	-0.549178	0.742591	-9.79298	2.33385	-8.36264
CG45060	FBgn0266430	0	0	0	0	0
CG45061	FBgn0266431	0	0.213732	0	0	0		-0.670131
CG32695	FBgn0052695	4.02046e-08	0.982202	3.25823e-06	39.3664	8.64043	-7.39572	-0.00779924	-5.48702	1.59513	0.936536
CG15247	FBgn0030156	7.84851e-12	1.43674	1.75818	9.37771	18.4988	-11.1052	0.157378	0.245063	0.972097	1.26714
CG1468	FBgn0030157	2.9295	14.7187	2.06446	1068.76	7.60022e-11	0.466793	1.16787	0.314806	3.02888	-10.1192
CG9686	FBgn0030158	0.40251	21.5353	1.34756e-11	85.7987	1.82113e-09	-0.395224	1.33315	-10.8705	1.93348	-8.73966
CG9689	FBgn0030159	0.00117442	5.4175	9.19147	236.393	0.00169589	-2.93018	0.733799	0.963385	2.37363	-2.7706
CG9691	FBgn0030160	1.05766e-06	194.841	12.8028	563.571	0.0132196	-5.97565	2.28968	1.10731	2.75095	-1.87878
CG15249	FBgn0030161	0	0	1.59234	0	0			0.202035
CG1986	FBgn0030162	0.204613	0	0	0	0	-0.689067
Idgf4	FBgn0026415	0.736936	1.45005	1.55682	83.0972	12.6654	-0.13257	0.161383	0.192238	1.91959	1.10262
snoRNA:Me28S-U1688	FBgn0086044	0	0	0	0	0
CG1791	FBgn0030163	0	0	0	0	0
CG1889	FBgn0030164	0.102307	0.197138	2.5416	0	0	-0.990097	-0.70523	0.405108
CG43386	FBgn0263216	0	0	3.27761	0	0			0.515557
CG15252	FBgn0030167	0.102307	0	0	0	0	-0.990097
CG32694	FBgn0052694	0.114555	0.133587	0	17.2905	0	-0.940988	-0.874235		1.23781
CG33557	FBgn0053557	0.337114	0.897901	6.08514e-12	69.7333	672.224	-0.472223	-0.0467717	-11.2157	1.84344	2.82751
Dna2	FBgn0288690	8.92885	2.31674	3.71836	4.50916	11.9554	0.950795	0.364877	0.570352	0.654096	1.07756
Cht6	FBgn0263132	1.32845	0.557784	2.34737	4.53858	3.53573	0.123346	-0.253534	0.370581	0.65692	0.548479
asRNA:CR45185	FBgn0267495	1.44461	2.55591	1.28623e-08	7.08091	6.04979e-08	0.15975	0.407545	-7.89068	0.850089	-7.21826
Yp2	FBgn0005391	0.387376	0.196367	1.97087	0	0	-0.411867	-0.706931	0.294658
Yp1	FBgn0004045	0.182691	0.279474	0	0	0	-0.738283	-0.553659
asRNA:CR45601	FBgn0267161	0	0	0	0	0
CG15312	FBgn0030174	16.5651	0.000355512	6.82271	3.46534e-05	4.48766	1.21919	-3.44915	0.833957	-4.46025	0.65202
Gr9a	FBgn0052693	0.102307	0	0	0	0	-0.990097
lncRNA:CR45602	FBgn0267162	0.379237	0.00287204	1.97087	0	0	-0.421089	-2.54181	0.294658
ZAP3	FBgn0052685	70.1071	77.1068	44.089	52.211	33.9761	1.84576	1.88709	1.64433	1.71776	1.53117
CG2972	FBgn0030177	22.8451	21.7922	9.18457	16.6494	13.7248	1.35879	1.3383	0.963059	1.2214	1.13751
Naxe	FBgn0030178	15.022	6.1638	12.9423	8.61673	9.11796	1.17673	0.789848	1.11201	0.935343	0.959898
RhoU	FBgn0083940	20.8248	2.44367	3.47687	6.2008	54.6526	1.31858	0.388042	0.541188	0.792448	1.73761
asRNA:CR44894	FBgn0266199	3.55696	0.153263	1.03887	2.83087e-08	9.16813e-08	0.551078	-0.814562	0.016562	-7.54808	-7.03772
snoRNA:Me18S-A627	FBgn0086045	0.150755	0	0	0	0	-0.821729
CG12645	FBgn0030181	2.11422	4.05971	6.18515	18.6836	1.9959e-09	0.325151	0.608495	0.79135	1.27146	-8.69986
CG43902	FBgn0264503	4.23007	12.7477	3.01027e-07	1.49611e-06	1.23057e-06	0.626348	1.10543	-6.5214	-5.82504	-5.90989
lncRNA:CR32690	FBgn0052690	0.990751	0.000306737	696.506	12.8679	14.5943	-0.00403532	-3.51323	2.84293	1.10951	1.16418
Ypel	FBgn0030183	57.5658	20.1784	44.2075	23.0873	48.2735	1.76016	1.30489	1.6455	1.36337	1.68371
lncRNA:CR43899	FBgn0264500	10.1513	0.555535	1.21732	0.562781	2.28717e-07	1.00652	-0.255289	0.085403	-0.24966	-6.6407
ATPsyndelta	FBgn0028342	263.1	508.821	104.332	282.596	210.355	2.42012	2.70657	2.01842	2.45117	2.32295
CG2962	FBgn0030186	0.140199	0.315797	1.97087	0	0	-0.853256	-0.500592	0.294658
asRNA:CR45629	FBgn0267189	0.0555366	0.288857	0	0	0	-1.25542	-0.539317
CG15308	FBgn0040941	0	0	0	0	0
CG34408	FBgn0085437	6.86063	10.818	3.13943	13.8213	28.1636	0.836364	1.03415	0.49685	1.14055	1.44969
CG2961	FBgn0030187	0.210238	0	0	0	0	-0.677289
Hk	FBgn0263220	5.57514	0.218349	2.9469	8.3666	49.9971	0.746256	-0.660849	0.469366	0.922549	1.69895
asRNA:CR43959	FBgn0264674	0.144487	0	3.18325	0	0	-0.840172		0.502871
CG12643	FBgn0040942	0.19481	13.5911	3.29021	47.4441	40.9756	-0.710389	1.13326	0.517224	1.67618	1.61253
alpha-Man-Ia	FBgn0259170	51.1826	87.9575	6.59093	43.1559	79.6964	1.70912	1.94427	0.818946	1.63504	1.90144
CG2909	FBgn0030189	9.95117	5.57411	7.66764	6.17478	4.34269	0.997874	0.746176	0.884661	0.790621	0.637759
Gip	FBgn0011770	23.2794	31.1174	11.8312	25.8841	31.1805	1.36697	1.493	1.07303	1.41303	1.49388
CG15306	FBgn0030191	4.25625	0.00664076	314.772	7.10789	5.5607	0.629028	-2.17778	2.498	0.851741	0.745129
CG43740	FBgn0263997	0.0208155	4.06944e-08	0	0	26.2133	-1.68161	-7.39047			1.41852
snoRNA:U3:9B	FBgn0065046	0.389916	0.288857	0	2.46181e-13	0	-0.409029	-0.539317		-12.6087
l(1)G0289	FBgn0028331	31.6255	196.063	21.3926	112.631	72.5395	1.50004	2.2924	1.33026	2.05166	1.86057
CG32679	FBgn0052679	10.4168	0.536466	1.14671	1.36198	9.49935e-08	1.01774	-0.270458	0.059453	0.13417	-7.02231
CG17841	FBgn0028480	18.4104	28.2013	9.16044	45.8207	52.2982	1.26506	1.45027	0.961916	1.66106	1.71849
CG32686	FBgn0052686	1.30607	0.284189	65.718	5.17931	4.23425	0.115967	-0.546393	1.81768	0.714272	0.626777
CG2898	FBgn0030195	0.000455494	0.240405	55.4613	2.56886	1.28638e-13	-3.34152	-0.619057	1.74399	0.409741	-12.8906
CG32681	FBgn0052681	1.41888	7.79815	71.7897	1.37198e-09	1.23481e-09	0.151947	0.891991	1.85606	-8.86265	-8.9084
Psf3	FBgn0030196	36.4024	33.483	14.6729	23.1941	8.08869	1.56113	1.52482	1.16652	1.36538	0.907878
flw	FBgn0000711	72.3983	79.0208	11.7205	176.335	1160.08	1.85973	1.89774	1.06895	2.24634	3.06449
CG32683	FBgn0052683	0.510932	2.51619	1.85648	2.1213e-08	2.56156e-08	-0.291637	0.400744	0.26869	-7.6734	-7.5915
RabX2	FBgn0030200	0.484549	0.121622	20.8553	0.023859	1.74843e-10	-0.314662	-0.914989	1.31922	-1.62235	-9.75735
CG12640	FBgn0030202	0	0	0	0	0
snoRNA:Me28S-A1705	FBgn0086046	0	0	0	0	0
Or9a	FBgn0030204	0.213379	0.493157	0	0	0	-0.670848	-0.307015
Neb-cGP	FBgn0083167	538.199	1076.29	274.832	669.21	506.942	2.73094	3.03193	2.43907	2.82556	2.70496
nocte	FBgn0261710	213.657	166.656	46.9453	103.762	135.312	2.32972	2.22182	1.67159	2.01604	2.13134
CG2889	FBgn0030206	18.4315	11.5105	11.7816	15.5627	18.5653	1.26556	1.0611	1.0712	1.19209	1.2687
CG2887	FBgn0030207	14.3411	1.58182e-10	18.4512	0.000105739	5.24942	1.15658	-9.80084	1.26602	-3.97577	0.720111
PPP4R2r	FBgn0030208	53.233	61.1167	0.00416342	40.7468	39.5612	1.72618	1.78616	-2.38055	1.61009	1.59727
CG32687	FBgn0052687	8.05445e-09	41.9532	2.87663e-07	35.7496	0.774014	-8.09396	1.62277	-6.54112	1.55327	-0.111251
spri	FBgn0085443	10.5473	58.138	4.05178	65.07	27.6953	1.02314	1.76446	0.607646	1.81338	1.44241
CG15296	FBgn0030215	0.933305	0.000468954	98.8569	0.000197215	3.74954	-0.0299763	-3.32887	1.99501	-3.70506	0.573978
Rab9D	FBgn0067052	0.102307	0	0	0	0	-0.990097
Hmr	FBgn0001206	30.698	7.74325	10.1807	7.28422	0.00397941	1.48711	0.888923	1.00778	0.862383	-2.40018
CG2124	FBgn0030217	9.2344	5.32056	3.52189	3.35889	4.83309	0.965409	0.725957	0.546776	0.526195	0.684225
CG1628	FBgn0030218	0.0417094	36.2757	45.5257	8.90138	19.4907	-1.37977	1.55962	1.65826	0.949457	1.28983
CG43347	FBgn0263072	2.12577	2.92636	23.5299	6.19346	4.4631e-08	0.327517	0.466328	1.37162	0.791934	-7.35036
Rab9Db	FBgn0030221	0.0892641	0.220698	1.56966	0	0	-1.04932	-0.656201	0.195805
CG9806	FBgn0030222	0.103583	0.172141	0	0	0	-0.984712	-0.764115
X11Lbeta	FBgn0052677	17.3957	0.0298355	4.19882	1.85941	10.0829	1.24044	-1.52527	0.623127	0.269376	1.00359
CG2111	FBgn0030223	0.235904	0.135952	0	0	0	-0.627264	-0.866616
Rab9E	FBgn0052673	0.050348	0.176151	0	2.61615	6.46473	-1.29802	-0.754114		0.417663	0.810551
CG12637	FBgn0030224	5.61469	6.71554	260.899	3.08973	3.67114e-08	0.749326	0.827081	2.41647	0.489921	-7.4352
stx	FBgn0052676	101.424	121.037	82.746	127.918	137.853	2.00614	2.08292	1.91775	2.10693	2.13942
ras	FBgn0003204	40.0395	69.1101	14.2445	33.8698	45.2955	1.60249	1.83954	1.15365	1.52981	1.65606
lncRNA:CR44766	FBgn0265987	4.21933	1.51157	2.29955	1.35405	4.13371	0.625243	0.179427	0.361643	0.131635	0.61634
Rph	FBgn0030230	5.64504	1.81997	3.40215	8.1189e-08	1.78847	0.751667	0.260065	0.531753	-7.0905	0.252481
Tango5	FBgn0052675	18.4929	95.0451	51.6719	39.7236	16.6431	1.267	1.97793	1.71325	1.59905	1.22123
Atg8a	FBgn0052672	269.285	458.629	129.205	530.809	683.969	2.43021	2.66146	2.11128	2.72494	2.83504
BTBD9	FBgn0030228	15.2949	11.2135	87.6351	6.9095	0.00417056	1.18455	1.04974	1.94268	0.839446	-2.37981
CG15211	FBgn0030234	0.00407886	0.884349	0.27642	67.5184	30.4168	-2.38946	-0.0533763	-0.558431	1.82942	1.48311
Ant2	FBgn0025111	271.612	0.000984424	479.57	18.4905	0.0147644	2.43395	-3.00682	2.68085	1.26695	-1.83078
sesB	FBgn0003360	305.533	1416.01	177.301	908.631	979.654	2.48506	3.15107	2.24871	2.95839	2.99107
Imp	FBgn0285926	392.023	307.793	404.569	204.726	435.86	2.59331	2.48826	2.60699	2.31117	2.63935
lncRNA:CR45204	FBgn0266731	0	0	0	0	0
lncRNA:CR45624	FBgn0267184	0.210238	0	0	0	0	-0.677289
sbr	FBgn0003321	42.3985	96.4576	55.0087	49.9025	42.8548	1.62735	1.98434	1.74043	1.69812	1.632
CG15210	FBgn0040850	0.232442	2.96869	3.75046	314.085	5.6509	-0.633685	0.472565	0.574084	2.49705	0.752117
CG15209	FBgn0030237	5.44783e-11	11.6742	1.26237	22.4509	11.9809	-10.2638	1.06723	0.101186	1.35123	1.07849
CG32669	FBgn0052669	0.150888	0.959432	0	0	0	-0.821345	-0.0179856
Pgls	FBgn0030239	35.9831	46.85	25.3087	57.6357	15.5401	1.5561	1.67071	1.40327	1.76069	1.19145
CG2202	FBgn0030240	3.41017	5.96459	8.51697	9.34522	6.43799	0.532776	0.775581	0.930285	0.970589	0.80875
feo	FBgn0030241	129.684	63.4146	43.1378	42.6843	23.3688	2.11289	1.80219	1.63486	1.63027	1.36864
sofe	FBgn0030242	7.04847	5.44979	88.9291	3.78661	3.48954	0.848095	0.73638	1.94904	0.578251	0.542769
CG2186	FBgn0030243	15.3275	34.4242	4.40922	25.9407	30.9036	1.18547	1.53686	0.644362	1.41398	1.49001
CG2157	FBgn0030244	0.0555366	0.288857	0	8.70608	0	-1.25542	-0.539317		0.939823
CG1637	FBgn0030245	8.44882	32.2178	6.58678	54.4497	39.1857	0.926796	1.5081	0.818673	1.736	1.59313
Ork1	FBgn0017561	0.199774	0	6.55514	0	0	-0.699462		0.816582
lncRNA:CR45616	FBgn0267176	0	0	0	0	0
lncRNA:CR45617	FBgn0267177	0.300307	0.148623	0	0	0	-0.522434	-0.827914
lncRNA:CR44524	FBgn0265717	0.0555366	0	0	0	0	-1.25542
CG1582	FBgn0030246	23.1979	13.7216	38.831	15.3997	14.8442	1.36545	1.1374	1.58918	1.18751	1.17156
CG15208	FBgn0030247	1.90269	3.24598e-07	149.555	3.53391	4.37932	0.279368	-6.48865	2.1748	0.548255	0.641407
CG43901	FBgn0264502	0.625015	0	0	2.43308	0	-0.20411			0.386157
v	FBgn0003965	1.40515	3.25388	0.662707	121.335	3.45207e-10	0.147724	0.512401	-0.178678	2.08399	-9.46192
CG2145	FBgn0030251	1.59104	3.22666	0.265911	313.553	8.29885e-11	0.201682	0.508753	-0.575264	2.49631	-10.081
Myo10A	FBgn0263705	5.77118e-05	0.899183	0	5.79446	0	-4.23874	-0.0461518		0.763013
Rab9Fa	FBgn0052671	0.0910898	0	4.34079	0	0	-1.04053		0.637568
Rab9Fb	FBgn0052670	2.09654	1.43544	76.66	4.91787e-10	6.44746e-10	0.321504	0.156985	1.88457	-9.30822	-9.19061
C901	FBgn0021742	0	0	0	0	0
CG42339	FBgn0259241	0.102307	0	1.59234	0	0	-0.990097		0.202035
SmydA-4	FBgn0030257	1.36716	0.715934	0.597664	1.79833e-10	131.014	0.13582	-0.145127	-0.223543	-9.74513	2.11732
CG1552	FBgn0030258	0	0.134837	0	0	0		-0.870192
CG1545	FBgn0030259	0	0	0	0	0
CG1537	FBgn0030260	0	0	0	0	9.53865					0.979487
lncRNA:CR45614	FBgn0267174	0	0	0	0	0
CG15203	FBgn0030261	0	0.221875	0	3.58921	4.76933		-0.653891		0.554999	0.678457
sev	FBgn0003366	4.38264e-11	56.6916	2.21863	14.0654	2.67456e-07	-10.3583	1.75352	0.346084	1.14815	-6.57275
asRNA:CR44358	FBgn0265458	9.89694e-05	0.0169945	61.2369	2.11547	5.77345	-4.0045	-1.76969	1.78701	0.325407	0.761435
asRNA:CR45604	FBgn0267164	0.886214	8.15391	3.92883	0.0251728	0.572285	-0.0524614	0.911366	0.594264	-1.59907	-0.242388
Vago	FBgn0030262	0.000184258	175.956	8.31168	31.6781	0.013501	-3.73457	2.2454	0.919689	1.50076	-1.86964
CG2076	FBgn0030263	62.827	60.5012	73.1121	65.4112	34.2782	1.79815	1.78176	1.86399	1.81565	1.53502
CG2061	FBgn0027498	11.3377	6.35679	76.5593	4.03608	6.82958	1.05453	0.803238	1.884	0.60596	0.834394
CG42249	FBgn0259101	0.210238	0.134837	1.97087	0	0	-0.677289	-0.870192	0.294658
Hsp60A	FBgn0015245	189.35	171.391	167.007	111.758	57.5261	2.27727	2.23399	2.22273	2.04828	1.75987
CG11122	FBgn0030266	56.4938	48.8376	65.375	46.5687	37.0764	1.752	1.68875	1.81541	1.66809	1.5691
Rpt3	FBgn0028686	95.7078	114.444	29.6244	99.3473	87.8773	1.98095	2.05859	1.47165	1.99716	1.94388
SrpRalpha	FBgn0010391	99.6652	64.7642	44.4018	58.8295	49.4343	1.99854	1.81134	1.6474	1.7696	1.69403
Klp10A	FBgn0030268	108.081	50.5532	98.5861	35.8854	35.4877	2.03375	1.70375	1.99382	1.55492	1.55008
CG44385	FBgn0265535	0.0410771	0.00196568	47.8581	2.18892	3.95885	-1.3864	-2.70649	1.67996	0.340231	0.597569
CDK2AP1	FBgn0030269	36.0222	41.2334	7.93144	33.7051	0.168044	1.55657	1.61525	0.899352	1.5277	-0.774576
asRNA:CR44054	FBgn0264863	0.664792	0.427721	0	0	2.15641	-0.177315	-0.36884			0.333731
ssp7	FBgn0052667	10.3471	38.0049	1.58855	1314.69	5.15753e-09	1.01482	1.57984	0.201001	3.11882	-8.28756
CG15199	FBgn0030270	0.118349	0.128925	0	4.33715	0	-0.926836	-0.889664		0.637204
CG15202	FBgn0030271	0.63146	2.12884	2.28331	0.739228	4.96053	-0.199654	0.328144	0.358564	-0.131222	0.695528
CG15201	FBgn0030272	1.04167	5.2721	1.07858e-11	274.445	45.6771	0.0177289	0.721984	-10.9671	2.43846	1.6597
Ran	FBgn0020255	628.407	386.431	343.116	244.07	207.081	2.79824	2.58707	2.53544	2.38751	2.31614
Lint-1	FBgn0030274	9.51177	15.4053	21.5098	10.0063	6.15857	0.978261	1.18767	1.33264	1.00027	0.78948
rtv	FBgn0261277	0.681041	0.438937	0.626771	2.62524	1.65257e-08	-0.166827	-0.357598	-0.202891	0.41917	-7.78184
Dlic	FBgn0030276	57.7462	96.8205	23.0112	110.531	51.0187	1.76152	1.98597	1.36194	2.04348	1.70773
CG32668	FBgn0052668	0.161254	0.134837	0	0	0	-0.79249	-0.870192
Antdh	FBgn0026268	0	0	0	0	0
CG1394	FBgn0030277	11.5174	0.159055	1350.32	27.7085	0.655704	1.06135	-0.798454	3.13044	1.44261	-0.183292
CG15200	FBgn0030278	4.94528	0.0188521	568.607	16.1345	0.00203683	0.694191	-1.72464	2.75481	1.20776	-2.69105
lncRNA:CR44765	FBgn0265986	0.482178	0.564811	16.27	3.91176e-08	3.46796e-08	-0.316793	-0.248097	1.21139	-7.40763	-7.45993
CG11106	FBgn0030280	6.95564	0.0393474	755.643	22.5781	4.29625	0.842337	-1.40508	2.87832	1.35369	0.63309
CG44422	FBgn0265595	1.55016e-14	0.0956295	1.82966	4.1832e-07	205.169	-13.8096	-1.01941	0.262369	-6.37849	2.31211
CG15198	FBgn0030283	4.39227	5.40772	319.158	10.3651	15.4898	0.642689	0.733015	2.50401	1.01558	1.19005
Ir10a	FBgn0083979	0.0618586	0	0	0	6.54394	-1.2086				0.815839
sisA	FBgn0003411	0	0	0	0	0
l(1)10Bb	FBgn0001491	58.8312	46.1	65.3048	34.934	22.7904	1.76961	1.6637	1.81494	1.54325	1.35775
Gapvd1	FBgn0030286	13.2459	12.9414	3.10929	9.15266	15.4607	1.12208	1.11198	0.492661	0.961547	1.18923
Kap3	FBgn0028421	5.83575	7.75963	5.24035	7.48139	11.0403	0.766097	0.889841	0.719361	0.873982	1.04298
CG34348	FBgn0085377	8.4378	20.0567	2.6471	15.9646	6.92809	0.926229	1.30226	0.422771	1.20316	0.840613
GCS1	FBgn0030289	9.88355	11.287	14.2651	6.40512	24.8358	0.994913	1.05258	1.15427	0.806527	1.39508
CG11756	FBgn0030290	1.42902	0.998245	71.7323	1.1002	3.51007	0.15504	-0.000763027	1.85571	0.0414709	0.545316
CG1738	FBgn0030291	34.2277	15.9904	10.046	8.94823	19.2177	1.53438	1.20386	1.00199	0.951737	1.2837
CG11752	FBgn0030292	187.952	228.538	57.2742	136.696	117.307	2.27405	2.35896	1.75796	2.13575	2.06932
CG1737	FBgn0030293	110.112	60.824	24.1212	51.2855	40.3321	2.04183	1.78407	1.3824	1.70999	1.60565
dsh	FBgn0000499	39.8897	36.6804	71.3616	46.9887	33.1787	1.60086	1.56443	1.85346	1.67199	1.52086
Pa1	FBgn0287454	83.6329	18.4549	20.7117	17.7209	29.0299	1.92238	1.26611	1.31622	1.24849	1.46285
hop	FBgn0004864	22.7865	24.8055	8.94741	28.3516	24.4961	1.35768	1.39455	0.951697	1.45258	1.3891
Tim8	FBgn0027359	152.312	301.735	333.86	112.155	57.6675	2.18273	2.47963	2.52356	2.04982	1.76093
dlg1	FBgn0001624	157.356	208.765	35.0429	51.3851	361.623	2.19688	2.31966	1.5446	1.71084	2.55826
CG15196	FBgn0030296	9.26323e-05	1.15263	53.7002	4.59001	4.48618	-4.03324	0.061691	1.72998	0.661813	0.651877
Gr10b	FBgn0030297	0	0	0	0	0
Gr10a	FBgn0045502	0	0	0	0	0
Or10a	FBgn0030298	0	0	0	0	0
Gs2	FBgn0001145	0.0106554	2.24477	1.4066	34.584	4.0427	-1.97243	0.351171	0.148169	1.53888	0.606671
Evi5	FBgn0262740	51.4956	31.9024	26.6016	42.6598	65.0271	1.71177	1.50382	1.42491	1.63002	1.81309
Sk1	FBgn0030300	0.410374	20.2363	5.91308e-10	84.1653	19.3417	-0.38682	1.30613	-9.22819	1.92513	1.2865
HP5	FBgn0030301	56.5367	26.7446	11.0041	23.8698	16.742	1.75233	1.42724	1.04155	1.37785	1.22381
CG43155	FBgn0262685	0.282948	0.102262	1.8823	0	4.67592	-0.548294	-0.990286	0.274688		0.669867
Cyp4g15	FBgn0030304	0.0469713	0.134693	0	4.03053	4.61986	-1.32817	-0.870655		0.605363	0.664629
Uba5	FBgn0030305	39.2899	32.1641	22.9573	20.3322	19.4488	1.59428	1.50737	1.36092	1.30819	1.28889
Spase25	FBgn0030306	93.5317	124.017	67.472	120.58	67.6779	1.97096	2.09348	1.82912	2.08128	1.83045
CG33235	FBgn0030307	3.02268	3.30723	61.0355	4.91958	2.87568	0.480392	0.519465	1.78558	0.691928	0.45874
lncRNA:CR44556	FBgn0265749	0.153028	0	0	0	0	-0.815228
Drak	FBgn0052666	55.9335	70.7557	12.3808	147.316	40.2559	1.74767	1.84976	1.09275	2.16825	1.60483
mir-2492	FBgn0262335	0	0	0	0	0
CG1572	FBgn0030309	4.77246e-09	82.3357	7.72263	786.314	1073.77	-8.32126	1.91559	0.887765	2.8956	3.03091
PGRP-SA	FBgn0030310	0.418118	0.908197	2.28444	36.1649	6.46812	-0.378701	-0.0418201	0.358779	1.55829	0.810778
Polr2A	FBgn0003277	276.375	262.342	58.2047	192.879	145.362	2.4415	2.41887	1.76496	2.28528	2.16245
asRNA:CR44266	FBgn0265252	0.858372	0.909421	38.8684	0.713144	8.28653e-09	-0.0663246	-0.0412348	1.5896	-0.146823	-8.08163
CG11699	FBgn0030311	162.134	151.716	65.0006	99.6748	121.402	2.20987	2.18103	1.81292	1.99859	2.08423
Kmn1	FBgn0027259	17.1051	15.282	2.90192	0.00216216	14.7738	1.23313	1.18418	0.462686	-2.66511	1.16949
Reepl1	FBgn0030313	3.64978	1.56574	196.349	5.08002e-05	5.86561	0.562267	0.194719	2.29303	-4.29413	0.768313
CG11696	FBgn0030314	14.6261	8.93559	6.58861	5.42289	5.89501	1.16513	0.951123	0.818794	0.734231	0.770485
e(y)2	FBgn0000618	65.3607	62.0658	28.2327	57.6149	47.3812	1.81532	1.79285	1.45075	1.76053	1.67561
CG11695	FBgn0030316	21.0198	9.56379	10.4066	10.1746	16.1926	1.32263	0.98063	1.01731	1.00752	1.20932
lncRNA:roX2	FBgn0019660	2.43999	1261.18	17.6453	1606.46	1403.17	0.387389	3.10078	1.24663	3.20587	3.14711
nod	FBgn0002948	4.17265	6.21792	1.22224	4.02555	4.42764	0.620412	0.793645	0.0871552	0.604825	0.646172
pkm	FBgn0030317	2.27302e-14	0.232471	0	5.07453	0	-13.6434	-0.63363		0.705396
rho-4	FBgn0030318	25.1497	124.359	14.3462	40.486	30.5038	1.40053	2.09468	1.15674	1.6073	1.48435
CG2533	FBgn0030319	2.67574	2.50206	216.241	8.67106	11.504	0.427445	0.398299	2.33494	0.938072	1.06085
CG2247	FBgn0030320	87.4232	46.9307	48.2012	23.8926	27.2737	1.94163	1.67146	1.68306	1.37826	1.43574
CG1703	FBgn0030321	125.185	75.3326	80.5247	63.9014	80.5413	2.09755	1.87698	1.90593	1.80551	1.90602
RPA3	FBgn0288833	178.571	73.987	58.5183	32.7212	32.3112	2.25181	1.86916	1.76729	1.51483	1.50935
Met	FBgn0002723	38.734	47.5207	15.0497	61.6596	56.2851	1.58809	1.67688	1.17753	1.79	1.75039
Ptp10D	FBgn0004370	53.9114	95.1587	35.9131	138.364	213.198	1.73168	1.97845	1.55525	2.14102	2.32878
Vlet	FBgn0030323	6.36327	7.80371	11.3491	9.93962	17.4242	0.803681	0.892301	1.05496	0.99737	1.24115
bif	FBgn0014133	32.085	130.174	12.0867	137.299	165.872	1.5063	2.11453	1.08231	2.13767	2.21977
PhKgamma	FBgn0011754	42.3001	45.1205	65.1021	52.5909	84.4988	1.62634	1.65437	1.81359	1.72091	1.92685
CG2444	FBgn0030326	2.40239e-08	2.37498e-13	0	5.2323	0	-7.61936	-12.6243		0.718693
FucT6	FBgn0030327	7.14573	10.4462	2.53789	11.0871	17.9748	0.854046	1.01896	0.404473	1.04482	1.25466
Amun	FBgn0030328	206.639	101.453	92.3554	110.214	113.261	2.31521	2.00627	1.96546	2.04224	2.05408
mir-9370	FBgn0283637	0	0	0	0	0
lncRNA:CR45618	FBgn0267178	0.279871	0.0168784	0	0	0	-0.553042	-1.77267
prtp	FBgn0030329	20.348	41.5849	80.3135	49.6109	52.6048	1.30852	1.61894	1.90479	1.69558	1.72103
Tango10	FBgn0030330	23.6177	13.079	15.1849	11.6526	15.0351	1.37324	1.11657	1.18141	1.06642	1.17711
CG15221	FBgn0030331	0.102307	0	0	0	0	-0.990097
inaF-B	FBgn0259918	0	0	0	0	0
inaF-D	FBgn0260812	11.4941	1.05684	1.09861	3.30259e-07	49.9832	1.06048	0.0240078	0.040845	-6.48114	1.69882
inaF-A	FBgn0085351	0	0	0	0	0
inaF-C	FBgn0085350	0	0	0	0	0
m	FBgn0002577	0.668886	1.89511	0.755926	19.936	1.67954e-07	-0.174648	0.277635	-0.121521	1.29964	-6.77481
CG9360	FBgn0030332	1.28506	40.4061	1.57644	17.1442	1.39108e-06	0.108923	1.60645	0.197677	1.23412	-5.85665
dy	FBgn0004511	0.12237	0	0	0	0	-0.912326
Karl	FBgn0030334	1.36119	0.000286453	1.51796	10.5875	12.8105	0.133919	-3.54295	0.181261	1.0248	1.10757
asRNA:CR44962	FBgn0266277	1.62684	3.5535e-10	2.09014	1.82593	6.4868	0.211345	-9.44934	0.320175	0.261485	0.812031
CkIIbeta	FBgn0000259	93.3822	132.6	84.6908	75.1294	50.0523	1.97026	2.12254	1.92784	1.87581	1.69942
Hsc70-3	FBgn0001218	132.897	267.067	142.397	327.445	155.851	2.12351	2.42662	2.1535	2.51514	2.19271
CG1578	FBgn0030336	48.612	63.7187	14.6794	46.227	55.2154	1.68674	1.80427	1.16671	1.6649	1.74206
rudhira	FBgn0266019	118.548	133.5	38.4646	149.484	113.443	2.07389	2.12548	1.58506	2.17459	2.05478
CG15741	FBgn0030338	0	0	0	0	0
asRNA:CR43908	FBgn0264509	0	0.231722	0	0	0		-0.635033
Cyp28c1	FBgn0030339	0.183604	0.230277	1.97087	0	0	-0.736118	-0.637749	0.294658
CG15740	FBgn0030340	0	0.197138	0	0	0		-0.70523
lncRNA:CR45619	FBgn0267179	0.210238	0	0	0	0	-0.677289
p24-1	FBgn0030341	27.2132	41.8486	25.5959	55.0014	16.5145	1.43478	1.62168	1.40817	1.74037	1.21787
CG10347	FBgn0030342	6.7221	8.04124	15.8471	4.64359e-06	5.46074	0.827505	0.905323	1.19995	-5.33315	0.737251
ATP7	FBgn0030343	7.59468	8.8112	33.1442	25.5207	14.3909	0.88051	0.945035	1.52041	1.40689	1.15809
Nrd1	FBgn0030344	57.5144	30.1957	28.3111	21.592	27.6285	1.75978	1.47994	1.45196	1.33429	1.44136
CG1847	FBgn0030345	15.309	10.1937	10.7639	5.69199	17.4923	1.18495	1.00833	1.03197	0.755264	1.24285
BORCS5	FBgn0030346	10.3706	8.62798	13.4043	9.70712	12.7156	1.0158	0.935909	1.12725	0.98709	1.10434
CG15739	FBgn0030347	1.48702	9.63655	2.04802	26.6556	4.16843	0.172317	0.983922	0.311335	1.42579	0.619973
CG10352	FBgn0030348	0.108707	0.279388	3.16218	14.2869	4.66733	-0.963744	-0.553792	0.499986	1.15494	0.669068
CG10353	FBgn0030349	14.9832	28.1941	5.42754	53.0486	68.2649	1.1756	1.45016	0.734603	1.72467	1.8342
SelG	FBgn0030350	38.0652	46.36	12.894	59.6928	81.1865	1.58053	1.66614	1.11039	1.77592	1.90948
CG1840	FBgn0030351	10.024	18.2053	56.5012	37.5384	27.6682	1.00104	1.2602	1.75206	1.57448	1.44198
sicily	FBgn0030352	33.3281	25.9676	16.7641	15.5516	8.77376	1.52281	1.41443	1.22438	1.19178	0.943186
wisp	FBgn0260780	3.56013	7.27588e-09	5.66234	4.51125	5.8081	0.551465	-8.13811	0.752996	0.654296	0.764034
Upf1	FBgn0030354	60.6281	36.717	68.945	26.5499	31.6975	1.78267	1.56487	1.8385	1.42406	1.50102
CG43156	FBgn0262686	0.0916657	0.230593	0	2.54159	0	-1.03779	-0.637154		0.405105
pot	FBgn0250871	0.752234	2.41274	0.269265	53.4342	1.53644e-07	-0.123647	0.382511	-0.569821	1.72782	-6.81348
lncRNA:CR32661	FBgn0030356	4.10054	0.194335	457.024	11.0816	4.54848	0.612841	-0.711449	2.65994	1.0446	0.657867
lncRNA:CR43157	FBgn0262687	7.63601	0.00201384	850.33	14.9934	15.1842	0.882867	-2.69597	2.92959	1.1759	1.18139
Sclp	FBgn0030357	3.49426e-06	8.41164	6.63997	7.97158	115.081	-5.45664	0.924881	0.822166	0.901544	2.061
lncRNA:CR32660	FBgn0052660	0	0	0	0	0
CG10362	FBgn0030358	0.131838	0	0	2.2982	0	-0.879959			0.361387
cac	FBgn0263111	42.5084	13.3726	6.67285	50.7317	8.63478	1.62847	1.12621	0.824311	1.70528	0.936251
gd	FBgn0000808	3.87267	0.0234595	2.73549	4.92511	6.4868	0.588011	-1.62968	0.437035	0.692416	0.812031
tsg	FBgn0003865	0	0	0	0	0
CG18130	FBgn0030359	5.58493	3.17042	166.038	1.59151	4.41638e-08	0.747018	0.501117	2.22021	0.201811	-7.35493
fw	FBgn0001083	1.13277	1.31111e-10	6.33532e-12	5.77888e-11	7.92836e-11	0.0541428	-9.88236	-11.1982	-10.2382	-10.1008
CG1806	FBgn0030360	0.853559	0.45844	2.59557e-11	9.84424	324.557	-0.0687665	-0.338718	-10.5858	0.993182	2.51129
CG1492	FBgn0030361	4.63861	3.11212	2.53741	4.59279	3.85626	0.666388	0.493057	0.404391	0.662076	0.586166
regucalcin	FBgn0030362	4.12796	2.4982	3.98633	65.7351	17.1632	0.615735	0.397627	0.600574	1.8178	1.2346
Chrac-16	FBgn0043001	10.5423	39.8426	13.6464	30.7896	11.411	1.02294	1.60035	1.13502	1.4884	1.05732
Lsm12a	FBgn0030364	130.346	99.2245	40.7987	58.9341	83.2221	2.1151	1.99662	1.61065	1.77037	1.92024
Tango4	FBgn0030365	50.6127	29.6036	13.1346	17.7231	15.0502	1.70426	1.47134	1.11842	1.24854	1.17754
Usp7	FBgn0030366	366.046	175.803	336.494	153.01	259.478	2.56354	2.24503	2.52698	2.18472	2.4141
Cyp311a1	FBgn0030367	0.245766	0.122349	1.51838	2.59839	4.52069	-0.609478	-0.912401	0.181381	0.414704	0.655205
Cyp318a1	FBgn0030369	0.354086	0	0	0	0	-0.450891
Ten-a	FBgn0267001	6.5614	111.328	5.18639	162.842	165.505	0.816996	2.04661	0.714866	2.21177	2.21881
lncRNA:CR43960	FBgn0264675	0.276553	0.17131	0	0	0	-0.558221	-0.766218
Uch-L5R	FBgn0030370	2.11163	3.85377	117.048	1.96753e-09	2.51483e-09	0.324619	0.585885	2.06836	-8.70608	-8.59949
Muc11A	FBgn0052656	0.308399	1.07221e-13	3.50094	0	0	-0.510888	-12.9697	0.544185
lncRNA:CR43961	FBgn0264676	20.263	3.74965e-11	7.12679	1.6069e-14	7.74705	1.3067	-10.426	0.852894	-13.794	0.889136
CG34323	FBgn0085352	160.045	0.00055366	44.171	8.44559	3.5864e-05	2.20424	-3.25676	1.64514	0.92663	-4.44534
moon	FBgn0030373	23.6822	2.54811e-10	7.04245	8.03543e-05	16.6528	1.37442	-9.59378	0.847724	-4.09499	1.22149
CG15734	FBgn0030374	1.52804	0.00583604	107.657	4.86251	5.80702	0.184136	-2.23388	2.03204	0.68686	0.763953
lncRNA:CR32657	FBgn0052657	5.32037	0.0163608	639.241	7.6415	2.01645	0.725942	-1.7862	2.80566	0.883178	0.304588
lncRNA:CR32658	FBgn0040859	8.83852	0.0102482	1098.46	16.1139	8.87317	0.946379	-1.98935	3.04079	1.2072	0.948079
CG11356	FBgn0030375	0	0	0	0	0
CG2750	FBgn0030376	1.64836	0.000246193	90.9205	3.44742	8.50747	0.217052	-3.60872	1.95866	0.537494	0.929801
CG1924	FBgn0030377	0.31637	0.363336	13.0135	4.96674	5.40875	-0.499805	-0.439691	1.11439	0.696071	0.733097
CG32655	FBgn0052655	3.38228	3.62778	241.146	5.23509	11.1229	0.529209	0.559641	2.38228	0.718924	1.04622
CG45603	FBgn0267163	2.22282	0.939494	224.764	3.72828	2.17359	0.346904	-0.0271059	2.35173	0.571508	0.337177
CG2577	FBgn0030384	0.000121287	0.575079	40.9431	7.05155	4.46799	-3.91619	-0.240273	1.61218	0.848285	0.650112
Ir11a	FBgn0030385	0	0	0	0	0
CG32651	FBgn0052651	1.68097	0.000403411	222.347	3.2176	4.87104	0.225561	-3.39425	2.34703	0.507532	0.687622
CG2574	FBgn0030386	0.00142344	3.06606e-07	133.784	5.45516	2.29698	-2.84666	-6.51342	2.1264	0.736807	0.361158
lncRNA:CR32652	FBgn0052652	8.09961	0.00222333	1252.57	17.8741	0.00319326	0.908464	-2.653	3.0978	1.25222	-2.49577
Pkcdelta	FBgn0287828	4.68981	0.179987	1.19851e-14	2.52146	700.655	0.671155	-0.744759	-13.9214	0.401653	2.8455
CG15927	FBgn0030389	0	0.207033	3.18467	0	0		-0.68396	0.503065
lncRNA:CR45615	FBgn0267175	0	0	0	0	0
CG15731	FBgn0030390	0.0710195	0.107092	0	0	0	-1.14862	-0.970245
Rab40	FBgn0030391	32.0488	30.8666	7.94896	26.3456	23.3522	1.50581	1.48949	0.90031	1.42071	1.36833
CG42258	FBgn0259143	23.1561	8.65852	14.4557	57.6292	218.205	1.36467	0.937444	1.16004	1.76064	2.33886
Cpr11A	FBgn0030394	1.28351e-05	0.743043	0	9.85023	0	-4.8916	-0.128986		0.993446
Lsp1alpha	FBgn0002562	0	0	0	0	0
Mks1	FBgn0030395	0.461861	1.3533e-14	1.96806	0	0	-0.335489	-13.8686	0.294039
CG2556	FBgn0030396	10.3492	0.00112038	3.29357	22.9035	108.292	1.01491	-2.95064	0.517667	1.3599	2.0346
snoRNA:Me18S-G894	FBgn0086047	0	0.134837	0	0	0		-0.870192
hwt	FBgn0264542	5.55508	0.858631	4.16173	7.06441	13.1654	0.744691	-0.0661933	0.619274	0.849076	1.11944
Cpr11B	FBgn0030398	0	0.231722	0	0	0		-0.635033
Pits	FBgn0030400	252.717	158.898	177.571	197.191	310.333	2.40263	2.20112	2.24937	2.29489	2.49183
LIMK1	FBgn0283712	26.2232	16.9257	63.3458	20.2082	20.2725	1.41869	1.22855	1.80172	1.30553	1.30691
CG1824	FBgn0030403	19.5324	16.9891	8.3428	15.0983	10.8068	1.29076	1.23017	0.921312	1.17893	1.0337
Sec16	FBgn0052654	38.4661	36.687	16.1853	28.097	45.6134	1.58508	1.56451	1.20912	1.44866	1.65909
CG1463	FBgn0030406	11.5604	17.687	1.47965	13.0084	4.84407	1.06297	1.24765	0.170159	1.11422	0.68521
Fpgs	FBgn0030407	3.79718	5.81577	2.5082	11.2132	1.22063e-06	0.579461	0.764608	0.399362	1.04973	-5.91341
asRNA:CR45621	FBgn0267181	0.210238	0.231722	0	0	0	-0.677289	-0.635033
CG11085	FBgn0030408	0	0	0	0	0
lncRNA:CR44568	FBgn0265761	0.280197	0	0	0	0	-0.552537
CG15728	FBgn0030409	1.93699	2.6089	18.7689	138.323	3.16717	0.287128	0.416457	1.27344	2.14089	0.500672
Aven	FBgn0030410	7.14198	7.64112	12.8533	4.22307	7.06489	0.853818	0.883157	1.10901	0.625628	0.849106
CG2540	FBgn0030411	5.43856	4.42598	3.34307	4.70162	3.86265	0.735484	0.64601	0.524145	0.672248	0.586886
Tomosyn	FBgn0030412	21.3579	38.0991	10.0281	64.6756	24.9156	1.32956	1.58091	1.00122	1.81074	1.39647
mir-970	FBgn0262187	0	0	0	0	0
CkIalpha	FBgn0015024	94.1371	206.892	51.9012	209.136	236.364	1.97376	2.31574	1.71518	2.32043	2.37358
Tis11	FBgn0011837	179.721	554.983	81.4372	423.361	126.788	2.2546	2.74428	1.91082	2.62671	2.10308
lncRNA:CR33963	FBgn0053963	13.8656	58.0681	5.20596	31.7486	9.26525	1.14194	1.76394	0.716501	1.50172	0.966857
mir-9377	FBgn0283559	0	0	0	0	0
lncRNA:SMRG	FBgn0286868	0	0	0	0	0
Smr	FBgn0265523	472.878	503.674	96.6656	377.487	410.234	2.67475	2.70215	1.98527	2.5769	2.61303
CG15725	FBgn0030417	0.928852	11.4415	4.39363e-08	2.43944e-07	4.86779	-0.0320536	1.05848	-7.35718	-6.61271	0.687332
lncRNA:CR43963	FBgn0264678	25.3987	0.000369954	7.44367	0.956769	6.71206	1.40481	-3.43185	0.871787	-0.0191928	0.826856
asRNA:CR45623	FBgn0267183	0.164415	0.255229	1.97087	0	4.62485	-0.784059	-0.59307	0.294658		0.665098
CG4004	FBgn0030418	56.7825	24.6199	10.5721	21.3541	17.5589	1.75421	1.39129	1.02416	1.32948	1.2445
lncRNA:CR44619	FBgn0265830	2.40461	0.000575545	2.45048	2.29607	4.56664	0.381044	-3.23992	0.389251	0.360985	0.659597
Paics	FBgn0020513	33.7388	86.2083	13.9473	135.331	0.0144021	1.52813	1.93555	1.14449	2.1314	-1.84157
pira	FBgn0030420	2.11135	9.29157	1.79343	8.97469	1.84988	0.324559	0.968089	0.253685	0.95302	0.267144
Agpat1	FBgn0030421	25.8848	6.92102e-08	6.06522	0.0681349	4.68975e-06	1.41304	-7.15983	0.782846	-1.16663	-5.32885
CG32647	FBgn0052647	0.538757	1.22803	0.952331	34.9536	11.9779	-0.268607	0.0892102	-0.0212121	1.54349	1.07838
Pde9	FBgn0259171	34.2363	178.056	7.82848	44.9648	25.7476	1.53449	2.25056	0.893677	1.65287	1.41074
Nep6	FBgn0030425	1.08347	3.22581	0.786288	41.1634	6.21669e-20	0.0348181	0.508638	-0.104418	1.61451	-19.2064
CG4661	FBgn0030429	0.655663	6.76653	177.626	4.62291	16.9758	-0.183319	0.830366	2.24951	0.664915	1.22983
CG32650	FBgn0052650	6.82208	3.38049	282.464	4.01461	5.44974e-08	0.833917	0.528979	2.45096	0.603643	-7.26362
Coq8	FBgn0052649	14.5963	19.2722	4.67331	12.7978	12.9641	1.16424	1.28493	0.669625	1.10714	1.11274
CG4407	FBgn0030431	30.1139	18.8797	11.9122	11.2369	19.291	1.47877	1.27599	1.07599	1.05065	1.28535
CG4404	FBgn0030432	8.14598	0.261005	1.36881	58.4693	82.539	0.910943	-0.58335	0.136343	1.76693	1.91666
mRpL49	FBgn0030433	123.225	82.8713	40.9571	51.2611	52.4983	2.0907	1.9184	1.61233	1.70979	1.72015
Brms1	FBgn0030434	26.4065	15.6267	18.1354	15.5649	16.9851	1.42171	1.19387	1.25853	1.19215	1.23007
CG4645	FBgn0030435	13.647	14.969	9.95981	19.8288	16.6858	1.13504	1.17519	0.998251	1.2973	1.22235
lncRNA:CR45625	FBgn0267185	1.22857	0.75058	4.76868	0	10.4095	0.0894012	-0.124603	0.678398		1.01743
lncRNA:CR45626	FBgn0267186	0	0	0	0	0
fne	FBgn0086675	0.562941	0.00196149	2.47527	5.23137	0	-0.249537	-2.70741	0.393623	0.718616
hec	FBgn0030437	0.167716	0.554687	0	0	9.18074	-0.775426	-0.255952			0.962878
CG32642	FBgn0052642	0	0	0	0	0
Mur11Da	FBgn0052644	0	0	0	4.92511	0				0.692416
asRNA:CR43636	FBgn0263627	0.120918	0	2.40254	0	0	-0.917509		0.380671
CG15721	FBgn0030438	0	0	0	0	0
asRNA:CR43152	FBgn0262682	0.565596	0.64886	93.7576	2.06509	4.90958	-0.247494	-0.187849	1.97201	0.31494	0.691045
CG12716	FBgn0030439	0.210238	0	0	0	0	-0.677289
CG32643	FBgn0052643	1.00632	0.00101745	126.455	3.93841	3.60012	0.00273543	-2.99249	2.10193	0.595321	0.556317
rad	FBgn0265597	0.272827	0.482312	0.250078	9.45267e-09	1.04307e-08	-0.564112	-0.316672	-0.601924	-8.02445	-7.98169
CG15719	FBgn0030440	0.232528	6.47285e-05	32.5653	0.880258	4.03869	-0.633524	-4.1889	1.51276	-0.0553901	0.606241
CG2209	FBgn0030441	1.14734e-05	0.000174439	78.9471	2.26416	9.19767	-4.94031	-3.75836	1.89734	0.354907	0.963678
CG12715	FBgn0030443	0	0	0	0	0
asRNA:CR44840	FBgn0266114	0.0753774	0	0	0	0	-1.12276
mir-971	FBgn0262222	0	0	0	0	0
hep	FBgn0010303	35.6111	49.9406	11.9199	68.3733	62.7595	1.55159	1.69845	1.07627	1.83489	1.79768
lic	FBgn0261524	41.9237	26.6397	14.2601	18.5786	29.361	1.62246	1.42553	1.15412	1.26901	1.46777
CG2200	FBgn0030447	3.15662	44.1926	5.59869	41.1687	28.1624	0.499222	1.64535	0.748086	1.61457	1.44967
Chpf	FBgn0263005	49.3353	34.2103	9.73331	22.2292	87.7794	1.69316	1.53416	0.988261	1.34692	1.94339
Fer3HCH	FBgn0030449	1.50824	0.00143959	82.9132	1.40405	3.10092	0.17847	-2.84176	1.91862	0.147382	0.491491
CG42237	FBgn0250862	1.25692	2.2099	1.25892e-08	9.13912e-08	1.20949e-07	0.0993084	0.344373	-7.9	-7.0391	-6.9174
CG32638	FBgn0052638	3.7016	7.85622	9.13331	36.7303	4.83282	0.568389	0.895214	0.960628	1.56502	0.6842
sncRNA:204	FBgn0065101	0	0	0	0	0
CG15717	FBgn0030451	15.0432	35.2396	4.91308	14.4834	8.29445	1.17734	1.54703	0.691354	1.16087	0.918787
MFS10	FBgn0030452	0.327448	2.78943	0.522717	5.06772	9.3933	-0.484857	0.445515	-0.281733	0.704813	0.972818
CG32645	FBgn0052645	0.506123	0.346785	0.172481	5.00999	1.84255e-09	-0.295744	-0.45994	-0.763258	0.699837	-8.73458
CG4318	FBgn0030455	12.1473	1.11909	13.3031	0.187357	2.73539e-07	1.08448	0.0488667	1.12395	-0.72733	-6.56298
CG4332	FBgn0030456	20.7364	30.2003	8.26241	22.0184	14.3623	1.31673	1.48001	0.917107	1.34278	1.15722
Bap60	FBgn0025463	62.713	49.0048	20.7021	34.0625	38.5444	1.79736	1.69024	1.31601	1.53228	1.58596
CG12096	FBgn0030457	33.4843	9.91315	26.1503	8.58626	10.6811	1.52484	0.996211	1.41748	0.933804	1.02862
Lgr4	FBgn0085440	0.226329	4.544	9.08174e-08	1.12231e-07	51.101	-0.645259	0.657438	-7.04183	-6.94989	1.70843
CG32640	FBgn0052640	1.80151	4.88581	0	5.07844	1.54597e-09	0.255637	0.688937		0.705731	-8.8108
CG32641	FBgn0052641	3.55296	23.3565	1.59528e-07	20.8065	5.99288	0.55059	1.36841	-6.79716	1.3182	0.777636
CG12723	FBgn0030459	0.212208	0	0	0	0	-0.673239
Coq5	FBgn0030460	17.9684	16.2288	10.3889	13.7727	5.61258	1.25451	1.21029	1.01657	1.13902	0.749162
sno	FBgn0265630	181.719	111.734	233.136	83.4992	51.2876	2.2594	2.04818	2.36761	1.92168	1.71001
CG44437	FBgn0265629	1.93746	1.96281	66.6952	0.611434	6.89644e-09	0.287233	0.292879	1.82409	-0.21365	-8.16137
REG	FBgn0029133	317.147	157.614	151.421	91.867	97.2892	2.50126	2.1976	2.18019	1.96316	1.98806
mew	FBgn0004456	0.00103221	131.264	0.00168463	471.364	70.9916	-2.98623	2.11814	-2.7735	2.67336	1.85121
CG32639	FBgn0052639	0.457072	0.547161	9.23624	2.08554	4.76215	-0.340016	-0.261885	0.965495	0.319218	0.677803
CG15742	FBgn0030462	1.63805	1.0112	60.879	4.13629	3.18174	0.214327	0.00483896	1.78447	0.616611	0.502665
comt	FBgn0000346	8.62219	11.0787	26.7652	4.64207	7.18884	0.935618	1.04449	1.42757	0.666712	0.856659
HDAC4	FBgn0041210	148.041	102.445	49.5852	95.7722	162.894	2.17038	2.01049	1.69535	1.98124	2.21191
CG15743	FBgn0030465	15.2585	15.962	6.70301	15.2894	18.0174	1.18351	1.20309	0.82627	1.18439	1.25569
CG15744	FBgn0030466	11.9687	11.8861	10.3103	7.85124	5.54445	1.07805	1.07504	1.01327	0.894938	0.743858
CG1764	FBgn0030467	16.821	16.391	10.1396	12.9664	7.28895	1.22585	1.21461	1.00602	1.11282	0.862665
CG1622	FBgn0030468	52.2373	27.5066	24.4093	24.291	20.4328	1.71798	1.43944	1.38755	1.38544	1.31033
IP3K2	FBgn0283680	7.58017e-05	65.0102	3.04504	38.9157	53.4392	-4.12032	1.81298	0.483593	1.59012	1.72786
lncRNA:CR45018	FBgn0266376	0.000112742	39.1082	4.43636e-05	16.0064	9.25751	-3.94791	1.59227	-4.35297	1.20429	0.966494
Prx2	FBgn0040309	562.937	634.656	166.46	652.065	385.274	2.75046	2.80254	2.22131	2.81429	2.58577
lncRNA:CR32636	FBgn0052636	2.10064	7.99284	1.35633e-08	2.64404	5.1966e-08	0.322353	0.902701	-7.86763	0.422267	-7.28428
RpS15Aa	FBgn0010198	1905.55	2330.72	717.661	1636.64	1977.81	3.28002	3.36749	2.85592	3.21395	3.29618
CG15747	FBgn0030474	25.5328	22.9134	11.4201	14.0929	25.3792	1.4071	1.36009	1.05767	1.149	1.40448
lncRNA:CR45708	FBgn0267272	0	0	0	0	0
lncRNA:CR45709	FBgn0267273	0	0	0	0	0
Syt12	FBgn0261085	0.468226	0.767914	0.293112	3.44828e-13	2.12831e-13	-0.329544	-0.114687	-0.532966	-12.4624	-12.672
dmrt11E	FBgn0030477	0.0555366	0	0	0	0	-1.25542
CG1640	FBgn0030478	22.6236	39.8421	105.648	67.6888	41.705	1.35456	1.60034	2.02386	1.83052	1.62019
Rbp1-like	FBgn0030479	17.1553	38.51	6.25777	47.8166	53.5206	1.2344	1.58557	0.79642	1.67958	1.72852
Tim9a	FBgn0030480	156.089	99.2545	230.869	60.9449	40.9286	2.19337	1.99675	2.36337	1.78494	1.61203
Ype	FBgn0288857	16.6718	45.7202	2.63279	54.5224	60.5536	1.22198	1.66011	0.420416	1.73657	1.78214
CG1662	FBgn0030481	12.9688	10.7991	43.8051	12.2247	9.18832	1.1129	1.03339	1.64152	1.08724	0.963236
lncRNA:CR44620	FBgn0265831	0.0876929	1.34759	0	0	0	-1.05704	0.129556
lncRNA:CR44621	FBgn0265832	0.0555366	0	0	0	0	-1.25542
Bcat	FBgn0030482	0.122439	45.8934	2.46341	30.346	0.00307499	-0.912081	1.66175	0.391537	1.4821	-2.51216
CG12725	FBgn0030483	1.28571	4.09576	12.0507	5.3028e-09	5.50983e-09	0.109144	0.612335	1.08101	-8.27549	-8.25886
GstT4	FBgn0030484	0.000180037	90.2096	0.00192268	71.7105	3.54464e-07	-3.74464	1.95525	-2.71609	1.85558	-6.45043
CG1998	FBgn0030485	7.1203	11.9643	11.4442	23.8964	4.50006	0.852498	1.07789	1.05858	1.37833	0.653218
Set2	FBgn0030486	26.8265	25.4724	40.8286	15.7297	17.4284	1.42856	1.40607	1.61096	1.19672	1.24126
Neto	FBgn0265416	0.368421	0.30598	2.43476e-10	5.20606e-10	527.207	-0.433656	-0.514308	-9.61354	-9.28349	2.72198
CG34324	FBgn0085353	0	0	0	0	0
CG15754	FBgn0030492	0	0.231722	0	0	0		-0.635033
asRNA:CR44427	FBgn0265609	0	0	1.77152	0	0			0.248347
CG44428	FBgn0265610	5.62421e-05	0.214391	4.56753	0	0	-4.24994	-0.668793	0.659681
CG15756	FBgn0030493	0	0.288857	0	0	0		-0.539317
Cpr12A	FBgn0030494	0	0	0	0	0
CG11816	FBgn0030495	0.542179	0.545229	4.85351	9.24492	2.43167e-08	-0.265857	-0.263421	0.686056	0.965903	-7.6141
CG32631	FBgn0052631	0	0	0	0	0
CG32633	FBgn0052633	0	0	0	0	0
Tpst	FBgn0086674	23.4311	7.50668	10.6485	7.29521	6.42093	1.36979	0.875448	1.02729	0.863038	0.807598
CG46311	FBgn0284227	0	0	0	0	0
up	FBgn0004169	2.89975e-14	3.50697e-11	2.234e-09	3.22839	2653.23	-13.5376	-10.4551	-8.65092	0.508987	3.42377
lncRNA:CR44654	FBgn0265865	0.102307	0	1.59234	0	7.86609	-0.990097		0.202035		0.895759
CG11178	FBgn0030499	9.47457	7.08291	4.67997	3.80727	8.9953	0.976559	0.850212	0.670243	0.580613	0.954016
Ndc80	FBgn0030500	39.4241	21.2309	17.3734	6.67856	12.3215	1.59576	1.32697	1.23988	0.824683	1.09066
BthD	FBgn0030501	80.3763	50.7417	21.5526	22.4882	9.43958	1.90513	1.70536	1.3335	1.35195	0.974953
tth	FBgn0030502	60.7334	162.385	21.7316	125.871	100.122	1.78343	2.21055	1.33709	2.09993	2.00053
Tango2	FBgn0030503	24.392	14.3351	38.7041	53.7565	14.1401	1.38725	1.1564	1.58776	1.73043	1.15045
CG2691	FBgn0030504	55.9272	48.2191	16.2696	32.2664	8.17267	1.74762	1.68322	1.21138	1.50875	0.912364
NFAT	FBgn0030505	125.781	169.19	30.0494	179.899	205.372	2.09961	2.22838	1.47784	2.25503	2.31254
DNAlig4	FBgn0030506	7.41249	3.27456	6.54324	3.45309	5.03781	0.869964	0.515152	0.815793	0.538208	0.702242
CG11164	FBgn0030507	12.5209	7.88351	4.96619	6.59537	11.728	1.09764	0.89672	0.696024	0.819239	1.06922
CG15760	FBgn0030508	1.24803	0.128158	3.47697	1.95107	8.9442	0.096224	-0.892253	0.541201	0.290272	0.951542
CG11162	FBgn0030509	0	0	0	0	0
CG12177	FBgn0030510	0.00515613	14.9472	0.00684658	25.4351	18.4716	-2.28768	1.17456	-2.16453	1.40543	1.26651
CG11158	FBgn0030511	3.50135	7.12995	5.05377	4.20805	6.6077	0.544235	0.853086	0.703615	0.62408	0.82005
Nadsyn	FBgn0030512	25.5654	69.8729	12.3794	36.4578	12.3649	1.40765	1.84431	1.0927	1.56179	1.09219
Nna1	FBgn0265726	2.00764	3.15789	190.236	6.11578	230.663	0.302686	0.499397	2.27929	0.786452	2.36298
Mrgn1	FBgn0030514	26.9331	21.1972	18.324	12.1876	11.627	1.43029	1.32628	1.26302	1.08592	1.06547
mus101	FBgn0002878	26.6424	8.71459	6.65745	11.6742	6.8044	1.42557	0.940247	0.823308	1.06723	0.83279
g	FBgn0001087	21.2623	66.1811	14.3079	39.1076	44.9808	1.32761	1.82073	1.15558	1.59226	1.65303
Grip91	FBgn0001612	37.8896	24.2482	19.6635	10.7298	16.3796	1.57852	1.38468	1.29366	1.03059	1.2143
CG11134	FBgn0030518	32.209	40.2187	18.5051	42.3948	12.1805	1.50798	1.60443	1.26729	1.62731	1.08566
CG11151	FBgn0030519	27.3848	149.651	16.7293	154.666	148.432	1.43751	2.17508	1.22348	2.1894	2.17153
lncRNA:CR42861	FBgn0262108	21.9951	22.4938	7.23431	14.4724	24.5333	1.34233	1.35206	0.859397	1.16054	1.38976
Pdcd4	FBgn0030520	2469.77	925.05	456.668	508.037	396.831	3.39266	2.96617	2.6596	2.7059	2.59861
asRNA:CR43833	FBgn0264381	3.34483	0.458962	4.42408	0.802221	5.63089e-08	0.524374	-0.338224	0.645823	-0.0957062	-7.24942
CG32625	FBgn0052625	249.938	17.088	60.7777	14.558	30.8813	2.39783	1.23269	1.78374	1.1631	1.4897
Rtc1	FBgn0020909	27.0288	17.5888	9.06924	5.77832	5.26699	1.43183	1.24524	0.957571	0.761802	0.721562
Yp3	FBgn0004047	0.881027	14.3989	0.247627	21.5277	9.26307	-0.055011	1.15833	-0.606202	1.333	0.966755
rdgB	FBgn0003218	31.9586	11.6469	113.825	22.1906	52.8702	1.50459	1.06621	2.05624	1.34617	1.72321
CtsB	FBgn0030521	43.3978	257.362	34.0493	681.88	200.52	1.63747	2.41054	1.53211	2.83371	2.30216
amrt	FBgn0030522	11.0484	10.0633	2.59835	15.1179	8.75209	1.0433	1.00274	0.414697	1.17949	0.942112
inaE	FBgn0261244	35.8596	90.2592	11.0502	60.4144	131.667	1.55461	1.95549	1.04337	1.78114	2.11948
CG10993	FBgn0030524	1.04901	0.000582384	9.84245	4.891	4.453	0.0207783	-3.23479	0.993103	0.689398	0.648653
CG10996	FBgn0030525	0.299504	1.82664e-07	28.6546	3.89776	0.229795	-0.523597	-6.73835	1.4572	0.590815	-0.638659
CG11095	FBgn0030528	6.50164	6.24539	4.87038	5.44716	1.39034e-06	0.813023	0.79556	0.687563	0.73617	-5.85688
Clic	FBgn0030529	122.061	206.345	44.946	268.835	212.714	2.08658	2.31459	1.65269	2.42949	2.3278
Nup93-1	FBgn0027537	45.6944	39.3214	18.5455	15.2879	15.416	1.65986	1.59463	1.26824	1.18435	1.18797
jub	FBgn0030530	25.7568	18.2623	16.2584	18.1864	21.4201	1.41089	1.26156	1.21108	1.25975	1.33082
AMPdeam	FBgn0052626	24.3206	58.9531	53.8208	91.0048	266.743	1.38597	1.77051	1.73095	1.95906	2.42609
mamo	FBgn0267033	64.2116	10.3299	20.0112	744.094	144.512	1.80761	1.0141	1.30127	2.87163	2.1599
CG11068	FBgn0030536	1.66307	0.0046246	130.553	0.000128065	0.0073952	0.220911	-2.33493	2.11579	-3.89257	-2.13105
lncRNA:CR44655	FBgn0265866	0.681523	2.02605e-13	0	0	5.22455e-11	-0.16652	-12.6933			-10.282
ben	FBgn0000173	176.854	192.189	51.0905	142.883	130.966	2.24762	2.28373	1.70834	2.15498	2.11716
Ste12DOR	FBgn0044817	0	0	0	0	0
tRNA:Arg-TCG-2-1	FBgn0011952	0	0	0	0	0
tRNA:Ser-CGA-1-1	FBgn0011975	0	0	0	0	0
tRNA:Ser-CGA-1-2	FBgn0011976	0	0	0	0	0
tRNA:Arg-TCG-3-1	FBgn0011948	0	0	0	0	0
tRNA:Arg-TCG-3-2	FBgn0011949	0	0	0	0	0
tRNA:Arg-TCG-3-3	FBgn0011950	0	0	0	0	0
tRNA:Arg-TCG-3-4	FBgn0011951	0	0	0	0	0
tRNA:Ser-AGA-3-1	FBgn0011980	0	0	0	0	0
tRNA:Ser-AGA-2-1	FBgn0011982	0	0	0	0	0
Ste:CG33247	FBgn0053247	0	0	0	0	0
Ste:CG33246	FBgn0053246	0	0	0	0	0
Ste:CG33245	FBgn0053245	0	0	0	0	0
Ste:CG33244	FBgn0053244	0	0	0	0	0
Ste:CG33243	FBgn0053243	0	0	0	0	0
Ste:CG33242	FBgn0053242	0	0.288857	0	0	0		-0.539317
Ste:CG33241	FBgn0053241	0	0	0	0	0
Ste:CG33240	FBgn0053240	0	0	0	0	0
Ste:CG33239	FBgn0053239	0	0	0	0	0
Ste:CG33238	FBgn0053238	0	0	0	0	0
Ste:CG33237	FBgn0053237	0	0	0	0	0
Ste:CG33236	FBgn0053236	0	0	0	0	0
tRNA:Ser-AGA-1-1	FBgn0011974	0.1454	0.270527	0	0	0	-0.837435	-0.567789
lncRNA:CR46242	FBgn0267962	0	0	3.50165	0	0			0.544273
tRNA:Ser-CGA-1-3	FBgn0011977	0	0	0	0	0
tRNA:Arg-TCG-1-1	FBgn0011953	0	0	0	0	0
tRNA:Ser-AGA-3-2	FBgn0011981	0	0	0	0	0
lncRNA:CR44657	FBgn0265868	0.36287	0	0	0	0	-0.440249
tRNA:Ser-AGA-2-2	FBgn0011983	0	0	0	0	0
lncRNA:CR44658	FBgn0265869	0.0555366	0	3.18467	0	0	-1.25542		0.503065
CG12479	FBgn0040871	8.65741e-07	2.75183e-06	115.089	1.74223	3.60963	-6.06261	-5.56038	2.06104	0.241106	0.557463
CG12480	FBgn0030537	0.0753774	0	0	0	0	-1.12276
betaNACtes1	FBgn0030538	2.39055	0.590715	3.42086	0.375794	1.11697e-08	0.378498	-0.228622	0.534136	-0.42505	-7.95196
CG1368	FBgn0030539	0.125717	0.0835779	6.20245	2.20204e-09	1.0361e-08	-0.900607	-1.07791	0.792564	-8.65718	-7.9846
CG11581	FBgn0030540	0	0.288857	0	0	0		-0.539317
CG11584	FBgn0030541	0	0	0	0	0
asRNA:CR45995	FBgn0267657	0.0985628	0	2.36056	0	0	-1.00629		0.373016
CG32603	FBgn0052603	0	0	2.28453	0	0			0.358796
CG12481	FBgn0030542	0	0	0	0	0
CG11585	FBgn0030543	0	0	0	0	0
CG13403	FBgn0030544	2.31149	4.68993	2.07367e-12	304.139	7.67929	0.363892	0.671166	-11.6833	2.48307	0.885321
yl	FBgn0004649	24.4497	1.37271	1.24222	4.101	2.2515e-07	1.38827	0.137579	0.0941977	0.612889	-6.64753
mir-4917	FBgn0263530	0	0	0	0	0
CG11590	FBgn0030545	77.0036	33.0134	49.1969	30.5921	14.6608	1.88651	1.51869	1.69194	1.48561	1.16616
Prp16	FBgn0026713	27.4046	20.2459	6.01016	23.5804	9.88054	1.43782	1.30634	0.778886	1.37255	0.994781
l(1)G0469	FBgn0040153	27.7587	17.8937	6.13623	50.1869	15.3906	1.4434	1.2527	0.787902	1.70059	1.18726
CG11674	FBgn0030551	0.48525	0.000973388	0	0	0	-0.314035	-3.01171
mRpL38	FBgn0030552	62.0255	50.2629	25.19	28.5463	31.1765	1.79257	1.70125	1.40123	1.45555	1.49383
CG42271	FBgn0259166	8.2986	14.373	7.87418	29.343	13.9032	0.919005	1.15755	0.896205	1.46751	1.14311
Fbxl4	FBgn0030555	6.20526	5.32422	3.18942	6.9108	5.28711	0.79276	0.726256	0.503712	0.839528	0.723218
CG1434	FBgn0030554	7.43986	6.19845	2.14463	3.87087	3.74581	0.871565	0.792283	0.331353	0.587809	0.573546
mRNA-cap	FBgn0030556	31.9884	25.453	33.4401	20.757	21.5725	1.50499	1.40574	1.52427	1.31717	1.3339
asRNA:CR46473	FBgn0287604	3.94778	8.56981	5.72185	6.06943	17.0223	0.596353	0.932971	0.757537	0.783148	1.23102
CG32599	FBgn0260482	3.85776e-11	11.325	2.84229	5.71092	37.5693	-10.4137	1.05404	0.453668	0.756706	1.57483
mud	FBgn0002873	73.673	56.6578	129.188	23.5551	29.9756	1.86731	1.75326	2.11122	1.37209	1.47677
Tat	FBgn0030558	0.21753	0.0731567	0	0.857868	0	-0.66248	-1.13575		-0.0665797
CG46317	FBgn0284233	0	0	0	0	0
CG13404	FBgn0030559	0.111073	0.288857	0	0	0	-0.95439	-0.539317
na	FBgn0002917	0.818475	0.233115	2.25788	1.0069	4.59874	-0.0869946	-0.63243	0.353701	0.00298597	0.662639
Muc12Ea	FBgn0052602	0.19227	0.192856	0	0	0	-0.716089	-0.714767
CG9400	FBgn0030562	0.108055	0	0	0	0	-0.966355
lncRNA:CR44963	FBgn0266278	0.519928	0.16426	10.8501	2.11328	4.46113	-0.284057	-0.784468	1.03543	0.324956	0.649445
betaNACtes2	FBgn0030563	6.38976	0.00050149	17.2047	3.93673	10.1751	0.805485	-3.29974	1.23565	0.595136	1.00754
betaNACtes6	FBgn0052598	20.1673	1.45993e-10	12.0752	9.88347e-15	9.36851	1.30465	-9.83567	1.0819	-14.0051	0.971671
dpr8	FBgn0052600	15.009	6.64568e-15	5.41752	2.10754	8.14595e-07	1.17635	-14.1775	0.733801	0.323776	-6.08906
betaNACtes3	FBgn0052601	16.4815	2.18311e-08	0.00241023	0.000167832	10.5114	1.217	-7.66092	-2.61794	-3.77512	1.02166
betaNACtes4	FBgn0030566	6.0827	1.1098e-06	14.7499	2.2279e-12	6.72338	0.784097	-5.95476	1.16879	-11.6521	0.827588
CG9411	FBgn0030569	0	0	0	2.61615	0				0.417663
CG12540	FBgn0030570	0	0	0	0	0
lncRNA:CR44110	FBgn0264941	0.82925	1.02317	22.2093	6.87817e-11	2.21059e-10	-0.0813148	0.00994685	1.34653	-10.1625	-9.65549
lncRNA:CR45521	FBgn0267077	0.102307	0	2.63404	0	0	-0.990097		0.420622
CG14414	FBgn0030571	24.1284	21.3435	44.7885	14.0378	15.8572	1.38253	1.32927	1.65117	1.1473	1.20023
mRpS25	FBgn0030572	78.161	79.4686	26.4392	41.6662	48.4717	1.89299	1.9002	1.42225	1.61978	1.68549
nmdyn-D6	FBgn0030573	10.8624	4.11658	4.10585	2.25521	7.62286	1.03592	0.614537	0.613404	0.353186	0.882118
sbm	FBgn0030574	9.28492	1.34126e-05	4.39505	7.91401	47.032	0.967778	-4.87249	0.642964	0.898397	1.67239
NetA	FBgn0015773	4.00244e-12	5.92193e-10	0.0129404	0.00012515	471.009	-11.3977	-9.22754	-1.88805	-3.90257	2.67303
CG5321	FBgn0030575	0.497239	3.70914	3.38113e-13	95.1578	15.0245	-0.303435	0.569273	-12.4709	1.97844	1.1768
NetB	FBgn0015774	14.5829	7.38534e-10	7.68688	15.8507	19.5671	1.16384	-9.13163	0.88575	1.20005	1.29153
CG43088	FBgn0262534	97.1723	8.16944e-07	24.8931	0.000117274	8.83451	1.98754	-6.08781	1.39608	-3.9308	0.946182
hog	FBgn0266710	56.6328	2.67322	46.8141	6.85424e-07	0.000734126	1.75307	0.427034	1.67038	-6.16404	-3.13423
CG15890	FBgn0030576	0.811061	5.85903	4.99952	127.42	1.1209e-10	-0.0909463	0.767826	0.698928	2.10524	-9.95043
CG5334	FBgn0030577	1.0354	0.502825	13.8509	9.80301e-09	1.39785e-08	0.0151087	-0.298583	1.14148	-8.00864	-7.85454
CG5347	FBgn0030578	0.731397	0.123469	16.9669	3.40586e-10	5.10828e-10	-0.135847	-0.908444	1.2296	-9.46777	-9.29173
Ag5r2	FBgn0020508	0.210238	0	0	0	0	-0.677289
Ag5r	FBgn0015010	0.282756	0.18578	0	4.91516	4.68636	-0.548588	-0.731001		0.691538	0.670835
lncRNA:CR45522	FBgn0267078	0.133682	0	3.50165	0	0	-0.873926		0.544273
rut	FBgn0003301	22.086	6.51347	7.14883	18.1769	21.0747	1.34412	0.813812	0.854235	1.25952	1.32376
CG14408	FBgn0030581	7.10332	8.67155	4.282	13.7127	16.0783	0.851461	0.938097	0.631646	1.13712	1.20624
CG14411	FBgn0030582	78.7013	40.2784	83.9205	44.7675	68.894	1.89598	1.60507	1.92387	1.65096	1.83818
CG14410	FBgn0030583	0.261531	0.203796	0	4.61546	0	-0.582477	-0.690805		0.664215
Grx5	FBgn0030584	98.022	84.6379	106.94	65.2894	73.7021	1.99132	1.92756	2.02914	1.81484	1.86748
CG32590	FBgn0052590	15.8525	16.3504	3.67239	17.3762	8.69784	1.2001	1.21353	0.564949	1.23995	0.939412
Flo2	FBgn0264078	11.2338	57.9436	2.37697	63.7467	74.3571	1.05053	1.76301	0.376024	1.80446	1.87132
CG12539	FBgn0030586	5.49921e-08	0.290112	0	0	0	-7.2597	-0.537434
CG9522	FBgn0030587	0.0922366	0.511294	0	5.79446	0	-1.0351	-0.29133		0.763013
CG9521	FBgn0030588	0.186751	0.20307	0	0	0	-0.728737	-0.692354
CG9519	FBgn0030589	0.102305	0.171613	0	2.1162	0	-0.990102	-0.76545		0.325557
lncRNA:CR46391	FBgn0286869	0.190211	0.466664	2.65236	0	0	-0.720765	-0.330996	0.423633
CG46399	FBgn0286877	2.1013	1.86384	52.9563	4.29981	7.89915e-08	0.322488	0.270409	1.72392	0.633449	-7.10242
CG9518	FBgn0030590	1.81057	9.43234	6.80534	18.5427	4.73447e-07	0.257815	0.974619	0.83285	1.26817	-6.32473
CG45064	FBgn0266434	0	0	0	0	0
CG45065	FBgn0266435	0	0	0	0	0
CG9514	FBgn0030592	0.785936	16.5742	7.52259e-10	1.55592e-07	9.94231e-08	-0.104613	1.21943	-9.12363	-6.80801	-7.00251
CG9512	FBgn0030593	0.173094	0.377384	0	0	4.67507	-0.761719	-0.423216			0.669788
fiz	FBgn0030594	0.0537582	0.404534	0	7.83141	0	-1.26956	-0.393045		0.89384
CG14406	FBgn0030595	0.102307	0	0	0	0	-0.990097
CG12398	FBgn0030596	3.01432e-07	0.59826	0	0	0	-6.52081	-0.22311
Eo	FBgn0030597	0.110561	0.374227	0	0	0	-0.956397	-0.426865
CG9503	FBgn0030598	1.57501e-14	11.8403	2.15994	5.49984	4.7043	-13.8027	1.07336	0.334441	0.74035	0.672495
CG32591	FBgn0052591	2.6355	5.59298e-05	248.189	7.73286	2.91249	0.420863	-4.25236	2.39478	0.88834	0.464265
pdgy	FBgn0027601	2.1525	4.99418	5.06971	64.7931	46.527	0.332942	0.698464	0.704983	1.81153	1.6677
lncRNA:CR44831	FBgn0266094	0.534667	5.90336	1.16728e-09	8.24619	72.001	-0.271917	0.7711	-8.93283	0.916253	1.85734
CG9030	FBgn0030599	4.10298	2.48596	185.775	1.25884	4.81875e-08	0.6131	0.395494	2.26899	0.0999699	-7.31707
eag	FBgn0000535	11.6305	2.47448	0.362633	4.09087e-08	8.15967	1.0656	0.393484	-0.440532	-7.38818	0.911673
hiw	FBgn0030600	5.45377	1.61815e-11	7.66628	1.50446e-13	4.65066	0.736697	-10.791	0.884585	-12.8226	0.667515
be	FBgn0052594	3.76874	63.0738	0.943744	76.6785	97.4096	0.576196	1.79985	-0.0251459	1.88467	1.9886
CG5541	FBgn0030603	0.115738	50.9668	3.0317	75.6539	28.9	-0.936522	1.70729	0.481686	1.87883	1.4609
ND-B18	FBgn0030605	203.682	209.391	108.188	183.901	147.309	2.30895	2.32096	2.03418	2.26458	2.16823
opm	FBgn0264389	39.0518	31.9154	6.48711	21.3001	27.9662	1.59164	1.504	0.812051	1.32838	1.44663
dob	FBgn0030607	4.47259	8.34074	2.54991	7.33929	4.17737	0.650559	0.921204	0.406525	0.865654	0.620903
Lsd-2	FBgn0030608	137.846	155.261	22.0098	237.545	126.421	2.1394	2.19106	1.34262	2.37575	2.10182
lncRNA:CR44662	FBgn0265873	3.02917	2.63495	0.852023	6.20984	2.09784e-07	0.481324	0.420773	-0.0695489	0.793081	-6.67823
lncRNA:CR44661	FBgn0265872	0.286911	0.157778	0	3.53755	0	-0.542252	-0.801954		0.548702
CG33177	FBgn0053177	0.130558	0	0	0	0	-0.884198
asRNA:CR44960	FBgn0266275	1.23541	1.18849	2.75787e-09	1.30788e-08	1.36196e-08	0.0918116	0.074995	-8.55943	-7.88343	-7.86584
CG33178	FBgn0053178	0.423073	0.198351	0	0	0	-0.373584	-0.702566
Cox17	FBgn0030610	90.9057	38.1853	109.043	47.435	61.6266	1.95859	1.5819	2.0376	1.6761	1.78977
CG15027	FBgn0030611	76.0993	53.9891	26.0088	32.1141	42.6179	1.88138	1.73231	1.41512	1.5067	1.62959
Dbct	FBgn0030612	5.45828	11.3225	2.15982	8.60918	4.21343	0.737055	1.05394	0.334418	0.934962	0.624636
Rab3-GEF	FBgn0030613	25.9679	2.36981	1.22813	2.45028	5.15971e-08	1.41444	0.374714	0.089246	0.389215	-7.28737
CG9072	FBgn0030614	2.34154	0.00132822	191.007	5.56215	3.97434	0.369502	-2.87673	2.28105	0.745243	0.599265
Cyp4s3	FBgn0030615	0	0	0	3.58955	0				0.555039
drd	FBgn0260006	0.333073	1.03558	0.232936	29.9636	6.40856e-10	-0.477461	0.0151818	-0.632764	1.47659	-9.19324
RpL37a	FBgn0030616	3241.39	5233.12	1329.63	3940.44	3898.05	3.51073	3.71876	3.12373	3.59554	3.59085
CG9095	FBgn0030617	2.09609	1.34136	0.191439	0.923537	5.43655e-10	0.321409	0.127545	-0.71797	-0.0345458	-9.26468
CG43737	FBgn0263994	0.331823	0.265637	0	0	0	-0.479093	-0.575711
CG32588	FBgn0052588	1.31261	1.77787e-07	111.963	2.4178	5.49812	0.118134	-6.7501	2.04907	0.383421	0.740214
CG5662	FBgn0030620	1.24098	0.000680034	67.0132	4.14618	5.64927	0.093766	-3.16747	1.82616	0.617648	0.751992
CG43075	FBgn0262485	6.93033	5.08102	300.494	3.17536	1.79393e-08	0.840754	0.705951	2.47784	0.501793	-7.74619
CG43076	FBgn0262486	1.13994	1.51017	112.942	3.92522	0.222125	0.0568801	0.179026	2.05285	0.593864	-0.653403
lncRNA:CR44430	FBgn0265612	0.0918713	1.13712	6.96647e-05	0	0	-1.03682	0.0558075	-4.15699
CG9101	FBgn0030622	0.914432	0.000226685	102.56	3.55239	2.61268	-0.0388487	-3.64458	2.01098	0.55052	0.417086
PPYR1	FBgn0030623	0.401154	0.00021733	23.6778	2.62789	12.6081	-0.396689	-3.66288	1.37434	0.419607	1.10065
CG9106	FBgn0030624	0.837215	0.000266973	125.445	3.9809	1.98202	-0.077163	-3.57353	2.09845	0.599981	0.297107
lncRNA:CR44663	FBgn0265874	0	0	0	0	0
lncRNA:CR44664	FBgn0265875	0	0	0	0	0
CG5877	FBgn0030625	22.8964	12.431	51.0016	4.34665	15.299	1.35977	1.09451	1.70758	0.638155	1.18466
asRNA:CR44429	FBgn0265611	0.00010711	2.86602	2.51184	7.72613	4.864	-3.97017	0.457279	0.399993	0.887962	0.686993
gce	FBgn0261703	0.000173032	53.3704	1.28602	92.8711	119.024	-3.76187	1.7273	0.109247	1.96788	2.07563
asRNA:CR44961	FBgn0266276	0.245478	0.447851	0	3.21919	0	-0.609987	-0.348866		0.507747
Top1	FBgn0004924	185.281	215.912	76.8699	145.827	175.02	2.26783	2.33428	1.88576	2.16384	2.24309
mir-4957	FBgn0263548	0	0	0	0	0
dah	FBgn0015926	9.81839	6.88706	2.99714	8.08673	4.37289	0.99204	0.838034	0.476707	0.907773	0.640769
CG9114	FBgn0030628	13.3629	17.106	4.35702	10.6115	5.42805	1.1259	1.23315	0.639189	1.02578	0.734644
HDAC6	FBgn0026428	28.4405	22.3333	24.6935	20.0054	18.5231	1.45394	1.34895	1.39258	1.30115	1.26771
asRNA:CR44998	FBgn0266349	0.0962709	0.197138	0	2.60553	0	-1.0165	-0.70523		0.415897
CG9123	FBgn0030629	15.4962	6.72467	41.0723	3.32243	5.82552	1.19022	0.827671	1.61355	0.521456	0.765335
CG12608	FBgn0030630	70.9709	21.7286	19.7164	13.7287	15.6661	1.85108	1.33703	1.29483	1.13763	1.19496
Prp5	FBgn0030631	39.5962	22.2123	12.5683	17.77	14.6823	1.59765	1.34659	1.09928	1.24969	1.16679
acj6	FBgn0000028	2.3322	0.77364	6.71775	1.63167	4.16974	0.367766	-0.111461	0.827224	0.212632	0.620109
Pp1-13C	FBgn0003132	5.11517	1.21664	140.584	6.61496	5.83098	0.70886	0.0851631	2.14793	0.820527	0.765741
CG9164	FBgn0030634	8.30119e-11	21.3719	1.36144	3.81617	6.62333	-10.0809	1.32984	0.133997	0.581628	0.821076
Cngl	FBgn0263257	0.358837	0.134837	0	2.6048	0	-0.445103	-0.870192		0.415774
Scamp	FBgn0040285	37.0691	89.4888	22.51	141.382	79.6975	1.56901	1.95177	1.35238	2.15039	1.90144
Ahcy	FBgn0014455	80.3197	98.6294	46.4642	69.0263	61.3014	1.90482	1.99401	1.66712	1.83901	1.78747
CG11655	FBgn0030638	2.52096	11.2292	1.38889	33.7569	13.3987	0.401566	1.05035	0.142667	1.52836	1.12706
shtd	FBgn0004391	21.1775	14.9232	10.7707	9.12912	6.90353	1.32587	1.17386	1.03225	0.960429	0.839071
CG6294	FBgn0030640	0.204343	0.288941	0	0	0	-0.689641	-0.539191
CG6299	FBgn0030641	0.592675	0.441886	0	1.32344	0	-0.227184	-0.35469		0.121704
CG15642	FBgn0030642	3.37764	1.48301	3.11473	4.0654	4.49561	0.528613	0.171144	0.493421	0.609103	0.652789
CG15641	FBgn0030643	10.8081	6.37193	5.18555	7.68111e-09	9.19243e-09	1.03375	0.804271	0.714795	-8.11458	-8.03657
Grip128	FBgn0026433	12.1597	7.51087	3.38577	3.70855	5.96055	1.08492	0.87569	0.529658	0.569204	0.775287
Alg14	FBgn0030645	18.4076	18.6293	13.5849	19.9369	15.9406	1.265	1.2702	1.13306	1.29966	1.20251
mh	FBgn0267977	49.1412	24.9488	10.2937	10.4782	5.69655	1.69145	1.39705	1.01257	1.02029	0.755612
CG6324	FBgn0030647	137.423	0.000269164	39.9342	0.00112175	23.1473	2.13806	-3.56998	1.60135	-2.9501	1.3645
CG6340	FBgn0030648	115.78	55.7359	74.2718	46.0318	59.3987	2.06363	1.74614	1.87082	1.66306	1.77378
Gmap	FBgn0027287	0.800871	862.826	19.0511	343.265	22.65	-0.0964375	2.93592	1.27992	2.53563	1.35507
lncRNA:CR44888	FBgn0266182	6.05182e-14	0.321436	0	0	0	-13.2181	-0.492905
mir-283	FBgn0262426	0	0	0	0	0
mir-304	FBgn0262409	0	0	0	0	0
mir-12	FBgn0262395	0	0	0	0	0
Ac13E	FBgn0022710	5.94035	8.63377	2.49666	17.7763	8.70182	0.773812	0.9362	0.39736	1.24984	0.93961
lncRNA:CR44353	FBgn0265453	0.130512	0.317492	0	4.99288	6.4868	-0.88435	-0.498268		0.698351	0.812031
lncRNA:CR44354	FBgn0265454	0	0	0	0	0
CG42300	FBgn0259196	50.4245	0.00158161	25.2059	3.15166	0.00169931	1.70264	-2.8009	1.4015	0.49854	-2.76973
CG7860	FBgn0030653	3.33592	20.3695	53.8508	37.5231	7.97362	0.523215	1.30898	1.73119	1.5743	0.901656
CG15643	FBgn0030654	1.88326	1.62521	2.18464	5.78379	9.41849	0.274909	0.210908	0.339379	0.762213	0.973981
CG9213	FBgn0030655	11.9772	9.10212	3.50062	7.09336	9.21551	1.07835	0.959142	0.544145	0.850852	0.964519
CG42299	FBgn0259195	15.2219	0.000268948	9.78387	2.36072	1.97449	1.18247	-3.57033	0.990511	0.373044	0.295454
cerv	FBgn0030657	13.922	15.2554	14.3061	13.1128	5.1094	1.1437	1.18342	1.15552	1.11769	0.70837
CG7872	FBgn0030658	22.3015	46.4873	27.1827	65.5402	37.6616	1.34833	1.66733	1.43429	1.81651	1.5759
CG9215	FBgn0030659	20.3075	15.469	7.51883	13.8419	4.28794	1.30766	1.18946	0.87615	1.1412	0.632249
CG8097	FBgn0030660	175.518	3.53369e-09	123.914	0.0134799	34.154	2.24432	-8.45177	2.09312	-1.87031	1.53344
Chsy	FBgn0030662	1.89489e-07	39.2925	3.00886	13.092	39.2107	-6.72242	1.59431	0.478402	1.11701	1.59341
Alp11	FBgn0030661	0.786812	1.19966e-06	43.6022	1.16633	3.17332	-0.104129	-5.92094	1.63951	0.0668198	0.501514
sog	FBgn0003463	1.69758	3.39656	5.66096	25.9046	123.67	0.229831	0.53104	0.75289	1.41338	2.09227
lncRNA:CR44423	FBgn0265596	0.111073	0	0	3.89348	0	-0.95439			0.590338
lncRNA:CR44893	FBgn0266198	0.0555366	0	0	0	0	-1.25542
CG8117	FBgn0030663	0.107622	0.581745	8.544	1.20775e-17	2.63038	-0.9681	-0.235268	0.931661	-16.918	0.420019
asRNA:CR43299	FBgn0262991	2.43857	0.00204286	48.3469	0.380744	0.643494	0.387136	-2.68976	1.68437	-0.419367	-0.191456
CG8119	FBgn0030664	5.80275	2.36188e-11	3.20308e-06	5.39985e-07	3.19895	0.763634	-10.6267	-5.49443	-6.26762	0.505007
CG15646	FBgn0030665	2.57986	0.498859	1.20454e-07	5.87124e-08	19.5294	0.411597	-0.302022	-6.91918	-7.23127	1.29069
CG12708	FBgn0030666	3.24892	0.583268	4.36458e-08	5.17684e-08	70.9165	0.511739	-0.234132	-7.36006	-7.28594	1.85075
CG15599	FBgn0030667	177.376	0.016782	73.8868	0.04709	18.9579	2.24889	-1.77516	1.86857	-1.32707	1.27779
lncRNA:CR43132	FBgn0262606	80.7812	0.00169218	52.0548	0.000312249	10.9668	1.90731	-2.77155	1.71646	-3.5055	1.04008
lncRNA:CR45523	FBgn0267079	6.72808	0.240631	2.61422	4.5615e-08	5.76039e-08	0.827891	-0.618648	0.417343	-7.34089	-7.23955
lncRNA:CR45524	FBgn0267080	0.0707617	0.217143	3.71519	0	0	-1.1502	-0.663255	0.569981
lncRNA:CR45526	FBgn0267082	0.606992	4.85324e-08	2.53341	0	4.59267	-0.216817	-7.31397	0.403706		0.662065
CG8128	FBgn0030668	15.1702	17.7606	56.361	15.1391	3.07481e-06	1.18099	1.24946	1.75098	1.1801	-5.51218
CG9240	FBgn0030669	36.4425	54.4661	65.9253	34.4711	50.9715	1.56161	1.73613	1.81905	1.53745	1.70733
Pis	FBgn0030670	18.5147	29.1361	23.3024	69.9894	95.2767	1.26752	1.46443	1.3674	1.84503	1.97899
CG8134	FBgn0030671	13.3402	12.978	11.8538	18.1868	26.6812	1.12516	1.11321	1.07386	1.25976	1.42621
CG9281	FBgn0030672	185.22	160.686	127.585	91.3056	151.613	2.26769	2.20598	2.1058	1.9605	2.18074
CG15601	FBgn0030673	18.0123	7.89878	9.89828	4.36229	4.4235	1.25557	0.89756	0.99556	0.639715	0.645766
HUWE1	FBgn0030674	357.858	89.7948	89.3944	74.2023	110.89	2.55371	1.95325	1.95131	1.87042	2.04489
CG8191	FBgn0030675	7.63233	5.34162	4.58836	7.02687	4.62985	0.882657	0.727673	0.661657	0.846762	0.665566
CG12379	FBgn0030676	25.7054	18.8961	18.4742	11.8407	19.853	1.41002	1.27637	1.26657	1.07338	1.29783
MagR	FBgn0026666	34.194	31.4239	151.527	0.0206358	18.921	1.53395	1.49726	2.18049	-1.68538	1.27694
Arp6	FBgn0011741	32.5724	48.6837	15.5069	17.1454	43.6938	1.51285	1.68738	1.19052	1.23415	1.64042
CG11679	FBgn0030678	20.4974	20.0902	9.27494	14.3024	10.5132	1.3117	1.30299	0.967311	1.15541	1.02174
CG8206	FBgn0030679	19.0406	22.128	16.2332	28.1771	38.1023	1.27968	1.34494	1.2104	1.4499	1.58095
CG8944	FBgn0030680	27.2487	9.61841	11.9506	7.01215	12.0595	1.43535	0.983103	1.07739	0.845851	1.08133
CCT6	FBgn0027329	164.983	174.363	64.7864	106.085	94.6816	2.21744	2.24145	1.81148	2.02565	1.97627
Mvd	FBgn0030683	10.1944	7.81695	5.62496	6.71923	0.0010752	1.00836	0.893037	0.75012	0.82732	-2.96851
Graf	FBgn0030685	40.2585	68.218	53.357	78.466	63.7468	1.60486	1.8339	1.72719	1.89468	1.80446
CG8260	FBgn0030684	2.04746	0.565164	41.2962	8.69288e-11	3.77736e-10	0.311215	-0.247825	1.61591	-10.0608	-9.42281
mRpL3	FBgn0030686	52.3861	60.9928	16.0545	33.1036	33.9425	1.71922	1.78528	1.2056	1.51987	1.53074
Polr3A	FBgn0030687	11.7194	9.68735	4.40829	6.06442	10.378	1.0689	0.986205	0.64427	0.78279	1.01611
CG8952	FBgn0030688	0.0475416	0.124187	1.77152	0	0	-1.32293	-0.905925	0.248347
CG33172	FBgn0053172	7.0157	5.2872	4.25634	5.19215	0.000505568	0.846071	0.723226	0.629037	0.715347	-3.29622
CG43672	FBgn0263747	2.7809	1.21742	9.66629	1.63752e-08	1.55631e-08	0.444185	0.0854394	0.98526	-7.78581	-7.8079
CG43673	FBgn0263748	0.218307	0.199278	0	0	0	-0.660933	-0.70054
Efhc1.1	FBgn0030691	2.69719	1.75961	82.7209	4.62707	4.20616	0.430912	0.245416	1.91762	0.665306	0.623886
Paf-AHalpha	FBgn0025809	63.0037	57.6498	63.475	38.2046	68.4681	1.79937	1.7608	1.8026	1.58212	1.83549
mRpS30	FBgn0030692	44.8562	48.4216	19.6577	18.8034	19.1193	1.65182	1.68504	1.29353	1.27424	1.28147
Rhp	FBgn0026374	10.7007	9.36559e-08	3.90961	9.02635	6.04826	1.02941	-7.02846	0.592133	0.955512	0.78163
sordd1	FBgn0030693	26.2302	56.3432	65.6782	63.2575	60.6989	1.4188	1.75084	1.81742	1.80111	1.78318
sordd2	FBgn0052581	11.6617	19.6939	29.628	18.4747	16.1392	1.06676	1.29433	1.4717	1.26658	1.20788
CG15602	FBgn0030694	23.233	13.8432	28.7749	19.164	14.613	1.36611	1.14124	1.45901	1.28249	1.16474
PGRP-LE	FBgn0030695	22.6058	21.6877	26.9793	26.3705	18.4206	1.35422	1.33621	1.43103	1.42112	1.2653
sd	FBgn0003345	162.114	251.81	39.4723	216.416	376.229	2.20982	2.40107	1.59629	2.33529	2.57545
lncRNA:CR44384	FBgn0265534	0.144515	5.24501	4.11479	3.13767	7.53161	-0.840088	0.719746	0.614348	0.496608	0.876888
CG8509	FBgn0030696	5.98308e-07	1.44094	42.1123	7.7701	4.51153	-6.22308	0.158646	1.62441	0.890426	0.654324
Chc	FBgn0000319	86.1704	225.128	73.2845	221.062	186.759	1.93536	2.35243	1.86501	2.34451	2.27128
lncRNA:CR32582	FBgn0052582	3.77192	0.848917	31.8998	0.197213	6.25463	0.576562	-0.0711347	1.50379	-0.705065	0.796201
CG8565	FBgn0030697	4.56167	0.00163041	349.725	0.000350017	0.000231413	0.659124	-2.7877	2.54373	-3.45591	-3.63561
ArgRS	FBgn0027093	54.0878	35.8122	14.381	24.2811	24.7982	1.7331	1.55403	1.15779	1.38527	1.39442
CG8578	FBgn0030699	11.9083	13.3201	5.11098	11.1622	13.2257	1.07585	1.12451	0.708504	1.04775	1.12142
sun	FBgn0014391	418.337	996.904	250.285	522.636	368.37	2.62153	2.99865	2.39843	2.7182	2.56628
UBL3	FBgn0026076	42.6541	59.5407	30.3609	71.3852	113.248	1.62996	1.77481	1.48232	1.85361	2.05403
CG15914	FBgn0030700	8.08137	5.76471	6.79264	5.87047	9.32362	0.907485	0.760778	0.832038	0.768673	0.969585
Myb	FBgn0002914	1.05788	1.63614	3.68453	3.54113	8.92788	0.0244353	0.213821	0.566382	0.549142	0.950749
CG46440	FBgn0287210	0	0	0	0	0
AlkB	FBgn0065035	7.85798	18.2952	2.97267	11.2784	12.0553	0.895311	1.26234	0.473146	1.05225	1.08118
Gbeta13F	FBgn0001105	311.757	357.901	202.256	377.466	446.209	2.49382	2.55376	2.3059	2.57688	2.64954
Gapdh2	FBgn0001092	95.415	157.415	55.0581	311.05	262.71	1.97962	2.19705	1.74082	2.49283	2.41948
CG16952	FBgn0030701	25.9402	30.996	12.4237	21.636	29.826	1.41397	1.49131	1.09425	1.33518	1.4746
tay	FBgn0260938	73.0101	66.7755	27.8668	64.2312	74.3196	1.86338	1.82462	1.44509	1.80775	1.8711
MSBP	FBgn0030703	45.2511	53.5771	86.4527	120.416	135.602	1.65563	1.72898	1.93678	2.08068	2.13227
CG15916	FBgn0030704	21.1244	13.6777	10.72	10.2402	23.9294	1.32478	1.13601	1.03019	1.01031	1.37893
shi	FBgn0003392	75.4862	98.4376	144.924	69.9856	85.4184	1.87787	1.99316	2.16114	1.84501	1.93155
CycD	FBgn0010315	28.0828	37.1154	7.10117	21.0859	24.67	1.44844	1.56955	0.85133	1.32399	1.39217
Lrp4	FBgn0030706	4.3539	0.911546	5.86234	9.32829e-09	1.40346e-08	0.638879	-0.0402212	0.768071	-8.0302	-7.8528
CG8916	FBgn0030707	0.207406	0	0	0	0	-0.683178
Lcch3	FBgn0010240	0.302379	0.566479	2.37737	0	0	-0.519448	-0.246816	0.376097
asRNA:CR45000	FBgn0266351	3.89172	5.0691	1.17881e-07	5.30302	12.161	0.590141	0.704931	-6.92855	0.724523	1.08497
Ranbp16	FBgn0053180	34.9591	33.4565	144.797	29.4676	26.7156	1.54356	1.52448	2.16076	1.46935	1.42676
Stim	FBgn0045073	29.205	102.537	46.3587	97.1112	76.8546	1.46546	2.01088	1.66613	1.98727	1.88567
CG8924	FBgn0030710	29.7759	27.1166	8.80322	10.4857	0.00414865	1.47387	1.43323	0.944642	1.0206	-2.38209
Rrp47	FBgn0030711	70.4443	85.6878	29.0642	45.0267	55.6618	1.84785	1.93292	1.46336	1.65347	1.74556
mmd	FBgn0259110	0.241475	0.391088	0.613601	1.31742e-08	2.44392	-0.617127	-0.407726	-0.212114	-7.88028	0.388087
mir-927	FBgn0262210	0	0	0	0	0
lncRNA:CR45527	FBgn0267083	0.150755	0	0	0	0	-0.821729
Or13a	FBgn0030715	0.0555366	0	0	0	0	-1.25542
CG42766	FBgn0261834	4.68926	3.70616	183.089	3.89958	2.6448e-08	0.671105	0.568924	2.26266	0.591018	-7.57761
CG9170	FBgn0030716	8.99886	1.95356	11.8603	2.31442	5.47682	0.954187	0.290827	1.0741	0.364443	0.738529
Slc25A46a	FBgn0030717	9.81169	9.60509	5.6392	8.13187	26.2491	0.991744	0.982501	0.751218	0.91019	1.41911
ND-20	FBgn0030718	109.181	177.007	61.2814	140.106	126.823	2.03815	2.24799	1.78733	2.14646	2.1032
eIF5	FBgn0030719	9.6927	11.0442	56.8954	15.8306	13.4808	0.986445	1.04313	1.75508	1.1995	1.12972
CG46312	FBgn0284228	0	0	0	0	0
exd	FBgn0000611	123.15	73.0265	31.938	78.6571	131.536	2.09044	1.86348	1.50431	1.89574	2.11904
CG8939	FBgn0030720	66.5525	38.8382	12.7379	4.45941	12.0543	1.82316	1.58926	1.1051	0.649277	1.08114
vap	FBgn0003969	34.4049	35.5171	8.43382	25.8861	44.9231	1.53662	1.55044	0.926024	1.41307	1.65247
CG12698	FBgn0030721	1.26347	0.00175116	81.7517	9.25951	0.414068	0.101564	-2.75667	1.9125	0.966588	-0.382928
Muc14A	FBgn0052580	8.94153	0.000371616	11.2069	0.0163021	7.35945	0.951412	-3.42991	1.04949	-1.78776	0.866845
CG12395	FBgn0030722	2.23238	1.13679e-05	69.1884	3.54932	7.63049	0.348768	-4.94432	1.84003	0.550145	0.882552
dpr18	FBgn0030723	7.18652	1.70394e-09	2.86872	5.15108e-15	7.37538	0.856519	-8.76855	0.457688	-14.2881	0.867784
Nipsnap	FBgn0030724	30.1796	58.2591	10.9918	72.6511	68.3659	1.47971	1.76536	1.04107	1.86124	1.83484
Tob	FBgn0028397	7.03757	29.5371	248.253	40.8207	44.3684	0.847423	1.47037	2.39489	1.61088	1.64707
mir-4958	FBgn0263516	0	0	0	0	0
CG8958	FBgn0030725	1.02491	0.0167587	28.8303	1.81732	3.63599	0.010686	-1.77576	1.45985	0.259432	0.560622
CG42353	FBgn0259699	0	0	0	0	0
CG42354	FBgn0259700	0.50204	1.81251	0.431917	4.76311	11.1954	-0.299262	0.25828	-0.3646	0.67789	1.04904
disco-r	FBgn0285879	0.193351	5.31021e-08	1.49315	1.03965	309.622	-0.713654	-7.27489	0.174104	0.0168867	2.49083
lncRNA:CR46211	FBgn0267930	3.09061	0.884103	30.8506	0.855996	9.52333e-10	0.490045	-0.0534973	1.48926	-0.0675281	-9.02121
mir-985	FBgn0262283	0	0	0	0	0
disco	FBgn0000459	6.80973e-12	3.72127e-10	1.13297e-13	1.84452e-07	428.003	-11.1669	-9.42931	-12.9458	-6.73412	2.63145
snRNA:U5:14B	FBgn0003933	0.228983	0.22019	0	0	0	-0.640197	-0.657202
snRNA:U2:14B	FBgn0003920	0.379453	0.0306056	2.60305	2.55565	0	-0.420842	-1.5142	0.415482	0.407501
CG12507	FBgn0030729	0.258194	0	0	3.15406	0	-0.588053			0.49887
kat80	FBgn0040207	33.1686	20.1139	11.6006	21.1097	15.9187	1.52073	1.3035	1.06448	1.32448	1.20191
Mfe2	FBgn0030731	12.356	21.9624	7.99157	32.7212	18.4003	1.09188	1.34168	0.902632	1.51483	1.26483
Prosalpha4	FBgn0004066	258.442	155.496	67.8295	142.814	111.219	2.41236	2.19172	1.83142	2.15477	2.04618
eas	FBgn0000536	30.0553	14.63	39.2009	56.1598	26.9227	1.47792	1.16524	1.5933	1.74943	1.43012
CG32576	FBgn0052576	9.69002	20.5701	17.1527	19.5264	10.116	0.986325	1.31324	1.23433	1.29062	1.00501
UQCR-14	FBgn0030733	337.614	683.78	130.494	369.278	332.718	2.52842	2.83492	2.11559	2.56735	2.52208
caz	FBgn0285954	70.4602	53.3734	24.0191	36.0107	22.947	1.84794	1.72732	1.38056	1.55643	1.36073
ERp44	FBgn0030734	22.8009	27.6833	12.4809	34.8176	24.2048	1.35795	1.44222	1.09625	1.5418	1.3839
CG3632	FBgn0030735	12.2871	16.7754	7.63081	23.0462	15.8063	1.08945	1.22467	0.882571	1.3626	1.19883
CG3679	FBgn0027521	48.8542	0.0011584	14.6528	2.08793e-06	6.7851	1.6889	-2.93614	1.16592	-5.68028	0.831557
Had1	FBgn0286508	0.740934	0.339804	3.12372	26.5624	8.6301	-0.13022	-0.468771	0.494672	1.42427	0.936016
asRNA:CR45485	FBgn0267041	11.9203	0.894671	0.809423	1.66496e-07	2.00346e-07	1.07629	-0.0483364	-0.0918247	-6.7786	-6.69822
CG9915	FBgn0030738	39.8228	33.7535	11.967	13.3375	25.3147	1.60013	1.52832	1.07798	1.12508	1.40337
SWIP	FBgn0030739	12.0543	7.93606	3.79592	5.42965	2.36953	1.08114	0.899605	0.579317	0.734772	0.374662
Cyp1	FBgn0004432	1410.1	798.775	452.875	1086.85	998.044	3.14925	2.90242	2.65598	3.03617	2.99915
CG9917	FBgn0030740	26.724	64.7544	9.75578	123.263	99.3789	1.4269	1.81127	0.989262	2.09083	1.99729
CG32579	FBgn0052579	6.71781	9.17616	3.94314	3.92339	3.76199	0.827228	0.962661	0.595843	0.593662	0.575418
CalpC	FBgn0260450	3.44604	9.24841	2.10311	8.26095	2.98363	0.537321	0.966067	0.322862	0.91703	0.474745
CG9919	FBgn0030742	0.922952	0.161628	5.64267	3.62486	8.14759	-0.0348207	-0.791483	0.751485	0.559291	0.911029
CG9921	FBgn0030743	52.2872	44.3694	40.1116	51.0704	52.959	1.7184	1.64708	1.60327	1.70817	1.72394
Dsp1	FBgn0278608	694.45	399.069	143.558	325.287	390.845	2.84164	2.60105	2.15703	2.51227	2.592
sl	FBgn0003416	22.8246	22.354	8.24829	11.3423	106.452	1.3584	1.34936	0.916364	1.0547	2.02716
U2af50	FBgn0005411	81.7463	94.5941	65.3748	73.1569	74.6138	1.91247	1.97586	1.81541	1.86426	1.87282
PIG-Q	FBgn0086448	10.8922	11.412	5.19147	9.23268	9.69939	1.03712	1.05736	0.71529	0.965328	0.986744
nonA	FBgn0004227	92.305	76.4816	30.6861	65.1763	78.6332	1.96523	1.88356	1.48694	1.81409	1.89561
Fur2	FBgn0004598	17.7973	45.0011	5.79887	62.6576	9.96251	1.25035	1.65322	0.763343	1.79697	0.998369
CG9992	FBgn0030744	75.0403	46.4401	89.9579	37.7464	48.0147	1.87529	1.66689	1.95404	1.57688	1.68137
CG4239	FBgn0030745	7.49413	14.1131	5.01951	12.8141	62.0007	0.874721	1.14962	0.700662	1.10769	1.7924
TH1	FBgn0010416	32.7428	34.4461	20.7931	27.0729	31.2669	1.51512	1.53714	1.31792	1.43254	1.49509
mei-41	FBgn0004367	25.9173	9.87514	11.3833	5.62767	0.0043686	1.41359	0.994543	1.05627	0.750328	-2.35966
CG9981	FBgn0030746	0.285828	0.218906	3.50165	0	0	-0.543895	-0.659742	0.544273
CG4301	FBgn0030747	1.19456	0.760772	3.79141e-10	0.856494	1.37511e-09	0.0772087	-0.118745	-9.4212	-0.0672755	-8.86166
Traf-like	FBgn0030748	2.09106e-05	0.796588	0	2.20235	0	-4.67963	-0.0987664		0.342887
AnxB11	FBgn0030749	18.4063	132.972	17.2502	170.827	69.2779	1.26497	2.12376	1.2368	2.23256	1.84059
hang	FBgn0026575	596.309	111.666	109.07	103.518	120.016	2.77547	2.04792	2.0377	2.01501	2.07924
CDC50	FBgn0030752	17.874	31.3207	8.49682	41.5822	44.7085	1.25222	1.49583	0.929256	1.61891	1.65039
rngo	FBgn0030753	61.7559	39.9359	52.9993	25.6636	39.6706	1.79068	1.60136	1.72427	1.40932	1.59847
eIF2alpha	FBgn0261609	233.712	173.131	122.608	104.228	101.865	2.36868	2.23838	2.08852	2.01798	2.00803
CG34015	FBgn0054015	30.1894	29.8061	26.7491	23.4917	0.00559332	1.47985	1.47431	1.42731	1.37092	-2.25233
eIF4H1	FBgn0262734	323.816	235.644	74.777	149.973	152.613	2.5103	2.37226	1.87377	2.17601	2.18359
para	FBgn0285944	19.9736	0.320115	2.90037	4.66407e-08	2.24504	1.30046	-0.494694	0.462453	-7.33124	0.351225
Cnx14D	FBgn0264077	0.556809	0.00589705	34.987	4.14616	8.86275	-0.254293	-2.22937	1.54391	0.617646	0.947568
CG9903	FBgn0030756	0.161254	0	0	0	0	-0.79249
CG9902	FBgn0030757	14.1629	0.911995	5.89717	2.76016	2.79676	1.15115	-0.0400076	0.770644	0.440934	0.446655
Arp2	FBgn0011742	43.6032	56.2871	47.3051	62.3712	28.3143	1.63952	1.75041	1.67491	1.79498	1.45201
Pp2B-14D	FBgn0011826	72.2623	58.9098	14.1497	47.8788	72.091	1.85891	1.77019	1.15075	1.68014	1.85788
CanA-14F	FBgn0267912	19.6791	31.7775	4.08276	49.6936	222.026	1.29401	1.50212	0.610954	1.6963	2.3464
CG13014	FBgn0030759	18.6148	22.8134	5.79894	19.116	0.00159683	1.26986	1.35819	0.763348	1.2814	-2.79674
SMC3	FBgn0015615	57.4822	13.9766	13.1392	16.6148	28.1444	1.75953	1.1454	1.11857	1.2205	1.44939
Ubc7	FBgn0267384	46.0121	27.7862	35.8409	34.4303	53.0801	1.66287	1.44383	1.55438	1.53694	1.72493
CG9784	FBgn0030761	17.9829	9.43502	5.83122	10.108	20.9944	1.25486	0.974743	0.765759	1.00467	1.3221
Nup153	FBgn0061200	330.63	138.981	79.1139	71.153	98.2424	2.51934	2.14295	1.89825	1.85219	1.9923
mir-4965	FBgn0263538	0	0	0	0	0
mbt	FBgn0025743	117.577	112.357	34.5439	136.628	74.1177	2.07032	2.0506	1.53837	2.13554	1.86992
sisRNA:2	FBgn0286040	0.165608	0	0	0	3.4038	-0.780919				0.531964
CG9782	FBgn0030763	0.278384	0.271934	2.57374	0	4.63704	-0.555356	-0.565536	0.410564		0.666241
Rok	FBgn0026181	144.774	202.994	31.2803	246.578	487.743	2.16069	2.30748	1.49527	2.39196	2.68819
CG9777	FBgn0030764	2.56465	4.70101	22.5651	6.34735	12.5603	0.409028	0.672191	1.35344	0.802593	1.099
asRNA:CR45001	FBgn0266352	0.0637093	0.355867	0	0	0	-1.1958	-0.448713
sbRNA:1	FBgn0286878	0	0	0	0	0
RpS19a	FBgn0010412	1955.15	2116.25	784.981	1989.02	2382.06	3.29118	3.32557	2.89486	3.29864	3.37695
SNRPG	FBgn0261791	1096.6	317.061	387.228	185.365	217.831	3.04005	2.50114	2.58797	2.26803	2.33812
mthl1	FBgn0030766	28.7514	112.955	14.0241	118.281	180.528	1.45866	2.0529	1.14688	2.07291	2.25655
lncRNA:CR46147	FBgn0267826	0.0599454	0.450328	0	0	0	-1.22224	-0.346471
CG42512	FBgn0260238	0.182146	0.201525	4.64677	2.04662	0	-0.739581	-0.695671	0.667152	0.311037
CG32573	FBgn0052573	0	0	0	0	0
Nemp	FBgn0030768	11.1205	12.6616	13.703	9.73138	5.65417e-05	1.04612	1.10249	1.13682	0.988175	-4.24763
r	FBgn0003189	14.9861	78.5885	16.3239	29.9149	0.00373746	1.17569	1.89536	1.21282	1.47589	-2.42742
CG15865	FBgn0015336	0.00554619	0.385856	0	4.92508	0	-2.25601	-0.413575		0.692413
CG13012	FBgn0030769	0.48831	1.07475	4.19548e-10	15.4549	9.81248	-0.311304	0.0313088	-9.37722	1.18907	0.991779
CG13010	FBgn0030770	1.58231	1.11015	154.984	1.09141	3.53676	0.199292	0.0453816	2.19029	0.0379887	0.548605
sing	FBgn0261245	0.370405	0.826433	3.27751	3.63092	9.49934	-0.431324	-0.0827925	0.515545	0.560016	0.977693
Axs	FBgn0000152	6.27929	15.9589	2.90417	13.3338	17.534	0.79791	1.203	0.463023	1.12495	1.24388
Septin4	FBgn0259923	72.1686	0.0981535	19.0461	4.3389	2.50316	1.85835	-1.00809	1.27981	0.63738	0.398489
CG4678	FBgn0030778	1.0856	0.0769616	3.81687e-08	0.961379	1.35659	0.0356705	-1.11373	-7.41829	-0.0171053	0.132449
CG9676	FBgn0030773	0	0	0	0	0
sphe	FBgn0030774	0	0	0	0	0
CG9673	FBgn0030775	0.210238	0	1.59234	0	0	-0.677289		0.202035
CG4653	FBgn0030776	0.0555366	0	0	0	0	-1.25542
CG9672	FBgn0030777	0	0	3.27761	0	4.59857			0.515557		0.662623
CG13008	FBgn0030780	0.911973	0.508749	86.2179	3.83357	4.27929	-0.0400182	-0.293496	1.9356	0.583604	0.631372
CG34325	FBgn0085354	0.000141015	7.36561	50.3407	201.741	369.122	-3.85074	0.867209	1.70192	2.30479	2.56717
CG32572	FBgn0052572	0.0116836	0.00173149	64.4563	1.83248	4.41322	-1.93242	-2.76158	1.80927	0.263039	0.644756
goe	FBgn0027528	20.9843	29.7515	5.15024	28.6601	2.21344	1.3219	1.47351	0.711827	1.45728	0.345067
TwdlX	FBgn0052571	0.102307	0	0	0	0	-0.990097
TwdlY	FBgn0052570	0.204613	0.134837	0	0	0	-0.689067	-0.870192
TwdlZ	FBgn0052569	0.102307	0	0	0	0	-0.990097
CG32568	FBgn0052568	0.00101681	0.000813523	134.37	1.8923	0.0013598	-2.99276	-3.08963	2.1283	0.27699	-2.86653
Twdlalpha	FBgn0052574	2.99453	1.72102	74.6592	1.57453e-09	2.72981	0.476328	0.235786	1.87308	-8.80285	0.436132
if	FBgn0001250	3.5355e-09	11.1809	0.00137003	14.8188	161.068	-8.45155	1.04848	-2.86327	1.17081	2.20701
mRpL22	FBgn0030786	89.8493	112.91	37.9623	71.6549	50.7725	1.95351	2.05273	1.57935	1.85525	1.70563
CG9609	FBgn0030787	32.7889	24.394	15.0281	19.694	14.9095	1.51573	1.38728	1.1769	1.29433	1.17346
Sap30	FBgn0030788	26.7723	22.1126	6.15888	28.8157	13.6465	1.42769	1.34464	0.789502	1.45963	1.13502
Rrp45	FBgn0030789	20.0144	12.8542	7.96425	5.7591	14.5915	1.30134	1.10905	0.901145	0.760355	1.1641
CG4768	FBgn0030790	91.137	55.7913	23.7268	35.4346	58.1782	1.95969	1.74657	1.37524	1.54943	1.76476
CG9132	FBgn0030791	27.0301	61.3185	14.577	36.6071	33.9895	1.43185	1.78759	1.16367	1.56357	1.53134
CG4789	FBgn0030792	60.6876	74.7951	27.6676	53.8691	72.935	1.7831	1.87387	1.44197	1.73134	1.86294
Rai1	FBgn0030793	39.6794	15.9046	10.7066	24.7995	0.00613857	1.59857	1.20152	1.02965	1.39444	-2.21193
CG13005	FBgn0030794	7.44012	2.43929	5.89131	3.50048	3.90278	0.87158	0.387264	0.770212	0.544128	0.591374
asRNA:CR44053	FBgn0264862	2.69911	2.32248e-07	7.74506	2.02041	4.90059	0.431221	-6.63405	0.889025	0.30544	0.690248
ppk28	FBgn0030795	3.31854	7.42083	1.55622	8.99632	1.07031e-06	0.520948	0.870452	0.192072	0.954065	-5.97049
CG4829	FBgn0030796	0.672839	7.80651	2.63655	134.069	73.3641	-0.172089	0.892457	0.421035	2.12733	1.86548
lncRNA:CR44129	FBgn0264960	0.0555366	0	0	0	0	-1.25542
CG46306	FBgn0284222	0	0	0	0	0
CG13004	FBgn0030797	0	0.231722	2.50178	0	0		-0.635033	0.398249
RSG7	FBgn0024941	0.887769	0.00154207	3.96786	4.20822	6.17235	-0.0517002	-2.8119	0.598557	0.624098	0.790451
CG13003	FBgn0030798	0.0990325	0.223678	0	9.96911	0	-1.00422	-0.650377		0.998656
CG4872	FBgn0030799	1.71585	0.648029	1.62077	6.17598	4.18877	0.234478	-0.188406	0.209721	0.790706	0.622087
Nprl2	FBgn0030800	10.6505	8.04466	5.23833	7.49619	6.68632	1.02737	0.905508	0.719192	0.874841	0.825187
Polr3I	FBgn0030801	15.6742	12.9994	7.0236	0.00302957	10.5659	1.19519	1.11392	0.84656	-2.51862	1.02391
DENR	FBgn0030802	100.941	72.9698	34.5492	62.6986	47.9465	2.00407	1.86314	1.53844	1.79726	1.68076
CG4880	FBgn0030803	9.63072	17.3347	27.5232	6.82576	0.0407947	0.983659	1.23892	1.4397	0.834151	-1.3894
lncRNA:CR43768	FBgn0264268	8.43864e-07	0.197138	2.17708	0	0	-6.07373	-0.70523	0.337875
CG13002	FBgn0030804	0	0	0	0	0
CG33252	FBgn0053252	0.338971	0.848574	13.1089	3.62503e-09	0.971175	-0.469837	-0.0713104	1.11757	-8.44069	-0.0127026
lncRNA:CR44754	FBgn0265967	0.268568	2.26667	2.67814e-09	3.12244	6.82956	-0.570946	0.355389	-8.57217	0.494494	0.834393
CG4928	FBgn0027556	0.352342	574.176	21.5621	285.613	1.20797	-0.453035	2.75904	1.33369	2.45578	0.0820569
wus	FBgn0030805	3.54945	17.6997	3.03352	5.7459	3.93858	0.550161	1.24797	0.481947	0.759358	0.59534
CG13001	FBgn0030806	16.6773	18.4063	0.00120301	7.91037	24.6278	1.22213	1.26497	-2.91973	0.898197	1.39143
[truncated: 15,560 more rows]

## Sheet: Classification_Results
			Off/On threshold: CPM = 5
symbol	flybase	chrom	GSC_Class	CySC_Class
H3-GFP			high	high
lncRNA:CR40469	FBgn0058469	X	off	low
CG17636	FBgn0025837	X	off	off
RhoGAP1A	FBgn0025836	X	medium	medium
mir-4915	FBgn0263567	X	off	off
tyn	FBgn0284435	X	low	low
lncRNA:CR45473	FBgn0267029	X	off	medium
CG17707	FBgn0025835	X	off	off
lncRNA:CR43863	FBgn0264445	X	off	off
CG3038	FBgn0040373	X	low	medium
G9a	FBgn0040372	X	high	high
CG42376	FBgn0259722	X	medium	high
cin	FBgn0000316	X	low	medium
CG13377	FBgn0261446	X	off	off
asRNA:CR43906	FBgn0264507	X	low	low
CG13376	FBgn0029518	X	off	off
ewg	FBgn0005427	X	medium	high
CG3777	FBgn0024989	X	off	off
mir-980	FBgn0262266	X	off	off
CG13375	FBgn0040370	X	low	off
CG12470	FBgn0040371	X	low	low
Or1a	FBgn0029521	X	off	off
CG32816	FBgn0052816	X	low	off
CG43181	FBgn0262810	X	off	off
CG43182	FBgn0262811	X	off	off
y	FBgn0004034	X	off	off
lncRNA:yar	FBgn0266568	X	off	off
ac	FBgn0000022	X	off	off
lncRNA:CR44751	FBgn0265964	X	off	off
lncRNA:CR44752	FBgn0265965	X	off	off
lncRNA:CR44753	FBgn0265966	X	low	off
sc	FBgn0004170	X	off	off
l(1)sc	FBgn0002561	X	off	off
Pgcl	FBgn0011822	X	off	off
ase	FBgn0000137	X	off	off
Cyp4g1	FBgn0010019	X	low	off
ebo	FBgn0266572	X	low	medium
CG13373	FBgn0029522	X	medium	low
CG32817	FBgn0052817	X	low	low
CG3176	FBgn0029524	X	low	low
CG18273	FBgn0029525	X	medium	low
CG3156	FBgn0023536	X	low	off
asRNA:CR45797	FBgn0267447	X	off	off
CG17896	FBgn0023537	X	low	high
CG17778	FBgn0023534	X	off	off
svr	FBgn0004648	X	low	medium
asRNA:CR44891	FBgn0266196	X	off	off
asRNA:CR44892	FBgn0266197	X	off	off
elav	FBgn0260400	X	low	low
arg	FBgn0023535	X	off	off
lncRNA:enrr	FBgn0286870	X	off	off
CG4293	FBgn0024983	X	low	medium
Appl	FBgn0000108	X	low	off
mir-4960	FBgn0263534	X	off	off
vnd	FBgn0261930	X	off	off
spdi	FBgn0025633	X	high	medium
lncRNA:CR45474	FBgn0267030	X	low	off
CG13365	FBgn0029529	X	high	high
Vsp37A	FBgn0016038	X	medium	medium
CG13369	FBgn0025640	X	medium	medium
CG13364	FBgn0026879	X	high	high
lncRNA:CR45475	FBgn0267031	X	off	off
Hinfp	FBgn0025635	X	medium	low
RpL36	FBgn0002579	X	high	high
Mybbp1A	FBgn0001341	X	medium	medium
Dredd	FBgn0020381	X	low	medium
mir-9372	FBgn0283549	X	off	off
su(sable)	FBgn0003575	X	medium	medium
CG13367	FBgn0025634	X	low	medium
Roc1a	FBgn0025638	X	high	high
Hmt4-20	FBgn0025639	X	high	high
SkpA	FBgn0025637	X	high	high
sdk	FBgn0021764	X	high	medium
CG13362	FBgn0029531	X	off	off
CG5254	FBgn0040383	X	off	high
CG13361	FBgn0029532	X	off	off
CG5273	FBgn0040382	X	low	low
lncRNA:CR44965	FBgn0266280	X	off	off
RpL22	FBgn0015288	X	medium	high
lncRNA:CR42491	FBgn0259993	X	low	medium
snoRNA:Psi18S-531	FBgn0083027	X	off	off
snoRNA:Psi28S-2179	FBgn0086666	X	off	off
lncRNA:CR44966	FBgn0266281	X	off	off
fz3	FBgn0027343	X	off	medium
tw	FBgn0086368	X	off	off
CG13360	FBgn0025620	X	off	low
lncRNA:CR44469	FBgn0265662	X	off	off
CG16989	FBgn0025621	X	low	medium
Rbf	FBgn0015799	X	medium	medium
CG13359	FBgn0025616	X	off	off
CG13358	FBgn0026874	X	off	off
Sec22	FBgn0260855	X	medium	medium
CG43867	FBgn0264449	X	medium	low
CG14635	FBgn0029535	X	off	low
CG3713	FBgn0040343	X	off	off
CG14634	FBgn0040892	X	off	low
CG11664	FBgn0040341	X	off	off
CG11663	FBgn0029539	X	off	off
Lztr1	FBgn0040344	X	low	low
MED22	FBgn0040339	X	high	high
CG3708	FBgn0040345	X	off	off
CG3706	FBgn0040342	X	off	off
CG32815	FBgn0052815	X	low	low
TRAM	FBgn0040340	X	medium	high
CG3704	FBgn0040346	X	medium	medium
mus81	FBgn0040347	X	low	off
CG3703	FBgn0040348	X	off	off
CG3699	FBgn0040349	X	off	off
CG3690	FBgn0040350	X	off	off
lncRNA:CR45476	FBgn0267032	X	off	off
CG18823	FBgn0042146	X	low	off
TfIIA-S-2	FBgn0040338	X	high	off
CG14631	FBgn0029552	X	off	off
su(w[a])	FBgn0003638	X	medium	medium
CG11638	FBgn0040351	X	medium	off
CG32814	FBgn0052814	X	medium	off
CG3021	FBgn0040337	X	medium	medium
Cdc45	FBgn0026143	X	low	low
Rpp21	FBgn0053082	X	off	off
CG14630	FBgn0014903	X	off	off
CG42259	FBgn0266569	X	off	low
lncRNA:CR44779	FBgn0266005	X	off	off
CG14629	FBgn0040398	X	off	off
CG3655	FBgn0040397	X	high	high
CG14628	FBgn0040365	X	low	off
eIF4E7	FBgn0040368	X	off	off
CG11378	FBgn0040364	X	off	off
CG11384	FBgn0040363	X	off	off
CG11379	FBgn0040362	X	off	off
CG14627	FBgn0040361	X	off	off
CG14626	FBgn0040360	X	off	off
CG11380	FBgn0040359	X	off	off
CG14625	FBgn0040358	X	off	off
CG11381	FBgn0029568	X	off	off
CG14624	FBgn0040357	X	off	off
CG11382	FBgn0040367	X	low	off
CG11398	FBgn0040366	X	low	low
CG3638	FBgn0261444	X	medium	high
CG11403	FBgn0026876	X	medium	medium
Atf3	FBgn0028550	X	low	medium
CG32812	FBgn0025642	X	low	off
DAAM	FBgn0025641	X	low	high
CG32811	FBgn0052811	X	off	off
lncRNA:CR46248	FBgn0267970	X	off	off
fs(1)N	FBgn0004650	X	off	off
CG11409	FBgn0024366	X	low	off
Naa30A	FBgn0024362	X	medium	high
MTPAP	FBgn0024360	X	low	low
Tsp2A	FBgn0024361	X	off	off
CG12773	FBgn0024365	X	low	low
CG11417	FBgn0024364	X	medium	medium
png	FBgn0000826	X	off	off
CG14770	FBgn0029573	X	off	off
ssx	FBgn0024987	X	high	medium
mir-4961	FBgn0263552	X	off	off
AMPKalpha	FBgn0023169	X	low	medium
CG3719	FBgn0024986	X	medium	medium
CG32813	FBgn0052813	X	medium	low
Rilpl	FBgn0024985	X	medium	medium
futsch	FBgn0259108	X	low	low
Gr2a	FBgn0265139	X	off	off
CG14785	FBgn0027795	X	off	off
Lrpprc2	FBgn0027794	X	low	low
CG14787	FBgn0027793	X	off	off
Ns3	FBgn0266284	X	medium	medium
O-fut2	FBgn0027791	X	low	medium
CG14777	FBgn0026872	X	off	medium
CG14778	FBgn0029580	X	off	off
CG32808	FBgn0052808	X	off	off
pck	FBgn0013720	X	low	high
CG14780	FBgn0025383	X	off	off
Rab27	FBgn0025382	X	low	low
mei-38	FBgn0260986	X	low	low
rush	FBgn0025381	X	low	medium
sta	FBgn0003517	X	high	high
snoRNA:M	FBgn0044508	X	off	off
snoRNA:Me28S-G980	FBgn0086042	X	off	off
inc	FBgn0025394	X	high	high
Nmdar2	FBgn0053513	X	off	off
CG14795	FBgn0025393	X	low	off
Mur2B	FBgn0025390	X	low	off
sncRNA:400	FBgn0065095	X	off	off
br	FBgn0283451	X	off	high
dor	FBgn0000482	X	low	low
CG3740	FBgn0023530	X	low	low
hfw	FBgn0001189	X	low	low
CG32809	FBgn0023531	X	low	off
CG14797	FBgn0029587	X	off	off
b6	FBgn0024897	X	off	off
a6	FBgn0023130	X	low	low
CG3795	FBgn0025378	X	off	off
Scgdelta	FBgn0025391	X	off	off
prage	FBgn0283741	X	off	high
Adar	FBgn0026086	X	medium	medium
mir-981	FBgn0262178	X	off	off
CG32806	FBgn0052806	X	off	off
CG14810	FBgn0029589	X	low	off
CG14811	FBgn0029590	X	low	off
Lamtor5	FBgn0026090	X	high	high
deltaCOP	FBgn0028969	X	high	high
Gcna	FBgn0023515	X	low	low
MED18	FBgn0026873	X	medium	medium
Pex5	FBgn0023516	X	low	low
CG14803	FBgn0023513	X	low	low
Pgam5	FBgn0023517	X	medium	high
Vps26	FBgn0014411	X	medium	medium
CG14817	FBgn0026089	X	high	high
CG14805	FBgn0023514	X	medium	medium
CG14818	FBgn0026088	X	medium	high
Coa8	FBgn0029594	X	medium	medium
trr	FBgn0023518	X	medium	low
mRpL16	FBgn0023519	X	high	high
arm	FBgn0000117	X	high	high
Ldaf1	FBgn0052803	X	medium	medium
asRNA:CR45929	FBgn0267591	X	off	off
asRNA:CR43864	FBgn0264446	X	low	off
CG32801	FBgn0052801	X	off	off
Edem1	FBgn0023511	X	low	medium
mip130	FBgn0023509	X	low	low
Rbcn-3B	FBgn0023510	X	low	medium
eIF2Bepsilon	FBgn0023512	X	medium	medium
Ocrl	FBgn0023508	X	medium	medium
CG11596	FBgn0023522	X	medium	medium
CG3857	FBgn0023520	X	off	low
CG3587	FBgn0023521	X	low	low
Hr4	FBgn0264562	X	medium	off
PIG-K	FBgn0023545	X	low	medium
lncRNA:CR45478	FBgn0267034	X	off	off
mir-2496	FBgn0262297	X	off	off
east	FBgn0261954	X	high	high
Actn	FBgn0000667	X	medium	high
mir-4954	FBgn0263542	X	off	off
usp	FBgn0003964	X	low	medium
CG4313	FBgn0025632	X	off	off
CG4325	FBgn0026878	X	off	high
moody	FBgn0025631	X	off	high
Sik2	FBgn0025625	X	off	off
asRNA:CR44896	FBgn0266201	X	off	off
CG4281	FBgn0025626	X	medium	medium
CG14054	FBgn0029596	X	off	off
asRNA:CR44381	FBgn0265531	X	off	off
CG4199	FBgn0025628	X	off	high
CG4194	FBgn0025627	X	off	off
asRNA:CR44382	FBgn0265532	X	off	off
Rtca	FBgn0025630	X	medium	low
CG4045	FBgn0025629	X	medium	medium
CG4025	FBgn0025624	X	low	medium
CG16903	FBgn0040394	X	medium	medium
Unc-76	FBgn0040395	X	low	medium
csw	FBgn0000382	X	low	high
snoRNA:Me18S-C1024	FBgn0086043	X	off	off
ph-d	FBgn0004860	X	medium	medium
ph-p	FBgn0004861	X	medium	medium
D2hgdh	FBgn0023507	X	off	medium
Pgd	FBgn0004654	X	off	medium
bcn92	FBgn0013432	X	high	high
wapl	FBgn0004655	X	medium	medium
Cyp4d1	FBgn0005670	X	off	off
CG3630	FBgn0023540	X	low	off
mir-3641	FBgn0263630	X	off	off
ND-B14.5A	FBgn0025839	X	high	high
Cyp4d14	FBgn0023541	X	off	off
asRNA:CR45479	FBgn0267035	X	off	off
asRNA:CR44690	FBgn0265901	X	low	low
Cyp4d2	FBgn0011576	X	off	off
Cyp4ae1	FBgn0015036	X	off	off
pn	FBgn0003116	X	low	off
Nmd3	FBgn0023542	X	low	medium
CG17776	FBgn0040899	X	high	high
CG17777	FBgn0040900	X	off	off
CG3457	FBgn0024984	X	off	off
Mct1	FBgn0023549	X	off	high
CG14053	FBgn0029603	X	off	off
asRNA:CR43637	FBgn0263628	X	off	off
FarO	FBgn0023550	X	off	off
SmydA-8	FBgn0053548	X	off	off
Vinc	FBgn0004397	X	low	medium
CG14052	FBgn0029606	X	off	off
pcx	FBgn0003048	X	medium	medium
kz	FBgn0001330	X	medium	medium
fs(1)K10	FBgn0000810	X	low	medium
Or2a	FBgn0023523	X	low	off
crn	FBgn0000377	X	medium	medium
CG3191	FBgn0023525	X	off	off
CG3091	FBgn0029608	X	off	low
CG3078	FBgn0023524	X	off	off
temp	FBgn0027296	X	low	low
CG3071	FBgn0023527	X	medium	medium
CG2924	FBgn0023528	X	high	high
lncRNA:CR45480	FBgn0267036	X	off	off
Grp170	FBgn0023529	X	high	high
Vml	FBgn0085362	X	off	off
CG2865	FBgn0023526	X	high	medium
Raf	FBgn0003079	X	low	low
lncRNA:CR34052	FBgn0054052	X	off	off
CG14050	FBgn0040392	X	off	off
CG2854	FBgn0040391	X	off	off
lncRNA:CR33218	FBgn0053218	X	off	off
Ilp6	FBgn0044047	X	off	high
mRpL14	FBgn0040389	X	medium	high
CG2841	FBgn0003159	X	off	off
PsGEF	FBgn0264598	X	low	off
CG12496	FBgn0040385	X	off	off
CG32797	FBgn0052797	X	off	off
gt	FBgn0001150	X	off	off
tko	FBgn0003714	X	high	high
boi	FBgn0040388	X	off	low
z	FBgn0004050	X	low	medium
trol	FBgn0284408	X	low	high
mir-4955	FBgn0263531	X	off	off
Pdfr	FBgn0260753	X	low	off
Vha36-3	FBgn0040377	X	off	off
AANATL7	FBgn0040376	X	off	off
CG13760	FBgn0040375	X	low	off
wds	FBgn0040066	X	high	high
egh	FBgn0001404	X	high	high
Klp3A	FBgn0011606	X	medium	medium
Zw10	FBgn0004643	X	medium	medium
Smyd3	FBgn0011566	X	low	low
eIF3g1	FBgn0029629	X	high	high
Tsp3A	FBgn0040334	X	low	low
Seipin	FBgn0040336	X	off	low
brv3	FBgn0040333	X	off	off
Pi4KIIIalpha	FBgn0267350	X	low	medium
sgg	FBgn0003371	X	high	high
lncRNA:CR45197	FBgn0266707	X	off	off
HLH3B	FBgn0011276	X	off	off
CG2652	FBgn0025838	X	low	off
lncRNA:CR44470	FBgn0265663	X	off	off
per	FBgn0003068	X	off	off
dyw	FBgn0000092	X	off	low
Spg7	FBgn0024992	X	low	low
CG2662	FBgn0024993	X	low	low
Ugalt	FBgn0024994	X	low	low
eIF2Bbeta	FBgn0024996	X	medium	medium
CG2680	FBgn0024995	X	low	off
CG2681	FBgn0024997	X	off	off
CG2685	FBgn0024998	X	medium	medium
CG2694	FBgn0024991	X	medium	low
CG2701	FBgn0024973	X	medium	low
fs(1)Yb	FBgn0000928	X	low	medium
fs(1)Ya	FBgn0000927	X	off	off
vilya	FBgn0283545	X	medium	off
dwg	FBgn0000520	X	medium	low
ttm50	FBgn0250874	X	medium	medium
CG2712	FBgn0024975	X	low	off
crm	FBgn0000376	X	medium	low
Syx4	FBgn0024980	X	medium	off
kirre	FBgn0028369	X	low	medium
lncRNA:CR43494	FBgn0263505	X	off	off
CG32795	FBgn0040384	X	low	low
w	FBgn0003996	X	low	high
CG12498	FBgn0040356	X	off	off
CG14416	FBgn0040352	X	off	low
CG14417	FBgn0040353	X	off	off
CG14418	FBgn0040354	X	off	off
CG14419	FBgn0029639	X	off	off
CG3526	FBgn0040355	X	off	off
CG3588	FBgn0025643	X	off	off
CG14424	FBgn0025644	X	off	off
CG32793	FBgn0052793	X	off	off
CG3592	FBgn0029642	X	off	off
CG3598	FBgn0025645	X	off	off
CG14420	FBgn0029643	X	off	off
CG14421	FBgn0029644	X	off	off
CG14422	FBgn0029645	X	off	off
CG14423	FBgn0029646	X	off	off
CG17959	FBgn0029647	X	off	off
CG3603	FBgn0029648	X	off	medium
rst	FBgn0003285	X	off	medium
CG4116	FBgn0029649	X	off	off
N	FBgn0004647	X	high	high
CG18508	FBgn0028746	X	medium	low
Fcp3C	FBgn0000644	X	off	off
CG3939	FBgn0040396	X	medium	high
dnc	FBgn0000479	X	high	high
CG14265	FBgn0040393	X	off	off
ng2	FBgn0010294	X	off	off
ng3	FBgn0010295	X	off	off
ng1	FBgn0002933	X	off	off
ng4	FBgn0010296	X	off	off
Pig1	FBgn0003086	X	off	off
Sgs4	FBgn0003374	X	off	off
lncRNA:CR44886	FBgn0266180	X	off	off
CG10793	FBgn0029656	X	off	off
lncRNA:CR46243	FBgn0267963	X	off	off
lncRNA:CR44999	FBgn0266350	X	off	off
Myc	FBgn0262656	X	high	high
CG12535	FBgn0029657	X	low	low
tRNA:Gln-TTG-2-1	FBgn0052493	X	off	off
CG14269	FBgn0029658	X	off	off
CG16782	FBgn0029659	X	off	off
CG10801	FBgn0029660	X	off	off
CG16781	FBgn0029661	X	off	off
CG12206	FBgn0029662	X	off	low
CG10804	FBgn0029663	X	off	off
CG10802	FBgn0029664	X	medium	medium
CG14270	FBgn0029665	X	medium	medium
CG10803	FBgn0029666	X	high	high
Gas8	FBgn0029667	X	off	off
DIP-alpha	FBgn0052791	X	low	low
CG13021	FBgn0029669	X	low	low
lncRNA:CR34335	FBgn0267910	X	high	high
ppk8	FBgn0052792	X	off	off
CG2875	FBgn0029672	X	medium	medium
AstA-R1	FBgn0266429	X	off	off
Ilp7	FBgn0044046	X	off	off
Parg	FBgn0023216	X	low	low
Mnt	FBgn0023215	X	medium	medium
lncRNA:CR45102	FBgn0266549	X	medium	medium
Rala	FBgn0015286	X	high	high
Tlk	FBgn0283657	X	high	high
mir-4962	FBgn0263532	X	off	off
HIP-R	FBgn0029676	X	high	medium
lncRNA:CR44117	FBgn0264948	X	off	off
Crg-1	FBgn0021738	X	off	off
HIP	FBgn0260484	X	medium	medium
lncRNA:CR44118	FBgn0264949	X	off	off
fd3F	FBgn0264954	X	off	off
ec	FBgn0000542	X	off	medium
tRNA:Gln-CTG-2-1	FBgn0052785	X	off	off
tRNA:Pro-CGG-3-1	FBgn0025118	X	off	off
CG2901	FBgn0029679	X	off	off
lncRNA:roX1	FBgn0019661	X	off	high
yin	FBgn0265575	X	off	off
CG2930	FBgn0028491	X	off	off
VhaAC39-1	FBgn0285910	X	medium	high
CG15239	FBgn0029681	X	off	off
CG42541	FBgn0260658	X	off	off
CG2938	FBgn0029685	X	low	low
Glos	FBgn0029686	X	low	low
Gem4b	FBgn0052786	X	low	off
Gem4c	FBgn0052783	X	low	off
Vap33	FBgn0029687	X	high	high
lva	FBgn0029688	X	medium	high
CG6428	FBgn0029689	X	off	low
CG6414	FBgn0029690	X	off	low
asRNA:CR45481	FBgn0267037	X	low	off
lncRNA:CR43298	FBgn0262990	X	off	off
lncRNA:CR45482	FBgn0267038	X	low	off
lncRNA:CR46247	FBgn0267969	X	off	off
lncRNA:CR46349	FBgn0286029	X	off	off
CG43689	FBgn0263772	X	low	off
Cmtr1	FBgn0029693	X	medium	medium
CG15375	FBgn0029694	X	off	off
Xpac	FBgn0004832	X	medium	low
brn	FBgn0000221	X	off	off
cib	FBgn0026084	X	high	high
Nsun2	FBgn0026079	X	medium	medium
dgt4	FBgn0026085	X	medium	medium
Tip60	FBgn0026080	X	low	low
tyf	FBgn0026083	X	high	high
GlcAT-I	FBgn0066114	X	low	low
Fas2	FBgn0000635	X	high	high
CG43288	FBgn0262980	X	off	off
CG15571	FBgn0029696	X	off	off
CG15570	FBgn0029697	X	off	off
Femcoat	FBgn0041252	X	off	off
Muc4B	FBgn0052774	X	off	off
CG43134	FBgn0262608	X	off	off
CG43135	FBgn0262609	X	off	off
CG15576	FBgn0029700	X	off	off
CG12691	FBgn0029701	X	off	off
CG15572	FBgn0029702	X	off	off
lncRNA:CR45483	FBgn0267039	X	off	off
CG15577	FBgn0040904	X	off	off
CG15578	FBgn0040905	X	off	off
CG12692	FBgn0029703	X	off	off
CG15579	FBgn0040906	X	off	off
lncRNA:CR44957	FBgn0266262	X	off	off
lncRNA:CR46156	FBgn0267868	X	off	off
mei-9	FBgn0002707	X	low	low
NO66	FBgn0266570	X	high	medium
mRpL33	FBgn0040907	X	high	high
norpA	FBgn0262738	X	high	medium
CG12693	FBgn0029705	X	off	off
mir-982	FBgn0262339	X	off	off
mir-303	FBgn0262390	X	off	off
CG3626	FBgn0029706	X	off	low
mir-983-1	FBgn0262235	X	off	off
mir-983-2	FBgn0262279	X	off	off
mir-984	FBgn0262282	X	off	off
asRNA:CR43614	FBgn0263589	X	low	off
lncRNA:CR46499	FBgn0288701	X	low	off
FBgn0288701			low	off
lncRNA:CR32773	FBgn0052773	X	low	off
bi	FBgn0000179	X	off	off
CG3556	FBgn0029708	X	off	off
rb	FBgn0003210	X	medium	medium
CHOp24	FBgn0029709	X	high	high
CG3568	FBgn0029710	X	low	off
Usf	FBgn0029711	X	medium	medium
CG15912	FBgn0029712	X	low	off
CG11436	FBgn0029713	X	low	low
CG3527	FBgn0029714	X	high	high
CG11444	FBgn0029715	X	low	high
CG3546	FBgn0029716	X	off	off
CG12684	FBgn0029717	X	off	off
peb	FBgn0003053	X	high	off
Alms1b	FBgn0025387	X	off	off
Alms1a	FBgn0025388	X	low	low
pon	FBgn0025739	X	low	medium
CG3081	FBgn0025613	X	off	off
CG3062	FBgn0025612	X	off	off
HLH4C	FBgn0011277	X	off	off
mRpL30	FBgn0029718	X	high	high
Torsin	FBgn0025615	X	medium	high
Cbp80	FBgn0022942	X	medium	medium
CG15473	FBgn0029719	X	off	off
CG3009	FBgn0029720	X	off	off
fzr	FBgn0262699	X	low	low
Pp2C1	FBgn0022768	X	high	medium
ctp	FBgn0011760	X	high	high
Pdha	FBgn0028325	X	medium	high
CG7024	FBgn0029722	X	off	off
Proc-R	FBgn0029723	X	off	off
CG15472	FBgn0029724	X	off	off
Klf15	FBgn0025679	X	off	off
lncRNA:CR45515	FBgn0267071	X	off	off
CG2871	FBgn0029725	X	off	off
CG15471	FBgn0029726	X	low	low
CG6978	FBgn0029727	X	off	off
CG2861	FBgn0029728	X	medium	off
lncRNA:CR45516	FBgn0267072	X	off	off
CG12682	FBgn0029729	X	off	off
CG42594	FBgn0260971	X	off	off
lncRNA:CR43495	FBgn0263506	X	off	off
boil	FBgn0029730	X	off	off
CG6927	FBgn0029733	X	low	off
CG32772	FBgn0052772	X	medium	high
CG4041	FBgn0029736	X	low	low
CG6903	FBgn0029737	X	low	medium
hpRNA:CR46342	FBgn0285992	X	high	off
CG44774	FBgn0266000	X	high	high
Ptp4E	FBgn0004368	X	low	medium
lncRNA:CR44833	FBgn0266096	X	low	off
CG15468	FBgn0061196	X	off	off
lncRNA:CR45792	FBgn0267442	X	off	off
CG12680	FBgn0029740	X	off	off
ovo	FBgn0003028	X	high	off
CG32767	FBgn0052767	X	high	high
rg	FBgn0266098	X	off	off
CG15465	FBgn0029746	X	off	off
Rpn13R	FBgn0029745	X	off	off
CG5062	FBgn0029747	X	off	off
lncRNA:CR44834	FBgn0266097	X	off	off
CG42749	FBgn0261803	X	off	off
CG3323	FBgn0029750	X	low	off
CG17764	FBgn0029751	X	off	off
Cdk7	FBgn0263237	X	medium	medium
snf	FBgn0003449	X	high	high
TrxT	FBgn0029752	X	low	off
dhd	FBgn0011761	X	high	off
CG4198	FBgn0029753	X	off	off
CG15930	FBgn0029754	X	high	off
Sas10	FBgn0029755	X	medium	medium
Rnp4F	FBgn0014024	X	high	medium
Mcm3	FBgn0284442	X	high	medium
CG3309	FBgn0029756	X	low	off
XRCC1	FBgn0026751	X	medium	medium
CanB	FBgn0010014	X	off	off
SK	FBgn0029761	X	off	off
NAAT1	FBgn0029762	X	off	low
spoon	FBgn0263987	X	high	high
Usp16-45	FBgn0029763	X	low	medium
CG16756	FBgn0029765	X	off	off
lncRNA:CR45517	FBgn0267073	X	off	low
CG15784	FBgn0029766	X	off	high
lncRNA:CR44471	FBgn0265664	X	off	off
SPR	FBgn0029768	X	off	off
frma	FBgn0029769	X	off	off
CG32762	FBgn0052762	X	off	off
CG4151	FBgn0029770	X	off	off
lncRNA:CR45519	FBgn0267075	X	off	off
CG12730	FBgn0029771	X	off	medium
asRNA:CR45518	FBgn0267074	X	off	off
snoRNA:Psi28S-3342	FBgn0086667	X	low	medium
Vsx2	FBgn0263512	X	off	off
Vsx1	FBgn0263511	X	off	off
CG34435	FBgn0085464	X	off	off
CG34434	FBgn0250904	X	medium	off
RhoGAP5A	FBgn0029778	X	low	medium
Mlc-c	FBgn0004687	X	high	high
mir-3645	FBgn0263631	X	off	off
Pop1	FBgn0026702	X	low	low
OtopLa	FBgn0259994	X	off	off
OtopLc	FBgn0259150	X	low	off
asRNA:CR45520	FBgn0267076	X	off	off
Sirt4	FBgn0029783	X	low	low
CG4119	FBgn0028474	X	medium	medium
Rab18	FBgn0015794	X	medium	high
RpL35	FBgn0029785	X	high	high
Tre1	FBgn0046687	X	off	high
Gr5a	FBgn0003747	X	off	off
asRNA:CR44958	FBgn0266263	X	off	off
CG42449	FBgn0259926	X	off	off
PGAP1	FBgn0029789	X	off	low
asRNA:CR45525	FBgn0267081	X	off	off
cv	FBgn0000394	X	low	low
CG3149	FBgn0027564	X	low	low
lncRNA:CR42794	FBgn0261927	X	off	off
AdamTS-B	FBgn0029791	X	off	high
CG33080	FBgn0053080	X	off	low
Snx27	FBgn0052758	X	low	medium
CG15773	FBgn0029795	X	off	off
IntS6	FBgn0261383	X	medium	medium
Rtel1	FBgn0029798	X	low	off
CG15772	FBgn0029799	X	off	off
lin-52	FBgn0029800	X	medium	medium
asRNA:CR45528	FBgn0267084	X	off	off
CG15771	FBgn0029801	X	medium	medium
MAPk-Ak2	FBgn0013987	X	low	medium
CG42699	FBgn0261610	X	low	low
CG3097	FBgn0029804	X	off	off
CG42264	FBgn0259149	X	off	off
CG3108	FBgn0029807	X	off	off
CG15767	FBgn0029809	X	off	off
mir-4963	FBgn0263545	X	off	off
lncRNA:CR44832	FBgn0266095	X	off	off
CG12239	FBgn0029810	X	off	off
Cpr5C	FBgn0029811	X	off	off
Prosbeta2R1	FBgn0029812	X	low	off
lncRNA:CR45529	FBgn0267085	X	off	off
CG44329	FBgn0265417	X	off	off
AgmNAT	FBgn0029813	X	off	low
CG15765	FBgn0029814	X	off	off
lncRNA:CR43264	FBgn0262945	X	high	low
tRNA:Glu-CTC-6-1Psi	FBgn0052761	X	off	off
CG12729	FBgn0029816	X	off	off
CG43136	FBgn0262610	X	off	off
CG43137	FBgn0262611	X	low	low
CG15764	FBgn0029817	X	off	off
GAA1	FBgn0029818	X	low	medium
mof	FBgn0014340	X	medium	low
Usp30	FBgn0029819	X	low	low
CG16721	FBgn0029820	X	low	high
lncRNA:CR45668	FBgn0267228	X	off	off
Act5C	FBgn0000042	X	high	high
CG4020	FBgn0029821	X	low	off
CG12236	FBgn0029822	X	low	off
Shmt	FBgn0029823	X	high	high
asRNA:CR44108	FBgn0264939	X	off	off
CG3726	FBgn0029824	X	high	high
CG12728	FBgn0029825	X	medium	low
CG32756	FBgn0052756	X	medium	low
CG6041	FBgn0029826	X	low	low
CG32755	FBgn0052755	X	off	off
CG6048	FBgn0029827	X	off	off
CG6067	FBgn0029828	X	off	low
fs(1)M3	FBgn0005390	X	low	off
Grip	FBgn0029830	X	low	low
CG5966	FBgn0029831	X	off	off
CG4766	FBgn0027546	X	off	off
lncRNA:CR44498	FBgn0265691	X	off	off
mab-21	FBgn0029003	X	off	off
lncRNA:CR44499	FBgn0265692	X	off	off
rux	FBgn0003302	X	low	off
MCTS1	FBgn0029833	X	medium	medium
CG5937	FBgn0029834	X	off	off
CG5921	FBgn0029835	X	off	off
CG43115	FBgn0262575	X	off	off
CG5928	FBgn0029836	X	off	off
Tsp5D	FBgn0029837	X	off	off
CG4666	FBgn0029838	X	off	off
CG4660	FBgn0029839	X	off	off
raptor	FBgn0029840	X	medium	medium
Mipp2	FBgn0026060	X	off	off
asRNA:CR44959	FBgn0266264	X	off	off
Nep1	FBgn0029843	X	off	off
Ca-alpha1T	FBgn0264386	X	low	off
CG32750	FBgn0052750	X	off	off
CG32751	FBgn0052751	X	off	off
CG43090	FBgn0262536	X	off	off
vanin-like	FBgn0040069	X	off	off
Btnd	FBgn0029848	X	off	off
Efr	FBgn0029849	X	off	low
sqh	FBgn0003514	X	high	high
dtn	FBgn0262730	X	medium	medium
CG14445	FBgn0029851	X	off	off
Rbcn-3A	FBgn0023458	X	low	medium
Spx	FBgn0015818	X	medium	medium
schlank	FBgn0040918	X	high	high
CG3781	FBgn0029853	X	low	medium
Spt6	FBgn0028982	X	high	high
CG3566	FBgn0029854	X	high	high
Ubi-p5E	FBgn0086558	X	high	high
lncRNA:CR45530	FBgn0267086	X	off	off
CG11700	FBgn0029856	X	off	off
Top3beta	FBgn0026015	X	medium	high
wuho	FBgn0029857	X	medium	medium
Rpt4	FBgn0028685	X	high	high
mldr	FBgn0029858	X	off	low
CG15892	FBgn0029859	X	low	off
CG15891	FBgn0029860	X	medium	high
CG3815	FBgn0029861	X	low	low
CG12219	FBgn0043796	X	low	low
CG3823	FBgn0029863	X	off	off
CG15894	FBgn0029864	X	off	off
CG42240	FBgn0250869	X	off	low
CG3842	FBgn0029866	X	off	off
CG3847	FBgn0029867	X	medium	medium
ND-B16.6	FBgn0029868	X	high	high
kdn	FBgn0261955	X	high	high
swa	FBgn0003655	X	low	off
Marf	FBgn0029870	X	high	high
lncRNA:CR44816	FBgn0266051	X	low	low
PpV	FBgn0003139	X	high	medium
CG33664	FBgn0053664	X	off	off
CG33669	FBgn0053669	X	off	off
CG33668	FBgn0053668	X	off	off
CG42340	FBgn0259242	X	medium	off
CG33667	FBgn0053667	X	off	off
CG33666	FBgn0053666	X	off	off
CG33665	FBgn0053665	X	off	off
tRNA:Phe-GAA-1-1	FBgn0052748	X	off	off
CG3918	FBgn0029873	X	medium	medium
CG3342	FBgn0029874	X	low	low
Agxt	FBgn0014031	X	off	medium
RpL7A	FBgn0014026	X	high	high
snoRNA:Or-CD10	FBgn0065071	X	off	off
dx	FBgn0000524	X	low	medium
CG34417	FBgn0085446	X	off	high
CG17717	FBgn0029877	X	off	off
Pat1	FBgn0029878	X	high	high
lncRNA:CR43832	FBgn0264380	X	off	off
APC7	FBgn0029879	X	off	low
pigs	FBgn0029881	X	low	high
CG14443	FBgn0029880	X	low	off
lncRNA:CR44817	FBgn0266052	X	off	off
CG3226	FBgn0029882	X	high	high
Cdc7	FBgn0028360	X	medium	medium
CG3224	FBgn0029885	X	high	high
Ctr1A	FBgn0062413	X	off	medium
CG3198	FBgn0029887	X	high	high
Mcm6	FBgn0025815	X	high	medium
ND-ASHI	FBgn0029888	X	high	high
Fum1	FBgn0286222	X	medium	high
Fum2	FBgn0029890	X	off	off
Pink1	FBgn0029891	X	high	high
CG44303	FBgn0265362	X	high	off
CG3184	FBgn0029892	X	medium	low
CG14442	FBgn0029893	X	medium	high
CG14440	FBgn0029894	X	low	low
CG14441	FBgn0029895	X	high	medium
CG3168	FBgn0029896	X	off	high
lncRNA:CR43461	FBgn0263415	X	low	off
RpL17	FBgn0029897	X	high	high
snoRNA:Psi28S-3436b	FBgn0086602	X	off	off
snoRNA:Psi28S-3436a	FBgn0086668	X	off	off
snoRNA:Psi28S-1060	FBgn0083013	X	off	off
snoRNA:Psi28S-1232	FBgn0082997	X	off	off
tRNA:Phe-GAA-1-2	FBgn0052740	X	off	off
lncRNA:CR44895	FBgn0266200	X	off	off
lncRNA:CR44964	FBgn0266279	X	off	off
CG14439	FBgn0029898	X	off	off
sov	FBgn0287725	X	high	high
lncRNA:CR43496	FBgn0263507	X	low	low
Coq7	FBgn0029502	X	high	high
shf	FBgn0003390	X	off	low
C3G	FBgn0259228	X	medium	medium
pod1	FBgn0029903	X	medium	high
iav	FBgn0086693	X	off	off
Nf-YC	FBgn0029905	X	medium	medium
xit	FBgn0029906	X	off	low
Atx-1	FBgn0029907	X	off	off
nonC	FBgn0263968	X	medium	medium
mAChR-C	FBgn0029909	X	off	off
CG14435	FBgn0029911	X	low	medium
CG4557	FBgn0029912	X	low	low
Cht11	FBgn0029913	X	off	off
CG4558	FBgn0029914	X	low	low
CG14434	FBgn0029915	X	high	high
lncRNA:CR45531	FBgn0267087	X	off	low
CG43736	FBgn0263993	X	high	high
CG14431	FBgn0029922	X	off	off
Setd3	FBgn0052732	X	low	medium
CG4586	FBgn0029924	X	off	off
CG3040	FBgn0029925	X	low	medium
ogre	FBgn0004646	X	off	high
lncRNA:CR44084	FBgn0264893	X	off	off
bou	FBgn0261284	X	off	high
Inx7	FBgn0027106	X	off	low
lncRNA:CR43837	FBgn0264385	X	off	low
Inx2	FBgn0027108	X	off	high
cm	FBgn0000330	X	low	low
CG32736	FBgn0052736	X	off	off
CG42308	FBgn0259204	X	off	off
CG3032	FBgn0029928	X	off	off
CG4593	FBgn0029929	X	medium	high
CG12541	FBgn0029930	X	low	off
CG14427	FBgn0029931	X	off	off
nullo	FBgn0004143	X	off	off
CG4607	FBgn0029932	X	off	off
Sxl	FBgn0264270	X	medium	high
mir-4956	FBgn0263563	X	off	off
CG4615	FBgn0029935	X	off	low
CG4617	FBgn0029936	X	medium	low
CG8300	FBgn0029937	X	high	medium
fz4	FBgn0027342	X	low	medium
lncRNA:CR45532	FBgn0267088	X	off	off
lncRNA:CR46245	FBgn0267965	X	off	off
CG9650	FBgn0029939	X	low	off
lncRNA:CR32730	FBgn0047092	X	off	off
lncRNA:CR44357	FBgn0265457	X	off	off
CG1958	FBgn0029940	X	off	off
CG1677	FBgn0029941	X	high	high
CG2059	FBgn0029942	X	medium	medium
unc-119	FBgn0025549	X	high	high
brk	FBgn0024250	X	low	high
Atg5	FBgn0029943	X	low	low
Dok	FBgn0029944	X	medium	high
Acsf3	FBgn0029945	X	low	low
CG42780	FBgn0261848	X	off	off
CBP	FBgn0026144	X	high	low
CG15034	FBgn0029946	X	low	off
CG1999	FBgn0029947	X	off	off
CheA7a	FBgn0029948	X	off	off
CG42781	FBgn0261849	X	off	off
CG15035	FBgn0029949	X	off	off
CG32727	FBgn0265265	X	off	off
CG42246	FBgn0259098	X	off	off
CG42704	FBgn0261615	X	off	off
CG42705	FBgn0261616	X	off	off
CG34337	FBgn0085366	X	off	off
rumpel	FBgn0029950	X	off	off
CG15036	FBgn0040922	X	off	off
CG32726	FBgn0052726	X	off	off
lncRNA:CR45533	FBgn0267089	X	off	off
lncRNA:CR43199	FBgn0262828	X	off	low
CG11368	FBgn0040923	X	off	off
CG43198	FBgn0262827	X	off	off
lncRNA:CR44500	FBgn0265693	X	off	off
lncRNA:CR45534	FBgn0267090	X	off	off
lncRNA:CR43278	FBgn0262967	X	off	off
lncRNA:CR43279	FBgn0262968	X	off	off
lncRNA:CR43835	FBgn0264383	X	low	off
CG32719	FBgn0052719	X	off	off
CG43138	FBgn0262612	X	off	off
CG32720	FBgn0052720	X	low	off
lncRNA:CR44501	FBgn0265694	X	off	off
lncRNA:CR44502	FBgn0265695	X	off	off
CG11369	FBgn0029951	X	off	off
CG12689	FBgn0029952	X	off	off
ct	FBgn0004198	X	off	medium
lncRNA:CR45667	FBgn0267227	X	off	off
lncRNA:CR45666	FBgn0267226	X	off	off
lncRNA:CR45665	FBgn0267225	X	off	off
CHES-1-like	FBgn0029504	X	medium	high
lncRNA:CR43287	FBgn0262979	X	off	off
CG15478	FBgn0029955	X	off	off
Hira	FBgn0022786	X	low	low
NELF-B	FBgn0027553	X	low	off
CG12155	FBgn0029957	X	medium	low
Pdp	FBgn0029958	X	medium	low
Rab39	FBgn0029959	X	low	medium
Tom40	FBgn0016041	X	high	high
Ir7a	FBgn0029961	X	off	off
CG34338	FBgn0085367	X	off	off
CG32718	FBgn0052718	X	off	off
CARPA	FBgn0029962	X	off	off
CG10920	FBgn0029963	X	off	off
CG1409	FBgn0029964	X	off	off
Ir7b	FBgn0029965	X	off	off
dec	FBgn0000427	X	off	low
asRNA:CR43615	FBgn0263590	X	off	off
Ir7c	FBgn0029966	X	off	off
Ir7d	FBgn0259190	X	off	off
Ir7e	FBgn0259189	X	off	off
Ir7f	FBgn0259188	X	off	off
Ir7g	FBgn0029968	X	off	off
Acat1	FBgn0029969	X	off	medium
Nek2	FBgn0029970	X	off	low
CG45089	FBgn0266490	X	off	off
ND-MNLL	FBgn0029971	X	low	low
p115	FBgn0040087	X	medium	low
RpS6	FBgn0261592	X	high	high
snoRNA:Or-aca2	FBgn0082924	X	off	off
bys	FBgn0010292	X	medium	medium
dpr14	FBgn0029974	X	low	off
spidey	FBgn0029975	X	medium	high
snz	FBgn0029976	X	low	medium
hdm	FBgn0029977	X	low	off
Ykt6	FBgn0260858	X	medium	medium
mahe	FBgn0029979	X	high	off
Dhdds	FBgn0029980	X	low	low
RpS14a	FBgn0004403	X	high	high
RpS14b	FBgn0004404	X	high	high
Ubr3	FBgn0260970	X	high	high
orion	FBgn0027280	X	low	high
CG15332	FBgn0029986	X	off	off
CG15330	FBgn0029987	X	low	low
sws	FBgn0003656	X	medium	low
asRNA:CR45620	FBgn0267180	X	off	off
sn	FBgn0003447	X	high	medium
Tbh	FBgn0010329	X	low	off
CG15333	FBgn0029989	X	off	off
CG2233	FBgn0029990	X	off	low
fs(1)h	FBgn0004656	X	high	high
mys	FBgn0004657	X	medium	high
Upf2	FBgn0029992	X	medium	medium
CG1571	FBgn0029993	X	off	off
Ldsdh1	FBgn0029994	X	off	off
CG2256	FBgn0029995	X	off	off
asRNA:CR45535	FBgn0267091	X	off	off
UbcE2H	FBgn0029996	X	medium	high
CG2258	FBgn0029997	X	medium	medium
Gclc	FBgn0040319	X	low	medium
CG1575	FBgn0029999	X	low	low
CG2260	FBgn0030000	X	medium	medium
cyr	FBgn0030001	X	off	off
CG2116	FBgn0030003	X	low	medium
CG10958	FBgn0030004	X	off	off
CG2120	FBgn0030005	X	off	off
Smox	FBgn0025800	X	high	high
CG17982	FBgn0030006	X	low	medium
alpha-PheRS	FBgn0030007	X	high	high
CG2129	FBgn0030008	X	low	low
CG15336	FBgn0030009	X	off	off
CG10959	FBgn0030010	X	low	off
Gbeta5	FBgn0030011	X	low	off
CG18262	FBgn0030012	X	low	low
Traf6	FBgn0265464	X	low	low
GIIIspla2	FBgn0030013	X	low	low
CG15337	FBgn0030014	X	off	off
CG10761	FBgn0030015	X	off	off
lncRNA:CR45536	FBgn0267096	X	off	off
Or7a	FBgn0030016	X	off	off
CG2278	FBgn0030017	X	off	off
slpr	FBgn0030018	X	high	medium
sdt	FBgn0261873	X	low	medium
CG2147	FBgn0030025	X	high	high
sni	FBgn0030026	X	medium	medium
Trxr1	FBgn0020653	X	high	high
ND-75	FBgn0017566	X	high	high
CG1632	FBgn0030027	X	off	off
Corp	FBgn0030028	X	medium	off
CG15343	FBgn0030029	X	off	off
CG1636	FBgn0030030	X	low	medium
nAChRalpha3	FBgn0015519	X	off	off
lncRNA:CR43695	FBgn0263778	X	off	off
CG1387	FBgn0030033	X	off	off
CG10555	FBgn0030034	X	medium	high
PIG-T	FBgn0030035	X	medium	high
lawc	FBgn0262976	X	low	medium
Trf2	FBgn0261793	X	high	high
CG32712	FBgn0052712	X	off	off
Miga	FBgn0030037	X	medium	low
CG1440	FBgn0030038	X	medium	high
CG12123	FBgn0030039	X	low	low
org-1	FBgn0021767	X	off	off
CG32713	FBgn0052713	X	off	off
CG15347	FBgn0030040	X	off	off
Es2	FBgn0023506	X	low	low
Sptr	FBgn0014032	X	off	low
CG33223	FBgn0053223	X	off	off
CG12116	FBgn0030041	X	low	off
Cp7Fa	FBgn0014464	X	off	off
Cp7Fb	FBgn0014465	X	off	off
Cp7Fc	FBgn0014466	X	off	off
Cp36	FBgn0000359	X	off	off
Cp38	FBgn0000360	X	off	off
lncRNA:CR43834	FBgn0264382	X	off	off
otu	FBgn0003023	X	medium	off
CG33181	FBgn0053181	X	medium	off
Nrg	FBgn0264975	X	high	high
PIP82	FBgn0024943	X	off	off
IntS4	FBgn0026679	X	low	low
CG12112	FBgn0030048	X	low	medium
Trf4-1	FBgn0030049	X	high	high
asRNA:CR46195	FBgn0267914	X	off	off
CG12111	FBgn0030050	X	off	off
spirit	FBgn0030051	X	off	off
CG12065	FBgn0030052	X	low	high
CG12081	FBgn0030053	X	medium	medium
CG12659	FBgn0040929	X	low	low
Crag	FBgn0025864	X	medium	high
Caf1-180	FBgn0030054	X	high	medium
oc	FBgn0004102	X	off	low
Rubicon	FBgn0030055	X	low	low
CAH3	FBgn0030056	X	medium	high
Ppt1	FBgn0030057	X	low	high
Ogg1	FBgn0027864	X	low	low
CG11294	FBgn0030058	X	low	off
lncRNA:CR44507	FBgn0265700	X	off	off
lncRNA:CR44508	FBgn0265701	X	off	off
Hexo2	FBgn0041629	X	off	high
CG2004	FBgn0030060	X	medium	medium
CG1785	FBgn0030061	X	high	medium
l(1)G0020	FBgn0027330	X	medium	medium
CG1789	FBgn0030063	X	high	high
lncRNA:CR43297	FBgn0262989	X	off	off
Lim1	FBgn0026411	X	off	off
lncRNA:CR45537	FBgn0267097	X	off	off
CG12075	FBgn0030065	X	off	off
Moe	FBgn0011661	X	high	high
Uros1	FBgn0030066	X	low	off
Rbm13	FBgn0030067	X	medium	medium
e(r)	FBgn0011586	X	high	high
rdgA	FBgn0261549	X	medium	medium
lncRNA:CR44111	FBgn0264942	X	off	off
CG12661	FBgn0030071	X	off	off
CG43255	FBgn0262900	X	off	off
mir-4964	FBgn0263519	X	off	off
lncRNA:CR43836	FBgn0264384	X	off	off
CG10962	FBgn0030073	X	off	off
CG12662	FBgn0030074	X	off	off
mir-31b	FBgn0262369	X	off	off
Nost	FBgn0259734	X	low	low
CG15365	FBgn0030077	X	off	medium
CG10970	FBgn0030078	X	off	off
asRNA:CR45538	FBgn0267098	X	off	off
CG44325	FBgn0265413	X	off	high
CG7246	FBgn0030081	X	medium	low
HP1b	FBgn0030082	X	low	medium
APC4	FBgn0052707	X	low	low
CG32708	FBgn0052708	X	medium	medium
CG32706	FBgn0052706	X	medium	low
CG6999	FBgn0030085	X	low	off
CCT2	FBgn0030086	X	high	high
mir-13b-2	FBgn0262421	X	off	off
CG7766	FBgn0030087	X	medium	medium
Bx42	FBgn0004856	X	medium	medium
Arfrp1	FBgn0030088	X	medium	low
AP-1gamma	FBgn0030089	X	high	high
lncRNA:CR45539	FBgn0267099	X	off	off
fend	FBgn0030090	X	medium	high
lncRNA:CR44517	FBgn0265710	X	off	low
CG7065	FBgn0030091	X	medium	high
fh	FBgn0030092	X	low	medium
Bap111	FBgn0030093	X	medium	medium
His3.3B	FBgn0004828	X	high	high
Ost48	FBgn0014868	X	high	high
Dlip1	FBgn0040467	X	low	low
CG9034	FBgn0040931	X	high	high
Zpr1	FBgn0030096	X	low	low
CG44532	FBgn0265725	X	medium	off
mei-P26	FBgn0026206	X	high	medium
CG12115	FBgn0030097	X	off	off
CG12057	FBgn0030098	X	off	off
CG12056	FBgn0030099	X	low	low
CG12106	FBgn0030100	X	low	low
CG12118	FBgn0030101	X	medium	medium
su(r)	FBgn0086450	X	off	off
SmydA-9	FBgn0030102	X	off	off
Obp8a	FBgn0030103	X	off	off
CG15368	FBgn0030104	X	off	off
CG15369	FBgn0030105	X	off	off
t	FBgn0086367	X	off	off
CG15370	FBgn0030107	X	off	off
Gr8a	FBgn0030108	X	off	off
CG12121	FBgn0030109	X	medium	high
Ir8a	FBgn0052704	X	off	off
mir-4916	FBgn0263578	X	off	off
mxc	FBgn0260789	X	high	medium
Larp7	FBgn0260771	X	low	low
amx	FBgn0000077	X	low	low
Dsor1	FBgn0010269	X	medium	low
CG17754	FBgn0030114	X	low	low
ric8a	FBgn0028292	X	low	medium
Erk7	FBgn0052703	X	off	off
CG17440	FBgn0030120	X	off	off
Cfp1	FBgn0030121	X	low	low
Aladin	FBgn0030122	X	medium	low
snoRNA:CG16892-a	FBgn0263475	X	off	off
c11.1	FBgn0040236	X	low	medium
lz	FBgn0002576	X	off	off
lncRNA:CR44534	FBgn0265727	X	off	off
c12.1	FBgn0040235	X	high	high
c12.2	FBgn0040234	X	off	low
Zdhhc8	FBgn0085478	X	medium	high
CG34450	FBgn0085479	X	off	off
BCL7-like	FBgn0026149	X	medium	high
mgl	FBgn0261260	X	off	high
CG44815	FBgn0266050	X	off	off
CG32700	FBgn0267253	X	off	off
CG34028	FBgn0054028	X	off	off
CG34026	FBgn0054026	X	off	off
l(1)G0320	FBgn0028327	X	medium	high
RpS28b	FBgn0030136	X	high	high
CG15317	FBgn0030137	X	low	medium
lncRNA:CR42767	FBgn0261835	X	low	off
Cubn	FBgn0052702	X	off	low
LPCAT	FBgn0052699	X	low	high
CG42395	FBgn0259741	X	off	off
lncRNA:CR45540	FBgn0267100	X	off	off
lncRNA:CR45541	FBgn0267101	X	off	off
Hex-A	FBgn0001186	X	medium	high
lncRNA:CR45542	FBgn0267102	X	off	off
lncRNA:CR45543	FBgn0267103	X	off	off
Gga	FBgn0030141	X	low	medium
Lst8	FBgn0264691	X	medium	medium
LysRS	FBgn0027084	X	high	high
Hecw	FBgn0261931	X	low	low
Ptpmeg2	FBgn0028341	X	low	medium
CG3106	FBgn0030148	X	off	off
nej	FBgn0261617	X	high	high
lncRNA:CR42657	FBgn0261522	X	off	off
lncRNA:CR44016	FBgn0264786	X	off	off
btd	FBgn0000233	X	off	off
lncRNA:CR43498	FBgn0263509	X	off	off
Sp1	FBgn0020378	X	off	off
CG1354	FBgn0030151	X	medium	high
CARPB	FBgn0052698	X	off	off
Ser7	FBgn0019929	X	off	low
CG45060	FBgn0266430	X	off	off
CG45061	FBgn0266431	X	off	off
CG32695	FBgn0052695	X	off	off
CG15247	FBgn0030156	X	off	off
CG1468	FBgn0030157	X	off	low
CG9686	FBgn0030158	X	off	medium
CG9689	FBgn0030159	X	off	low
CG9691	FBgn0030160	X	off	high
CG15249	FBgn0030161	X	off	off
CG1986	FBgn0030162	X	off	off
Idgf4	FBgn0026415	X	off	off
snoRNA:Me28S-U1688	FBgn0086044	X	off	off
CG1791	FBgn0030163	X	off	off
CG1889	FBgn0030164	X	off	off
CG43386	FBgn0263216	X	off	off
CG15252	FBgn0030167	X	off	off
CG32694	FBgn0052694	X	off	off
CG33557	FBgn0053557	X	off	off
Dna2	FBgn0288690	X	low	off
Cht6	FBgn0263132	X	off	off
asRNA:CR45185	FBgn0267495	X	off	off
Yp2	FBgn0005391	X	off	off
Yp1	FBgn0004045	X	off	off
asRNA:CR45601	FBgn0267161	X	off	off
CG15312	FBgn0030174	X	low	off
Gr9a	FBgn0052693	X	off	off
lncRNA:CR45602	FBgn0267162	X	off	off
ZAP3	FBgn0052685	X	high	high
CG2972	FBgn0030177	X	medium	medium
Naxe	FBgn0030178	X	low	low
RhoU	FBgn0083940	X	low	off
asRNA:CR44894	FBgn0266199	X	off	off
snoRNA:Me18S-A627	FBgn0086045	X	off	off
CG12645	FBgn0030181	X	off	off
CG43902	FBgn0264503	X	off	low
lncRNA:CR32690	FBgn0052690	X	off	off
Ypel	FBgn0030183	X	medium	medium
lncRNA:CR43899	FBgn0264500	X	low	off
ATPsyndelta	FBgn0028342	X	high	high
CG2962	FBgn0030186	X	off	off
asRNA:CR45629	FBgn0267189	X	off	off
CG15308	FBgn0040941	X	off	off
CG34408	FBgn0085437	X	low	low
CG2961	FBgn0030187	X	off	off
Hk	FBgn0263220	X	low	off
asRNA:CR43959	FBgn0264674	X	off	off
CG12643	FBgn0040942	X	off	low
alpha-Man-Ia	FBgn0259170	X	medium	high
CG2909	FBgn0030189	X	low	low
Gip	FBgn0011770	X	medium	medium
CG15306	FBgn0030191	X	off	off
CG43740	FBgn0263997	X	off	off
snoRNA:U3:9B	FBgn0065046	X	off	off
l(1)G0289	FBgn0028331	X	medium	high
CG32679	FBgn0052679	X	low	off
CG17841	FBgn0028480	X	low	medium
CG32686	FBgn0052686	X	off	off
CG2898	FBgn0030195	X	off	off
CG32681	FBgn0052681	X	off	low
Psf3	FBgn0030196	X	medium	medium
flw	FBgn0000711	X	high	high
CG32683	FBgn0052683	X	off	off
RabX2	FBgn0030200	X	off	off
CG12640	FBgn0030202	X	off	off
snoRNA:Me28S-A1705	FBgn0086046	X	off	off
Or9a	FBgn0030204	X	off	off
Neb-cGP	FBgn0083167	X	high	high
nocte	FBgn0261710	X	high	high
CG2889	FBgn0030206	X	low	low
CG2887	FBgn0030207	X	low	off
PPP4R2r	FBgn0030208	X	medium	high
CG32687	FBgn0052687	X	off	medium
spri	FBgn0085443	X	low	high
CG15296	FBgn0030215	X	off	off
Rab9D	FBgn0067052	X	off	off
Hmr	FBgn0001206	X	medium	low
CG2124	FBgn0030217	X	low	low
CG1628	FBgn0030218	X	off	medium
CG43347	FBgn0263072	X	off	off
Rab9Db	FBgn0030221	X	off	off
CG9806	FBgn0030222	X	off	off
X11Lbeta	FBgn0052677	X	low	off
CG2111	FBgn0030223	X	off	off
Rab9E	FBgn0052673	X	off	off
CG12637	FBgn0030224	X	low	low
stx	FBgn0052676	X	high	high
ras	FBgn0003204	X	medium	high
lncRNA:CR44766	FBgn0265987	X	off	off
Rph	FBgn0030230	X	low	off
Tango5	FBgn0052675	X	low	high
Atg8a	FBgn0052672	X	high	high
BTBD9	FBgn0030228	X	low	low
CG15211	FBgn0030234	X	off	off
Ant2	FBgn0025111	X	high	off
sesB	FBgn0003360	X	high	high
Imp	FBgn0285926	X	high	high
lncRNA:CR45204	FBgn0266731	X	off	off
lncRNA:CR45624	FBgn0267184	X	off	off
sbr	FBgn0003321	X	medium	high
CG15210	FBgn0040850	X	off	off
CG15209	FBgn0030237	X	off	low
CG32669	FBgn0052669	X	off	off
Pgls	FBgn0030239	X	medium	medium
CG2202	FBgn0030240	X	off	low
feo	FBgn0030241	X	high	high
sofe	FBgn0030242	X	low	low
CG2186	FBgn0030243	X	low	medium
CG2157	FBgn0030244	X	off	off
CG1637	FBgn0030245	X	low	medium
Ork1	FBgn0017561	X	off	off
lncRNA:CR45616	FBgn0267176	X	off	off
lncRNA:CR45617	FBgn0267177	X	off	off
lncRNA:CR44524	FBgn0265717	X	off	off
CG1582	FBgn0030246	X	medium	low
CG15208	FBgn0030247	X	off	off
CG43901	FBgn0264502	X	off	off
v	FBgn0003965	X	off	off
CG2145	FBgn0030251	X	off	off
Myo10A	FBgn0263705	X	off	off
Rab9Fa	FBgn0052671	X	off	off
Rab9Fb	FBgn0052670	X	off	off
C901	FBgn0021742	X	off	off
CG42339	FBgn0259241	X	off	off
SmydA-4	FBgn0030257	X	off	off
CG1552	FBgn0030258	X	off	off
CG1545	FBgn0030259	X	off	off
CG1537	FBgn0030260	X	off	off
lncRNA:CR45614	FBgn0267174	X	off	off
CG15203	FBgn0030261	X	off	off
sev	FBgn0003366	X	off	high
asRNA:CR44358	FBgn0265458	X	off	off
asRNA:CR45604	FBgn0267164	X	off	low
Vago	FBgn0030262	X	off	high
CG2076	FBgn0030263	X	high	high
CG2061	FBgn0027498	X	low	low
CG42249	FBgn0259101	X	off	off
Hsp60A	FBgn0015245	X	high	high
CG11122	FBgn0030266	X	medium	medium
Rpt3	FBgn0028686	X	high	high
SrpRalpha	FBgn0010391	X	high	high
Klp10A	FBgn0030268	X	high	medium
CG44385	FBgn0265535	X	off	off
CDK2AP1	FBgn0030269	X	medium	medium
asRNA:CR44054	FBgn0264863	X	off	off
ssp7	FBgn0052667	X	low	medium
CG15199	FBgn0030270	X	off	off
CG15202	FBgn0030271	X	off	off
CG15201	FBgn0030272	X	off	low
Ran	FBgn0020255	X	high	high
Lint-1	FBgn0030274	X	low	low
rtv	FBgn0261277	X	off	off
Dlic	FBgn0030276	X	medium	high
CG32668	FBgn0052668	X	off	off
Antdh	FBgn0026268	X	off	off
CG1394	FBgn0030277	X	low	off
CG15200	FBgn0030278	X	off	off
lncRNA:CR44765	FBgn0265986	X	off	off
CG11106	FBgn0030280	X	low	off
CG44422	FBgn0265595	X	off	off
CG15198	FBgn0030283	X	off	low
Ir10a	FBgn0083979	X	off	off
sisA	FBgn0003411	X	off	off
l(1)10Bb	FBgn0001491	X	medium	medium
Gapvd1	FBgn0030286	X	low	low
Kap3	FBgn0028421	X	low	low
CG34348	FBgn0085377	X	low	medium
GCS1	FBgn0030289	X	low	low
CG11756	FBgn0030290	X	off	off
CG1738	FBgn0030291	X	medium	low
CG11752	FBgn0030292	X	high	high
CG1737	FBgn0030293	X	high	high
dsh	FBgn0000499	X	medium	medium
Pa1	FBgn0287454	X	high	medium
hop	FBgn0004864	X	medium	medium
Tim8	FBgn0027359	X	high	high
dlg1	FBgn0001624	X	high	high
CG15196	FBgn0030296	X	off	off
Gr10b	FBgn0030297	X	off	off
Gr10a	FBgn0045502	X	off	off
Or10a	FBgn0030298	X	off	off
Gs2	FBgn0001145	X	off	off
Evi5	FBgn0262740	X	medium	medium
Sk1	FBgn0030300	X	off	medium
HP5	FBgn0030301	X	medium	medium
CG43155	FBgn0262685	X	off	off
Cyp4g15	FBgn0030304	X	off	off
Uba5	FBgn0030305	X	medium	medium
Spase25	FBgn0030306	X	high	high
CG33235	FBgn0030307	X	off	off
lncRNA:CR44556	FBgn0265749	X	off	off
Drak	FBgn0052666	X	medium	high
mir-2492	FBgn0262335	X	off	off
CG1572	FBgn0030309	X	off	high
PGRP-SA	FBgn0030310	X	off	off
Polr2A	FBgn0003277	X	high	high
asRNA:CR44266	FBgn0265252	X	off	off
CG11699	FBgn0030311	X	high	high
Kmn1	FBgn0027259	X	low	low
Reepl1	FBgn0030313	X	off	off
CG11696	FBgn0030314	X	low	low
e(y)2	FBgn0000618	X	high	high
CG11695	FBgn0030316	X	low	low
lncRNA:roX2	FBgn0019660	X	off	high
nod	FBgn0002948	X	off	low
pkm	FBgn0030317	X	off	off
rho-4	FBgn0030318	X	medium	high
CG2533	FBgn0030319	X	off	off
CG2247	FBgn0030320	X	high	medium
CG1703	FBgn0030321	X	high	high
RPA3	FBgn0288833	X	high	high
Met	FBgn0002723	X	medium	medium
Ptp10D	FBgn0004370	X	medium	high
Vlet	FBgn0030323	X	low	low
bif	FBgn0014133	X	medium	high
PhKgamma	FBgn0011754	X	medium	medium
CG2444	FBgn0030326	X	off	off
FucT6	FBgn0030327	X	low	low
Amun	FBgn0030328	X	high	high
mir-9370	FBgn0283637	X	off	off
lncRNA:CR45618	FBgn0267178	X	off	off
prtp	FBgn0030329	X	low	medium
Tango10	FBgn0030330	X	medium	low
CG15221	FBgn0030331	X	off	off
inaF-B	FBgn0259918	X	off	off
inaF-D	FBgn0260812	X	low	off
inaF-A	FBgn0085351	X	off	off
inaF-C	FBgn0085350	X	off	off
m	FBgn0002577	X	off	off
CG9360	FBgn0030332	X	off	medium
dy	FBgn0004511	X	off	off
Karl	FBgn0030334	X	off	off
asRNA:CR44962	FBgn0266277	X	off	off
CkIIbeta	FBgn0000259	X	high	high
Hsc70-3	FBgn0001218	X	high	high
CG1578	FBgn0030336	X	medium	high
rudhira	FBgn0266019	X	high	high
CG15741	FBgn0030338	X	off	off
asRNA:CR43908	FBgn0264509	X	off	off
Cyp28c1	FBgn0030339	X	off	off
CG15740	FBgn0030340	X	off	off
lncRNA:CR45619	FBgn0267179	X	off	off
p24-1	FBgn0030341	X	medium	medium
CG10347	FBgn0030342	X	low	low
ATP7	FBgn0030343	X	low	low
Nrd1	FBgn0030344	X	medium	medium
CG1847	FBgn0030345	X	low	low
BORCS5	FBgn0030346	X	low	low
CG15739	FBgn0030347	X	off	low
CG10352	FBgn0030348	X	off	off
CG10353	FBgn0030349	X	low	medium
SelG	FBgn0030350	X	medium	medium
CG1840	FBgn0030351	X	low	medium
sicily	FBgn0030352	X	medium	medium
wisp	FBgn0260780	X	off	off
Upf1	FBgn0030354	X	medium	medium
CG43156	FBgn0262686	X	off	off
pot	FBgn0250871	X	off	off
lncRNA:CR32661	FBgn0030356	X	off	off
lncRNA:CR43157	FBgn0262687	X	low	off
Sclp	FBgn0030357	X	off	low
lncRNA:CR32660	FBgn0052660	X	off	off
CG10362	FBgn0030358	X	off	off
cac	FBgn0263111	X	medium	low
gd	FBgn0000808	X	off	off
tsg	FBgn0003865	X	off	off
CG18130	FBgn0030359	X	low	off
fw	FBgn0001083	X	off	off
CG1806	FBgn0030360	X	off	off
CG1492	FBgn0030361	X	off	off
regucalcin	FBgn0030362	X	off	off
Chrac-16	FBgn0043001	X	low	medium
Lsm12a	FBgn0030364	X	high	high
Tango4	FBgn0030365	X	medium	medium
Usp7	FBgn0030366	X	high	high
Cyp311a1	FBgn0030367	X	off	off
Cyp318a1	FBgn0030369	X	off	off
Ten-a	FBgn0267001	X	low	high
lncRNA:CR43960	FBgn0264675	X	off	off
Uch-L5R	FBgn0030370	X	off	off
Muc11A	FBgn0052656	X	off	off
lncRNA:CR43961	FBgn0264676	X	low	off
CG34323	FBgn0085352	X	high	off
moon	FBgn0030373	X	medium	off
CG15734	FBgn0030374	X	off	off
lncRNA:CR32657	FBgn0052657	X	low	off
lncRNA:CR32658	FBgn0040859	X	low	off
CG11356	FBgn0030375	X	off	off
CG2750	FBgn0030376	X	off	off
CG1924	FBgn0030377	X	off	off
CG32655	FBgn0052655	X	off	off
CG45603	FBgn0267163	X	off	off
CG2577	FBgn0030384	X	off	off
Ir11a	FBgn0030385	X	off	off
CG32651	FBgn0052651	X	off	off
CG2574	FBgn0030386	X	off	off
lncRNA:CR32652	FBgn0052652	X	low	off
Pkcdelta	FBgn0287828	X	off	off
CG15927	FBgn0030389	X	off	off
lncRNA:CR45615	FBgn0267175	X	off	off
CG15731	FBgn0030390	X	off	off
Rab40	FBgn0030391	X	medium	medium
CG42258	FBgn0259143	X	medium	low
Cpr11A	FBgn0030394	X	off	off
Lsp1alpha	FBgn0002562	X	off	off
Mks1	FBgn0030395	X	off	off
CG2556	FBgn0030396	X	low	off
snoRNA:Me18S-G894	FBgn0086047	X	off	off
hwt	FBgn0264542	X	low	off
Cpr11B	FBgn0030398	X	off	off
Pits	FBgn0030400	X	high	high
LIMK1	FBgn0283712	X	medium	low
CG1824	FBgn0030403	X	low	low
Sec16	FBgn0052654	X	medium	medium
CG1463	FBgn0030406	X	low	low
Fpgs	FBgn0030407	X	off	low
asRNA:CR45621	FBgn0267181	X	off	off
CG11085	FBgn0030408	X	off	off
lncRNA:CR44568	FBgn0265761	X	off	off
CG15728	FBgn0030409	X	off	off
Aven	FBgn0030410	X	low	low
CG2540	FBgn0030411	X	low	off
Tomosyn	FBgn0030412	X	low	medium
mir-970	FBgn0262187	X	off	off
CkIalpha	FBgn0015024	X	high	high
Tis11	FBgn0011837	X	high	high
lncRNA:CR33963	FBgn0053963	X	low	high
mir-9377	FBgn0283559	X	off	off
lncRNA:SMRG	FBgn0286868	X	off	off
Smr	FBgn0265523	X	high	high
CG15725	FBgn0030417	X	off	low
lncRNA:CR43963	FBgn0264678	X	medium	off
asRNA:CR45623	FBgn0267183	X	off	off
CG4004	FBgn0030418	X	medium	medium
lncRNA:CR44619	FBgn0265830	X	off	off
Paics	FBgn0020513	X	medium	high
pira	FBgn0030420	X	off	low
Agpat1	FBgn0030421	X	medium	off
CG32647	FBgn0052647	X	off	off
Pde9	FBgn0259171	X	medium	high
Nep6	FBgn0030425	X	off	off
CG4661	FBgn0030429	X	off	low
CG32650	FBgn0052650	X	low	off
Coq8	FBgn0052649	X	low	medium
CG4407	FBgn0030431	X	medium	medium
CG4404	FBgn0030432	X	low	off
mRpL49	FBgn0030433	X	high	high
Brms1	FBgn0030434	X	medium	low
CG4645	FBgn0030435	X	low	low
lncRNA:CR45625	FBgn0267185	X	off	off
lncRNA:CR45626	FBgn0267186	X	off	off
fne	FBgn0086675	X	off	off
hec	FBgn0030437	X	off	off
CG32642	FBgn0052642	X	off	off
Mur11Da	FBgn0052644	X	off	off
asRNA:CR43636	FBgn0263627	X	off	off
CG15721	FBgn0030438	X	off	off
asRNA:CR43152	FBgn0262682	X	off	off
CG12716	FBgn0030439	X	off	off
CG32643	FBgn0052643	X	off	off
rad	FBgn0265597	X	off	off
CG15719	FBgn0030440	X	off	off
CG2209	FBgn0030441	X	off	off
CG12715	FBgn0030443	X	off	off
asRNA:CR44840	FBgn0266114	X	off	off
mir-971	FBgn0262222	X	off	off
hep	FBgn0010303	X	medium	medium
lic	FBgn0261524	X	medium	medium
CG2200	FBgn0030447	X	off	medium
Chpf	FBgn0263005	X	medium	medium
Fer3HCH	FBgn0030449	X	off	off
CG42237	FBgn0250862	X	off	off
CG32638	FBgn0052638	X	off	low
sncRNA:204	FBgn0065101	X	off	off
CG15717	FBgn0030451	X	low	medium
MFS10	FBgn0030452	X	off	off
CG32645	FBgn0052645	X	off	off
CG4318	FBgn0030455	X	low	off
CG4332	FBgn0030456	X	low	medium
Bap60	FBgn0025463	X	high	medium
CG12096	FBgn0030457	X	medium	low
Lgr4	FBgn0085440	X	off	off
CG32640	FBgn0052640	X	off	off
CG32641	FBgn0052641	X	off	medium
CG12723	FBgn0030459	X	off	off
Coq5	FBgn0030460	X	low	low
sno	FBgn0265630	X	high	high
CG44437	FBgn0265629	X	off	off
REG	FBgn0029133	X	high	high
mew	FBgn0004456	X	off	high
CG32639	FBgn0052639	X	off	off
CG15742	FBgn0030462	X	off	off
comt	FBgn0000346	X	low	low
HDAC4	FBgn0041210	X	high	high
CG15743	FBgn0030465	X	low	low
CG15744	FBgn0030466	X	low	low
CG1764	FBgn0030467	X	low	low
CG1622	FBgn0030468	X	medium	medium
IP3K2	FBgn0283680	X	off	high
lncRNA:CR45018	FBgn0266376	X	off	medium
Prx2	FBgn0040309	X	high	high
lncRNA:CR32636	FBgn0052636	X	off	low
RpS15Aa	FBgn0010198	X	high	high
CG15747	FBgn0030474	X	medium	medium
lncRNA:CR45708	FBgn0267272	X	off	off
lncRNA:CR45709	FBgn0267273	X	off	off
Syt12	FBgn0261085	X	off	off
dmrt11E	FBgn0030477	X	off	off
CG1640	FBgn0030478	X	medium	medium
Rbp1-like	FBgn0030479	X	low	medium
Tim9a	FBgn0030480	X	high	high
Ype	FBgn0288857	X	low	medium
CG1662	FBgn0030481	X	low	low
lncRNA:CR44620	FBgn0265831	X	off	off
lncRNA:CR44621	FBgn0265832	X	off	off
Bcat	FBgn0030482	X	off	medium
CG12725	FBgn0030483	X	off	off
GstT4	FBgn0030484	X	off	high
CG1998	FBgn0030485	X	low	low
Set2	FBgn0030486	X	medium	medium
Neto	FBgn0265416	X	off	off
CG34324	FBgn0085353	X	off	off
CG15754	FBgn0030492	X	off	off
asRNA:CR44427	FBgn0265609	X	off	off
CG44428	FBgn0265610	X	off	off
CG15756	FBgn0030493	X	off	off
Cpr12A	FBgn0030494	X	off	off
CG11816	FBgn0030495	X	off	off
CG32631	FBgn0052631	X	off	off
CG32633	FBgn0052633	X	off	off
Tpst	FBgn0086674	X	medium	low
CG46311	FBgn0284227	X	off	off
up	FBgn0004169	X	off	off
lncRNA:CR44654	FBgn0265865	X	off	off
CG11178	FBgn0030499	X	low	low
Ndc80	FBgn0030500	X	medium	medium
BthD	FBgn0030501	X	high	medium
tth	FBgn0030502	X	medium	high
Tango2	FBgn0030503	X	medium	low
CG2691	FBgn0030504	X	medium	medium
NFAT	FBgn0030505	X	high	high
DNAlig4	FBgn0030506	X	low	off
CG11164	FBgn0030507	X	low	low
CG15760	FBgn0030508	X	off	off
CG11162	FBgn0030509	X	off	off
CG12177	FBgn0030510	X	off	low
CG11158	FBgn0030511	X	off	low
Nadsyn	FBgn0030512	X	medium	high
Nna1	FBgn0265726	X	off	off
Mrgn1	FBgn0030514	X	medium	medium
mus101	FBgn0002878	X	medium	low
g	FBgn0001087	X	low	high
Grip91	FBgn0001612	X	medium	medium
CG11134	FBgn0030518	X	medium	medium
CG11151	FBgn0030519	X	medium	high
lncRNA:CR42861	FBgn0262108	X	low	medium
Pdcd4	FBgn0030520	X	high	high
asRNA:CR43833	FBgn0264381	X	off	off
CG32625	FBgn0052625	X	high	low
Rtc1	FBgn0020909	X	medium	low
Yp3	FBgn0004047	X	off	low
rdgB	FBgn0003218	X	medium	low
CtsB	FBgn0030521	X	medium	high
amrt	FBgn0030522	X	low	low
inaE	FBgn0261244	X	medium	high
CG10993	FBgn0030524	X	off	off
CG10996	FBgn0030525	X	off	off
CG11095	FBgn0030528	X	low	low
Clic	FBgn0030529	X	high	high
Nup93-1	FBgn0027537	X	medium	medium
jub	FBgn0030530	X	medium	medium
AMPdeam	FBgn0052626	X	medium	high
mamo	FBgn0267033	X	high	low
CG11068	FBgn0030536	X	off	off
lncRNA:CR44655	FBgn0265866	X	off	off
ben	FBgn0000173	X	high	high
Ste12DOR	FBgn0044817	X	off	off
tRNA:Arg-TCG-2-1	FBgn0011952	X	off	off
tRNA:Ser-CGA-1-1	FBgn0011975	X	off	off
tRNA:Ser-CGA-1-2	FBgn0011976	X	off	off
tRNA:Arg-TCG-3-1	FBgn0011948	X	off	off
tRNA:Arg-TCG-3-2	FBgn0011949	X	off	off
tRNA:Arg-TCG-3-3	FBgn0011950	X	off	off
tRNA:Arg-TCG-3-4	FBgn0011951	X	off	off
tRNA:Ser-AGA-3-1	FBgn0011980	X	off	off
tRNA:Ser-AGA-2-1	FBgn0011982	X	off	off
Ste:CG33247	FBgn0053247	X	off	off
Ste:CG33246	FBgn0053246	X	off	off
Ste:CG33245	FBgn0053245	X	off	off
Ste:CG33244	FBgn0053244	X	off	off
Ste:CG33243	FBgn0053243	X	off	off
Ste:CG33242	FBgn0053242	X	off	off
Ste:CG33241	FBgn0053241	X	off	off
Ste:CG33240	FBgn0053240	X	off	off
Ste:CG33239	FBgn0053239	X	off	off
Ste:CG33238	FBgn0053238	X	off	off
Ste:CG33237	FBgn0053237	X	off	off
Ste:CG33236	FBgn0053236	X	off	off
tRNA:Ser-AGA-1-1	FBgn0011974	X	off	off
lncRNA:CR46242	FBgn0267962	X	off	off
tRNA:Ser-CGA-1-3	FBgn0011977	X	off	off
tRNA:Arg-TCG-1-1	FBgn0011953	X	off	off
tRNA:Ser-AGA-3-2	FBgn0011981	X	off	off
lncRNA:CR44657	FBgn0265868	X	off	off
tRNA:Ser-AGA-2-2	FBgn0011983	X	off	off
lncRNA:CR44658	FBgn0265869	X	off	off
CG12479	FBgn0040871	X	off	off
CG12480	FBgn0030537	X	off	off
betaNACtes1	FBgn0030538	X	off	off
CG1368	FBgn0030539	X	off	off
CG11581	FBgn0030540	X	off	off
CG11584	FBgn0030541	X	off	off
asRNA:CR45995	FBgn0267657	X	off	off
CG32603	FBgn0052603	X	off	off
CG12481	FBgn0030542	X	off	off
CG11585	FBgn0030543	X	off	off
CG13403	FBgn0030544	X	off	off
yl	FBgn0004649	X	medium	off
mir-4917	FBgn0263530	X	off	off
CG11590	FBgn0030545	X	high	medium
Prp16	FBgn0026713	X	medium	medium
l(1)G0469	FBgn0040153	X	medium	medium
CG11674	FBgn0030551	X	off	off
mRpL38	FBgn0030552	X	medium	medium
CG42271	FBgn0259166	X	low	low
Fbxl4	FBgn0030555	X	low	low
CG1434	FBgn0030554	X	low	low
mRNA-cap	FBgn0030556	X	medium	medium
asRNA:CR46473	FBgn0287604	X	off	low
CG32599	FBgn0260482	X	off	low
mud	FBgn0002873	X	high	high
Tat	FBgn0030558	X	off	off
CG46317	FBgn0284233	X	off	off
CG13404	FBgn0030559	X	off	off
na	FBgn0002917	X	off	off
Muc12Ea	FBgn0052602	X	off	off
CG9400	FBgn0030562	X	off	off
lncRNA:CR44963	FBgn0266278	X	off	off
betaNACtes2	FBgn0030563	X	low	off
betaNACtes6	FBgn0052598	X	low	off
dpr8	FBgn0052600	X	low	off
betaNACtes3	FBgn0052601	X	low	off
betaNACtes4	FBgn0030566	X	low	off
CG9411	FBgn0030569	X	off	off
CG12540	FBgn0030570	X	off	off
lncRNA:CR44110	FBgn0264941	X	off	off
lncRNA:CR45521	FBgn0267077	X	off	off
CG14414	FBgn0030571	X	medium	medium
mRpS25	FBgn0030572	X	high	high
nmdyn-D6	FBgn0030573	X	low	off
sbm	FBgn0030574	X	low	off
NetA	FBgn0015773	X	off	off
CG5321	FBgn0030575	X	off	off
NetB	FBgn0015774	X	low	off
CG43088	FBgn0262534	X	high	off
hog	FBgn0266710	X	medium	off
CG15890	FBgn0030576	X	off	low
CG5334	FBgn0030577	X	off	off
CG5347	FBgn0030578	X	off	off
Ag5r2	FBgn0020508	X	off	off
Ag5r	FBgn0015010	X	off	off
lncRNA:CR45522	FBgn0267078	X	off	off
rut	FBgn0003301	X	low	low
CG14408	FBgn0030581	X	low	low
CG14411	FBgn0030582	X	high	medium
CG14410	FBgn0030583	X	off	off
Grx5	FBgn0030584	X	high	high
CG32590	FBgn0052590	X	low	low
Flo2	FBgn0264078	X	low	high
CG12539	FBgn0030586	X	off	off
CG9522	FBgn0030587	X	off	off
CG9521	FBgn0030588	X	off	off
CG9519	FBgn0030589	X	off	off
lncRNA:CR46391	FBgn0286869	X	off	off
CG46399	FBgn0286877	X	off	off
CG9518	FBgn0030590	X	off	low
CG45064	FBgn0266434	X	off	off
CG45065	FBgn0266435	X	off	off
CG9514	FBgn0030592	X	off	low
CG9512	FBgn0030593	X	off	off
fiz	FBgn0030594	X	off	off
CG14406	FBgn0030595	X	off	off
CG12398	FBgn0030596	X	off	off
Eo	FBgn0030597	X	off	off
CG9503	FBgn0030598	X	off	low
CG32591	FBgn0052591	X	off	off
pdgy	FBgn0027601	X	off	off
lncRNA:CR44831	FBgn0266094	X	off	low
CG9030	FBgn0030599	X	off	off
eag	FBgn0000535	X	low	off
hiw	FBgn0030600	X	low	off
be	FBgn0052594	X	off	high
CG5541	FBgn0030603	X	off	medium
ND-B18	FBgn0030605	X	high	high
opm	FBgn0264389	X	medium	medium
dob	FBgn0030607	X	off	low
Lsd-2	FBgn0030608	X	high	high
lncRNA:CR44662	FBgn0265873	X	off	off
lncRNA:CR44661	FBgn0265872	X	off	off
CG33177	FBgn0053177	X	off	off
asRNA:CR44960	FBgn0266275	X	off	off
CG33178	FBgn0053178	X	off	off
Cox17	FBgn0030610	X	high	medium
CG15027	FBgn0030611	X	high	high
Dbct	FBgn0030612	X	low	low
Rab3-GEF	FBgn0030613	X	medium	off
CG9072	FBgn0030614	X	off	off
Cyp4s3	FBgn0030615	X	off	off
drd	FBgn0260006	X	off	off
RpL37a	FBgn0030616	X	high	high
CG9095	FBgn0030617	X	off	off
CG43737	FBgn0263994	X	off	off
CG32588	FBgn0052588	X	off	off
CG5662	FBgn0030620	X	off	off
CG43075	FBgn0262485	X	low	low
CG43076	FBgn0262486	X	off	off
lncRNA:CR44430	FBgn0265612	X	off	off
CG9101	FBgn0030622	X	off	off
PPYR1	FBgn0030623	X	off	off
CG9106	FBgn0030624	X	off	off
lncRNA:CR44663	FBgn0265874	X	off	off
lncRNA:CR44664	FBgn0265875	X	off	off
CG5877	FBgn0030625	X	medium	low
asRNA:CR44429	FBgn0265611	X	off	off
gce	FBgn0261703	X	off	high
asRNA:CR44961	FBgn0266276	X	off	off
Top1	FBgn0004924	X	high	high
mir-4957	FBgn0263548	X	off	off
dah	FBgn0015926	X	low	low
CG9114	FBgn0030628	X	low	low
HDAC6	FBgn0026428	X	medium	medium
asRNA:CR44998	FBgn0266349	X	off	off
CG9123	FBgn0030629	X	low	low
CG12608	FBgn0030630	X	high	medium
Prp5	FBgn0030631	X	medium	medium
acj6	FBgn0000028	X	off	off
Pp1-13C	FBgn0003132	X	low	off
CG9164	FBgn0030634	X	off	medium
Cngl	FBgn0263257	X	off	off
Scamp	FBgn0040285	X	medium	high
Ahcy	FBgn0014455	X	high	high
CG11655	FBgn0030638	X	off	low
shtd	FBgn0004391	X	low	low
CG6294	FBgn0030640	X	off	off
CG6299	FBgn0030641	X	off	off
CG15642	FBgn0030642	X	off	off
CG15641	FBgn0030643	X	low	low
Grip128	FBgn0026433	X	low	low
Alg14	FBgn0030645	X	low	medium
mh	FBgn0267977	X	medium	medium
CG6324	FBgn0030647	X	high	off
CG6340	FBgn0030648	X	high	high
Gmap	FBgn0027287	X	off	high
lncRNA:CR44888	FBgn0266182	X	off	off
mir-283	FBgn0262426	X	off	off
mir-304	FBgn0262409	X	off	off
mir-12	FBgn0262395	X	off	off
Ac13E	FBgn0022710	X	low	low
lncRNA:CR44353	FBgn0265453	X	off	off
lncRNA:CR44354	FBgn0265454	X	off	off
CG42300	FBgn0259196	X	medium	off
CG7860	FBgn0030653	X	off	medium
CG15643	FBgn0030654	X	off	off
CG9213	FBgn0030655	X	low	low
CG42299	FBgn0259195	X	low	off
cerv	FBgn0030657	X	low	low
CG7872	FBgn0030658	X	low	medium
CG9215	FBgn0030659	X	low	low
CG8097	FBgn0030660	X	high	off
Chsy	FBgn0030662	X	off	medium
Alp11	FBgn0030661	X	off	off
sog	FBgn0003463	X	off	off
lncRNA:CR44423	FBgn0265596	X	off	off
lncRNA:CR44893	FBgn0266198	X	off	off
CG8117	FBgn0030663	X	off	off
asRNA:CR43299	FBgn0262991	X	off	off
CG8119	FBgn0030664	X	low	off
CG15646	FBgn0030665	X	off	off
CG12708	FBgn0030666	X	off	off
CG15599	FBgn0030667	X	high	off
lncRNA:CR43132	FBgn0262606	X	high	off
lncRNA:CR45523	FBgn0267079	X	low	off
lncRNA:CR45524	FBgn0267080	X	off	off
lncRNA:CR45526	FBgn0267082	X	off	off
CG8128	FBgn0030668	X	low	low
CG9240	FBgn0030669	X	medium	high
Pis	FBgn0030670	X	low	medium
CG8134	FBgn0030671	X	low	low
CG9281	FBgn0030672	X	high	high
CG15601	FBgn0030673	X	low	low
HUWE1	FBgn0030674	X	high	high
CG8191	FBgn0030675	X	low	low
CG12379	FBgn0030676	X	medium	medium
MagR	FBgn0026666	X	medium	medium
Arp6	FBgn0011741	X	medium	medium
CG11679	FBgn0030678	X	low	medium
CG8206	FBgn0030679	X	low	medium
CG8944	FBgn0030680	X	medium	low
CCT6	FBgn0027329	X	high	high
Mvd	FBgn0030683	X	low	low
Graf	FBgn0030685	X	medium	high
CG8260	FBgn0030684	X	off	off
mRpL3	FBgn0030686	X	medium	high
Polr3A	FBgn0030687	X	low	low
CG8952	FBgn0030688	X	off	off
CG33172	FBgn0053172	X	low	low
CG43672	FBgn0263747	X	off	off
CG43673	FBgn0263748	X	off	off
Efhc1.1	FBgn0030691	X	off	off
Paf-AHalpha	FBgn0025809	X	high	high
mRpS30	FBgn0030692	X	medium	medium
Rhp	FBgn0026374	X	low	off
sordd1	FBgn0030693	X	medium	high
sordd2	FBgn0052581	X	low	medium
CG15602	FBgn0030694	X	medium	low
PGRP-LE	FBgn0030695	X	medium	medium
sd	FBgn0003345	X	high	high
lncRNA:CR44384	FBgn0265534	X	off	low
CG8509	FBgn0030696	X	off	off
Chc	FBgn0000319	X	high	high
lncRNA:CR32582	FBgn0052582	X	off	off
CG8565	FBgn0030697	X	off	off
ArgRS	FBgn0027093	X	medium	medium
CG8578	FBgn0030699	X	low	low
sun	FBgn0014391	X	high	high
UBL3	FBgn0026076	X	medium	high
CG15914	FBgn0030700	X	low	low
Myb	FBgn0002914	X	off	off
CG46440	FBgn0287210	X	off	off
AlkB	FBgn0065035	X	low	medium
Gbeta13F	FBgn0001105	X	high	high
Gapdh2	FBgn0001092	X	high	high
CG16952	FBgn0030701	X	medium	medium
tay	FBgn0260938	X	high	high
MSBP	FBgn0030703	X	medium	high
CG15916	FBgn0030704	X	low	low
shi	FBgn0003392	X	high	high
CycD	FBgn0010315	X	medium	medium
Lrp4	FBgn0030706	X	off	off
CG8916	FBgn0030707	X	off	off
Lcch3	FBgn0010240	X	off	off
asRNA:CR45000	FBgn0266351	X	off	low
Ranbp16	FBgn0053180	X	medium	medium
Stim	FBgn0045073	X	medium	high
CG8924	FBgn0030710	X	medium	medium
Rrp47	FBgn0030711	X	high	high
mmd	FBgn0259110	X	off	off
mir-927	FBgn0262210	X	off	off
lncRNA:CR45527	FBgn0267083	X	off	off
Or13a	FBgn0030715	X	off	off
CG42766	FBgn0261834	X	off	off
CG9170	FBgn0030716	X	low	off
Slc25A46a	FBgn0030717	X	low	low
ND-20	FBgn0030718	X	high	high
eIF5	FBgn0030719	X	low	low
CG46312	FBgn0284228	X	off	off
exd	FBgn0000611	X	high	high
CG8939	FBgn0030720	X	high	medium
vap	FBgn0003969	X	medium	medium
CG12698	FBgn0030721	X	off	off
Muc14A	FBgn0052580	X	low	off
CG12395	FBgn0030722	X	off	off
dpr18	FBgn0030723	X	low	off
Nipsnap	FBgn0030724	X	medium	high
Tob	FBgn0028397	X	low	medium
mir-4958	FBgn0263516	X	off	off
CG8958	FBgn0030725	X	off	off
CG42353	FBgn0259699	X	off	off
CG42354	FBgn0259700	X	off	off
disco-r	FBgn0285879	X	off	off
lncRNA:CR46211	FBgn0267930	X	off	off
mir-985	FBgn0262283	X	off	off
disco	FBgn0000459	X	off	off
snRNA:U5:14B	FBgn0003933	X	off	off
snRNA:U2:14B	FBgn0003920	X	off	off
CG12507	FBgn0030729	X	off	off
kat80	FBgn0040207	X	medium	medium
Mfe2	FBgn0030731	X	low	medium
Prosalpha4	FBgn0004066	X	high	high
eas	FBgn0000536	X	medium	low
CG32576	FBgn0052576	X	low	medium
UQCR-14	FBgn0030733	X	high	high
caz	FBgn0285954	X	high	high
ERp44	FBgn0030734	X	medium	medium
CG3632	FBgn0030735	X	low	low
CG3679	FBgn0027521	X	medium	off
Had1	FBgn0286508	X	off	off
asRNA:CR45485	FBgn0267041	X	low	off
CG9915	FBgn0030738	X	medium	medium
SWIP	FBgn0030739	X	low	low
Cyp1	FBgn0004432	X	high	high
CG9917	FBgn0030740	X	medium	high
CG32579	FBgn0052579	X	low	low
CalpC	FBgn0260450	X	off	low
CG9919	FBgn0030742	X	off	off
CG9921	FBgn0030743	X	medium	medium
Dsp1	FBgn0278608	X	high	high
sl	FBgn0003416	X	medium	medium
U2af50	FBgn0005411	X	high	high
PIG-Q	FBgn0086448	X	low	low
nonA	FBgn0004227	X	high	high
Fur2	FBgn0004598	X	low	medium
CG9992	FBgn0030744	X	high	medium
CG4239	FBgn0030745	X	low	low
TH1	FBgn0010416	X	medium	medium
mei-41	FBgn0004367	X	medium	low
CG9981	FBgn0030746	X	off	off
CG4301	FBgn0030747	X	off	off
Traf-like	FBgn0030748	X	off	off
AnxB11	FBgn0030749	X	low	high
hang	FBgn0026575	X	high	high
CDC50	FBgn0030752	X	low	medium
rngo	FBgn0030753	X	medium	medium
eIF2alpha	FBgn0261609	X	high	high
CG34015	FBgn0054015	X	medium	medium
eIF4H1	FBgn0262734	X	high	high
para	FBgn0285944	X	low	off
Cnx14D	FBgn0264077	X	off	off
CG9903	FBgn0030756	X	off	off
CG9902	FBgn0030757	X	low	off
Arp2	FBgn0011742	X	medium	high
Pp2B-14D	FBgn0011826	X	high	high
CanA-14F	FBgn0267912	X	low	medium
CG13014	FBgn0030759	X	low	medium
SMC3	FBgn0015615	X	medium	low
Ubc7	FBgn0267384	X	medium	medium
CG9784	FBgn0030761	X	low	low
Nup153	FBgn0061200	X	high	high
mir-4965	FBgn0263538	X	off	off
mbt	FBgn0025743	X	high	high
sisRNA:2	FBgn0286040	X	off	off
CG9782	FBgn0030763	X	off	off
Rok	FBgn0026181	X	high	high
CG9777	FBgn0030764	X	off	off
asRNA:CR45001	FBgn0266352	X	off	off
sbRNA:1	FBgn0286878	X	off	off
RpS19a	FBgn0010412	X	high	high
SNRPG	FBgn0261791	X	high	high
mthl1	FBgn0030766	X	medium	high
lncRNA:CR46147	FBgn0267826	X	off	off
CG42512	FBgn0260238	X	off	off
CG32573	FBgn0052573	X	off	off
Nemp	FBgn0030768	X	low	low
r	FBgn0003189	X	low	high
CG15865	FBgn0015336	X	off	off
CG13012	FBgn0030769	X	off	off
CG13010	FBgn0030770	X	off	off
sing	FBgn0261245	X	off	off
Axs	FBgn0000152	X	low	low
Septin4	FBgn0259923	X	high	off
CG4678	FBgn0030778	X	off	off
CG9676	FBgn0030773	X	off	off
sphe	FBgn0030774	X	off	off
CG9673	FBgn0030775	X	off	off
CG4653	FBgn0030776	X	off	off
CG9672	FBgn0030777	X	off	off
CG13008	FBgn0030780	X	off	off
CG34325	FBgn0085354	X	off	low
CG32572	FBgn0052572	X	off	off
goe	FBgn0027528	X	low	medium
TwdlX	FBgn0052571	X	off	off
TwdlY	FBgn0052570	X	off	off
TwdlZ	FBgn0052569	X	off	off
CG32568	FBgn0052568	X	off	off
Twdlalpha	FBgn0052574	X	off	off
if	FBgn0001250	X	off	low
mRpL22	FBgn0030786	X	high	high
CG9609	FBgn0030787	X	medium	medium
Sap30	FBgn0030788	X	medium	medium
Rrp45	FBgn0030789	X	low	low
CG4768	FBgn0030790	X	high	high
CG9132	FBgn0030791	X	medium	high
CG4789	FBgn0030792	X	medium	high
Rai1	FBgn0030793	X	medium	low
CG13005	FBgn0030794	X	low	off
asRNA:CR44053	FBgn0264862	X	off	off
ppk28	FBgn0030795	X	off	low
CG4829	FBgn0030796	X	off	low
lncRNA:CR44129	FBgn0264960	X	off	off
CG46306	FBgn0284222	X	off	off
CG13004	FBgn0030797	X	off	off
RSG7	FBgn0024941	X	off	off
CG13003	FBgn0030798	X	off	off
CG4872	FBgn0030799	X	off	off
Nprl2	FBgn0030800	X	low	low
Polr3I	FBgn0030801	X	low	low
DENR	FBgn0030802	X	high	high
CG4880	FBgn0030803	X	low	low
lncRNA:CR43768	FBgn0264268	X	off	off
CG13002	FBgn0030804	X	off	off
CG33252	FBgn0053252	X	off	off
lncRNA:CR44754	FBgn0265967	X	off	off
CG4928	FBgn0027556	X	off	high
wus	FBgn0030805	X	off	low
CG13001	FBgn0030806	X	low	medium
[truncated: 15,560 more rows]
