# Supplementary material for: Cell-type- and chromosome-specific chromatin landscapes and DNA replication programs of Drosophila testis tumor stem cell–like cells
Source: Genome Res. 2026 Jan;36(1):83–101. doi: 10.1101/gr.280809.125 (PMC12758400; doi:10.1101/gr.280809.125)
Supplement: Supplement 2 [file Supplemental_Table_S2.xlsx]

## Sheet: Legend
Bayesian DEG Testing of GSC-like vs CySC-like Gene Enrichment
	symbol	FlyBase current symbol of every gene present in the dataset (as of release r6.47).
	flybase	FBgn# ID of the gene.
	N_Cells	Num cells containing UMI in the batch nanos>Upd Rep1. Abundance in number of cells has been cut at minimum 50 cells for analysis of the gene.
	GSC_vs_CySC_L2FC_coef
	S_value	FDR-controlling Bayesian likelihood ratio test value

## Sheet: Sheet1
		Count (Nos-Upd Rep1) Gene != 0 At Least 50 for analysis		FDR-controlling Bayesian likelihood ratio test value
symbol	flybase	N_Cells	GSC_vs_CySC_L2FC_coef	S_value
H3-GFP		2383	-0.9	2.9e-24
lncRNA:CR40469	FBgn0058469	1289	-1.4	1.8e-08
CG17636	FBgn0025837	128	0.77	0.019
RhoGAP1A	FBgn0025836	2284	-1.07	1.8e-29
mir-4915	FBgn0263567	1
tyn	FBgn0284435	2321	-0.51	0.00027
lncRNA:CR45473	FBgn0267029	632	-3.77	1.9e-73
CG17707	FBgn0025835	51	-0.25	0.058
lncRNA:CR43863	FBgn0264445	103	0.75	0.026
CG3038	FBgn0040373	912	-1.74	4.8e-29
G9a	FBgn0040372	5554	0.17	7.7e-05
CG42376	FBgn0259722	3226	-1.1	3e-38
cin	FBgn0000316	1471	-0.83	7.3e-14
CG13377	FBgn0261446	295	-1.27	3e-05
asRNA:CR43906	FBgn0264507	367	-1.16	1e-05
CG13376	FBgn0029518	24
ewg	FBgn0005427	4056	-1.9	2.7e-150
CG3777	FBgn0024989	961	0.51	0.037
mir-980	FBgn0262266	0
CG13375	FBgn0040370	323	4.7	5.1e-06
CG12470	FBgn0040371	2308	0.07	0.049
Or1a	FBgn0029521	4
CG32816	FBgn0052816	5341	5.42	1.1e-22
CG43181	FBgn0262810	3
CG43182	FBgn0262811	8
y	FBgn0004034	146	0.48	0.044
lncRNA:yar	FBgn0266568	121	-2.66	2.9e-06
ac	FBgn0000022	25
lncRNA:CR44751	FBgn0265964	182	0.08	0.08
lncRNA:CR44752	FBgn0265965	100	2.13	0.01
lncRNA:CR44753	FBgn0265966	70	4.25	6.3e-05
sc	FBgn0004170	24
l(1)sc	FBgn0002561	21
Pgcl	FBgn0011822	37
ase	FBgn0000137	48
Cyp4g1	FBgn0010019	84	5.18	7.5e-06
ebo	FBgn0266572	1253	-0.52	1.5e-06
CG13373	FBgn0029522	1925	0.92	1.9e-14
CG32817	FBgn0052817	1002	0.05	0.064
CG3176	FBgn0029524	1927	-0.47	4.2e-05
CG18273	FBgn0029525	1478	0.76	1.3e-10
CG3156	FBgn0023536	809	0.77	1.7e-05
asRNA:CR45797	FBgn0267447	142	-0.4	0.039
CG17896	FBgn0023537	2958	-3.45	0
CG17778	FBgn0023534	1073	-4.48	2.6e-122
svr	FBgn0004648	2713	-1.91	1.7e-57
asRNA:CR44891	FBgn0266196	46
asRNA:CR44892	FBgn0266197	32
elav	FBgn0260400	1414	-0.84	5.7e-09
arg	FBgn0023535	202	-1.9	6.8e-05
lncRNA:enrr	FBgn0286870	0
CG4293	FBgn0024983	1582	-0.6	6.2e-08
Appl	FBgn0000108	1141	3.97	3.6e-23
mir-4960	FBgn0263534	0
vnd	FBgn0261930	43
spdi	FBgn0025633	6303	0.78	6e-22
lncRNA:CR45474	FBgn0267030	630	2.23	6.9e-12
CG13365	FBgn0029529	5176	-0.86	9.3e-47
Vsp37A	FBgn0016038	2618	-0.76	4.7e-14
CG13369	FBgn0025640	2677	-1.18	3.2e-40
CG13364	FBgn0026879	11188	-0.2	4.8e-12
lncRNA:CR45475	FBgn0267031	79	0.13	0.074
Hinfp	FBgn0025635	1454	0.8	4e-09
RpL36	FBgn0002579	22738	-0.13	1.2e-18
Mybbp1A	FBgn0001341	2087	1.25	1.6e-27
Dredd	FBgn0020381	1422	-1.15	6.5e-19
mir-9372	FBgn0283549	0
su(sable)	FBgn0003575	2804	-0.94	3.9e-24
CG13367	FBgn0025634	2127	-0.6	2e-07
Roc1a	FBgn0025638	9102	-0.04	0.018
Hmt4-20	FBgn0025639	4298	0.23	3.2e-05
SkpA	FBgn0025637	6926	-0.92	5.1e-90
sdk	FBgn0021764	4986	0.76	1e-21
CG13362	FBgn0029531	18
CG5254	FBgn0040383	1732	-5.59	5.3e-298
CG13361	FBgn0029532	8
CG5273	FBgn0040382	750	-1.05	5.6e-10
lncRNA:CR44965	FBgn0266280	4
RpL22	FBgn0015288	7236	-3.04	0
lncRNA:CR42491	FBgn0259993	1153	-0.45	3.6e-05
snoRNA:Psi18S-531	FBgn0083027	109	-1.47	7e-07
snoRNA:Psi28S-2179	FBgn0086666	9
lncRNA:CR44966	FBgn0266281	41
fz3	FBgn0027343	705	-3.12	2.8e-25
tw	FBgn0086368	29
CG13360	FBgn0025620	175	-1.74	0.00048
lncRNA:CR44469	FBgn0265662	0
CG16989	FBgn0025621	1579	-2.27	8.1e-73
Rbf	FBgn0015799	1931	0.38	3.1e-05
CG13359	FBgn0025616	519	-0.12	0.058
CG13358	FBgn0026874	35
Sec22	FBgn0260855	1849	-0.69	6.2e-12
CG43867	FBgn0264449	3339	1.11	6.6e-16
CG14635	FBgn0029535	80	-1.76	0.00072
CG3713	FBgn0040343	161	-1.37	5.5e-05
CG14634	FBgn0040892	222	-2.95	1.8e-13
CG11664	FBgn0040341	23
CG11663	FBgn0029539	1053	0.25	0.021
Lztr1	FBgn0040344	986	-0.47	6e-05
MED22	FBgn0040339	4182	0.34	2.9e-08
CG3708	FBgn0040345	572	-0.01	0.088
CG3706	FBgn0040342	8
CG32815	FBgn0052815	248	0.01	0.09
TRAM	FBgn0040340	2725	-1.98	3.8e-122
CG3704	FBgn0040346	2318	-0.23	0.00061
mus81	FBgn0040347	544	0.47	0.0015
CG3703	FBgn0040348	200	-3.08	2.7e-16
CG3699	FBgn0040349	53	-0.78	0.028
CG3690	FBgn0040350	52	-1.82	0.0051
lncRNA:CR45476	FBgn0267032	2
CG18823	FBgn0042146	364	1.83	0.00011
TfIIA-S-2	FBgn0040338	8188	3.24	0
CG14631	FBgn0029552	420	0.08	0.074
su(w[a])	FBgn0003638	2117	-0.36	4.5e-05
CG11638	FBgn0040351	1663	3.98	7.8e-40
CG32814	FBgn0052814	1017	4.86	1.3e-52
CG3021	FBgn0040337	2135	-0.14	0.01
Cdc45	FBgn0026143	787	-0.33	0.0014
Rpp21	FBgn0053082	367	0.13	0.047
CG14630	FBgn0014903	13
CG42259	FBgn0266569	781	-1.51	3.4e-16
lncRNA:CR44779	FBgn0266005	765	0.79	0.011
CG14629	FBgn0040398	339	-3.83	1.1e-26
CG3655	FBgn0040397	4211	-0.41	8.3e-10
CG14628	FBgn0040365	1143	1.4	2.4e-12
eIF4E7	FBgn0040368	1295	0.36	0.0077
CG11378	FBgn0040364	286	-0.5	0.0075
CG11384	FBgn0040363	13
CG11379	FBgn0040362	835	-0.12	0.048
CG14627	FBgn0040361	22
CG14626	FBgn0040360	13
CG11380	FBgn0040359	13
CG14625	FBgn0040358	9
CG11381	FBgn0029568	4
CG14624	FBgn0040357	2
CG11382	FBgn0040367	130	2.7	0.0011
CG11398	FBgn0040366	596	-0.24	0.011
CG3638	FBgn0261444	4128	-2	3.9e-182
CG11403	FBgn0026876	1828	0.43	1e-05
Atf3	FBgn0028550	1627	-2.29	4.2e-72
CG32812	FBgn0025642	337	0.6	0.0084
DAAM	FBgn0025641	2569	-2.07	3.8e-92
CG32811	FBgn0052811	386	0.63	0.01
lncRNA:CR46248	FBgn0267970	6
fs(1)N	FBgn0004650	343	3.04	5.4e-10
CG11409	FBgn0024366	537	4.78	7.7e-10
Naa30A	FBgn0024362	3836	-0.96	9.2e-41
MTPAP	FBgn0024360	1096	0.71	6.2e-06
Tsp2A	FBgn0024361	77	-0.87	0.0043
CG12773	FBgn0024365	521	-1.42	4.8e-18
CG11417	FBgn0024364	2855	0.59	8.9e-12
png	FBgn0000826	245	0.22	0.038
CG14770	FBgn0029573	39
ssx	FBgn0024987	3853	0.43	3.7e-09
mir-4961	FBgn0263552	0
AMPKalpha	FBgn0023169	2151	-1.31	1.3e-36
CG3719	FBgn0024986	2222	-0.37	9e-06
CG32813	FBgn0052813	2597	1.58	1.8e-37
Rilpl	FBgn0024985	2332	-1.34	6.6e-48
futsch	FBgn0259108	1006	-0.13	0.027
Gr2a	FBgn0265139	0
CG14785	FBgn0027795	746	-0.61	0.00065
Lrpprc2	FBgn0027794	947	-0.63	3.5e-06
CG14787	FBgn0027793	199	1.86	3e-06
Ns3	FBgn0266284	2131	0.35	6.2e-05
O-fut2	FBgn0027791	1400	-1.6	9.3e-39
CG14777	FBgn0026872	743	-2.88	3.6e-57
CG14778	FBgn0029580	60	-2.17	0.00015
CG32808	FBgn0052808	84	-0.97	0.0017
pck	FBgn0013720	2797	-2.95	1.5e-266
CG14780	FBgn0025383	31
Rab27	FBgn0025382	1031	-0.19	0.013
mei-38	FBgn0260986	705	0.58	0.00011
rush	FBgn0025381	1384	-1.96	1.4e-49
sta	FBgn0003517	21738	-0.4	2e-119
snoRNA:M	FBgn0044508	0
snoRNA:Me28S-G980	FBgn0086042	0
inc	FBgn0025394	4255	-0.45	1.5e-12
Nmdar2	FBgn0053513	331	6.44	1e-07
CG14795	FBgn0025393	183	2.68	5.9e-06
Mur2B	FBgn0025390	2723	0.68	0.0017
sncRNA:400	FBgn0065095	0
br	FBgn0283451	4208	-4.11	0
dor	FBgn0000482	735	-0.46	0.00028
CG3740	FBgn0023530	1463	0.06	0.055
hfw	FBgn0001189	974	-1.48	5.7e-21
CG32809	FBgn0023531	764	0.45	0.0018
CG14797	FBgn0029587	11
b6	FBgn0024897	7
a6	FBgn0023130	759	0.32	0.0052
CG3795	FBgn0025378	362	0.8	0.004
Scgdelta	FBgn0025391	16
prage	FBgn0283741	6476	-5.81	0
Adar	FBgn0026086	2875	-0.14	0.0037
mir-981	FBgn0262178	0
CG32806	FBgn0052806	697	-0.17	0.045
CG14810	FBgn0029589	1434	3.43	2e-27
CG14811	FBgn0029590	518	2.27	1.8e-08
Lamtor5	FBgn0026090	4731	-1.66	1.1e-158
deltaCOP	FBgn0028969	4071	-0.36	2.2e-08
Gcna	FBgn0023515	1570	0.56	5.3e-06
MED18	FBgn0026873	3336	-0.18	0.0011
Pex5	FBgn0023516	1295	0.4	0.0004
CG14803	FBgn0023513	782	0.24	0.0093
Pgam5	FBgn0023517	3166	-0.46	6.3e-10
Vps26	FBgn0014411	2688	-0.29	4e-05
CG14817	FBgn0026089	4846	-0.47	2.4e-15
CG14805	FBgn0023514	2687	0.32	4.1e-05
CG14818	FBgn0026088	3982	-1.5	2.9e-102
Coa8	FBgn0029594	3074	0.12	0.0085
trr	FBgn0023518	1585	-0.24	0.0021
mRpL16	FBgn0023519	4742	0.18	0.00019
arm	FBgn0000117	7554	-1.07	3.8e-134
Ldaf1	FBgn0052803	2487	-0.93	5.7e-23
asRNA:CR45929	FBgn0267591	27
asRNA:CR43864	FBgn0264446	218	3.29	1.8e-06
CG32801	FBgn0052801	71	-1.08	0.0041
Edem1	FBgn0023511	1380	-0.77	1.1e-09
mip130	FBgn0023509	1434	0.21	0.0044
Rbcn-3B	FBgn0023510	1690	-1.42	5.8e-40
eIF2Bepsilon	FBgn0023512	2106	0.16	0.0051
Ocrl	FBgn0023508	1726	-0.38	4e-05
CG11596	FBgn0023522	2342	0.46	2.3e-06
CG3857	FBgn0023520	400	-1.39	1.2e-09
CG3587	FBgn0023521	1511	0.1	0.032
Hr4	FBgn0264562	2200	2.66	1.6e-26
PIG-K	FBgn0023545	1546	-1.08	1.6e-19
lncRNA:CR45478	FBgn0267034	12
mir-2496	FBgn0262297	2
east	FBgn0261954	4914	0.61	4.6e-26
Actn	FBgn0000667	2945	-1.44	3.8e-64
mir-4954	FBgn0263542	2
usp	FBgn0003964	1598	-1.4	7.6e-35
CG4313	FBgn0025632	282	-0.82	0.0009
CG4325	FBgn0026878	1311	-6.32	2.3e-224
moody	FBgn0025631	2104	-5.88	0
Sik2	FBgn0025625	79	-0.78	0.011
asRNA:CR44896	FBgn0266201	0
CG4281	FBgn0025626	2736	0.4	7.6e-07
CG14054	FBgn0029596	416	-0.45	0.019
asRNA:CR44381	FBgn0265531	351	0.11	0.058
CG4199	FBgn0025628	1794	-4.15	1.2e-240
CG4194	FBgn0025627	46
asRNA:CR44382	FBgn0265532	70	-0.09	0.073
Rtca	FBgn0025630	1819	0.58	3.9e-06
CG4045	FBgn0025629	2582	-0.16	0.003
CG4025	FBgn0025624	829	-2.23	6.7e-42
CG16903	FBgn0040394	2756	0.17	0.0023
Unc-76	FBgn0040395	2652	-1.05	3e-25
csw	FBgn0000382	4064	-4.5	0
snoRNA:Me18S-C1024	FBgn0086043	1
ph-d	FBgn0004860	2355	0.14	0.0093
ph-p	FBgn0004861	2926	-0.35	2.1e-05
D2hgdh	FBgn0023507	1081	-4.7	4.7e-127
Pgd	FBgn0004654	1025	-2.44	1.2e-51
bcn92	FBgn0013432	3725	-0.39	1.2e-08
wapl	FBgn0004655	2954	0.3	4.2e-05
Cyp4d1	FBgn0005670	9
CG3630	FBgn0023540	770	0.45	0.00062
mir-3641	FBgn0263630	0
ND-B14.5A	FBgn0025839	6635	-1.08	5.4e-111
Cyp4d14	FBgn0023541	83	-0.05	0.081
asRNA:CR45479	FBgn0267035	268	-1.02	1.7e-05
asRNA:CR44690	FBgn0265901	381	-0.89	3.8e-06
Cyp4d2	FBgn0011576	235	-0.83	0.00074
Cyp4ae1	FBgn0015036	43
pn	FBgn0003116	794	0.9	3.2e-06
Nmd3	FBgn0023542	1488	-0.43	1.9e-05
CG17776	FBgn0040899	8199	0.06	0.0057
CG17777	FBgn0040900	203	-1.02	0.0075
CG3457	FBgn0024984	50	-1.38	0.00094
Mct1	FBgn0023549	175	-7.02	3.6e-24
CG14053	FBgn0029603	461	-0.16	0.057
asRNA:CR43637	FBgn0263628	448	0.25	0.037
FarO	FBgn0023550	6
SmydA-8	FBgn0053548	36
Vinc	FBgn0004397	1635	-3.07	5.7e-128
CG14052	FBgn0029606	37
pcx	FBgn0003048	2252	-1.02	3.6e-31
kz	FBgn0001330	2029	0.05	0.047
fs(1)K10	FBgn0000810	1805	0.29	0.00054
Or2a	FBgn0023523	97	1.38	0.003
crn	FBgn0000377	1809	0.13	0.013
CG3191	FBgn0023525	282	-1.62	6.4e-07
CG3091	FBgn0029608	333	-5.17	5.4e-36
CG3078	FBgn0023524	15
temp	FBgn0027296	954	-0.32	0.0022
CG3071	FBgn0023527	2021	0.46	3.5e-06
CG2924	FBgn0023528	4797	-1.23	3.2e-89
lncRNA:CR45480	FBgn0267036	68	-0.58	0.016
Grp170	FBgn0023529	4157	-0.15	0.0008
Vml	FBgn0085362	2
CG2865	FBgn0023526	8963	1.85	3.2e-225
Raf	FBgn0003079	1704	-0.25	0.0037
lncRNA:CR34052	FBgn0054052	32
CG14050	FBgn0040392	81	-2.13	2.3e-05
CG2854	FBgn0040391	530	0.14	0.056
lncRNA:CR33218	FBgn0053218	1084	0.35	0.0094
Ilp6	FBgn0044047	2541	-5.71	0
mRpL14	FBgn0040389	3848	-0.47	5.5e-12
CG2841	FBgn0003159	1311	-0.83	3.9e-06
PsGEF	FBgn0264598	159	1	0.012
CG12496	FBgn0040385	1
CG32797	FBgn0052797	71	0.09	0.078
gt	FBgn0001150	74	-1.58	0.00066
tko	FBgn0003714	5298	-0.59	3.8e-29
boi	FBgn0040388	780	-0.95	1.6e-07
z	FBgn0004050	1753	-1.32	3.5e-29
trol	FBgn0284408	7174	-3.6	0
mir-4955	FBgn0263531	20
Pdfr	FBgn0260753	769	2.79	4.3e-08
Vha36-3	FBgn0040377	105	2.17	0.0042
AANATL7	FBgn0040376	95	0.3	0.052
CG13760	FBgn0040375	821	0.98	4.4e-07
wds	FBgn0040066	6015	0.57	1e-23
egh	FBgn0001404	4594	-0.52	1.8e-16
Klp3A	FBgn0011606	2467	0.72	3.8e-12
Zw10	FBgn0004643	2301	0.19	0.0024
Smyd3	FBgn0011566	1063	0.02	0.081
eIF3g1	FBgn0029629	8368	-0.52	3.8e-36
Tsp3A	FBgn0040334	535	-0.89	1.6e-06
Seipin	FBgn0040336	436	-0.49	0.0015
brv3	FBgn0040333	338	0.16	0.063
Pi4KIIIalpha	FBgn0267350	1154	-1.36	6.9e-24
sgg	FBgn0003371	8637	-0.18	0.0002
lncRNA:CR45197	FBgn0266707	0
HLH3B	FBgn0011276	1
CG2652	FBgn0025838	451	0.34	0.029
lncRNA:CR44470	FBgn0265663	19
per	FBgn0003068	359	-0.17	0.041
dyw	FBgn0000092	67	-2.01	0.00059
Spg7	FBgn0024992	1719	0.2	0.0061
CG2662	FBgn0024993	1165	0.83	2e-07
Ugalt	FBgn0024994	604	-0.84	1.7e-07
eIF2Bbeta	FBgn0024996	1937	-0.04	0.054
CG2680	FBgn0024995	218	0.47	0.03
CG2681	FBgn0024997	88	0.2	0.059
CG2685	FBgn0024998	2123	0.75	2.6e-12
CG2694	FBgn0024991	2098	1.5	1e-26
CG2701	FBgn0024973	2409	0.95	3.2e-17
fs(1)Yb	FBgn0000928	1750	-1.83	6.5e-65
fs(1)Ya	FBgn0000927	48
vilya	FBgn0283545	1505	2.07	1.5e-25
dwg	FBgn0000520	1552	0.59	5.9e-07
ttm50	FBgn0250874	2939	0.37	2.6e-06
CG2712	FBgn0024975	452	-0.15	0.04
crm	FBgn0000376	1580	1.05	2.7e-14
Syx4	FBgn0024980	2159	3.39	5.1e-37
kirre	FBgn0028369	6246	-1.12	1.9e-17
lncRNA:CR43494	FBgn0263505	18
CG32795	FBgn0040384	1328	-0.23	0.0071
w	FBgn0003996	2922	-2.45	0
CG12498	FBgn0040356	301	0.17	0.056
CG14416	FBgn0040352	57	-3.74	1.9e-08
CG14417	FBgn0040353	8
CG14418	FBgn0040354	13
CG14419	FBgn0029639	25
CG3526	FBgn0040355	372	1.19	0.00022
CG3588	FBgn0025643	23
CG14424	FBgn0025644	2
CG32793	FBgn0052793	15
CG3592	FBgn0029642	54	0.53	0.039
CG3598	FBgn0025645	22
CG14420	FBgn0029643	16
CG14421	FBgn0029644	21
CG14422	FBgn0029645	2
CG14423	FBgn0029646	16
CG17959	FBgn0029647	15
CG3603	FBgn0029648	969	-3.15	2.9e-82
rst	FBgn0003285	1272	-3.11	1.2e-95
CG4116	FBgn0029649	25
N	FBgn0004647	5699	-1.88	6.4e-295
CG18508	FBgn0028746	2610	0.46	3.8e-06
Fcp3C	FBgn0000644	81	-1.39	0.00042
CG3939	FBgn0040396	4358	-0.13	0.0033
dnc	FBgn0000479	10009	1	7.3e-67
CG14265	FBgn0040393	4
ng2	FBgn0010294	0
ng3	FBgn0010295	2
ng1	FBgn0002933	1
ng4	FBgn0010296	0
Pig1	FBgn0003086	6
Sgs4	FBgn0003374	21
lncRNA:CR44886	FBgn0266180	1375	0.57	0.034
CG10793	FBgn0029656	253	-0.33	0.035
lncRNA:CR46243	FBgn0267963	0
lncRNA:CR44999	FBgn0266350	2672	-0.41	0.046
Myc	FBgn0262656	10534	0.88	2.2e-199
CG12535	FBgn0029657	1798	-0.61	0.00015
tRNA:Gln-TTG-2-1	FBgn0052493	1
CG14269	FBgn0029658	854	-0.06	0.069
CG16782	FBgn0029659	1843	-0.29	0.0074
CG10801	FBgn0029660	274	-0.5	0.015
CG16781	FBgn0029661	620	0.53	0.006
CG12206	FBgn0029662	747	-3.18	7.4e-22
CG10804	FBgn0029663	86	-0.39	0.029
CG10802	FBgn0029664	1759	-0.15	0.0094
CG14270	FBgn0029665	2805	0.49	1.7e-07
CG10803	FBgn0029666	4922	0.58	1.5e-22
Gas8	FBgn0029667	509	1.95	5.4e-05
DIP-alpha	FBgn0052791	2770	0.39	0.002
CG13021	FBgn0029669	484	-0.35	0.022
lncRNA:CR34335	FBgn0267910	22902	-1.86	0
ppk8	FBgn0052792	258	-0.2	0.068
CG2875	FBgn0029672	1521	0.47	1.8e-06
AstA-R1	FBgn0266429	66	0.21	0.065
Ilp7	FBgn0044046	8
Parg	FBgn0023216	692	-0.43	0.001
Mnt	FBgn0023215	3810	-0.76	3.8e-16
lncRNA:CR45102	FBgn0266549	1445	-0.25	0.0011
Rala	FBgn0015286	7669	-0.86	1.6e-73
Tlk	FBgn0283657	10445	0.41	1.4e-16
mir-4962	FBgn0263532	34
HIP-R	FBgn0029676	4013	0.83	1.8e-27
lncRNA:CR44117	FBgn0264948	0
Crg-1	FBgn0021738	23
HIP	FBgn0260484	2499	0.98	1e-19
lncRNA:CR44118	FBgn0264949	0
fd3F	FBgn0264954	7
ec	FBgn0000542	986	-5	7.5e-60
tRNA:Gln-CTG-2-1	FBgn0052785	0
tRNA:Pro-CGG-3-1	FBgn0025118	2
CG2901	FBgn0029679	165	-0.56	0.018
lncRNA:roX1	FBgn0019661	8930	-6.01	0
yin	FBgn0265575	195	2.28	0.00099
CG2930	FBgn0028491	390	-0.96	0.0034
VhaAC39-1	FBgn0285910	3379	-1.54	9.8e-99
CG15239	FBgn0029681	28
CG42541	FBgn0260658	366	2.04	2e-05
CG2938	FBgn0029685	954	-1.16	5.7e-15
Glos	FBgn0029686	998	0.18	0.015
Gem4b	FBgn0052786	353	3.03	2e-08
Gem4c	FBgn0052783	222	0.8	0.0097
Vap33	FBgn0029687	12711	0.3	6.1e-30
lva	FBgn0029688	2962	-1.07	1.2e-36
CG6428	FBgn0029689	575	-1.77	2.1e-18
CG6414	FBgn0029690	57	-1.78	0.0012
asRNA:CR45481	FBgn0267037	936	6.18	9.4e-30
lncRNA:CR43298	FBgn0262990	11
lncRNA:CR45482	FBgn0267038	123	2.22	0.033
lncRNA:CR46247	FBgn0267969	23
lncRNA:CR46349	FBgn0286029	10
CG43689	FBgn0263772	755	2.65	3.7e-10
Cmtr1	FBgn0029693	2597	-0.07	0.033
CG15375	FBgn0029694	427	0.17	0.054
Xpac	FBgn0004832	2446	1.32	3.8e-27
brn	FBgn0000221	434	-0.47	0.0027
cib	FBgn0026084	7586	-1.71	7.2e-238
Nsun2	FBgn0026079	1737	0.03	0.065
dgt4	FBgn0026085	2702	0.45	3.9e-07
Tip60	FBgn0026080	1670	-0.21	0.0056
tyf	FBgn0026083	6820	0.37	1.7e-14
GlcAT-I	FBgn0066114	565	-0.79	2.7e-06
Fas2	FBgn0000635	11733	-2.53	0
CG43288	FBgn0262980	160	0.34	0.05
CG15571	FBgn0029696	1
CG15570	FBgn0029697	17
Femcoat	FBgn0041252	5
Muc4B	FBgn0052774	138	0.21	0.059
CG43134	FBgn0262608	18
CG43135	FBgn0262609	4
CG15576	FBgn0029700	896	0.09	0.061
CG12691	FBgn0029701	548	0.13	0.058
CG15572	FBgn0029702	762	-0.08	0.068
lncRNA:CR45483	FBgn0267039	55	1.49	0.021
CG15577	FBgn0040904	1472	0.49	0.0012
CG15578	FBgn0040905	969	-0.2	0.036
CG12692	FBgn0029703	623	-0.22	0.035
CG15579	FBgn0040906	1081	0.71	9.1e-05
lncRNA:CR44957	FBgn0266262	61	0.07	0.081
lncRNA:CR46156	FBgn0267868	24
mei-9	FBgn0002707	1113	0.45	0.00021
NO66	FBgn0266570	3460	1.21	1e-37
mRpL33	FBgn0040907	8940	-0.25	1.6e-11
norpA	FBgn0262738	5550	0.57	4.6e-17
CG12693	FBgn0029705	758	-0.06	0.073
mir-982	FBgn0262339	0
mir-303	FBgn0262390	6
CG3626	FBgn0029706	309	-3.92	1.3e-44
mir-983-1	FBgn0262235	0
mir-983-2	FBgn0262279	0
mir-984	FBgn0262282	10
asRNA:CR43614	FBgn0263589	1258	4.7	2.9e-16
lncRNA:CR46499	FBgn0288701	292	4.42	1.5e-18
FBgn0288701		114	4.28	2.6e-07
lncRNA:CR32773	FBgn0052773	1874	2.17	0.0042
bi	FBgn0000179	285	0.88	0.022
CG3556	FBgn0029708	219	4.35	3.5e-08
rb	FBgn0003210	3107	-0.05	0.04
CHOp24	FBgn0029709	4810	-0.61	7.6e-25
CG3568	FBgn0029710	603	0.76	2.6e-05
Usf	FBgn0029711	2570	-0.09	0.018
CG15912	FBgn0029712	773	2.88	4.5e-17
CG11436	FBgn0029713	581	-1.51	4.9e-18
CG3527	FBgn0029714	3477	0.03	0.049
CG11444	FBgn0029715	2395	-2.3	9.1e-128
CG3546	FBgn0029716	15
CG12684	FBgn0029717	1026	0.25	0.022
peb	FBgn0003053	2829	3.19	1.8e-87
Alms1b	FBgn0025387	823	-0.24	0.025
Alms1a	FBgn0025388	1841	0.43	4.2e-05
pon	FBgn0025739	1035	-1.19	3.1e-19
CG3081	FBgn0025613	1
CG3062	FBgn0025612	448	-0.19	0.046
HLH4C	FBgn0011277	4
mRpL30	FBgn0029718	4527	-0.69	5.1e-30
Torsin	FBgn0025615	2794	-1.4	1.1e-63
Cbp80	FBgn0022942	2740	0.28	6.2e-05
CG15473	FBgn0029719	1
CG3009	FBgn0029720	95	-0.19	0.064
fzr	FBgn0262699	1352	0.47	0.00015
Pp2C1	FBgn0022768	4994	0.66	2.8e-23
ctp	FBgn0011760	14170	0.94	8.1e-306
Pdha	FBgn0028325	3033	-0.92	3.3e-30
CG7024	FBgn0029722	586	0.18	0.044
Proc-R	FBgn0029723	77	-1.05	0.0062
CG15472	FBgn0029724	433	0.27	0.034
Klf15	FBgn0025679	0
lncRNA:CR45515	FBgn0267071	5
CG2871	FBgn0029725	1195	-0.04	0.077
CG15471	FBgn0029726	782	-0.34	0.016
CG6978	FBgn0029727	53	0.24	0.065
CG2861	FBgn0029728	1963	1.64	3.7e-19
lncRNA:CR45516	FBgn0267072	14
CG12682	FBgn0029729	280	0.43	0.025
CG42594	FBgn0260971	364	0.93	0.028
lncRNA:CR43495	FBgn0263506	120	0.24	0.055
boil	FBgn0029730	881	-0.22	0.028
CG6927	FBgn0029733	286	5.6	6.8e-11
CG32772	FBgn0052772	4575	-1.65	9.9e-129
CG4041	FBgn0029736	824	-0.77	1.5e-06
CG6903	FBgn0029737	2341	-1.12	2.8e-28
hpRNA:CR46342	FBgn0285992	3904	2.39	1.3e-128
CG44774	FBgn0266000	11923	1.93	0
Ptp4E	FBgn0004368	2438	-1.26	1.4e-31
lncRNA:CR44833	FBgn0266096	3952	3.89	3.2e-24
CG15468	FBgn0061196	598	0.85	0.00099
lncRNA:CR45792	FBgn0267442	51	0.25	0.061
CG12680	FBgn0029740	310	-0.26	0.051
ovo	FBgn0003028	5112	5.32	7.40000000000001e-310
CG32767	FBgn0052767	8125	0.4	2.2e-15
rg	FBgn0266098	71	1	0.022
CG15465	FBgn0029746	0
Rpn13R	FBgn0029745	432	0.71	0.0057
CG5062	FBgn0029747	548	0.23	0.038
lncRNA:CR44834	FBgn0266097	319	0.43	0.025
CG42749	FBgn0261803	69	0.28	0.057
CG3323	FBgn0029750	1623	0.4	0.0015
CG17764	FBgn0029751	596	1.72	1.3e-06
Cdk7	FBgn0263237	2702	1.04	2.1e-22
snf	FBgn0003449	6695	0.97	5.4e-64
TrxT	FBgn0029752	3063	0.72	1.6e-07
dhd	FBgn0011761	3857	4.64	1.5e-177
CG4198	FBgn0029753	905	0.67	0.0014
CG15930	FBgn0029754	5202	4	6.3e-293
Sas10	FBgn0029755	2595	0.34	2.4e-06
Rnp4F	FBgn0014024	4473	1.81	1.9e-103
Mcm3	FBgn0284442	3364	1.93	4.8e-92
CG3309	FBgn0029756	473	-0.16	0.037
XRCC1	FBgn0026751	3345	-0.01	0.083
CanB	FBgn0010014	41
SK	FBgn0029761	505	-1.78	6.7e-11
NAAT1	FBgn0029762	64	-2.8	3.9e-05
spoon	FBgn0263987	8007	-0.08	0.003
Usp16-45	FBgn0029763	1702	-0.06	0.043
CG16756	FBgn0029765	138	-1.17	0.016
lncRNA:CR45517	FBgn0267073	335	-4.69	1.1e-50
CG15784	FBgn0029766	1806	-5.22	0
lncRNA:CR44471	FBgn0265664	6
SPR	FBgn0029768	27
frma	FBgn0029769	113	-3.41	0.00025
CG32762	FBgn0052762	1
CG4151	FBgn0029770	0
lncRNA:CR45519	FBgn0267075	1
CG12730	FBgn0029771	859	-4.65	2.2e-120
asRNA:CR45518	FBgn0267074	13
snoRNA:Psi28S-3342	FBgn0086667	1416	-0.95	3.9e-18
Vsx2	FBgn0263512	18
Vsx1	FBgn0263511	11
CG34435	FBgn0085464	272	0.12	0.067
CG34434	FBgn0250904	2895	2.05	5.3e-42
RhoGAP5A	FBgn0029778	1094	-1.02	8.2e-14
Mlc-c	FBgn0004687	8179	-1.74	0
mir-3645	FBgn0263631	4
Pop1	FBgn0026702	859	0.23	0.0089
OtopLa	FBgn0259994	651	0.55	0.0025
OtopLc	FBgn0259150	237	2.03	0.00046
asRNA:CR45520	FBgn0267076	30
Sirt4	FBgn0029783	1242	0.65	6.6e-06
CG4119	FBgn0028474	2573	0.14	0.0062
Rab18	FBgn0015794	3269	-1.7	2.6e-98
RpL35	FBgn0029785	21527	-0.29	2.5e-61
Tre1	FBgn0046687	2960	-5.18	0
Gr5a	FBgn0003747	3
asRNA:CR44958	FBgn0266263	13
CG42449	FBgn0259926	0
PGAP1	FBgn0029789	333	-0.96	7.8e-06
asRNA:CR45525	FBgn0267081	11
cv	FBgn0000394	955	-0.87	7.9e-09
CG3149	FBgn0027564	738	-1.09	1.4e-10
lncRNA:CR42794	FBgn0261927	31
AdamTS-B	FBgn0029791	1316	-7.83	4.1e-108
CG33080	FBgn0053080	117	-3.86	3.6e-08
Snx27	FBgn0052758	3057	-1.85	3.1e-78
CG15773	FBgn0029795	9
IntS6	FBgn0261383	3314	0.03	0.062
Rtel1	FBgn0029798	664	0.93	1.6e-06
CG15772	FBgn0029799	139	0.01	0.089
lin-52	FBgn0029800	2696	1.26	2.3e-31
asRNA:CR45528	FBgn0267084	342	0.7	0.0015
CG15771	FBgn0029801	3256	-0.11	0.0086
MAPk-Ak2	FBgn0013987	2366	-1.39	1.9e-46
CG42699	FBgn0261610	1456	-0.01	0.086
CG3097	FBgn0029804	138	-2.93	2.1e-07
CG42264	FBgn0259149	13
CG3108	FBgn0029807	1
CG15767	FBgn0029809	147	0.15	0.068
mir-4963	FBgn0263545	0
lncRNA:CR44832	FBgn0266095	28
CG12239	FBgn0029810	39
Cpr5C	FBgn0029811	6
Prosbeta2R1	FBgn0029812	508	0.56	0.0097
lncRNA:CR45529	FBgn0267085	3
CG44329	FBgn0265417	242	0.86	0.0014
AgmNAT	FBgn0029813	278	-4.33	5.9e-39
CG15765	FBgn0029814	40
lncRNA:CR43264	FBgn0262945	15839	4.15	0
tRNA:Glu-CTC-6-1Psi	FBgn0052761	0
CG12729	FBgn0029816	651	-0.15	0.049
CG43136	FBgn0262610	466	-0.17	0.053
CG43137	FBgn0262611	516	0.03	0.083
CG15764	FBgn0029817	693	0.22	0.038
GAA1	FBgn0029818	1724	-0.86	8.5e-16
mof	FBgn0014340	1596	1.07	2.9e-13
Usp30	FBgn0029819	1940	0.12	0.02
CG16721	FBgn0029820	3048	-2.03	3.6e-112
lncRNA:CR45668	FBgn0267228	706	-1.23	3.1e-05
Act5C	FBgn0000042	16126	-1.3	0
CG4020	FBgn0029821	210	0.68	0.013
CG12236	FBgn0029822	1509	0.87	4.2e-06
Shmt	FBgn0029823	4634	-0.5	1.7e-14
asRNA:CR44108	FBgn0264939	3
CG3726	FBgn0029824	7121	-1.94	0
CG12728	FBgn0029825	2382	2.09	1.8e-49
CG32756	FBgn0052756	2216	1.41	1.8e-26
CG6041	FBgn0029826	620	-0.29	0.012
CG32755	FBgn0052755	168	-0.43	0.029
CG6048	FBgn0029827	5
CG6067	FBgn0029828	323	-5.8	2.6e-43
fs(1)M3	FBgn0005390	143	2.94	5e-07
Grip	FBgn0029830	1353	1.26	3.9e-16
CG5966	FBgn0029831	231	-2.04	4.9e-09
CG4766	FBgn0027546	0
lncRNA:CR44498	FBgn0265691	2
mab-21	FBgn0029003	5
lncRNA:CR44499	FBgn0265692	0
rux	FBgn0003302	878	0.23	0.016
MCTS1	FBgn0029833	3302	-0.4	6.1e-07
CG5937	FBgn0029834	28
CG5921	FBgn0029835	48
CG43115	FBgn0262575	335	-0.4	0.024
CG5928	FBgn0029836	4
Tsp5D	FBgn0029837	87	-3.49	7.8e-08
CG4666	FBgn0029838	35
CG4660	FBgn0029839	4
raptor	FBgn0029840	2340	-0.17	0.0033
Mipp2	FBgn0026060	585	-0.93	0.00014
asRNA:CR44959	FBgn0266264	11
Nep1	FBgn0029843	465	-0.19	0.044
Ca-alpha1T	FBgn0264386	1446	2.63	7.6e-17
CG32750	FBgn0052750	0
CG32751	FBgn0052751	0
CG43090	FBgn0262536	0
vanin-like	FBgn0040069	1
Btnd	FBgn0029848	4
Efr	FBgn0029849	788	-1.49	5.9e-15
sqh	FBgn0003514	7729	-2.1	0
dtn	FBgn0262730	2888	0.15	0.007
CG14445	FBgn0029851	14
Rbcn-3A	FBgn0023458	1581	-1.61	3e-43
Spx	FBgn0015818	2941	0.53	7.2e-10
schlank	FBgn0040918	6877	-0.78	2.2e-68
CG3781	FBgn0029853	1141	-1.25	2.2e-19
Spt6	FBgn0028982	4691	0.31	2.6e-08
CG3566	FBgn0029854	5883	-1.05	6.2e-84
Ubi-p5E	FBgn0086558	7260	-1.16	4.2e-137
lncRNA:CR45530	FBgn0267086	72	-2.09	5.7e-08
CG11700	FBgn0029856	445	-0.34	0.013
Top3beta	FBgn0026015	3151	-2.25	3.2e-212
wuho	FBgn0029857	2577	-0.23	0.00058
Rpt4	FBgn0028685	4395	-0.52	3.3e-16
mldr	FBgn0029858	497	-0.7	0.00012
CG15892	FBgn0029859	2577	0.02	0.077
CG15891	FBgn0029860	3819	-0.83	5e-29
CG3815	FBgn0029861	1167	0.02	0.08
CG12219	FBgn0043796	891	-0.07	0.052
CG3823	FBgn0029863	81	1.49	0.026
CG15894	FBgn0029864	64	1.91	0.011
CG42240	FBgn0250869	474	-3.31	4.5e-54
CG3842	FBgn0029866	36
CG3847	FBgn0029867	2677	0.43	1.7e-06
ND-B16.6	FBgn0029868	8169	-0.7	8.3e-67
kdn	FBgn0261955	4658	0.02	0.055
swa	FBgn0003655	437	4.01	4.7e-15
Marf	FBgn0029870	5548	-1.2	9e-93
lncRNA:CR44816	FBgn0266051	487	-0.35	0.0051
PpV	FBgn0003139	3018	0.46	3.5e-09
CG33664	FBgn0053664	3
CG33669	FBgn0053669	1
CG33668	FBgn0053668	334	0.83	0.0075
CG42340	FBgn0259242	2219	1.52	5.6e-20
CG33667	FBgn0053667	286	-0.07	0.079
CG33666	FBgn0053666	1212	0.21	0.026
CG33665	FBgn0053665	154	-0.3	0.043
tRNA:Phe-GAA-1-1	FBgn0052748	0
CG3918	FBgn0029873	3136	0.44	3.1e-08
CG3342	FBgn0029874	692	-0.42	0.0014
Agxt	FBgn0014031	408	-4	1.7e-23
RpL7A	FBgn0014026	21424	-0.49	1.9e-184
snoRNA:Or-CD10	FBgn0065071	0
dx	FBgn0000524	1217	-0.62	6e-08
CG34417	FBgn0085446	2823	-5.05	2.2e-305
CG17717	FBgn0029877	696	0.22	0.034
Pat1	FBgn0029878	6134	-0.23	7.2e-07
lncRNA:CR43832	FBgn0264380	7
APC7	FBgn0029879	60	-2.6	0.00027
pigs	FBgn0029881	4142	-3.32	0
CG14443	FBgn0029880	357	1.15	2.5e-05
lncRNA:CR44817	FBgn0266052	30
CG3226	FBgn0029882	6761	0.54	9.4e-28
Cdc7	FBgn0028360	2242	-0.22	0.002
CG3224	FBgn0029885	5817	-0.63	2.9e-32
Ctr1A	FBgn0062413	1849	-3.72	6.5e-138
CG3198	FBgn0029887	3913	-0.3	2.6e-07
Mcm6	FBgn0025815	3425	1.21	2.8e-48
ND-ASHI	FBgn0029888	5875	-1.17	6.7e-111
Fum1	FBgn0286222	4025	-1.95	1.5e-213
Fum2	FBgn0029890	798	0.18	0.03
Pink1	FBgn0029891	4706	-0.36	8.8e-09
CG44303	FBgn0265362	5296	2.67	1.7e-150
CG3184	FBgn0029892	1747	0.2	0.0057
CG14442	FBgn0029893	3811	-0.83	1.9e-26
CG14440	FBgn0029894	944	0.44	0.00024
CG14441	FBgn0029895	3620	-0.09	0.014
CG3168	FBgn0029896	3439	-6.39	0
lncRNA:CR43461	FBgn0263415	2746	1.42	8.9e-14
RpL17	FBgn0029897	22042	-0.5	8.3e-226
snoRNA:Psi28S-3436b	FBgn0086602	22
snoRNA:Psi28S-3436a	FBgn0086668	4
snoRNA:Psi28S-1060	FBgn0083013	15
snoRNA:Psi28S-1232	FBgn0082997	3
tRNA:Phe-GAA-1-2	FBgn0052740	0
lncRNA:CR44895	FBgn0266200	54	-0.9	0.024
lncRNA:CR44964	FBgn0266279	22
CG14439	FBgn0029898	78	-1.17	0.0032
sov	FBgn0287725	4551	-0.17	0.00016
lncRNA:CR43496	FBgn0263507	718	-1.05	2.2e-07
Coq7	FBgn0029502	5042	-0.9	2.7e-47
shf	FBgn0003390	226	-3.44	1.9e-20
C3G	FBgn0259228	2787	-0.63	2.1e-13
pod1	FBgn0029903	3463	-0.62	9e-19
iav	FBgn0086693	15
Nf-YC	FBgn0029905	1731	-0.06	0.042
xit	FBgn0029906	560	-1.43	3.9e-12
Atx-1	FBgn0029907	165	-0.66	0.003
nonC	FBgn0263968	2058	0.47	9.3e-07
mAChR-C	FBgn0029909	1
CG14435	FBgn0029911	1558	-1.93	2.3e-60
CG4557	FBgn0029912	905	-0.36	0.0017
Cht11	FBgn0029913	264	-0.69	0.0007
CG4558	FBgn0029914	670	-1.71	8.1e-21
CG14434	FBgn0029915	5435	0.35	6.5e-11
lncRNA:CR45531	FBgn0267087	54	-0.94	0.0093
CG43736	FBgn0263993	8555	-1.13	5.1e-187
CG14431	FBgn0029922	189	-3.02	2.8e-06
Setd3	FBgn0052732	1379	-0.58	7.6e-08
CG4586	FBgn0029924	164	-2.84	6.7e-15
CG3040	FBgn0029925	1308	-0.82	4.6e-11
ogre	FBgn0004646	4741	-6.4	0
lncRNA:CR44084	FBgn0264893	5
bou	FBgn0261284	1408	-5.21	2.2e-276
Inx7	FBgn0027106	285	-5.65	7.3e-53
lncRNA:CR43837	FBgn0264385	64	-5.59	3.6e-12
Inx2	FBgn0027108	4163	-5.55	0
cm	FBgn0000330	858	-0.87	4e-08
CG32736	FBgn0052736	0
CG42308	FBgn0259204	0
CG3032	FBgn0029928	299	0.14	0.049
CG4593	FBgn0029929	2599	-0.79	7.7e-19
CG12541	FBgn0029930	210	3.52	1.8e-06
CG14427	FBgn0029931	0
nullo	FBgn0004143	0
CG4607	FBgn0029932	72	-0.62	0.034
Sxl	FBgn0264270	6773	-1.29	2.2e-58
mir-4956	FBgn0263563	0
CG4615	FBgn0029935	588	-0.81	1.6e-05
CG4617	FBgn0029936	1578	0.43	8.1e-05
CG8300	FBgn0029937	3731	-0.22	0.00019
fz4	FBgn0027342	1500	-1.17	8.3e-22
lncRNA:CR45532	FBgn0267088	3
lncRNA:CR46245	FBgn0267965	1
CG9650	FBgn0029939	1794	4.37	1.1e-28
lncRNA:CR32730	FBgn0047092	69	0.5	0.043
lncRNA:CR44357	FBgn0265457	1896	6.49	0.00023
CG1958	FBgn0029940	1249	0.19	0.026
CG1677	FBgn0029941	4484	0.22	2.5e-05
CG2059	FBgn0029942	2115	-0.48	6.4e-07
unc-119	FBgn0025549	6209	0.27	6.5e-08
brk	FBgn0024250	2008	-2.68	3.1e-178
Atg5	FBgn0029943	684	-0.76	2.9e-07
Dok	FBgn0029944	2832	-1.36	6.7e-61
Acsf3	FBgn0029945	396	-0.11	0.066
CG42780	FBgn0261848	44
CBP	FBgn0026144	3590	1.93	1.4e-64
CG15034	FBgn0029946	2073	0.76	2e-06
CG1999	FBgn0029947	2031	-0.11	0.035
CheA7a	FBgn0029948	3
CG42781	FBgn0261849	247	-0.29	0.04
CG15035	FBgn0029949	821	0.63	0.0016
CG32727	FBgn0265265	889	-0.13	0.048
CG42246	FBgn0259098	11
CG42704	FBgn0261615	15
CG42705	FBgn0261616	1
CG34337	FBgn0085366	1
rumpel	FBgn0029950	2
CG15036	FBgn0040922	0
CG32726	FBgn0052726	8
lncRNA:CR45533	FBgn0267089	4
lncRNA:CR43199	FBgn0262828	92	-0.97	0.023
CG11368	FBgn0040923	5
CG43198	FBgn0262827	108	0.21	0.066
lncRNA:CR44500	FBgn0265693	12
lncRNA:CR45534	FBgn0267090	7
lncRNA:CR43278	FBgn0262967	1960	0.09	0.047
lncRNA:CR43279	FBgn0262968	818	-0.11	0.057
lncRNA:CR43835	FBgn0264383	624	0.45	0.015
CG32719	FBgn0052719	1230	-0.57	0.0016
CG43138	FBgn0262612	437	0.2	0.052
CG32720	FBgn0052720	390	-0.07	0.077
lncRNA:CR44501	FBgn0265694	21
lncRNA:CR44502	FBgn0265695	24
CG11369	FBgn0029951	953	-0.34	0.0085
CG12689	FBgn0029952	1439	0.08	0.058
ct	FBgn0004198	1469	-3.91	1.3e-147
lncRNA:CR45667	FBgn0267227	74	4.01	0.0019
lncRNA:CR45666	FBgn0267226	49
lncRNA:CR45665	FBgn0267225	108	4.16	6.6e-05
CHES-1-like	FBgn0029504	4471	-2.2	1.6e-225
lncRNA:CR43287	FBgn0262979	312	0.39	0.018
CG15478	FBgn0029955	7
Hira	FBgn0022786	841	0.04	0.069
NELF-B	FBgn0027553	1033	1.27	1.2e-11
CG12155	FBgn0029957	1916	0.38	4.8e-05
Pdp	FBgn0029958	2000	0.95	3.2e-13
Rab39	FBgn0029959	1855	-1.41	3.3e-35
Tom40	FBgn0016041	4450	-0.17	0.00032
Ir7a	FBgn0029961	1
CG34338	FBgn0085367	0
CG32718	FBgn0052718	451	0.03	0.084
CARPA	FBgn0029962	3
CG10920	FBgn0029963	1152	0.25	0.02
CG1409	FBgn0029964	396	0.32	0.032
Ir7b	FBgn0029965	12
dec	FBgn0000427	759	-5.13	1.4e-114
asRNA:CR43615	FBgn0263590	86	-1.53	0.0093
Ir7c	FBgn0029966	5
Ir7d	FBgn0259190	0
Ir7e	FBgn0259189	1
Ir7f	FBgn0259188	7
Ir7g	FBgn0029968	2
Acat1	FBgn0029969	1384	-3.03	5.7e-110
Nek2	FBgn0029970	76	-3.56	3.2e-11
CG45089	FBgn0266490	0
ND-MNLL	FBgn0029971	623	-1.33	9.1e-13
p115	FBgn0040087	1820	0.56	5.7e-07
RpS6	FBgn0261592	19760	-0.39	1.3e-100
snoRNA:Or-aca2	FBgn0082924	0
bys	FBgn0010292	2983	0.75	5.3e-17
dpr14	FBgn0029974	257	1.01	0.0015
spidey	FBgn0029975	4186	-2.38	2.1e-295
snz	FBgn0029976	1841	-2.54	3e-121
hdm	FBgn0029977	188	5.57	2.2e-07
Ykt6	FBgn0260858	2586	-0.92	1.8e-24
mahe	FBgn0029979	11074	2.61	0
Dhdds	FBgn0029980	1576	-0.04	0.065
RpS14a	FBgn0004403	20649	-0.24	3.2e-36
RpS14b	FBgn0004404	11299	-0.18	1.5e-11
Ubr3	FBgn0260970	5551	-0.35	2.2e-11
orion	FBgn0027280	4834	-3.89	0
CG15332	FBgn0029986	281	2.38	2.1e-07
CG15330	FBgn0029987	488	0.64	0.0024
sws	FBgn0003656	3874	0.2	0.0032
asRNA:CR45620	FBgn0267180	356	0.55	0.0038
sn	FBgn0003447	3878	0.94	1.2e-28
Tbh	FBgn0010329	1038	2.17	1e-08
CG15333	FBgn0029989	402	-0.01	0.09
CG2233	FBgn0029990	1667	-2.95	3.6e-84
fs(1)h	FBgn0004656	9817	-1.44	2.4e-240
mys	FBgn0004657	4654	-2.68	0
Upf2	FBgn0029992	1939	0.53	2.4e-07
CG1571	FBgn0029993	413	-0.21	0.05
Ldsdh1	FBgn0029994	121	-1.54	0.00023
CG2256	FBgn0029995	13
asRNA:CR45535	FBgn0267091	0
UbcE2H	FBgn0029996	4183	-3.36	0
CG2258	FBgn0029997	2289	-0.14	0.007
Gclc	FBgn0040319	1853	-2.18	2.1e-65
CG1575	FBgn0029999	1214	0.26	0.0029
CG2260	FBgn0030000	1959	0.45	1.6e-06
cyr	FBgn0030001	52	-0.47	0.037
CG2116	FBgn0030003	1699	-0.34	0.0002
CG10958	FBgn0030004	792	-0.46	0.0027
CG2120	FBgn0030005	5
Smox	FBgn0025800	6279	-0.3	7.3e-11
CG17982	FBgn0030006	1187	-2.6	1.5e-70
alpha-PheRS	FBgn0030007	3521	-0.18	0.00063
CG2129	FBgn0030008	766	-0.12	0.035
CG15336	FBgn0030009	5
CG10959	FBgn0030010	427	0.14	0.044
Gbeta5	FBgn0030011	890	2.2	1.8e-18
CG18262	FBgn0030012	1677	0.48	5.8e-05
Traf6	FBgn0265464	648	-0.42	0.00084
GIIIspla2	FBgn0030013	1338	-0.16	0.014
CG15337	FBgn0030014	254	-0.05	0.082
CG10761	FBgn0030015	441	1.17	0.00043
lncRNA:CR45536	FBgn0267096	1
Or7a	FBgn0030016	5
CG2278	FBgn0030017	347	-0.21	0.023
slpr	FBgn0030018	3959	0.22	5.1e-05
sdt	FBgn0261873	2789	-1.92	1.9e-63
CG2147	FBgn0030025	4305	-0.16	0.00079
sni	FBgn0030026	3359	-0.51	1.1e-10
Trxr1	FBgn0020653	5456	-0.36	1.6e-10
ND-75	FBgn0017566	4371	-0.66	9.9e-25
CG1632	FBgn0030027	83	-0.14	0.071
Corp	FBgn0030028	713	3.8	2.9e-11
CG15343	FBgn0030029	121	-0.89	0.0057
CG1636	FBgn0030030	1708	-0.86	1.3e-14
nAChRalpha3	FBgn0015519	867	-0.99	3.7e-05
lncRNA:CR43695	FBgn0263778	19
CG1387	FBgn0030033	733	0.26	0.025
CG10555	FBgn0030034	3268	-1.06	2.1e-45
PIG-T	FBgn0030035	3758	-0.83	1.1e-29
lawc	FBgn0262976	2643	-1.54	1.3e-45
Trf2	FBgn0261793	12421	1.34	0
CG32712	FBgn0052712	99	-3.45	3.7e-11
Miga	FBgn0030037	1992	0.7	1.8e-09
CG1440	FBgn0030038	4303	-0.51	3.9e-13
CG12123	FBgn0030039	1132	-0.44	0.0003
org-1	FBgn0021767	28
CG32713	FBgn0052713	1130	0.09	0.055
CG15347	FBgn0030040	857	-1.59	3.2e-20
Es2	FBgn0023506	652	-0.32	0.0064
Sptr	FBgn0014032	487	-3.49	9e-48
CG33223	FBgn0053223	633	2.85	2.4e-05
CG12116	FBgn0030041	642	0.03	0.077
Cp7Fa	FBgn0014464	31
Cp7Fb	FBgn0014465	63	0.68	0.036
Cp7Fc	FBgn0014466	5
Cp36	FBgn0000359	11
Cp38	FBgn0000360	42
lncRNA:CR43834	FBgn0264382	41
otu	FBgn0003023	1176	4.27	2e-43
CG33181	FBgn0053181	3957	3.61	2.2e-51
Nrg	FBgn0264975	10245	-2.07	0
PIP82	FBgn0024943	21
IntS4	FBgn0026679	1044	0.45	0.00016
CG12112	FBgn0030048	1788	-1.94	2.1e-61
Trf4-1	FBgn0030049	4237	0.02	0.065
asRNA:CR46195	FBgn0267914	122	-2.33	1.8e-06
CG12111	FBgn0030050	875	-2.27	2.1e-59
spirit	FBgn0030051	27
CG12065	FBgn0030052	3225	-3.62	0
CG12081	FBgn0030053	1857	-0.17	0.0072
CG12659	FBgn0040929	1438	1.18	7.5e-11
Crag	FBgn0025864	3363	-0.62	5.7e-17
Caf1-180	FBgn0030054	2720	1.33	2.5e-40
oc	FBgn0004102	114	-3.2	2e-06
Rubicon	FBgn0030055	674	-0.47	0.00064
CAH3	FBgn0030056	4377	-1.4	2.7e-106
Ppt1	FBgn0030057	2739	-2.62	1.5e-210
Ogg1	FBgn0027864	604	-0.25	0.011
CG11294	FBgn0030058	448	0.82	0.0054
lncRNA:CR44507	FBgn0265700	16
lncRNA:CR44508	FBgn0265701	11
Hexo2	FBgn0041629	1426	-5.64	0
CG2004	FBgn0030060	2435	-0.97	1.4e-22
CG1785	FBgn0030061	3370	0.59	1.2e-13
l(1)G0020	FBgn0027330	2156	1.06	6.5e-23
CG1789	FBgn0030063	4175	0.35	4.8e-08
lncRNA:CR43297	FBgn0262989	303	-0.09	0.073
Lim1	FBgn0026411	64	-0.38	0.044
lncRNA:CR45537	FBgn0267097	172	0.89	0.03
CG12075	FBgn0030065	84	-4.93	6.9e-16
Moe	FBgn0011661	10859	-0.94	2.7e-190
Uros1	FBgn0030066	1146	0.91	2.1e-07
Rbm13	FBgn0030067	3115	-0.03	0.053
e(r)	FBgn0011586	8717	0.59	1.8e-38
rdgA	FBgn0261549	5909	-0.88	2.7e-22
lncRNA:CR44111	FBgn0264942	112	-1.3	0.0008
CG12661	FBgn0030071	229	0.12	0.072
CG43255	FBgn0262900	57	-1.14	0.00069
mir-4964	FBgn0263519	1
lncRNA:CR43836	FBgn0264384	1227	0	0.091
CG10962	FBgn0030073	49
CG12662	FBgn0030074	7
mir-31b	FBgn0262369	0
Nost	FBgn0259734	1130	-1.48	2.8e-16
CG15365	FBgn0030077	1572	-6.96	1.2e-117
CG10970	FBgn0030078	313	-0.84	0.0019
asRNA:CR45538	FBgn0267098	49
CG44325	FBgn0265413	5601	-5.25	0
CG7246	FBgn0030081	1580	0.59	3.5e-07
HP1b	FBgn0030082	2111	-1.45	2.2e-44
APC4	FBgn0052707	1016	0.71	2.7e-06
CG32708	FBgn0052708	2433	0.8	2.9e-14
CG32706	FBgn0052706	1319	1.01	1.3e-11
CG6999	FBgn0030085	859	1.4	1.3e-14
CCT2	FBgn0030086	7826	0.17	1.1e-06
mir-13b-2	FBgn0262421	0
CG7766	FBgn0030087	2745	-0.96	5.1e-25
Bx42	FBgn0004856	3422	0.47	2e-08
Arfrp1	FBgn0030088	1961	0.64	1.3e-07
AP-1gamma	FBgn0030089	5298	-0.87	1.6e-43
lncRNA:CR45539	FBgn0267099	0
fend	FBgn0030090	4397	-3.59	0
lncRNA:CR44517	FBgn0265710	52	-3.03	3.6e-06
CG7065	FBgn0030091	3751	-0.75	7.7e-23
fh	FBgn0030092	1412	-1.02	5.8e-17
Bap111	FBgn0030093	2516	-0.18	0.0025
His3.3B	FBgn0004828	13475	0.22	1.1e-19
Ost48	FBgn0014868	4298	-0.3	1.4e-07
Dlip1	FBgn0040467	927	-0.52	0.00014
CG9034	FBgn0040931	10294	-0.58	8.8e-64
Zpr1	FBgn0030096	1105	0.31	0.0015
CG44532	FBgn0265725	1305	2.83	1.2e-30
mei-P26	FBgn0026206	9847	2.42	0
CG12115	FBgn0030097	10
CG12057	FBgn0030098	1
CG12056	FBgn0030099	937	-0.45	0.00022
CG12106	FBgn0030100	662	-0.01	0.088
CG12118	FBgn0030101	2619	-0.64	5.2e-11
su(r)	FBgn0086450	98	-1.97	0.00024
SmydA-9	FBgn0030102	46
Obp8a	FBgn0030103	11
CG15368	FBgn0030104	441	0.45	0.014
CG15369	FBgn0030105	6
t	FBgn0086367	151	-0.18	0.064
CG15370	FBgn0030107	9
Gr8a	FBgn0030108	0
CG12121	FBgn0030109	2896	-0.79	1.4e-22
Ir8a	FBgn0052704	8
mir-4916	FBgn0263578	0
mxc	FBgn0260789	3743	1.73	6.7e-72
Larp7	FBgn0260771	1014	-0.01	0.087
amx	FBgn0000077	632	-2.1	1e-26
Dsor1	FBgn0010269	1902	0.23	0.0038
CG17754	FBgn0030114	2241	-1.04	5e-11
ric8a	FBgn0028292	1682	-0.46	5.2e-06
Erk7	FBgn0052703	1456	0.45	0.0028
CG17440	FBgn0030120	387	0.53	0.01
Cfp1	FBgn0030121	1544	0.57	9.2e-06
Aladin	FBgn0030122	1664	0.99	2.4e-13
snoRNA:CG16892-a	FBgn0263475	0
c11.1	FBgn0040236	1663	-1.4	6.3e-34
lz	FBgn0002576	22
lncRNA:CR44534	FBgn0265727	81	0.33	0.051
c12.1	FBgn0040235	4397	0.06	0.025
c12.2	FBgn0040234	449	-1.55	7.7e-13
Zdhhc8	FBgn0085478	6671	-1.37	4.2e-57
CG34450	FBgn0085479	709	0.12	0.055
BCL7-like	FBgn0026149	2987	-0.42	1.3e-08
mgl	FBgn0261260	6458	-5.3	0
CG44815	FBgn0266050	12
CG32700	FBgn0267253	558	-0.6	0.012
CG34028	FBgn0054028	0
CG34026	FBgn0054026	0
l(1)G0320	FBgn0028327	4069	-1.67	2.7e-153
RpS28b	FBgn0030136	21954	-0.38	4.1e-119
CG15317	FBgn0030137	1261	-0.45	5.2e-05
lncRNA:CR42767	FBgn0261835	2446	0.66	7.1e-06
Cubn	FBgn0052702	411	-3.17	1.4e-35
LPCAT	FBgn0052699	2465	-1.94	4.6e-97
CG42395	FBgn0259741	350	0.71	0.0043
lncRNA:CR45540	FBgn0267100	6
lncRNA:CR45541	FBgn0267101	3
Hex-A	FBgn0001186	7102	-3.43	0
lncRNA:CR45542	FBgn0267102	13
lncRNA:CR45543	FBgn0267103	3
Gga	FBgn0030141	1494	-0.39	7.7e-05
Lst8	FBgn0264691	2431	-0.18	0.0022
LysRS	FBgn0027084	3800	0.31	3.5e-07
Hecw	FBgn0261931	2144	0.41	0.00033
Ptpmeg2	FBgn0028341	4039	-1.98	2.1e-95
CG3106	FBgn0030148	5
nej	FBgn0261617	7623	-0.06	0.0078
lncRNA:CR42657	FBgn0261522	1189	-0.32	0.0092
lncRNA:CR44016	FBgn0264786	1
btd	FBgn0000233	6
lncRNA:CR43498	FBgn0263509	83	0.26	0.06
Sp1	FBgn0020378	22
CG1354	FBgn0030151	4825	-0.9	2.6e-42
CARPB	FBgn0052698	863	-1.23	0.00011
Ser7	FBgn0019929	106	-3.93	9.8e-06
CG45060	FBgn0266430	0
CG45061	FBgn0266431	5
CG32695	FBgn0052695	259	-5	4.8e-14
CG15247	FBgn0030156	85	-3.84	1.2e-10
CG1468	FBgn0030157	341	-2.44	1.9e-06
CG9686	FBgn0030158	94	-5.72	1.5e-12
CG9689	FBgn0030159	751	-2.38	1.7e-29
CG9691	FBgn0030160	3544	-5.43	0
CG15249	FBgn0030161	11
CG1986	FBgn0030162	3
Idgf4	FBgn0026415	393	-2.55	7e-15
snoRNA:Me28S-U1688	FBgn0086044	0
CG1791	FBgn0030163	1
CG1889	FBgn0030164	12
CG43386	FBgn0263216	2
CG15252	FBgn0030167	6
CG32694	FBgn0052694	25
CG33557	FBgn0053557	88	-1.49	0.00031
Dna2	FBgn0288690	479	1.17	2.2e-07
Cht6	FBgn0263132	276	0.85	0.0037
asRNA:CR45185	FBgn0267495	71	-0.91	0.0037
Yp2	FBgn0005391	25
Yp1	FBgn0004045	16
asRNA:CR45601	FBgn0267161	0
CG15312	FBgn0030174	1453	2.28	6.7e-16
Gr9a	FBgn0052693	1
lncRNA:CR45602	FBgn0267162	44
ZAP3	FBgn0052685	4430	-0.55	2.2e-17
CG2972	FBgn0030177	1499	-0.28	0.00086
Naxe	FBgn0030178	1077	0.53	0.00013
RhoU	FBgn0083940	2360	1.39	8e-14
asRNA:CR44894	FBgn0266199	1383	3.5	7.3e-05
snoRNA:Me18S-A627	FBgn0086045	1
CG12645	FBgn0030181	120	-0.72	0.017
CG43902	FBgn0264503	152	-0.35	0.048
lncRNA:CR32690	FBgn0052690	2662	0.35	0.0014
Ypel	FBgn0030183	3421	0.63	1.5e-10
lncRNA:CR43899	FBgn0264500	181	3.41	1.9e-06
ATPsyndelta	FBgn0028342	9776	-1.2	3.1e-274
CG2962	FBgn0030186	10
asRNA:CR45629	FBgn0267189	5
CG15308	FBgn0040941	1
CG34408	FBgn0085437	1163	-1.17	3.8e-12
CG2961	FBgn0030187	0
Hk	FBgn0263220	512	2.67	2.9e-08
asRNA:CR43959	FBgn0264674	18
CG12643	FBgn0040942	460	-4.05	2.5e-59
alpha-Man-Ia	FBgn0259170	6436	-1.06	3e-50
CG2909	FBgn0030189	723	-0.3	0.0062
Gip	FBgn0011770	1776	-0.8	3.4e-14
CG15306	FBgn0030191	2784	0.12	0.031
CG43740	FBgn0263997	33
snoRNA:U3:9B	FBgn0065046	27
l(1)G0289	FBgn0028331	4658	-2.73	0
CG32679	FBgn0052679	266	3.5	1.1e-06
CG17841	FBgn0028480	3096	-1.01	3.8e-23
CG32686	FBgn0052686	698	0.02	0.085
CG2898	FBgn0030195	458	0.3	0.027
CG32681	FBgn0052681	116	-2.39	8.8e-05
Psf3	FBgn0030196	3344	-0.29	8.9e-05
flw	FBgn0000711	5700	-0.74	1.3e-35
CG32683	FBgn0052683	97	-1.31	0.015
RabX2	FBgn0030200	201	0.62	0.027
CG12640	FBgn0030202	0
snoRNA:Me28S-A1705	FBgn0086046	0
Or9a	FBgn0030204	25
Neb-cGP	FBgn0083167	13518	-1.32	0
nocte	FBgn0261710	7990	-0.04	0.018
CG2889	FBgn0030206	1411	0.1	0.034
CG2887	FBgn0030207	932	3.76	1e-22
PPP4R2r	FBgn0030208	3194	-0.6	4e-16
CG32687	FBgn0052687	1199	-5.52	2.5e-193
spri	FBgn0085443	5052	-2.67	3.4e-135
CG15296	FBgn0030215	664	-0.13	0.054
Rab9D	FBgn0067052	6
Hmr	FBgn0001206	1594	1.27	1.3e-17
CG2124	FBgn0030217	679	0.32	0.0055
CG1628	FBgn0030218	1307	-3.08	6.1e-90
CG43347	FBgn0263072	331	-0.54	0.019
Rab9Db	FBgn0030221	22
CG9806	FBgn0030222	8
X11Lbeta	FBgn0052677	1501	1.83	2.5e-13
CG2111	FBgn0030223	16
Rab9E	FBgn0052673	27
CG12637	FBgn0030224	510	-0.51	0.012
stx	FBgn0052676	6048	-0.87	2.3e-56
ras	FBgn0003204	3331	-0.82	6.5e-26
lncRNA:CR44766	FBgn0265987	314	0.63	0.0034
Rph	FBgn0030230	202	1	0.0023
Tango5	FBgn0052675	3418	-2.79	2.2e-237
Atg8a	FBgn0052672	10360	-1.64	0
BTBD9	FBgn0030228	1529	-0.07	0.045
CG15211	FBgn0030234	298	-1.78	2.2e-07
Ant2	FBgn0025111	6563	3.13	0
sesB	FBgn0003360	15570	-2.3	0
Imp	FBgn0285926	14231	0.03	0.025
lncRNA:CR45204	FBgn0266731	0
lncRNA:CR45624	FBgn0267184	2
sbr	FBgn0003321	5267	-1.59	1.5e-111
CG15210	FBgn0040850	556	-1.63	1e-15
CG15209	FBgn0030237	285	-5.67	1.4e-51
CG32669	FBgn0052669	23
Pgls	FBgn0030239	2734	-0.93	5.5e-25
CG2202	FBgn0030240	470	-1.01	1e-06
feo	FBgn0030241	6173	0.97	5.7e-48
sofe	FBgn0030242	939	0.4	0.0022
CG2186	FBgn0030243	1759	-1.55	6.6e-41
CG2157	FBgn0030244	9
CG1637	FBgn0030245	2114	-2.48	2.9e-81
Ork1	FBgn0017561	39
lncRNA:CR45616	FBgn0267176	0
lncRNA:CR45617	FBgn0267177	9
lncRNA:CR44524	FBgn0265717	3
CG1582	FBgn0030246	1739	0.23	0.0031
CG15208	FBgn0030247	973	0.71	0.001
CG43901	FBgn0264502	30
v	FBgn0003965	119	-0.89	0.012
CG2145	FBgn0030251	159	-0.73	0.019
Myo10A	FBgn0263705	32
Rab9Fa	FBgn0052671	28
Rab9Fb	FBgn0052670	222	0.06	0.081
C901	FBgn0021742	0
CG42339	FBgn0259241	23
SmydA-4	FBgn0030257	75	0.34	0.039
CG1552	FBgn0030258	1
CG1545	FBgn0030259	0
CG1537	FBgn0030260	1
lncRNA:CR45614	FBgn0267174	3
CG15203	FBgn0030261	37
sev	FBgn0003366	1248	-5.93	8.6e-191
asRNA:CR44358	FBgn0265458	382	-0.43	0.021
asRNA:CR45604	FBgn0267164	332	-3.5	1.8e-30
Vago	FBgn0030262	2113	-6.19	0
CG2076	FBgn0030263	4268	-0.37	1.5e-08
CG2061	FBgn0027498	1265	0.58	7.4e-05
CG42249	FBgn0259101	10
Hsp60A	FBgn0015245	7372	0	0.087
CG11122	FBgn0030266	3303	-0.4	2.1e-08
Rpt3	FBgn0028686	5121	-0.65	4.2e-29
SrpRalpha	FBgn0010391	4453	0.27	2.4e-06
Klp10A	FBgn0030268	5385	0.78	2.2e-29
CG44385	FBgn0265535	285	0.47	0.02
CDK2AP1	FBgn0030269	2331	-0.64	4.6e-13
asRNA:CR44054	FBgn0264863	28
ssp7	FBgn0052667	597	-2.15	1.6e-11
CG15199	FBgn0030270	17
CG15202	FBgn0030271	131	-1.61	2.1e-05
CG15201	FBgn0030272	76	-2.16	0.00033
Ran	FBgn0020255	11262	0.67	1.5e-102
Lint-1	FBgn0030274	1141	-1.22	1.2e-15
rtv	FBgn0261277	57	0.15	0.067
Dlic	FBgn0030276	5204	-1.45	2.2e-101
CG32668	FBgn0052668	5
Antdh	FBgn0026268	2
CG1394	FBgn0030277	4792	0.16	0.005
CG15200	FBgn0030278	3102	-0.05	0.056
lncRNA:CR44765	FBgn0265986	56	-0.01	0.09
CG11106	FBgn0030280	3457	0.19	0.0071
CG44422	FBgn0265595	184	-0.38	0.051
CG15198	FBgn0030283	2024	0.19	0.012
Ir10a	FBgn0083979	2
sisA	FBgn0003411	2
l(1)10Bb	FBgn0001491	3504	-0.02	0.064
Gapvd1	FBgn0030286	1090	-0.61	2.5e-06
Kap3	FBgn0028421	718	-1.19	4.2e-10
CG34348	FBgn0085377	923	-1.58	3.6e-25
GCS1	FBgn0030289	895	-0.44	0.00021
CG11756	FBgn0030290	620	0.22	0.038
CG1738	FBgn0030291	2093	0.76	5.1e-11
CG11752	FBgn0030292	7435	-0.57	8.8e-39
CG1737	FBgn0030293	4353	0.51	7.1e-15
dsh	FBgn0000499	3548	-0.23	0.00037
Pa1	FBgn0287454	3442	1.33	1.5e-42
hop	FBgn0004864	1675	-0.63	6e-10
Tim8	FBgn0027359	7833	-1.05	2.2e-138
dlg1	FBgn0001624	8952	-0.8	2.9e-65
CG15196	FBgn0030296	502	-0.57	0.0053
Gr10b	FBgn0030297	1
Gr10a	FBgn0045502	0
Or10a	FBgn0030298	0
Gs2	FBgn0001145	270	-3.86	2.1e-16
Evi5	FBgn0262740	3885	0.13	0.007
Sk1	FBgn0030300	124	-5.56	1.6e-11
HP5	FBgn0030301	3700	0.79	3.9e-16
CG43155	FBgn0262685	45
Cyp4g15	FBgn0030304	7
Uba5	FBgn0030305	2491	0.09	0.021
Spase25	FBgn0030306	5201	-0.76	3e-40
CG33235	FBgn0030307	869	-0.47	0.0026
lncRNA:CR44556	FBgn0265749	14
Drak	FBgn0052666	5383	-0.92	1.2e-37
mir-2492	FBgn0262335	0
CG1572	FBgn0030309	2378	-4.15	0
PGRP-SA	FBgn0030310	220	-2.55	1.5e-09
Polr2A	FBgn0003277	8686	-0.3	3.5e-16
asRNA:CR44266	FBgn0265252	133	-0.22	0.059
CG11699	FBgn0030311	6477	-0.46	2.7e-21
Kmn1	FBgn0027259	1322	0.16	0.014
Reepl1	FBgn0030313	1294	0.17	0.031
CG11696	FBgn0030314	1017	0.11	0.034
e(y)2	FBgn0000618	3902	-0.19	0.00031
CG11695	FBgn0030316	1449	0.78	1.5e-08
lncRNA:roX2	FBgn0019660	6744	-6.59	0
nod	FBgn0002948	580	-0.15	0.035
pkm	FBgn0030317	13
rho-4	FBgn0030318	3592	-2.7	1.6e-280
CG2533	FBgn0030319	1218	0.07	0.062
CG2247	FBgn0030320	4114	0.43	4.9e-10
CG1703	FBgn0030321	5197	0.41	1.3e-12
RPA3	FBgn0288833	5993	1.02	2.3e-62
Met	FBgn0002723	3025	-0.9	1.7e-25
Ptp10D	FBgn0004370	5540	-1.38	3.9e-100
Vlet	FBgn0030323	636	-0.77	3.8e-06
bif	FBgn0014133	3847	-2.4	6.4e-270
PhKgamma	FBgn0011754	3923	-0.7	3.3e-18
CG2444	FBgn0030326	14
FucT6	FBgn0030327	772	-0.84	1.9e-07
Amun	FBgn0030328	6947	0.46	3.1e-21
mir-9370	FBgn0283637	0
lncRNA:CR45618	FBgn0267178	25
prtp	FBgn0030329	2162	-1.3	2.6e-40
Tango10	FBgn0030330	1443	0.31	0.00082
CG15221	FBgn0030331	9
inaF-B	FBgn0259918	0
inaF-D	FBgn0260812	271	2.72	8.9e-06
inaF-A	FBgn0085351	1
inaF-C	FBgn0085350	0
m	FBgn0002577	52	-0.85	0.018
CG9360	FBgn0030332	205	-5.23	2.1e-24
dy	FBgn0004511	12
Karl	FBgn0030334	199	-0.14	0.058
asRNA:CR44962	FBgn0266277	142	3.49	2.7e-05
CkIIbeta	FBgn0000259	7758	-0.75	1.2e-40
Hsc70-3	FBgn0001218	7513	-1.3	7.5e-207
CG1578	FBgn0030336	3536	-0.96	4.4e-35
rudhira	FBgn0266019	8135	-0.91	9e-66
CG15741	FBgn0030338	0
asRNA:CR43908	FBgn0264509	2
Cyp28c1	FBgn0030339	21
CG15740	FBgn0030340	1
lncRNA:CR45619	FBgn0267179	6
p24-1	FBgn0030341	2381	-1.01	6.1e-26
CG10347	FBgn0030342	773	-0.38	0.0022
ATP7	FBgn0030343	984	-1	5.3e-10
Nrd1	FBgn0030344	2891	0.43	6.4e-08
CG1847	FBgn0030345	1019	0.09	0.04
BORCS5	FBgn0030346	951	-0.32	0.0027
CG15739	FBgn0030347	386	-3.02	4.5e-31
CG10352	FBgn0030348	40
CG10353	FBgn0030349	1647	-1.62	1.3e-42
SelG	FBgn0030350	3053	-0.98	1.4e-29
CG1840	FBgn0030351	1456	-1.2	6.3e-19
sicily	FBgn0030352	2223	-0.14	0.01
wisp	FBgn0260780	211	2.93	4.8e-07
Upf1	FBgn0030354	3368	0.33	2.6e-06
CG43156	FBgn0262686	31
pot	FBgn0250871	60	-1.47	0.0026
lncRNA:CR32661	FBgn0030356	2531	0.05	0.064
lncRNA:CR43157	FBgn0262687	2442	0.58	1e-05
Sclp	FBgn0030357	399	-4.23	1.4e-39
lncRNA:CR32660	FBgn0052660	0
CG10362	FBgn0030358	9
cac	FBgn0263111	4403	0.62	6e-10
gd	FBgn0000808	281	0.58	0.0055
tsg	FBgn0003865	0
CG18130	FBgn0030359	523	0.35	0.02
fw	FBgn0001083	82	0.42	0.048
CG1806	FBgn0030360	55	0.21	0.061
CG1492	FBgn0030361	311	-0.09	0.062
regucalcin	FBgn0030362	666	-0.93	4.3e-07
Chrac-16	FBgn0043001	1546	-1.93	1.2e-56
Lsm12a	FBgn0030364	5719	0.04	0.033
Tango4	FBgn0030365	2867	0.4	1.2e-06
Usp7	FBgn0030366	9469	0.56	2.6e-44
Cyp311a1	FBgn0030367	34
Cyp318a1	FBgn0030369	8
Ten-a	FBgn0267001	4751	-3.12	5.9e-307
lncRNA:CR43960	FBgn0264675	12
Uch-L5R	FBgn0030370	297	-0.85	0.0081
Muc11A	FBgn0052656	22
lncRNA:CR43961	FBgn0264676	1219	5.06	8.9e-32
CG34323	FBgn0085352	4386	4.13	1.8e-209
moon	FBgn0030373	1066	3.56	4.1e-28
CG15734	FBgn0030374	991	0.35	0.012
lncRNA:CR32657	FBgn0052657	2613	0.29	0.0024
lncRNA:CR32658	FBgn0040859	3760	0.35	0.00014
CG11356	FBgn0030375	1
CG2750	FBgn0030376	793	0.46	0.0061
CG1924	FBgn0030377	172	-0.04	0.084
CG32655	FBgn0052655	2148	-0.1	0.041
CG45603	FBgn0267163	1152	0.05	0.071
CG2577	FBgn0030384	338	-0.47	0.017
Ir11a	FBgn0030385	0
CG32651	FBgn0052651	1336	0.11	0.048
CG2574	FBgn0030386	797	0.42	0.0081
lncRNA:CR32652	FBgn0052652	5072	0.33	0.00011
Pkcdelta	FBgn0287828	92	-0.01	0.091
CG15927	FBgn0030389	8
lncRNA:CR45615	FBgn0267175	6
CG15731	FBgn0030390	6
Rab40	FBgn0030391	2490	-0.63	3.5e-11
CG42258	FBgn0259143	3260	0.4	3.3e-05
Cpr11A	FBgn0030394	14
Lsp1alpha	FBgn0002562	0
Mks1	FBgn0030395	44
CG2556	FBgn0030396	815	1.54	2.4e-11
snoRNA:Me18S-G894	FBgn0086047	0
hwt	FBgn0264542	646	0.03	0.082
Cpr11B	FBgn0030398	4
Pits	FBgn0030400	8392	0.09	0.0012
LIMK1	FBgn0283712	2159	-0.15	0.01
CG1824	FBgn0030403	1512	-0.24	0.003
Sec16	FBgn0052654	3009	-0.55	7.2e-11
CG1463	FBgn0030406	1252	-0.79	9.2e-09
Fpgs	FBgn0030407	209	-0.86	0.00093
asRNA:CR45621	FBgn0267181	41
CG11085	FBgn0030408	7
lncRNA:CR44568	FBgn0265761	42
CG15728	FBgn0030409	807	-1.45	3.6e-13
Aven	FBgn0030410	613	-0.34	0.0039
CG2540	FBgn0030411	459	-0.21	0.025
Tomosyn	FBgn0030412	2728	-1.61	1.5e-53
mir-970	FBgn0262187	0
CkIalpha	FBgn0015024	6246	-1.54	7e-213
Tis11	FBgn0011837	9580	-2.14	0
lncRNA:CR33963	FBgn0053963	1893	-2.35	1.1e-111
mir-9377	FBgn0283559	0
lncRNA:SMRG	FBgn0286868	0
Smr	FBgn0265523	10973	-0.51	5.6e-65
CG15725	FBgn0030417	114	-3.78	1.3e-11
lncRNA:CR43963	FBgn0264678	1038	2.52	1.8e-28
asRNA:CR45623	FBgn0267183	13
CG4004	FBgn0030418	3388	0.56	3.8e-10
lncRNA:CR44619	FBgn0265830	226	1.05	0.0018
Paics	FBgn0020513	3228	-2.07	7.4e-161
pira	FBgn0030420	371	-2.1	7.5e-18
Agpat1	FBgn0030421	1236	4.78	7.6e-42
CG32647	FBgn0052647	505	-2.75	3.5e-13
Pde9	FBgn0259171	5852	-2.89	0
Nep6	FBgn0030425	93	-1.19	0.0087
CG4661	FBgn0030429	1181	-1.36	1.1e-11
CG32650	FBgn0052650	580	0.5	0.011
Coq8	FBgn0052649	1210	-0.65	1.9e-07
CG4407	FBgn0030431	2012	0.04	0.06
CG4404	FBgn0030432	780	1.52	2.9e-11
mRpL49	FBgn0030433	5314	0.36	2.5e-10
Brms1	FBgn0030434	1722	0.46	1.3e-05
CG4645	FBgn0030435	1264	-0.56	5e-06
lncRNA:CR45625	FBgn0267185	1
lncRNA:CR45626	FBgn0267186	0
fne	FBgn0086675	13
hec	FBgn0030437	18
CG32642	FBgn0052642	0
Mur11Da	FBgn0052644	1
asRNA:CR43636	FBgn0263627	27
CG15721	FBgn0030438	4
asRNA:CR43152	FBgn0262682	758	-0.59	0.0045
CG12716	FBgn0030439	1
CG32643	FBgn0052643	727	-0.26	0.026
rad	FBgn0265597	62	-0.3	0.054
CG15719	FBgn0030440	330	-0.55	0.019
CG2209	FBgn0030441	497	-0.03	0.084
CG12715	FBgn0030443	0
asRNA:CR44840	FBgn0266114	11
mir-971	FBgn0262222	0
hep	FBgn0010303	3426	-1.02	6.2e-33
lic	FBgn0261524	2366	0.29	0.00012
CG2200	FBgn0030447	1109	-3.82	7.4e-153
Chpf	FBgn0263005	2895	0.17	0.0023
Fer3HCH	FBgn0030449	588	0.37	0.013
CG42237	FBgn0250862	132	-0.57	0.025
CG32638	FBgn0052638	817	-1.53	3e-14
sncRNA:204	FBgn0065101	0
CG15717	FBgn0030451	1679	-1.44	1.4e-34
MFS10	FBgn0030452	110	-3.44	3.7e-15
CG32645	FBgn0052645	52	0.1	0.076
CG4318	FBgn0030455	407	2.95	1.1e-13
CG4332	FBgn0030456	1682	-0.86	3.5e-15
Bap60	FBgn0025463	3320	0.11	0.0079
CG12096	FBgn0030457	1975	1.19	1.1e-17
Lgr4	FBgn0085440	80	-3.74	0.00072
CG32640	FBgn0052640	2
CG32641	FBgn0052641	1289	-2.97	2.5e-15
CG12723	FBgn0030459	5
Coq5	FBgn0030460	1312	-0.24	0.0031
sno	FBgn0265630	6979	0.26	1.3e-08
CG44437	FBgn0265629	221	-0.27	0.044
REG	FBgn0029133	8308	0.88	5.2e-87
mew	FBgn0004456	3570	-4.79	0
CG32639	FBgn0052639	191	-2.12	3.8e-05
CG15742	FBgn0030462	399	-0.07	0.072
comt	FBgn0000346	968	-0.73	1.5e-06
HDAC4	FBgn0041210	6465	-0.24	2.4e-07
CG15743	FBgn0030465	1301	-0.52	7.4e-06
CG15744	FBgn0030466	843	-0.22	0.0065
CG1764	FBgn0030467	1349	-0.32	0.00075
CG1622	FBgn0030468	2939	0.64	3.7e-12
IP3K2	FBgn0283680	2188	-6.44	1.2e-236
lncRNA:CR45018	FBgn0266376	1338	-5.21	9.1e-162
Prx2	FBgn0040309	11465	-0.53	2.8e-80
lncRNA:CR32636	FBgn0052636	80	-1.98	5.7e-05
RpS15Aa	FBgn0010198	20321	-0.61	1.9e-238
CG15747	FBgn0030474	1742	-0.29	0.00041
lncRNA:CR45708	FBgn0267272	1
lncRNA:CR45709	FBgn0267273	1
Syt12	FBgn0261085	51	0.06	0.084
dmrt11E	FBgn0030477	12
CG1640	FBgn0030478	3048	-0.98	7e-26
Rbp1-like	FBgn0030479	2616	-1.33	8e-35
Tim9a	FBgn0030480	6491	0.4	3.5e-14
Ype	FBgn0288857	2091	-2.28	2.1e-98
CG1662	FBgn0030481	1309	0.04	0.069
lncRNA:CR44620	FBgn0265831	37
lncRNA:CR44621	FBgn0265832	1
Bcat	FBgn0030482	1238	-3.92	7.5e-157
CG12725	FBgn0030483	176	-1.64	0.00059
GstT4	FBgn0030484	1511	-6.06	0
CG1998	FBgn0030485	883	-1.37	2.3e-14
Set2	FBgn0030486	1817	-0.22	0.0016
Neto	FBgn0265416	151	-0.03	0.088
CG34324	FBgn0085353	0
CG15754	FBgn0030492	3
asRNA:CR44427	FBgn0265609	19
CG44428	FBgn0265610	33
CG15756	FBgn0030493	5
Cpr12A	FBgn0030494	0
CG11816	FBgn0030495	83	-0.1	0.078
CG32631	FBgn0052631	1
CG32633	FBgn0052633	0
Tpst	FBgn0086674	1294	1.27	7.6e-16
CG46311	FBgn0284227	0
up	FBgn0004169	439	-0.85	1.9e-05
lncRNA:CR44654	FBgn0265865	7
CG11178	FBgn0030499	646	0.05	0.069
Ndc80	FBgn0030500	2157	0.61	3e-09
BthD	FBgn0030501	3737	0.54	2.7e-13
tth	FBgn0030502	4614	-1.88	3.2e-219
Tango2	FBgn0030503	1939	0.05	0.055
CG2691	FBgn0030504	3006	-0.03	0.053
NFAT	FBgn0030505	7180	-1.02	7.9e-94
DNAlig4	FBgn0030506	572	0.84	3e-05
CG11164	FBgn0030507	897	0.66	1.2e-05
CG15760	FBgn0030508	120	1.89	0.00092
CG11162	FBgn0030509	0
CG12177	FBgn0030510	414	-4.25	2.1e-60
CG11158	FBgn0030511	363	-1.48	1.5e-10
Nadsyn	FBgn0030512	3265	-1.75	2.6e-86
Nna1	FBgn0265726	1826	-0.82	2.3e-06
Mrgn1	FBgn0030514	2207	-0.15	0.0094
mus101	FBgn0002878	1356	1.35	2e-18
g	FBgn0001087	2686	-2.1	6.9e-120
Grip91	FBgn0001612	2134	0.56	5.8e-09
CG11134	FBgn0030518	2779	-0.66	6.9e-13
CG11151	FBgn0030519	3608	-2.95	0
lncRNA:CR42861	FBgn0262108	2490	-0.62	1.2e-08
Pdcd4	FBgn0030520	15265	0.61	2.5e-179
asRNA:CR43833	FBgn0264381	254	1.7	0.0032
CG32625	FBgn0052625	5698	2.4	1.1e-217
Rtc1	FBgn0020909	1865	0.37	0.00012
Yp3	FBgn0004047	565	-4.63	3.3e-86
rdgB	FBgn0003218	4083	0.56	2.8e-07
CtsB	FBgn0030521	5677	-3.06	0
amrt	FBgn0030522	850	-0.13	0.028
inaE	FBgn0261244	3953	-1.66	3.7e-111
CG10993	FBgn0030524	205	-0.14	0.064
CG10996	FBgn0030525	274	-0.21	0.053
CG11095	FBgn0030528	571	-0.36	0.0043
Clic	FBgn0030529	7802	-1.28	1.7e-171
Nup93-1	FBgn0027537	2578	0.24	0.00025
jub	FBgn0030530	1722	-0.06	0.042
AMPdeam	FBgn0052626	3601	-2	5.2e-122
mamo	FBgn0267033	5956	1.14	3.5e-43
CG11068	FBgn0030536	967	0.62	0.0018
lncRNA:CR44655	FBgn0265866	38
ben	FBgn0000173	8283	-0.44	7.5e-23
Ste12DOR	FBgn0044817	5
tRNA:Arg-TCG-2-1	FBgn0011952	0
tRNA:Ser-CGA-1-1	FBgn0011975	3
tRNA:Ser-CGA-1-2	FBgn0011976	1
tRNA:Arg-TCG-3-1	FBgn0011948	0
tRNA:Arg-TCG-3-2	FBgn0011949	0
tRNA:Arg-TCG-3-3	FBgn0011950	0
tRNA:Arg-TCG-3-4	FBgn0011951	1
tRNA:Ser-AGA-3-1	FBgn0011980	0
tRNA:Ser-AGA-2-1	FBgn0011982	9
Ste:CG33247	FBgn0053247	0
Ste:CG33246	FBgn0053246	0
Ste:CG33245	FBgn0053245	0
Ste:CG33244	FBgn0053244	0
Ste:CG33243	FBgn0053243	0
Ste:CG33242	FBgn0053242	0
Ste:CG33241	FBgn0053241	0
Ste:CG33240	FBgn0053240	0
Ste:CG33239	FBgn0053239	0
Ste:CG33238	FBgn0053238	0
Ste:CG33237	FBgn0053237	0
Ste:CG33236	FBgn0053236	3
tRNA:Ser-AGA-1-1	FBgn0011974	3
lncRNA:CR46242	FBgn0267962	0
tRNA:Ser-CGA-1-3	FBgn0011977	2
tRNA:Arg-TCG-1-1	FBgn0011953	0
tRNA:Ser-AGA-3-2	FBgn0011981	43
lncRNA:CR44657	FBgn0265868	45
tRNA:Ser-AGA-2-2	FBgn0011983	0
lncRNA:CR44658	FBgn0265869	14
CG12479	FBgn0040871	819	0.51	0.0086
CG12480	FBgn0030537	4
betaNACtes1	FBgn0030538	177	1.46	4.6e-05
CG1368	FBgn0030539	61	0.04	0.086
CG11581	FBgn0030540	0
CG11584	FBgn0030541	0
asRNA:CR45995	FBgn0267657	12
CG32603	FBgn0052603	13
CG12481	FBgn0030542	0
CG11585	FBgn0030543	2
CG13403	FBgn0030544	139	-1.27	1.6e-05
yl	FBgn0004649	329	3.46	6.7e-07
mir-4917	FBgn0263530	0
CG11590	FBgn0030545	3370	0.96	1.9e-28
Prp16	FBgn0026713	3189	0.09	0.028
l(1)G0469	FBgn0040153	2102	-0.35	9.6e-05
CG11674	FBgn0030551	39
mRpL38	FBgn0030552	3483	0.02	0.068
CG42271	FBgn0259166	1349	-1.22	4.6e-15
Fbxl4	FBgn0030555	664	-0.07	0.059
CG1434	FBgn0030554	521	0.1	0.049
mRNA-cap	FBgn0030556	2067	-0.08	0.026
asRNA:CR46473	FBgn0287604	521	-1.8	5.5e-16
CG32599	FBgn0260482	282	-5.75	9.8e-45
mud	FBgn0002873	4588	0.11	0.0042
Tat	FBgn0030558	6
CG46317	FBgn0284233	0
CG13404	FBgn0030559	2
na	FBgn0002917	78	0.94	0.013
Muc12Ea	FBgn0052602	11
CG9400	FBgn0030562	5
lncRNA:CR44963	FBgn0266278	111	-0.16	0.069
betaNACtes2	FBgn0030563	307	2.13	5.7e-10
betaNACtes6	FBgn0052598	1685	3.8	1.1e-30
dpr8	FBgn0052600	1759	4.85	9.4e-18
betaNACtes3	FBgn0052601	722	3.26	2.2e-24
betaNACtes4	FBgn0030566	444	2.41	6.5e-09
CG9411	FBgn0030569	10
CG12540	FBgn0030570	2
lncRNA:CR44110	FBgn0264941	69	-0.19	0.065
lncRNA:CR45521	FBgn0267077	38
CG14414	FBgn0030571	2013	-0.27	0.00087
mRpS25	FBgn0030572	4223	-0.23	1.5e-05
nmdyn-D6	FBgn0030573	959	1.09	2.6e-07
sbm	FBgn0030574	812	2.61	1.6e-14
NetA	FBgn0015773	125	-1.07	0.00058
CG5321	FBgn0030575	54	-2.01	0.0051
NetB	FBgn0015774	1687	3.25	8.3e-24
CG43088	FBgn0262534	3538	3.57	4.9e-112
hog	FBgn0266710	2654	2.2	5.2e-48
CG15890	FBgn0030576	51	-1.9	0.0063
CG5334	FBgn0030577	110	0.25	0.056
CG5347	FBgn0030578	151	0.9	0.019
Ag5r2	FBgn0020508	2
Ag5r	FBgn0015010	19
lncRNA:CR45522	FBgn0267078	12
rut	FBgn0003301	2015	1.15	5.2e-14
CG14408	FBgn0030581	761	-0.79	9.4e-07
CG14411	FBgn0030582	4395	0.38	3.2e-08
CG14410	FBgn0030583	28
Grx5	FBgn0030584	5097	-0.08	0.008
CG32590	FBgn0052590	1259	-0.55	4.2e-06
Flo2	FBgn0264078	3701	-2.55	9e-131
CG12539	FBgn0030586	9
CG9522	FBgn0030587	14
CG9521	FBgn0030588	8
CG9519	FBgn0030589	7
lncRNA:CR46391	FBgn0286869	17
CG46399	FBgn0286877	201	-0.13	0.068
CG9518	FBgn0030590	242	-2.51	5.2e-07
CG45064	FBgn0266434	0
CG45065	FBgn0266435	0
CG9514	FBgn0030592	79	-1.11	0.027
CG9512	FBgn0030593	35
fiz	FBgn0030594	26
CG14406	FBgn0030595	4
CG12398	FBgn0030596	30
Eo	FBgn0030597	21
CG9503	FBgn0030598	256	-5.69	1.1e-37
CG32591	FBgn0052591	1632	0.98	5.2e-05
pdgy	FBgn0027601	871	-2.66	7.9e-44
lncRNA:CR44831	FBgn0266094	85	-3.34	5.4e-07
CG9030	FBgn0030599	579	0.25	0.04
eag	FBgn0000535	361	1.67	1.8e-05
hiw	FBgn0030600	636	5.79	2.7e-11
be	FBgn0052594	2005	-4.18	4.2e-229
CG5541	FBgn0030603	1176	-5.17	4.3e-147
ND-B18	FBgn0030605	7805	-0.53	3.1e-35
opm	FBgn0264389	2360	0.09	0.022
dob	FBgn0030607	505	-1.6	1.5e-13
Lsd-2	FBgn0030608	7054	-0.92	1.1e-77
lncRNA:CR44662	FBgn0265873	108	-0.11	0.069
lncRNA:CR44661	FBgn0265872	33
CG33177	FBgn0053177	6
asRNA:CR44960	FBgn0266275	53	-0.19	0.056
CG33178	FBgn0053178	43
Cox17	FBgn0030610	4525	0.77	7.1e-24
CG15027	FBgn0030611	4549	0.28	4.1e-06
Dbct	FBgn0030612	690	-1.11	9.7e-10
Rab3-GEF	FBgn0030613	1067	2.93	2.3e-10
CG9072	FBgn0030614	1034	0.4	0.0054
Cyp4s3	FBgn0030615	3
drd	FBgn0260006	64	-1.29	0.0058
RpL37a	FBgn0030616	22061	-1.08	0
CG9095	FBgn0030617	89	0.14	0.069
CG43737	FBgn0263994	29
CG32588	FBgn0052588	787	0.19	0.041
CG5662	FBgn0030620	633	0.24	0.034
CG43075	FBgn0262485	792	0.06	0.075
CG43076	FBgn0262486	870	-0.31	0.017
lncRNA:CR44430	FBgn0265612	32
CG9101	FBgn0030622	620	0.52	0.0073
PPYR1	FBgn0030623	471	-1.47	2.8e-05
CG9106	FBgn0030624	891	-0.04	0.08
lncRNA:CR44663	FBgn0265874	1
lncRNA:CR44664	FBgn0265875	1
CG5877	FBgn0030625	1918	0.15	0.015
asRNA:CR44429	FBgn0265611	97	-4.6	1.6e-14
gce	FBgn0261703	1842	-6.14	4.4e-176
asRNA:CR44961	FBgn0266276	27
Top1	FBgn0004924	8262	-0.56	1.1e-38
mir-4957	FBgn0263548	2
dah	FBgn0015926	829	0.36	0.0025
CG9114	FBgn0030628	997	-0.62	1.1e-06
HDAC6	FBgn0026428	2262	-0.46	2.1e-06
asRNA:CR44998	FBgn0266349	11
CG9123	FBgn0030629	1031	0.57	5.6e-05
CG12608	FBgn0030630	2868	1.14	4e-31
Prp5	FBgn0030631	2150	0.46	6.9e-07
acj6	FBgn0000028	523	1.14	0.00066
Pp1-13C	FBgn0003132	1090	0.45	0.0024
CG9164	FBgn0030634	484	-5.57	2.9e-77
Cngl	FBgn0263257	23
Scamp	FBgn0040285	3335	-1.67	1.6e-116
Ahcy	FBgn0014455	4757	-0.42	8.3e-13
CG11655	FBgn0030638	572	-2.89	2.8e-40
shtd	FBgn0004391	1533	0.09	0.032
CG6294	FBgn0030640	24
CG6299	FBgn0030641	40
CG15642	FBgn0030642	276	0.31	0.02
CG15641	FBgn0030643	124	0.25	0.052
Grip128	FBgn0026433	780	0.25	0.0084
Alg14	FBgn0030645	1491	-0.51	4.1e-06
mh	FBgn0267977	2879	0.49	1.5e-07
CG6324	FBgn0030647	3915	4.24	1.4e-212
CG6340	FBgn0030648	5655	0.51	6e-15
Gmap	FBgn0027287	6309	-6.29	0
lncRNA:CR44888	FBgn0266182	15
mir-283	FBgn0262426	16
mir-304	FBgn0262409	0
mir-12	FBgn0262395	0
Ac13E	FBgn0022710	1233	-0.9	8.6e-08
lncRNA:CR44353	FBgn0265453	14
lncRNA:CR44354	FBgn0265454	0
CG42300	FBgn0259196	2653	3.48	9.9e-72
CG7860	FBgn0030653	1101	-2.63	1.9e-55
CG15643	FBgn0030654	168	-0.08	0.07
CG9213	FBgn0030655	1051	0.21	0.011
CG42299	FBgn0259195	947	3.03	4e-20
cerv	FBgn0030657	1167	-0.47	5.6e-05
CG7872	FBgn0030658	2387	-1.4	2.5e-47
CG9215	FBgn0030659	1549	-0.07	0.045
CG8097	FBgn0030660	5333	3.29	9.6e-217
Chsy	FBgn0030662	906	-5.03	2.4e-139
Alp11	FBgn0030661	467	-0.01	0.09
sog	FBgn0003463	430	-1.75	2.2e-13
lncRNA:CR44423	FBgn0265596	3
lncRNA:CR44893	FBgn0266198	4
CG8117	FBgn0030663	69	-0.82	0.028
asRNA:CR43299	FBgn0262991	678	2.01	1.9e-06
CG8119	FBgn0030664	619	4.61	4.3e-14
CG15646	FBgn0030665	81	1.23	0.007
CG12708	FBgn0030666	95	1.12	0.012
CG15599	FBgn0030667	5593	2.93	4.1e-222
lncRNA:CR43132	FBgn0262606	3770	3.09	3.8e-102
lncRNA:CR45523	FBgn0267079	256	3.82	6.7e-06
lncRNA:CR45524	FBgn0267080	9
lncRNA:CR45526	FBgn0267082	39
CG8128	FBgn0030668	790	-0.57	0.00018
CG9240	FBgn0030669	3174	-0.97	4.3e-31
Pis	FBgn0030670	1968	-1.31	2.8e-33
CG8134	FBgn0030671	1108	-0.63	1.9e-06
CG9281	FBgn0030672	7224	-0.16	1e-05
CG15601	FBgn0030673	1622	0.47	0.00016
HUWE1	FBgn0030674	8793	1.31	2.1e-160
CG8191	FBgn0030675	622	0.14	0.035
CG12379	FBgn0030676	1779	-0.11	0.021
MagR	FBgn0026666	3334	-0.12	0.0094
Arp6	FBgn0011741	2487	-0.97	1.1e-26
CG11679	FBgn0030678	1526	-0.28	0.0012
CG8206	FBgn0030679	1956	-0.71	3.3e-10
CG8944	FBgn0030680	1302	0.76	6.6e-09
CCT6	FBgn0027329	6872	-0.2	3.2e-07
Mvd	FBgn0030683	801	-0.04	0.072
Graf	FBgn0030685	3734	-1.46	4.3e-82
CG8260	FBgn0030684	185	0.75	0.017
mRpL3	FBgn0030686	3417	-0.48	6.6e-11
Polr3A	FBgn0030687	868	0.13	0.027
CG8952	FBgn0030688	27
CG33172	FBgn0053172	479	0.1	0.051
CG43672	FBgn0263747	71	0.5	0.024
CG43673	FBgn0263748	15
Efhc1.1	FBgn0030691	738	-0.1	0.058
Paf-AHalpha	FBgn0025809	4084	-0.31	1.2e-06
mRpS30	FBgn0030692	3050	-0.32	6.4e-06
Rhp	FBgn0026374	718	3.01	2.6e-14
sordd1	FBgn0030693	3122	-1.46	2.7e-62
sordd2	FBgn0052581	1371	-1.46	1.4e-25
CG15602	FBgn0030694	1836	-0.09	0.03
PGRP-LE	FBgn0030695	2016	-0.49	1.4e-06
sd	FBgn0003345	8459	-1.21	2.1e-175
lncRNA:CR44384	FBgn0265534	371	-2.77	4e-17
CG8509	FBgn0030696	340	-1.39	3.5e-05
Chc	FBgn0000319	6415	-1.64	4.9e-253
lncRNA:CR32582	FBgn0052582	661	0.72	0.0011
CG8565	FBgn0030697	2561	0.16	0.022
ArgRS	FBgn0027093	2905	0.44	4.8e-08
CG8578	FBgn0030699	1723	-0.85	3.9e-09
sun	FBgn0014391	13211	-1.41	0
UBL3	FBgn0026076	4375	-1.09	2.4e-43
CG15914	FBgn0030700	625	-0.04	0.071
Myb	FBgn0002914	189	-0.39	0.018
CG46440	FBgn0287210	0
AlkB	FBgn0065035	954	-1.32	4.4e-17
Gbeta13F	FBgn0001105	11819	-0.63	2.2e-77
Gapdh2	FBgn0001092	6042	-1.33	1.2e-149
CG16952	FBgn0030701	2084	-0.63	1e-10
tay	FBgn0260938	5505	-0.56	5.5e-17
MSBP	FBgn0030703	3697	-0.71	1.5e-21
CG15916	FBgn0030704	1547	-0.11	0.026
shi	FBgn0003392	7068	-0.89	8.2e-46
CycD	FBgn0010315	2137	-0.81	5.9e-17
Lrp4	FBgn0030706	133	0.94	0.015
CG8916	FBgn0030707	8
Lcch3	FBgn0010240	43
asRNA:CR45000	FBgn0266351	169	-0.59	0.0082
Ranbp16	FBgn0053180	3260	-0.21	0.00071
Stim	FBgn0045073	3710	-2.2	1e-192
CG8924	FBgn0030710	2247	-0.31	0.00016
Rrp47	FBgn0030711	4129	-0.67	3e-23
mmd	FBgn0259110	893	-0.54	0.028
mir-927	FBgn0262210	0
lncRNA:CR45527	FBgn0267083	8
Or13a	FBgn0030715	8
CG42766	FBgn0261834	484	-0.03	0.084
CG9170	FBgn0030716	532	0.38	0.0078
Slc25A46a	FBgn0030717	926	-0.49	0.00016
ND-20	FBgn0030718	6510	-1.01	2.1e-87
eIF5	FBgn0030719	1930	-0.33	0.0013
CG46312	FBgn0284228	0
exd	FBgn0000611	6100	0.19	4.7e-05
CG8939	FBgn0030720	2994	0.63	2.5e-14
vap	FBgn0003969	2658	-0.7	3.8e-14
CG12698	FBgn0030721	678	0.09	0.066
Muc14A	FBgn0052580	679	1.87	3e-10
CG12395	FBgn0030722	530	1.47	2.1e-05
dpr18	FBgn0030723	560	3.61	1.7e-12
Nipsnap	FBgn0030724	2743	-1.45	7.5e-61
Tob	FBgn0028397	3347	-1.87	7.6e-58
mir-4958	FBgn0263516	0
CG8958	FBgn0030725	464	0.39	0.019
CG42353	FBgn0259699	0
CG42354	FBgn0259700	76	-2.09	1.4e-06
disco-r	FBgn0285879	400	-0.55	0.028
lncRNA:CR46211	FBgn0267930	221	0.96	0.0064
mir-985	FBgn0262283	0
disco	FBgn0000459	153	-0.21	0.052
snRNA:U5:14B	FBgn0003933	41
snRNA:U2:14B	FBgn0003920	22
CG12507	FBgn0030729	18
kat80	FBgn0040207	2419	-0.02	0.07
Mfe2	FBgn0030731	1367	-1.31	2.1e-23
Prosalpha4	FBgn0004066	7744	0.46	2.4e-25
eas	FBgn0000536	2325	0.6	1.9e-08
CG32576	FBgn0052576	1236	-1.16	2.4e-16
UQCR-14	FBgn0030733	11176	-1.31	0
caz	FBgn0285954	4957	0.27	7.9e-06
ERp44	FBgn0030734	2085	-0.78	2.3e-13
CG3632	FBgn0030735	1141	-0.89	2.2e-11
CG3679	FBgn0027521	1897	3.58	2.2e-57
Had1	FBgn0286508	296	-1.54	0.00012
asRNA:CR45485	FBgn0267041	181	3.1	4.4e-08
CG9915	FBgn0030738	2650	-0.16	0.0034
SWIP	FBgn0030739	823	0.04	0.07
Cyp1	FBgn0004432	14690	0.64	1.1e-161
CG9917	FBgn0030740	2928	-1.69	6.3e-86
CG32579	FBgn0052579	638	-0.99	5.6e-08
CalpC	FBgn0260450	414	-1.46	8.2e-12
CG9919	FBgn0030742	75	0.69	0.013
CG9921	FBgn0030743	3553	0.05	0.036
Dsp1	FBgn0278608	10947	0.32	6.9e-28
sl	FBgn0003416	1445	-0.54	3.6e-08
U2af50	FBgn0005411	4933	-0.43	2.3e-13
PIG-Q	FBgn0086448	852	-0.46	0.00019
nonA	FBgn0004227	5241	-0.02	0.061
Fur2	FBgn0004598	1828	-1.85	3.5e-73
CG9992	FBgn0030744	4270	0.14	0.0022
CG4239	FBgn0030745	710	-1.31	2.5e-17
TH1	FBgn0010416	2436	-0.14	0.0061
mei-41	FBgn0004367	1416	0.87	4.6e-10
CG9981	FBgn0030746	30
CG4301	FBgn0030747	56	0.14	0.07
Traf-like	FBgn0030748	16
AnxB11	FBgn0030749	3239	-3.23	0
hang	FBgn0026575	8510	1.64	0
CDC50	FBgn0030752	1675	-1.37	2e-34
rngo	FBgn0030753	3371	0.13	0.005
eIF2alpha	FBgn0261609	8480	0.17	4.7e-06
CG34015	FBgn0054015	2369	-0.33	7.5e-05
eIF4H1	FBgn0262734	9659	0.36	2.5e-22
para	FBgn0285944	812	5.04	4.9e-07
Cnx14D	FBgn0264077	426	-0.56	0.0087
CG9903	FBgn0030756	3
CG9902	FBgn0030757	824	1.73	8.4e-14
Arp2	FBgn0011742	4121	-0.57	2.1e-13
Pp2B-14D	FBgn0011826	4298	-0.25	1.6e-05
CanA-14F	FBgn0267912	3228	-1.15	1.1e-32
CG13014	FBgn0030759	1593	-0.63	3.2e-08
SMC3	FBgn0015615	2520	1.4	1.7e-35
Ubc7	FBgn0267384	2800	0.09	0.017
CG9784	FBgn0030761	1590	0.24	0.0062
Nup153	FBgn0061200	7680	0.87	7.2e-83
mir-4965	FBgn0263538	1
mbt	FBgn0025743	5415	-0.32	3e-10
sisRNA:2	FBgn0286040	3
CG9782	FBgn0030763	23
Rok	FBgn0026181	6654	-1.15	2.5e-140
CG9777	FBgn0030764	688	-1.19	1.5e-07
asRNA:CR45001	FBgn0266352	6
sbRNA:1	FBgn0286878	1
RpS19a	FBgn0010412	20183	-0.44	7e-125
SNRPG	FBgn0261791	12318	1.59	0
mthl1	FBgn0030766	3118	-2.36	3e-231
lncRNA:CR46147	FBgn0267826	10
CG42512	FBgn0260238	27
CG32573	FBgn0052573	0
Nemp	FBgn0030768	1268	-0.69	9.5e-07
r	FBgn0003189	2461	-2.46	2.7e-154
CG15865	FBgn0015336	8
CG13012	FBgn0030769	133	-1.08	0.0034
CG13010	FBgn0030770	1079	0.39	0.007
sing	FBgn0261245	54	-0.69	0.012
Axs	FBgn0000152	816	-1.66	4.1e-23
Septin4	FBgn0259923	4438	2.34	1.8e-70
CG4678	FBgn0030778	60	1.69	0.012
CG9676	FBgn0030773	1
sphe	FBgn0030774	2
CG9673	FBgn0030775	1
CG4653	FBgn0030776	1
CG9672	FBgn0030777	13
CG13008	FBgn0030780	925	0.08	0.068
CG34325	FBgn0085354	1159	-1.84	6.4e-29
CG32572	FBgn0052572	672	-0.4	0.012
goe	FBgn0027528	2533	-2.47	1.3e-119
TwdlX	FBgn0052571	4
TwdlY	FBgn0052570	7
TwdlZ	FBgn0052569	4
CG32568	FBgn0052568	932	-0.4	0.0092
Twdlalpha	FBgn0052574	328	0.25	0.047
if	FBgn0001250	741	-4.74	3.5e-55
mRpL22	FBgn0030786	4814	-0.57	1.2e-22
CG9609	FBgn0030787	2281	-0.05	0.046
Sap30	FBgn0030788	1856	-0.26	0.00075
Rrp45	FBgn0030789	1365	0.41	0.00017
CG4768	FBgn0030790	4156	-0.09	0.0086
CG9132	FBgn0030791	3200	-1.4	3.9e-57
CG4789	FBgn0030792	3721	-0.83	3.4e-31
Rai1	FBgn0030793	2335	0.78	3.2e-12
CG13005	FBgn0030794	426	0.81	0.00017
asRNA:CR44053	FBgn0264862	125	1.92	0.00033
ppk28	FBgn0030795	98	-1.28	0.00043
CG4829	FBgn0030796	960	-4.53	1.7e-79
lncRNA:CR44129	FBgn0264960	7
CG46306	FBgn0284222	0
CG13004	FBgn0030797	4
RSG7	FBgn0024941	45
CG13003	FBgn0030798	12
CG4872	FBgn0030799	195	0.05	0.08
Nprl2	FBgn0030800	805	0.03	0.078
Polr3I	FBgn0030801	1286	-0.22	0.0061
DENR	FBgn0030802	4852	0.17	0.00021
CG4880	FBgn0030803	1270	-0.83	3.6e-09
lncRNA:CR43768	FBgn0264268	23
CG13002	FBgn0030804	0
CG33252	FBgn0053252	394	-0.23	0.044
lncRNA:CR44754	FBgn0265967	55	-2.92	3.1e-05
CG4928	FBgn0027556	5997	-6.24	0
wus	FBgn0030805	634	-2.74	3.6e-46
CG13001	FBgn0030806	1230	-0.59	6e-07
[truncated: 15,560 more rows]
