# Supplementary material for: Cell-type- and chromosome-specific chromatin landscapes and DNA replication programs of Drosophila testis tumor stem cell–like cells
Source: Genome Res. 2026 Jan;36(1):83–101. doi: 10.1101/gr.280809.125 (PMC12758400; doi:10.1101/gr.280809.125)
Supplement: Supplement 3 [file Supplemental_Table_S3.xlsx]

## Sheet: Legend
GO Term Enrichment Analysis
	GO cellular component complete	Description of term (GO:ID)
	Drosophila melanogaster	Number of analytes in the reference set
	upload_1	Number of analytes that are DEGs
	upload_1 (expected)	Predicted # DEGs (null model)
	upload_1 (over/under)	Comparison of actual vs expected
	upload_1 (fold Enrichment)	Log2 transform of actual vs expected
	raw P-value	Exact test result of actual vs expected
	FDR	FDR-corrected P-value

## Sheet: Top 500 GSC
Analysis Type:	PANTHER Overrepresentation Test (Released 20240226)
Annotation Version and Release Date:	GO Ontology database DOI: 10.5281/zenodo.10536401 Released 2024-01-17
Analyzed List:	upload_1 (Drosophila melanogaster)
Reference List:	Drosophila melanogaster (all genes in database)
Test Type:	FISHER
Correction:	FDR
GO cellular component complete	Drosophila melanogaster - REFLIST (13821)	upload_1 (493)	upload_1 (expected)	upload_1 (over/under)	upload_1 (fold Enrichment)	upload_1 (raw P-value)	upload_1 (FDR)
SUMO activating enzyme complex (GO:0031510)	2	2	0.07	+	28.03	1.27E-03	1.16E-02
box H/ACA snoRNP complex (GO:0031429)	4	4	0.14	+	28.03	1.60E-06	2.30E-05
box H/ACA RNP complex (GO:0072588)	4	4	0.14	+	28.03	1.60E-06	2.27E-05
proton-transporting ATP synthase, central stalk (GO:0045269)	4	4	0.14	+	28.03	1.60E-06	2.25E-05
FACT complex (GO:0035101)	2	2	0.07	+	28.03	1.27E-03	1.16E-02
mitochondrial proton-transporting ATP synthase, central stalk (GO:0005756)	4	4	0.14	+	28.03	1.60E-06	2.22E-05
cytosolic large ribosomal subunit (GO:0022625)	56	53	2	+	26.53	2.87E-74	2.85E-72
cytosolic ribosome (GO:0022626)	100	90	3.57	+	25.23	1.52E-121	1.96E-118
proton-transporting ATP synthase complex, catalytic core F(1) (GO:0045261)	8	7	0.29	+	24.53	5.47E-10	1.05E-08
mitochondrial proton-transporting ATP synthase complex, catalytic sector F(1) (GO:0000275)	7	6	0.25	+	24.03	1.36E-08	2.40E-07
cytosolic small ribosomal subunit (GO:0022627)	44	37	1.57	+	23.57	2.18E-47	1.56E-45
U4 snRNP (GO:0005687)	6	5	0.21	+	23.36	3.30E-07	5.13E-06
pICln-Sm protein complex (GO:0034715)	6	5	0.21	+	23.36	3.30E-07	5.07E-06
eukaryotic translation elongation factor 1 complex (GO:0005853)	5	4	0.18	+	22.43	7.77E-06	9.57E-05
proton-transporting ATP synthase, catalytic core (GO:0045267)	3	2	0.11	+	18.69	3.72E-03	3.18E-02
proton-transporting ATP synthase complex (GO:0045259)	24	16	0.86	+	18.69	3.06E-18	9.19E-17
mitochondrial proton-transporting ATP synthase, catalytic core (GO:0005754)	3	2	0.11	+	18.69	3.72E-03	3.16E-02
mitochondrial proton-transporting ATP synthase complex (GO:0005753)	24	16	0.86	+	18.69	3.06E-18	8.98E-17
mitochondrial proton-transporting ATP synthase complex, coupling factor F(o) (GO:0000276)	14	9	0.5	+	18.02	1.49E-10	2.95E-09
proton-transporting ATP synthase complex, coupling factor F(o) (GO:0045263)	14	9	0.5	+	18.02	1.49E-10	2.91E-09
mitochondrial respiratory chain complex IV (GO:0005751)	19	12	0.68	+	17.71	1.49E-13	3.64E-12
mitochondrial proton-transporting ATP synthase, stator stalk (GO:0000274)	5	3	0.18	+	16.82	4.28E-04	4.38E-03
eukaryotic 43S preinitiation complex (GO:0016282)	5	3	0.18	+	16.82	4.28E-04	4.35E-03
respiratory chain complex IV (GO:0045277)	20	12	0.71	+	16.82	3.61E-13	8.49E-12
proton-transporting ATP synthase, stator stalk (GO:0045265)	5	3	0.18	+	16.82	4.28E-04	4.32E-03
cytochrome complex (GO:0070069)	33	18	1.18	+	15.29	4.07E-18	1.17E-16
large ribosomal subunit (GO:0015934)	106	56	3.78	+	14.81	4.00E-53	3.69E-51
ribosomal subunit (GO:0044391)	178	92	6.35	+	14.49	1.67E-86	2.69E-84
ribosome (GO:0005840)	183	93	6.53	+	14.25	1.48E-86	2.74E-84
box C/D RNP complex (GO:0031428)	6	3	0.21	+	14.02	8.32E-04	8.03E-03
translation preinitiation complex (GO:0070993)	6	3	0.21	+	14.02	8.32E-04	7.97E-03
nuclear matrix (GO:0016363)	6	3	0.21	+	14.02	8.32E-04	7.91E-03
small ribosomal subunit (GO:0015935)	75	37	2.68	+	13.83	7.10E-34	4.17E-32
U1 snRNP (GO:0005685)	15	7	0.54	+	13.08	3.53E-07	5.37E-06
U5 snRNP (GO:0005682)	13	6	0.46	+	12.94	2.77E-06	3.58E-05
respiratory chain complex III (GO:0045275)	13	6	0.46	+	12.94	2.77E-06	3.54E-05
mitochondrial respiratory chain complex III (GO:0005750)	13	6	0.46	+	12.94	2.77E-06	3.51E-05
proton-transporting two-sector ATPase complex, catalytic domain (GO:0033178)	19	8	0.68	+	11.8	1.32E-07	2.11E-06
eukaryotic translation initiation factor 4F complex (GO:0016281)	12	5	0.43	+	11.68	3.64E-05	4.16E-04
ISWI-type complex (GO:0031010)	12	5	0.43	+	11.68	3.64E-05	4.13E-04
U2 snRNP (GO:0005686)	20	8	0.71	+	11.21	2.14E-07	3.37E-06
mitochondrial respirasome (GO:0005746)	89	35	3.17	+	11.02	7.62E-28	2.98E-26
respiratory chain complex (GO:0098803)	90	35	3.21	+	10.9	1.21E-27	4.58E-26
respirasome (GO:0070469)	90	35	3.21	+	10.9	1.21E-27	4.45E-26
proteasome core complex, beta-subunit complex (GO:0019774)	13	5	0.46	+	10.78	5.74E-05	6.29E-04
sno(s)RNA-containing ribonucleoprotein complex (GO:0005732)	19	7	0.68	+	10.33	2.44E-06	3.25E-05
polytene chromosome chromocenter (GO:0005701)	11	4	0.39	+	10.19	4.32E-04	4.33E-03
proteasome core complex, alpha-subunit complex (GO:0019773)	11	4	0.39	+	10.19	4.32E-04	4.29E-03
proteasome core complex (GO:0005839)	25	9	0.89	+	10.09	1.07E-07	1.72E-06
inner mitochondrial membrane protein complex (GO:0098800)	155	52	5.53	+	9.41	7.87E-37	4.84E-35
U12-type spliceosomal complex (GO:0005689)	12	4	0.43	+	9.34	6.30E-04	6.17E-03
CCR4-NOT core complex (GO:0030015)	9	3	0.32	+	9.34	3.23E-03	2.84E-02
respiratory chain complex I (GO:0045271)	51	17	1.82	+	9.34	8.98E-13	2.07E-11
nascent polypeptide-associated complex (GO:0005854)	9	3	0.32	+	9.34	3.23E-03	2.82E-02
NADH dehydrogenase complex (GO:0030964)	51	17	1.82	+	9.34	8.98E-13	2.04E-11
mitochondrial respiratory chain complex I (GO:0005747)	51	17	1.82	+	9.34	8.98E-13	2.00E-11
proton-transporting two-sector ATPase complex, proton-transporting domain (GO:0033177)	32	10	1.14	+	8.76	9.69E-08	1.58E-06
RNA cap binding complex (GO:0034518)	16	5	0.57	+	8.76	1.78E-04	1.87E-03
RISC complex (GO:0016442)	13	4	0.46	+	8.63	8.85E-04	8.34E-03
RNAi effector complex (GO:0031332)	13	4	0.46	+	8.63	8.85E-04	8.28E-03
proton-transporting two-sector ATPase complex (GO:0016469)	59	18	2.1	+	8.55	1.07E-12	2.35E-11
spliceosomal tri-snRNP complex (GO:0097526)	23	7	0.82	+	8.53	1.05E-05	1.27E-04
chromocenter (GO:0010369)	23	7	0.82	+	8.53	1.05E-05	1.26E-04
polytene chromosome puff (GO:0005703)	44	13	1.57	+	8.28	2.44E-09	4.50E-08
nucleosome (GO:0000786)	17	5	0.61	+	8.25	2.45E-04	2.56E-03
cytoplasmic stress granule (GO:0010494)	17	5	0.61	+	8.25	2.45E-04	2.53E-03
pole plasm (GO:0045495)	55	16	1.96	+	8.16	4.45E-11	9.26E-10
neuronal ribonucleoprotein granule (GO:0071598)	14	4	0.5	+	8.01	1.20E-03	1.12E-02
germ plasm (GO:0060293)	46	13	1.64	+	7.92	4.48E-09	8.04E-08
P granule (GO:0043186)	44	12	1.57	+	7.65	2.77E-08	4.64E-07
SMN-Sm protein complex (GO:0034719)	11	3	0.39	+	7.65	6.01E-03	4.98E-02
rough endoplasmic reticulum membrane (GO:0030867)	11	3	0.39	+	7.65	6.01E-03	4.94E-02
nuclear speck (GO:0016607)	34	9	1.21	+	7.42	2.06E-06	2.77E-05
messenger ribonucleoprotein complex (GO:1990124)	19	5	0.68	+	7.38	4.34E-04	4.28E-03
ribonucleoprotein complex (GO:1990904)	556	142	19.83	+	7.16	1.02E-84	1.32E-82
cytoplasmic ribonucleoprotein granule (GO:0036464)	103	26	3.67	+	7.08	1.58E-15	4.16E-14
eukaryotic translation initiation factor 3 complex (GO:0005852)	16	4	0.57	+	7.01	2.07E-03	1.84E-02
brahma complex (GO:0035060)	16	4	0.57	+	7.01	2.07E-03	1.83E-02
ATPase complex (GO:1904949)	116	28	4.14	+	6.77	4.46E-16	1.23E-14
ribonucleoprotein granule (GO:0035770)	108	26	3.85	+	6.75	5.46E-15	1.41E-13
oxidoreductase complex (GO:1990204)	96	23	3.42	+	6.72	2.32E-13	5.55E-12
heterochromatin (GO:0000792)	59	14	2.1	+	6.65	1.37E-08	2.39E-07
mitochondrial inner membrane (GO:0005743)	228	54	8.13	+	6.64	1.38E-29	6.88E-28
P-body (GO:0000932)	39	9	1.39	+	6.47	7.09E-06	8.80E-05
organelle inner membrane (GO:0019866)	236	54	8.42	+	6.41	8.87E-29	3.82E-27
small-subunit processome (GO:0032040)	44	10	1.57	+	6.37	2.53E-06	3.34E-05
neuron projection cytoplasm (GO:0120111)	18	4	0.64	+	6.23	3.29E-03	2.85E-02
proteasome complex (GO:0000502)	55	12	1.96	+	6.12	4.03E-07	6.05E-06
nuclear membrane (GO:0031965)	37	8	1.32	+	6.06	3.84E-05	4.31E-04
polytene chromosome (GO:0005700)	188	40	6.71	+	5.96	2.63E-20	8.27E-19
U4/U6 x U5 tri-snRNP complex (GO:0046540)	19	4	0.68	+	5.9	4.05E-03	3.37E-02
mitochondrial protein-containing complex (GO:0098798)	273	57	9.74	+	5.85	3.99E-28	1.61E-26
euchromatin (GO:0000791)	58	12	2.07	+	5.8	7.42E-07	1.10E-05
mitochondrial membrane (GO:0031966)	300	60	10.7	+	5.61	1.67E-28	6.96E-27
spliceosomal snRNP complex (GO:0097525)	50	10	1.78	+	5.61	8.66E-06	1.06E-04
endopeptidase complex (GO:1905369)	60	12	2.14	+	5.61	1.09E-06	1.59E-05
SWI/SNF superfamily-type complex (GO:0070603)	52	10	1.85	+	5.39	1.25E-05	1.48E-04
cytosol (GO:0005829)	998	191	35.6	+	5.37	3.64E-93	1.17E-90
catalytic step 2 spliceosome (GO:0071013)	124	23	4.42	+	5.2	6.60E-11	1.35E-09
mitochondrial envelope (GO:0005740)	330	60	11.77	+	5.1	3.61E-26	1.29E-24
nuclear body (GO:0016604)	74	13	2.64	+	4.92	1.85E-06	2.51E-05
small nuclear ribonucleoprotein complex (GO:0030532)	59	10	2.1	+	4.75	3.97E-05	4.42E-04
envelope (GO:0031975)	457	77	16.3	+	4.72	3.37E-31	1.82E-29
organelle envelope (GO:0031967)	457	77	16.3	+	4.72	3.37E-31	1.74E-29
precatalytic spliceosome (GO:0071011)	141	23	5.03	+	4.57	9.52E-10	1.81E-08
polytene chromosome interband (GO:0005705)	43	7	1.53	+	4.56	7.44E-04	7.23E-03
nuclear chromosome (GO:0000228)	124	20	4.42	+	4.52	1.46E-08	2.51E-07
peptidase complex (GO:1905368)	94	14	3.35	+	4.18	5.71E-06	7.16E-05
preribosome (GO:0030684)	81	12	2.89	+	4.15	2.80E-05	3.23E-04
nucleoplasm (GO:0005654)	499	73	17.8	+	4.1	1.33E-25	4.42E-24
nucleolus (GO:0005730)	241	35	8.6	+	4.07	1.24E-12	2.66E-11
Sm-like protein family complex (GO:0120114)	69	10	2.46	+	4.06	1.56E-04	1.66E-03
transmembrane transporter complex (GO:1902495)	164	23	5.85	+	3.93	1.90E-08	3.22E-07
spliceosomal complex (GO:0005681)	187	26	6.67	+	3.9	2.69E-09	4.89E-08
chromatin (GO:0000785)	359	49	12.81	+	3.83	3.91E-16	1.10E-14
nuclear envelope (GO:0005635)	127	17	4.53	+	3.75	2.64E-06	3.45E-05
nuclear lumen (GO:0031981)	794	106	28.32	+	3.74	7.51E-34	4.22E-32
intracellular non-membrane-bounded organelle (GO:0043232)	1658	217	59.14	+	3.67	2.53E-74	2.97E-72
non-membrane-bounded organelle (GO:0043228)	1658	217	59.14	+	3.67	2.53E-74	2.72E-72
chromosome (GO:0005694)	641	83	22.86	+	3.63	2.17E-25	6.99E-24
transporter complex (GO:1990351)	178	23	6.35	+	3.62	8.96E-08	1.48E-06
protein-DNA complex (GO:0032993)	390	49	13.91	+	3.52	1.09E-14	2.77E-13
organelle outer membrane (GO:0031968)	56	7	2	+	3.5	3.60E-03	3.10E-02
outer membrane (GO:0019867)	57	7	2.03	+	3.44	3.98E-03	3.34E-02
membrane protein complex (GO:0098796)	550	67	19.62	+	3.42	4.46E-19	1.37E-17
perinuclear region of cytoplasm (GO:0048471)	76	9	2.71	+	3.32	1.48E-03	1.34E-02
catalytic complex (GO:1902494)	1182	139	42.16	+	3.3	7.70E-39	4.98E-37
chromosomal region (GO:0098687)	179	21	6.38	+	3.29	1.64E-06	2.25E-05
protein-containing complex (GO:0032991)	2900	332	103.44	+	3.21	1.16E-113	7.49E-111
intracellular organelle lumen (GO:0070013)	996	112	35.53	+	3.15	5.39E-29	2.58E-27
organelle lumen (GO:0043233)	997	112	35.56	+	3.15	5.89E-29	2.72E-27
membrane-enclosed lumen (GO:0031974)	997	112	35.56	+	3.15	5.89E-29	2.62E-27
supramolecular complex (GO:0099080)	352	38	12.56	+	3.03	1.08E-09	2.03E-08
organelle membrane (GO:0031090)	845	80	30.14	+	2.65	4.76E-16	1.28E-14
nuclear protein-containing complex (GO:0140513)	797	73	28.43	+	2.57	6.11E-14	1.52E-12
nucleus (GO:0005634)	2833	246	101.05	+	2.43	1.18E-49	8.97E-48
mitochondrion (GO:0005739)	893	74	31.85	+	2.32	7.80E-12	1.65E-10
cytoplasm (GO:0005737)	4579	373	163.33	+	2.28	2.21E-86	3.17E-84
intracellular organelle (GO:0043229)	5520	411	196.9	+	2.09	1.02E-90	2.64E-88
organelle (GO:0043226)	5640	412	201.18	+	2.05	7.05E-88	1.52E-85
intracellular protein-containing complex (GO:0140535)	612	43	21.83	+	1.97	2.69E-05	3.15E-04
intracellular anatomical structure (GO:0005622)	6634	462	236.64	+	1.95	6.77E-111	2.91E-108
intracellular membrane-bounded organelle (GO:0043231)	4894	334	174.57	+	1.91	8.87E-50	7.16E-48
membrane-bounded organelle (GO:0043227)	5088	335	181.49	+	1.85	4.35E-46	2.96E-44
cellular anatomical entity (GO:0110165)	9272	465	330.74	+	1.41	2.45E-50	2.11E-48
cellular_component (GO:0005575)	11049	473	394.12	+	1.2	1.17E-25	3.96E-24
cell periphery (GO:0071944)	1778	43	63.42	-	0.68	3.98E-03	3.36E-02
Golgi apparatus (GO:0005794)	373	3	13.31	-	0.23	1.53E-03	1.37E-02
Unclassified (UNCLASSIFIED)	2772	20	98.88	-	0.2	1.17E-25	4.07E-24
extracellular space (GO:0005615)	723	5	25.79	-	0.19	7.91E-07	1.16E-05
intracellular vesicle (GO:0097708)	445	3	15.87	-	0.19	1.30E-04	1.40E-03
cytoplasmic vesicle (GO:0031410)	445	3	15.87	-	0.19	1.30E-04	1.39E-03
vesicle (GO:0031982)	483	3	17.23	-	0.17	4.60E-05	5.08E-04
extracellular region (GO:0005576)	1060	6	37.81	-	0.16	6.91E-11	1.39E-09
endosome (GO:0005768)	270	1	9.63	-	0.1	1.25E-03	1.16E-02
external encapsulating structure (GO:0030312)	305	0	10.88	-	< 0.01	2.70E-05	3.14E-04
extracellular matrix (GO:0031012)	270	0	9.63	-	< 0.01	8.75E-05	9.50E-04

## Sheet: Top 500 CySC
Analysis Type:	PANTHER Overrepresentation Test (Released 20240226)
Annotation Version and Release Date:	GO Ontology database DOI: 10.5281/zenodo.10536401 Released 2024-01-17
Analyzed List:	upload_1 (Drosophila melanogaster)
Reference List:	Drosophila melanogaster (all genes in database)
Test Type:	FISHER
Correction:	FDR
GO cellular component complete	Drosophila melanogaster - REFLIST (13821)	upload_1 (487)	upload_1 (expected)	upload_1 (over/under)	upload_1 (fold Enrichment)	upload_1 (raw P-value)	upload_1 (FDR)
intracellular ferritin complex (GO:0008043)	2	2	0.07	+	28.38	0.00124	0.0146
ferritin complex (GO:0070288)	2	2	0.07	+	28.38	0.00124	0.0144
cytosolic large ribosomal subunit (GO:0022625)	56	51	1.97	+	25.85	1.87e-69	4.83e-67
cytosolic ribosome (GO:0022626)	100	85	3.52	+	24.12	2.71e-110	3.5e-107
eukaryotic translation elongation factor 1 complex (GO:0005853)	5	4	0.18	+	22.7	7.4e-06	0.000126
cytosolic small ribosomal subunit (GO:0022627)	44	34	1.55	+	21.93	2.27e-41	1.96e-39
box H/ACA snoRNP complex (GO:0031429)	4	3	0.14	+	21.28	0.000169	0.00252
box H/ACA RNP complex (GO:0072588)	4	3	0.14	+	21.28	0.000169	0.00249
proton-transporting ATP synthase, central stalk (GO:0045269)	4	3	0.14	+	21.28	0.000169	0.00246
proton-transporting ATP synthase complex, catalytic core F(1) (GO:0045261)	8	6	0.28	+	21.28	4.9e-08	1.07e-06
mitochondrial proton-transporting ATP synthase, central stalk (GO:0005756)	4	3	0.14	+	21.28	0.000169	0.00243
mitochondrial proton-transporting ATP synthase complex, catalytic sector F(1) (GO:0000275)	7	5	0.25	+	20.27	1.05e-06	2.03e-05
respiratory chain complex III (GO:0045275)	13	9	0.46	+	19.65	4.91e-11	1.29e-09
mitochondrial respiratory chain complex III (GO:0005750)	13	9	0.46	+	19.65	4.91e-11	1.27e-09
presynaptic periactive zone (GO:0036062)	3	2	0.11	+	18.92	0.00363	0.0391
myosin VII complex (GO:0031477)	3	2	0.11	+	18.92	0.00363	0.0388
myosin V complex (GO:0031475)	3	2	0.11	+	18.92	0.00363	0.0384
proton-transporting ATP synthase, catalytic core (GO:0045267)	3	2	0.11	+	18.92	0.00363	0.0381
mitochondrial proton-transporting ATP synthase, catalytic core (GO:0005754)	3	2	0.11	+	18.92	0.00363	0.0378
mitochondrial proton-transporting ATP synthase complex, coupling factor F(o) (GO:0000276)	14	9	0.49	+	18.24	1.33e-10	3.31e-09
proton-transporting ATP synthase complex, coupling factor F(o) (GO:0045263)	14	9	0.49	+	18.24	1.33e-10	3.25e-09
cytochrome complex (GO:0070069)	33	21	1.16	+	18.06	4.82e-23	2.07e-21
mitochondrial respiratory chain complex IV (GO:0005751)	19	12	0.67	+	17.92	1.29e-13	3.63e-12
proton-transporting ATP synthase complex (GO:0045259)	24	15	0.85	+	17.74	1.27e-16	3.9e-15
mitochondrial proton-transporting ATP synthase complex (GO:0005753)	24	15	0.85	+	17.74	1.27e-16	3.81e-15
mitochondrial proton-transporting ATP synthase, stator stalk (GO:0000274)	5	3	0.18	+	17.03	0.000412	0.00561
eukaryotic 43S preinitiation complex (GO:0016282)	5	3	0.18	+	17.03	0.000412	0.00555
respiratory chain complex IV (GO:0045277)	20	12	0.7	+	17.03	3.12e-13	8.59e-12
proton-transporting ATP synthase, stator stalk (GO:0045265)	5	3	0.18	+	17.03	0.000412	0.00549
U4 snRNP (GO:0005687)	6	3	0.21	+	14.19	0.000803	0.00988
translation preinitiation complex (GO:0070993)	6	3	0.21	+	14.19	0.000803	0.00979
endoplasmic reticulum chaperone complex (GO:0034663)	6	3	0.21	+	14.19	0.000803	0.0097
large ribosomal subunit (GO:0015934)	106	52	3.74	+	13.92	2.03e-47	2.39e-45
ribosomal subunit (GO:0044391)	178	85	6.27	+	13.55	2.06e-76	8.86e-74
mitochondrial respirasome (GO:0005746)	89	42	3.14	+	13.39	1.63e-37	1.17e-35
ribosome (GO:0005840)	183	86	6.45	+	13.34	1.46e-76	9.45e-74
respiratory chain complex (GO:0098803)	90	42	3.17	+	13.24	2.96e-37	2.01e-35
respirasome (GO:0070469)	90	42	3.17	+	13.24	2.96e-37	1.91e-35
small ribosomal subunit (GO:0015935)	75	34	2.64	+	12.87	8.41e-30	4.18e-28
proton-transporting two-sector ATPase complex, catalytic domain (GO:0033178)	19	8	0.67	+	11.95	1.2e-07	2.55e-06
respiratory chain complex I (GO:0045271)	51	21	1.8	+	11.69	8.61e-18	3.01e-16
NADH dehydrogenase complex (GO:0030964)	51	21	1.8	+	11.69	8.61e-18	2.93e-16
mitochondrial respiratory chain complex I (GO:0005747)	51	21	1.8	+	11.69	8.61e-18	2.85e-16
inner mitochondrial membrane protein complex (GO:0098800)	155	59	5.46	+	10.8	9.51e-46	9.46e-44
cytoplasmic stress granule (GO:0010494)	17	6	0.6	+	10.02	1.65e-05	0.000277
filopodium (GO:0030175)	15	5	0.53	+	9.46	0.000119	0.00183
oxidoreductase complex (GO:1990204)	96	31	3.38	+	9.16	6.2e-22	2.58e-20
fusome (GO:0045169)	38	12	1.34	+	8.96	3.76e-09	8.53e-08
proton-transporting two-sector ATPase complex, proton-transporting domain (GO:0033177)	32	10	1.13	+	8.87	8.64e-08	1.86e-06
eukaryotic translation initiation factor 3 complex (GO:0005852)	16	5	0.56	+	8.87	0.000168	0.00253
proton-transporting two-sector ATPase complex (GO:0016469)	59	18	2.08	+	8.66	8.74e-13	2.35e-11
perivitelline space (GO:0098595)	18	5	0.63	+	7.88	0.000311	0.00437
mitochondrial inner membrane (GO:0005743)	228	60	8.03	+	7.47	6.31e-36	3.88e-34
organelle inner membrane (GO:0019866)	236	60	8.32	+	7.22	5.35e-35	3.14e-33
intercellular bridge (GO:0045171)	26	6	0.92	+	6.55	0.000234	0.00332
mitochondrial protein-containing complex (GO:0098798)	273	63	9.62	+	6.55	4.76e-34	2.67e-32
polytene chromosome puff (GO:0005703)	44	10	1.55	+	6.45	2.27e-06	4.19e-05
germline ring canal (GO:0045172)	23	5	0.81	+	6.17	0.00106	0.0125
mitochondrial membrane (GO:0031966)	300	64	10.57	+	6.05	1.98e-32	1.07e-30
sno(s)RNA-containing ribonucleoprotein complex (GO:0005732)	19	4	0.67	+	5.97	0.00387	0.0394
basement membrane (GO:0005604)	20	4	0.7	+	5.68	0.00471	0.0457
mitochondrial envelope (GO:0005740)	330	66	11.63	+	5.68	1.2e-31	6.2e-30
ribonucleoprotein complex (GO:1990904)	556	109	19.59	+	5.56	6.01e-52	8.63e-50
transmembrane transporter complex (GO:1902495)	164	32	5.78	+	5.54	1.76e-15	5.18e-14
midbody (GO:0030496)	31	6	1.09	+	5.49	0.000645	0.00825
ATPase complex (GO:1904949)	116	22	4.09	+	5.38	8.67e-11	2.2e-09
presynaptic membrane (GO:0042734)	32	6	1.13	+	5.32	0.00077	0.00976
transporter complex (GO:1990351)	178	33	6.27	+	5.26	3.05e-15	8.77e-14
small-subunit processome (GO:0032040)	44	8	1.55	+	5.16	0.00013	0.00198
cytoplasmic side of plasma membrane (GO:0009898)	50	9	1.76	+	5.11	5.38e-05	0.000857
cleavage furrow (GO:0032154)	39	7	1.37	+	5.09	0.000373	0.00513
cytosol (GO:0005829)	998	162	35.17	+	4.61	4.34e-67	9.36e-65
envelope (GO:0031975)	457	74	16.1	+	4.6	3.55e-29	1.7e-27
organelle envelope (GO:0031967)	457	74	16.1	+	4.6	3.55e-29	1.64e-27
adherens junction (GO:0005912)	50	8	1.76	+	4.54	0.000327	0.00455
P granule (GO:0043186)	44	7	1.55	+	4.51	0.000799	0.00992
cytoplasmic side of membrane (GO:0098562)	63	10	2.22	+	4.5	6.42e-05	0.000999
germ plasm (GO:0060293)	46	7	1.62	+	4.32	0.00105	0.0126
cytoplasmic ribonucleoprotein granule (GO:0036464)	103	15	3.63	+	4.13	3.05e-06	5.39e-05
pole plasm (GO:0045495)	55	8	1.94	+	4.13	0.000636	0.00822
polytene chromosome (GO:0005700)	188	27	6.62	+	4.08	4.84e-10	1.12e-08
ribonucleoprotein granule (GO:0035770)	108	15	3.81	+	3.94	5.56e-06	9.58e-05
membrane protein complex (GO:0098796)	550	76	19.38	+	3.92	2.19e-25	9.78e-24
basolateral plasma membrane (GO:0016323)	44	6	1.55	+	3.87	0.0042	0.0418
cell-cell junction (GO:0005911)	126	17	4.44	+	3.83	2e-06	3.75e-05
cell division site (GO:0032153)	55	7	1.94	+	3.61	0.00303	0.0332
apical junction complex (GO:0043296)	56	7	1.97	+	3.55	0.00336	0.0365
basal plasma membrane (GO:0009925)	57	7	2.01	+	3.49	0.00372	0.0385
nuclear chromosome (GO:0000228)	124	15	4.37	+	3.43	3.02e-05	0.000488
anchoring junction (GO:0070161)	158	19	5.57	+	3.41	2.96e-06	5.31e-05
perinuclear region of cytoplasm (GO:0048471)	76	9	2.68	+	3.36	0.00136	0.0156
preribosome (GO:0030684)	81	9	2.85	+	3.15	0.00214	0.0238
cell cortex (GO:0005938)	193	21	6.8	+	3.09	4.54e-06	7.92e-05
neuromuscular junction (GO:0031594)	106	11	3.74	+	2.95	0.00126	0.0146
nucleolus (GO:0005730)	241	25	8.49	+	2.94	1.38e-06	2.61e-05
organelle membrane (GO:0031090)	845	87	29.77	+	2.92	3.97e-20	1.46e-18
intracellular non-membrane-bounded organelle (GO:0043232)	1658	170	58.42	+	2.91	2.59e-41	2.09e-39
non-membrane-bounded organelle (GO:0043228)	1658	170	58.42	+	2.91	2.59e-41	1.97e-39
side of membrane (GO:0098552)	106	10	3.74	+	2.68	0.00417	0.0421
mitochondrion (GO:0005739)	893	84	31.47	+	2.67	5.3e-17	1.67e-15
supramolecular complex (GO:0099080)	352	33	12.4	+	2.66	3.06e-07	6.08e-06
distal axon (GO:0150034)	108	10	3.81	+	2.63	0.00476	0.0459
axon (GO:0030424)	250	23	8.81	+	2.61	2.62e-05	0.000428
protein-containing complex (GO:0032991)	2900	258	102.19	+	2.52	1.28e-56	2.07e-54
catalytic step 2 spliceosome (GO:0071013)	124	11	4.37	+	2.52	0.00437	0.0431
supramolecular fiber (GO:0099512)	210	18	7.4	+	2.43	0.000462	0.00609
precatalytic spliceosome (GO:0071011)	141	12	4.97	+	2.42	0.00417	0.0418
catalytic complex (GO:1902494)	1182	100	41.65	+	2.4	5.17e-17	1.67e-15
polymeric cytoskeletal fiber (GO:0099513)	142	12	5	+	2.4	0.00441	0.0432
supramolecular polymer (GO:0099081)	213	18	7.51	+	2.4	0.000548	0.00715
chromosomal region (GO:0098687)	179	15	6.31	+	2.38	0.00168	0.0191
apical part of cell (GO:0045177)	187	15	6.59	+	2.28	0.00374	0.0384
cell junction (GO:0030054)	474	38	16.7	+	2.28	2.57e-06	4.67e-05
cytoplasm (GO:0005737)	4579	356	161.35	+	2.21	2.61e-75	8.44e-73
nuclear lumen (GO:0031981)	794	60	27.98	+	2.14	2.33e-08	5.2e-07
chromosome (GO:0005694)	641	48	22.59	+	2.13	7.97e-07	1.56e-05
nucleoplasm (GO:0005654)	499	37	17.58	+	2.1	1.84e-05	0.000305
plasma membrane region (GO:0098590)	368	26	12.97	+	2.01	0.000781	0.0098
intracellular organelle lumen (GO:0070013)	996	67	35.1	+	1.91	2.49e-07	5.18e-06
organelle lumen (GO:0043233)	997	67	35.13	+	1.91	2.54e-07	5.22e-06
membrane-enclosed lumen (GO:0031974)	997	67	35.13	+	1.91	2.54e-07	5.14e-06
intracellular organelle (GO:0043229)	5520	352	194.5	+	1.81	8.31e-49	1.07e-46
organelle (GO:0043226)	5640	354	198.73	+	1.78	2.05e-47	2.21e-45
intracellular anatomical structure (GO:0005622)	6634	409	233.76	+	1.75	3.13e-63	5.78e-61
intracellular membrane-bounded organelle (GO:0043231)	4894	275	172.45	+	1.59	7.35e-22	2.97e-20
nucleus (GO:0005634)	2833	158	99.82	+	1.58	3.27e-10	7.68e-09
plasma membrane (GO:0005886)	1390	77	48.98	+	1.57	5.9e-05	0.00093
membrane (GO:0016020)	2957	163	104.19	+	1.56	3.15e-10	7.54e-09
membrane-bounded organelle (GO:0043227)	5088	275	179.28	+	1.53	4.58e-19	1.64e-17
cellular anatomical entity (GO:0110165)	9272	450	326.71	+	1.38	1.18e-41	1.08e-39
cell periphery (GO:0071944)	1778	86	62.65	+	1.37	0.00189	0.0213
cellular_component (GO:0005575)	11049	462	389.33	+	1.19	1.45e-21	5.53e-20
Unclassified (UNCLASSIFIED)	2772	25	97.67	-	0.26	1.45e-21	5.7e-20
cilium (GO:0005929)	189	0	6.66	-	< 0.01	0.00216	0.0238

## Sheet: GSC enriched - cellular comp
Analysis Type:	PANTHER Overrepresentation Test (Released 20240226)
Annotation Version and Release Date:	GO Ontology database DOI: 10.5281/zenodo.10536401 Released 2024-01-17
Analyzed List:	upload_1 (Drosophila melanogaster)
Reference List:	Drosophila melanogaster (all genes in database)
Test Type:	FISHER
Correction:	FDR
GO cellular component complete	Drosophila melanogaster - REFLIST (13823)	upload_1 (740)	upload_1 (expected)	upload_1 (over/under)	upload_1 (fold Enrichment)	upload_1 (raw P-value)	upload_1 (FDR)
alpha DNA polymerase:primase complex (GO:0005658)	4	4	0.21	+	18.68	8.15e-06	0.00031
enzyme activator complex (GO:0150005)	2	2	0.11	+	18.68	0.00286	0.0493
FACT complex (GO:0035101)	2	2	0.11	+	18.68	0.00286	0.0487
DNA polymerase processivity factor complex (GO:0044796)	2	2	0.11	+	18.68	0.00286	0.0481
PCNA complex (GO:0043626)	2	2	0.11	+	18.68	0.00286	0.0474
synaptonemal complex (GO:0000795)	9	8	0.48	+	16.6	5.58e-10	4.81e-08
synaptonemal structure (GO:0099086)	9	8	0.48	+	16.6	5.58e-10	4.51e-08
Elg1 RFC-like complex (GO:0031391)	5	4	0.27	+	14.94	3.9e-05	0.00117
MCM complex (GO:0042555)	7	5	0.37	+	13.34	8.33e-06	0.000308
origin recognition complex (GO:0000808)	6	4	0.32	+	12.45	0.000112	0.00302
nuclear origin of replication recognition complex (GO:0005664)	6	4	0.32	+	12.45	0.000112	0.00296
DNA replication factor C complex (GO:0005663)	5	3	0.27	+	11.21	0.00141	0.0268
cohesin complex (GO:0008278)	5	3	0.27	+	11.21	0.00141	0.0264
cytoplasmic U snRNP body (GO:0071254)	7	4	0.37	+	10.67	0.00025	0.00589
nascent polypeptide-associated complex (GO:0005854)	9	5	0.48	+	10.38	4.56e-05	0.00131
CMG complex (GO:0071162)	11	6	0.59	+	10.19	8.45e-06	0.000304
nuclear replisome (GO:0043601)	11	6	0.59	+	10.19	8.45e-06	0.000295
replisome (GO:0030894)	11	6	0.59	+	10.19	8.45e-06	0.000288
DNA polymerase complex (GO:0042575)	15	8	0.8	+	9.96	2.99e-07	1.38e-05
nuclear replication fork (GO:0043596)	22	11	1.18	+	9.34	3.95e-09	2.83e-07
DNA replication preinitiation complex (GO:0031261)	12	6	0.64	+	9.34	1.61e-05	0.000509
replication fork (GO:0005657)	34	17	1.82	+	9.34	2.02e-13	3.26e-11
site of double-strand break (GO:0035861)	12	6	0.64	+	9.34	1.61e-05	0.000497
SMN complex (GO:0032797)	8	4	0.43	+	9.34	0.00048	0.0107
condensed nuclear chromosome (GO:0000794)	22	10	1.18	+	8.49	6.54e-08	4.23e-06
SMN-Sm protein complex (GO:0034719)	11	5	0.59	+	8.49	0.000153	0.00366
SUMO ligase complex (GO:0106068)	9	4	0.48	+	8.3	0.000827	0.0172
Smc5-Smc6 complex (GO:0030915)	9	4	0.48	+	8.3	0.000827	0.017
site of DNA damage (GO:0090734)	16	6	0.86	+	7	0.000116	0.00301
male germ cell nucleus (GO:0001673)	14	5	0.75	+	6.67	0.000579	0.0123
germ cell nucleus (GO:0043073)	23	7	1.23	+	5.69	0.000141	0.00351
chromocenter (GO:0010369)	23	7	1.23	+	5.69	0.000141	0.00344
germ plasm (GO:0060293)	47	14	2.52	+	5.56	9.22e-08	5.67e-06
nuclear chromosome (GO:0000228)	126	37	6.75	+	5.49	4.27e-18	9.2e-16
P granule (GO:0043186)	45	13	2.41	+	5.4	3.96e-07	1.71e-05
condensed chromosome (GO:0000793)	97	28	5.19	+	5.39	8.37e-14	1.55e-11
pole plasm (GO:0045495)	56	15	3	+	5	1.53e-07	7.34e-06
pericentric heterochromatin (GO:0005721)	28	7	1.5	+	4.67	0.000539	0.0116
nuclear pore (GO:0005643)	50	12	2.68	+	4.48	9.37e-06	0.000303
heterochromatin (GO:0000792)	59	14	3.16	+	4.43	1.97e-06	8.22e-05
condensed chromosome, centromeric region (GO:0000779)	53	11	2.84	+	3.88	9.29e-05	0.00256
chromosome, centromeric region (GO:0000775)	93	19	4.98	+	3.82	3.77e-07	1.68e-05
transcription elongation factor complex (GO:0008023)	42	8	2.25	+	3.56	0.00151	0.028
chromosome (GO:0005694)	644	120	34.48	+	3.48	4.76e-35	6.15e-32
protein-DNA complex (GO:0032993)	392	69	20.99	+	3.29	7.66e-19	1.98e-16
ribonucleoprotein granule (GO:0035770)	109	19	5.84	+	3.26	4.67e-06	0.000183
cytoplasmic ribonucleoprotein granule (GO:0036464)	104	18	5.57	+	3.23	9.16e-06	0.000304
nuclear body (GO:0016604)	74	12	3.96	+	3.03	0.000521	0.0114
chromatin (GO:0000785)	359	56	19.22	+	2.91	3.56e-13	4.61e-11
nuclear DNA-directed RNA polymerase complex (GO:0055029)	90	13	4.82	+	2.7	0.000964	0.0195
chromosomal region (GO:0098687)	181	26	9.69	+	2.68	3.99e-06	0.000161
DNA-directed RNA polymerase complex (GO:0000428)	91	13	4.87	+	2.67	0.00107	0.0213
RNA polymerase complex (GO:0030880)	92	13	4.93	+	2.64	0.00119	0.0233
transferase complex, transferring phosphorus-containing groups (GO:0061695)	179	22	9.58	+	2.3	0.00028	0.00648
nuclear envelope (GO:0005635)	131	16	7.01	+	2.28	0.0024	0.0432
nuclear lumen (GO:0031981)	799	92	42.77	+	2.15	1.78e-12	2.09e-10
nuclear protein-containing complex (GO:0140513)	805	91	43.09	+	2.11	7.31e-12	7.88e-10
intracellular non-membrane-bounded organelle (GO:0043232)	1666	187	89.19	+	2.1	2.36e-24	1.02e-21
non-membrane-bounded organelle (GO:0043228)	1666	187	89.19	+	2.1	2.36e-24	7.64e-22
supramolecular complex (GO:0099080)	356	38	19.06	+	1.99	6.02e-05	0.00169
transcription regulator complex (GO:0005667)	224	23	11.99	+	1.92	0.00247	0.0438
nucleus (GO:0005634)	2848	279	152.46	+	1.83	3.94e-28	2.55e-25
nucleoplasm (GO:0005654)	501	49	26.82	+	1.83	4.25e-05	0.00125
intracellular organelle lumen (GO:0070013)	1002	93	53.64	+	1.73	1.19e-07	6.7e-06
organelle lumen (GO:0043233)	1003	93	53.69	+	1.73	1.22e-07	6.59e-06
membrane-enclosed lumen (GO:0031974)	1003	93	53.69	+	1.73	1.22e-07	6.33e-06
transferase complex (GO:1990234)	522	44	27.94	+	1.57	0.00277	0.0484
protein-containing complex (GO:0032991)	2917	239	156.16	+	1.53	3.32e-13	4.77e-11
intracellular organelle (GO:0043229)	5545	384	296.85	+	1.29	3.56e-11	3.54e-09
organelle (GO:0043226)	5666	390	303.32	+	1.29	4.25e-11	3.93e-09
intracellular membrane-bounded organelle (GO:0043231)	4918	331	263.28	+	1.26	1.42e-07	7.08e-06
membrane-bounded organelle (GO:0043227)	5113	343	273.72	+	1.25	9.42e-08	5.54e-06
intracellular anatomical structure (GO:0005622)	6663	431	356.7	+	1.21	2.01e-08	1.37e-06
cellular anatomical entity (GO:0110165)	9317	546	498.78	+	1.09	0.000126	0.00318
organelle membrane (GO:0031090)	851	26	45.56	-	0.57	0.00123	0.0238
mitochondrial envelope (GO:0005740)	330	6	17.67	-	0.34	0.00179	0.0326
mitochondrion (GO:0005739)	895	14	47.91	-	0.29	3.31e-09	2.52e-07
mitochondrial protein-containing complex (GO:0098798)	274	3	14.67	-	0.2	0.000349	0.00792

## Sheet: CySC enriched - molec funct
Analysis Type:	PANTHER Overrepresentation Test (Released 20240226)
Annotation Version and Release Date:	GO Ontology database DOI: 10.5281/zenodo.10536401 Released 2024-01-17
Analyzed List:	upload_1 (Drosophila melanogaster)
Reference List:	Drosophila melanogaster (all genes in database)
Test Type:	FISHER
Correction:	FDR
GO molecular function complete	Drosophila melanogaster - REFLIST (13823)	upload_1 (1647)	upload_1 (expected)	upload_1 (over/under)	upload_1 (fold Enrichment)	upload_1 (raw P-value)	upload_1 (FDR)
L-galactose dehydrogenase activity (GO:0010349)	3	3	0.36	+	8.39	0.00169	0.0492
AMP binding (GO:0016208)	4	4	0.48	+	8.39	0.000201	0.00952
receptor serine/threonine kinase binding (GO:0033612)	4	4	0.48	+	8.39	0.000201	0.00937
BMP receptor binding (GO:0070700)	3	3	0.36	+	8.39	0.00169	0.0488
morphogen activity (GO:0016015)	5	5	0.6	+	8.39	2.39e-05	0.00165
CoA-transferase activity (GO:0008410)	3	3	0.36	+	8.39	0.00169	0.0483
trehalose transmembrane transporter activity (GO:0015574)	3	3	0.36	+	8.39	0.00169	0.0479
transmembrane receptor protein serine/threonine kinase binding (GO:0070696)	4	4	0.48	+	8.39	0.000201	0.00923
D-arabinose 1-dehydrogenase [NAD(P)+] activity (GO:0045290)	3	3	0.36	+	8.39	0.00169	0.0474
extracellular matrix binding (GO:0050840)	7	6	0.83	+	7.19	1.78e-05	0.00132
imaginal disc growth factor receptor binding (GO:0008084)	6	5	0.71	+	6.99	0.000129	0.00687
collagen binding (GO:0005518)	6	5	0.71	+	6.99	0.000129	0.00675
pattern recognition receptor activity (GO:0038187)	6	5	0.71	+	6.99	0.000129	0.00664
short-chain fatty acyl-CoA dehydrogenase activity (GO:0016937)	5	4	0.6	+	6.71	0.000909	0.0296
oligosaccharide transmembrane transporter activity (GO:0015157)	5	4	0.6	+	6.71	0.000909	0.0293
disaccharide transmembrane transporter activity (GO:0015154)	5	4	0.6	+	6.71	0.000909	0.029
oxidoreductase activity, acting on the CH-CH group of donors, with a flavin as acceptor (GO:0052890)	9	7	1.07	+	6.53	9.75e-06	0.000844
acyl-CoA dehydrogenase activity (GO:0003995)	9	7	1.07	+	6.53	9.75e-06	0.000821
growth factor receptor binding (GO:0070851)	25	18	2.98	+	6.04	4.53e-12	2.74e-09
growth factor activity (GO:0008083)	21	14	2.5	+	5.6	5.68e-09	1.23e-06
cell-cell adhesion mediator activity (GO:0098632)	12	8	1.43	+	5.6	1.27e-05	0.00101
epidermal growth factor receptor binding (GO:0005154)	9	6	1.07	+	5.6	0.000173	0.00859
cell adhesion mediator activity (GO:0098631)	17	11	2.03	+	5.43	4.15e-07	5.47e-05
cysteine-type endopeptidase inhibitor activity (GO:0004869)	8	5	0.95	+	5.25	0.000979	0.0306
omega peptidase activity (GO:0008242)	8	5	0.95	+	5.25	0.000979	0.0303
transmembrane receptor protein tyrosine kinase activity (GO:0004714)	17	10	2.03	+	4.94	4.94e-06	0.000468
cytokine activity (GO:0005125)	25	14	2.98	+	4.7	1.37e-07	2.07e-05
transmembrane receptor protein kinase activity (GO:0019199)	22	12	2.62	+	4.58	1.61e-06	0.000188
glutathione transferase activity (GO:0004364)	38	18	4.53	+	3.98	6.82e-08	1.15e-05
cytokine receptor binding (GO:0005126)	17	8	2.03	+	3.95	0.000359	0.0151
glutathione peroxidase activity (GO:0004602)	17	8	2.03	+	3.95	0.000359	0.0149
cytokine binding (GO:0019955)	15	7	1.79	+	3.92	0.000908	0.0299
Wnt-protein binding (GO:0017147)	18	8	2.14	+	3.73	0.000579	0.0222
cell adhesion molecule binding (GO:0050839)	71	31	8.46	+	3.66	1.83e-11	9.26e-09
protein tyrosine kinase activity (GO:0004713)	30	13	3.57	+	3.64	1.57e-05	0.00122
carbohydrate derivative transmembrane transporter activity (GO:1901505)	23	9	2.74	+	3.28	0.00081	0.0282
glycosaminoglycan binding (GO:0005539)	39	14	4.65	+	3.01	9.16e-05	0.00524
receptor ligand activity (GO:0048018)	109	36	12.99	+	2.77	5.13e-09	1.3e-06
oxidoreductase activity, acting on peroxide as acceptor (GO:0016684)	43	14	5.12	+	2.73	0.0003	0.013
peroxidase activity (GO:0004601)	43	14	5.12	+	2.73	0.0003	0.0128
signaling receptor regulator activity (GO:0030545)	120	39	14.3	+	2.73	2.01e-09	5.55e-07
signaling receptor binding (GO:0005102)	268	87	31.93	+	2.72	2.53e-19	7.66e-16
signaling receptor activator activity (GO:0030546)	114	37	13.58	+	2.72	5.41e-09	1.26e-06
oxidoreductase activity, acting on the CH-OH group of donors, NAD or NADP as acceptor (GO:0016616)	108	34	12.87	+	2.64	5.25e-08	9.36e-06
transferase activity, transferring alkyl or aryl (other than methyl) groups (GO:0016765)	66	20	7.86	+	2.54	5.29e-05	0.00327
ABC-type transporter activity (GO:0140359)	51	15	6.08	+	2.47	0.000633	0.0231
antioxidant activity (GO:0016209)	55	16	6.55	+	2.44	0.000484	0.0193
oxidoreductase activity, acting on CH-OH group of donors (GO:0016614)	129	37	15.37	+	2.41	2.76e-07	3.98e-05
sulfur compound binding (GO:1901681)	50	14	5.96	+	2.35	0.00161	0.0479
peptidase inhibitor activity (GO:0030414)	87	24	10.37	+	2.32	7.01e-05	0.00417
calcium ion binding (GO:0005509)	203	56	24.19	+	2.32	9.79e-10	2.97e-07
inorganic anion transmembrane transporter activity (GO:0015103)	66	18	7.86	+	2.29	0.000751	0.0271
endopeptidase inhibitor activity (GO:0004866)	84	22	10.01	+	2.2	0.000273	0.0122
identical protein binding (GO:0042802)	142	37	16.92	+	2.19	2.95e-06	0.000308
flavin adenine dinucleotide binding (GO:0050660)	70	18	8.34	+	2.16	0.00125	0.038
organic anion transmembrane transporter activity (GO:0008514)	152	39	18.11	+	2.15	3.08e-06	0.000311
protein homodimerization activity (GO:0042803)	117	30	13.94	+	2.15	3.76e-05	0.00248
actin filament binding (GO:0051015)	86	22	10.25	+	2.15	0.000583	0.0221
molecular function inhibitor activity (GO:0140678)	135	34	16.09	+	2.11	2.1e-05	0.00148
actin binding (GO:0003779)	130	32	15.49	+	2.07	5.35e-05	0.00324
endopeptidase regulator activity (GO:0061135)	90	22	10.72	+	2.05	0.000845	0.0291
carboxylic acid transmembrane transporter activity (GO:0046943)	123	30	14.66	+	2.05	0.000112	0.00626
organic acid transmembrane transporter activity (GO:0005342)	123	30	14.66	+	2.05	0.000112	0.00615
peptidase regulator activity (GO:0061134)	111	27	13.23	+	2.04	0.000295	0.013
enzyme inhibitor activity (GO:0004857)	124	30	14.77	+	2.03	0.000124	0.00671
hydrolase activity, acting on carbon-nitrogen (but not peptide) bonds (GO:0016810)	91	22	10.84	+	2.03	0.000951	0.03
iron ion binding (GO:0005506)	155	35	18.47	+	1.9	0.000152	0.00768
oxidoreductase activity (GO:0016491)	597	132	71.13	+	1.86	5.91e-13	5.97e-10
heme binding (GO:0020037)	137	30	16.32	+	1.84	0.000803	0.0283
tetrapyrrole binding (GO:0046906)	138	30	16.44	+	1.82	0.000875	0.0298
molecular function activator activity (GO:0140677)	317	65	37.77	+	1.72	9.48e-06	0.000845
lipid binding (GO:0008289)	227	45	27.05	+	1.66	0.000576	0.0224
active transmembrane transporter activity (GO:0022804)	243	48	28.95	+	1.66	0.000415	0.0168
molecular function regulator activity (GO:0098772)	653	126	77.8	+	1.62	2.8e-08	5.65e-06
protein dimerization activity (GO:0046983)	272	51	32.41	+	1.57	0.000885	0.0298
cation binding (GO:0043169)	1083	188	129.04	+	1.46	3.96e-08	7.51e-06
transporter activity (GO:0005215)	861	148	102.59	+	1.44	2.71e-06	0.000294
transmembrane transporter activity (GO:0022857)	805	138	95.92	+	1.44	6.76e-06	0.000621
metal ion binding (GO:0046872)	1053	180	125.46	+	1.43	3.06e-07	4.22e-05
protein binding (GO:0005515)	2383	375	283.93	+	1.32	8.65e-10	2.91e-07
ion binding (GO:0043167)	1994	303	237.58	+	1.28	2e-06	0.000225
small molecule binding (GO:0036094)	2122	322	252.83	+	1.27	1.01e-06	0.000123
catalytic activity (GO:0003824)	3751	533	446.93	+	1.19	5.88e-07	7.42e-05
binding (GO:0005488)	5476	717	652.46	+	1.1	0.000589	0.022
nucleic acid binding (GO:0003676)	1724	125	205.41	-	0.61	2e-11	8.68e-09
structural molecule activity (GO:0005198)	486	28	57.91	-	0.48	4.46e-06	0.000436
chromatin binding (GO:0003682)	236	12	28.12	-	0.43	0.000509	0.0201
RNA binding (GO:0003723)	671	25	79.95	-	0.31	3.87e-14	5.86e-11
catalytic activity, acting on DNA (GO:0140097)	139	5	16.56	-	0.3	0.00089	0.0297
transferase activity, transferring one-carbon groups (GO:0016741)	140	4	16.68	-	0.24	0.000199	0.00958
structural constituent of chitin-based larval cuticle (GO:0008010)	134	3	15.97	-	0.19	7.7e-05	0.00449
translation regulator activity, nucleic acid binding (GO:0090079)	91	2	10.84	-	0.18	0.00166	0.0488
catalytic activity, acting on a nucleic acid (GO:0140640)	378	8	45.04	-	0.18	2.45e-12	1.86e-09
translation regulator activity (GO:0045182)	98	2	11.68	-	0.17	0.000791	0.0282
structural constituent of chitin-based cuticle (GO:0005214)	148	3	17.63	-	0.17	1.75e-05	0.00133
structural constituent of cuticle (GO:0042302)	149	3	17.75	-	0.17	1.79e-05	0.00129
S-adenosylmethionine-dependent methyltransferase activity (GO:0008757)	126	2	15.01	-	0.13	3.92e-05	0.00253
catalytic activity, acting on RNA (GO:0140098)	260	4	30.98	-	0.13	4.26e-10	1.61e-07
methyltransferase activity (GO:0008168)	134	2	15.97	-	0.13	1.17e-05	0.000958
structural constituent of ribosome (GO:0003735)	177	2	21.09	-	0.09	1.16e-07	1.85e-05
olfactory receptor activity (GO:0004984)	69	0	8.22	-	< 0.01	0.00026	0.0118
ATP-dependent activity, acting on DNA (GO:0008094)	67	0	7.98	-	< 0.01	0.000413	0.0169
RNA helicase activity (GO:0003724)	55	0	6.55	-	< 0.01	0.0014	0.0421
taste receptor activity (GO:0008527)	61	0	7.27	-	< 0.01	0.000994	0.0304
protein methyltransferase activity (GO:0008276)	63	0	7.51	-	< 0.01	0.000613	0.0227
translation factor activity, RNA binding (GO:0008135)	73	0	8.7	-	< 0.01	0.000174	0.00849
catalytic activity, acting on a tRNA (GO:0140101)	85	0	10.13	-	< 0.01	3.15e-05	0.00212
helicase activity (GO:0004386)	83	0	9.89	-	< 0.01	4.93e-05	0.00311

## Sheet: GSC enriched - molec funct
Analysis Type:	PANTHER Overrepresentation Test (Released 20240226)
Annotation Version and Release Date:	GO Ontology database DOI: 10.5281/zenodo.10536401 Released 2024-01-17
Analyzed List:	upload_1 (Drosophila melanogaster)
Reference List:	Drosophila melanogaster (all genes in database)
Test Type:	FISHER
Correction:	FDR
GO molecular function complete	Drosophila melanogaster - REFLIST (13823)	upload_1 (740)	upload_1 (expected)	upload_1 (over/under)	upload_1 (fold Enrichment)	upload_1 (raw P-value)	upload_1 (FDR)
DNA replication origin binding (GO:0003688)	10	8	0.54	+	14.94	2.66e-09	8.06e-07
5'-flap endonuclease activity (GO:0017108)	6	4	0.32	+	12.45	0.000112	0.0162
DNA clamp loader activity (GO:0003689)	7	4	0.37	+	10.67	0.00025	0.0304
flap endonuclease activity (GO:0048256)	7	4	0.37	+	10.67	0.00025	0.0292
single-stranded DNA helicase activity (GO:0017116)	10	5	0.54	+	9.34	8.73e-05	0.0147
SUMO transferase activity (GO:0019789)	15	7	0.8	+	8.72	5.4e-06	0.00117
3'-5' DNA helicase activity (GO:0043138)	14	6	0.75	+	8.01	4.78e-05	0.00853
3'-5'-DNA exonuclease activity (GO:0008296)	13	5	0.7	+	7.18	0.000389	0.0437
DNA exonuclease activity, producing 5'-phosphomonoesters (GO:0016895)	18	6	0.96	+	6.23	0.000246	0.0324
DNA exonuclease activity (GO:0004529)	18	6	0.96	+	6.23	0.000246	0.031
endonuclease activity, active with either ribo- or deoxyribonucleic acids and producing 5'-phosphomonoesters (GO:0016893)	22	7	1.18	+	5.94	0.000103	0.0156
ATP-dependent activity, acting on DNA (GO:0008094)	67	20	3.59	+	5.58	1.55e-10	7.84e-08
DNA helicase activity (GO:0003678)	29	8	1.55	+	5.15	0.000102	0.0163
single-stranded DNA binding (GO:0003697)	49	13	2.62	+	4.96	1.17e-06	0.000272
catalytic activity, acting on DNA (GO:0140097)	139	32	7.44	+	4.3	1.37e-12	2.07e-09
helicase activity (GO:0004386)	83	18	4.44	+	4.05	2.97e-07	7.51e-05
chromatin binding (GO:0003682)	236	42	12.63	+	3.32	4.49e-12	3.4e-09
histone binding (GO:0042393)	87	14	4.66	+	3.01	0.000199	0.0275
ATP-dependent activity (GO:0140657)	404	53	21.63	+	2.45	1.33e-09	5.04e-07
ATP hydrolysis activity (GO:0016887)	235	30	12.58	+	2.38	1.07e-05	0.00217
catalytic activity, acting on a nucleic acid (GO:0140640)	378	46	20.24	+	2.27	1.65e-07	4.55e-05
protein-containing complex binding (GO:0044877)	507	61	27.14	+	2.25	2.24e-09	7.56e-07
DNA binding (GO:0003677)	947	103	50.7	+	2.03	2.34e-12	2.36e-09
nucleic acid binding (GO:0003676)	1724	172	92.29	+	1.86	6.43e-17	1.95e-13
RNA binding (GO:0003723)	671	62	35.92	+	1.73	2.14e-05	0.00406
organic cyclic compound binding (GO:0097159)	2753	219	147.38	+	1.49	9.72e-11	5.89e-08
binding (GO:0005488)	5476	375	293.15	+	1.28	4.29e-10	1.86e-07

## Sheet: CySC enriched - cellular comp
Analysis Type:	PANTHER Overrepresentation Test (Released 20240226)
Annotation Version and Release Date:	GO Ontology database DOI: 10.5281/zenodo.10536401 Released 2024-01-17
Analyzed List:	upload_1 (Drosophila melanogaster)
Reference List:	Drosophila melanogaster (all genes in database)
Test Type:	FISHER
Correction:	FDR
GO cellular component complete	Drosophila melanogaster - REFLIST (13823)	upload_1 (1647)	upload_1 (expected)	upload_1 (over/under)	upload_1 (fold Enrichment)	upload_1 (raw P-value)	upload_1 (FDR)
integrin complex (GO:0008305)	7	5	0.83	+	5.99	0.000407	0.00572
protein complex involved in cell adhesion (GO:0098636)	7	5	0.83	+	5.99	0.000407	0.00566
septate junction (GO:0005918)	35	22	4.17	+	5.28	1.3e-12	8.03e-11
tight junction (GO:0070160)	40	25	4.77	+	5.25	4.53e-14	3.25e-12
perivitelline space (GO:0098595)	18	11	2.14	+	5.13	9.52e-07	2.24e-05
muscle tendon junction (GO:0005927)	14	8	1.67	+	4.8	6.17e-05	0.00108
apical junction complex (GO:0043296)	56	31	6.67	+	4.65	4.89e-15	3.95e-13
focal adhesion (GO:0005925)	26	14	3.1	+	4.52	2.64e-07	7.11e-06
cytoneme (GO:0035230)	12	6	1.43	+	4.2	0.00138	0.016
cell-substrate junction (GO:0030055)	39	19	4.65	+	4.09	1.64e-08	5.89e-07
I band (GO:0031674)	47	21	5.6	+	3.75	2.02e-08	7.04e-07
anchoring junction (GO:0070161)	159	71	18.94	+	3.75	3.12e-25	1.01e-22
cell-cell junction (GO:0005911)	126	56	15.01	+	3.73	4.74e-20	7.67e-18
Z disc (GO:0030018)	46	20	5.48	+	3.65	7.69e-08	2.37e-06
lateral plasma membrane (GO:0016328)	19	8	2.26	+	3.53	0.000896	0.0111
M band (GO:0031430)	17	7	2.03	+	3.46	0.00221	0.0236
apicolateral plasma membrane (GO:0016327)	22	9	2.62	+	3.43	0.000551	0.0075
sarcomere (GO:0030017)	64	26	7.63	+	3.41	5.07e-09	1.99e-07
axonal growth cone (GO:0044295)	15	6	1.79	+	3.36	0.00546	0.049
basement membrane (GO:0005604)	20	8	2.38	+	3.36	0.00134	0.0156
multivesicular body (GO:0005771)	15	6	1.79	+	3.36	0.00546	0.0487
myofibril (GO:0030016)	68	27	8.1	+	3.33	4.69e-09	1.95e-07
contractile fiber (GO:0043292)	73	28	8.7	+	3.22	6.11e-09	2.32e-07
presynaptic membrane (GO:0042734)	32	12	3.81	+	3.15	0.000179	0.00273
adherens junction (GO:0005912)	50	18	5.96	+	3.02	8.95e-06	0.00019
A band (GO:0031672)	24	8	2.86	+	2.8	0.00506	0.0464
basal plasma membrane (GO:0009925)	58	19	6.91	+	2.75	2.41e-05	0.000458
fusome (GO:0045169)	38	12	4.53	+	2.65	0.00109	0.0129
actin filament (GO:0005884)	29	9	3.46	+	2.6	0.00512	0.0466
collagen-containing extracellular matrix (GO:0062023)	46	14	5.48	+	2.55	0.000652	0.00869
apical plasma membrane (GO:0016324)	101	30	12.03	+	2.49	1.26e-06	2.92e-05
receptor complex (GO:0043235)	77	22	9.17	+	2.4	6.19e-05	0.00107
basal part of cell (GO:0045178)	82	23	9.77	+	2.35	8.78e-05	0.00145
apical part of cell (GO:0045177)	188	52	22.4	+	2.32	3.97e-09	1.77e-07
cell junction (GO:0030054)	479	132	57.07	+	2.31	3.23e-21	6.95e-19
early endosome (GO:0005769)	77	21	9.17	+	2.29	0.000242	0.0036
terminal bouton (GO:0043195)	72	19	8.58	+	2.21	0.000689	0.00908
lysosome (GO:0005764)	117	30	13.94	+	2.15	3.76e-05	0.000694
lytic vacuole (GO:0000323)	118	30	14.06	+	2.13	4.3e-05	0.000772
axon terminus (GO:0043679)	83	21	9.89	+	2.12	0.000885	0.0111
neuron projection terminus (GO:0044306)	84	21	10.01	+	2.1	0.000956	0.0116
distal axon (GO:0150034)	109	27	12.99	+	2.08	0.000161	0.00251
neuromuscular junction (GO:0031594)	106	26	12.63	+	2.06	0.000249	0.00366
plasma membrane (GO:0005886)	1401	338	166.93	+	2.02	9.53e-42	1.23e-38
late endosome (GO:0005770)	91	21	10.84	+	1.94	0.00284	0.0291
axon (GO:0030424)	252	58	30.03	+	1.93	6.01e-07	1.47e-05
synaptic membrane (GO:0097060)	87	20	10.37	+	1.93	0.00394	0.0369
cell surface (GO:0009986)	96	22	11.44	+	1.92	0.00223	0.0237
postsynapse (GO:0098794)	92	21	10.96	+	1.92	0.00306	0.0309
cell cortex (GO:0005938)	193	43	23	+	1.87	4.3e-05	0.000783
presynapse (GO:0098793)	181	40	21.57	+	1.85	0.000107	0.00176
extracellular space (GO:0005615)	729	158	86.86	+	1.82	1.6e-14	1.22e-12
plasma membrane protein complex (GO:0098797)	171	37	20.37	+	1.82	0.000299	0.00425
cell periphery (GO:0071944)	1789	381	213.16	+	1.79	3.63e-34	2.35e-31
extracellular region (GO:0005576)	1066	227	127.01	+	1.79	1.11e-19	1.6e-17
vacuole (GO:0005773)	188	40	22.4	+	1.79	0.000239	0.00359
actin cytoskeleton (GO:0015629)	128	27	15.25	+	1.77	0.0035	0.0333
plasma membrane region (GO:0098590)	370	78	44.09	+	1.77	3.46e-07	8.94e-06
supramolecular polymer (GO:0099081)	216	44	25.74	+	1.71	0.000411	0.00566
supramolecular fiber (GO:0099512)	213	43	25.38	+	1.69	0.000563	0.00758
endosome (GO:0005768)	271	54	32.29	+	1.67	0.000132	0.0021
synapse (GO:0045202)	334	65	39.8	+	1.63	5.26e-05	0.000931
intracellular vesicle (GO:0097708)	449	85	53.5	+	1.59	1.12e-05	0.000233
cytoplasmic vesicle (GO:0031410)	449	85	53.5	+	1.59	1.12e-05	0.000229
vesicle (GO:0031982)	488	91	58.14	+	1.57	1.24e-05	0.000251
membrane (GO:0016020)	2977	514	354.71	+	1.45	1.57e-22	4.06e-20
neuron projection (GO:0043005)	471	77	56.12	+	1.37	0.0037	0.0349
cytoplasm (GO:0005737)	4599	609	547.97	+	1.11	0.000746	0.00974
cellular anatomical entity (GO:0110165)	9317	1201	1110.11	+	1.08	2.88e-07	7.61e-06
organelle (GO:0043226)	5666	566	675.1	-	0.84	4.82e-09	1.95e-07
intracellular organelle (GO:0043229)	5545	553	660.68	-	0.84	6.92e-09	2.55e-07
intracellular membrane-bounded organelle (GO:0043231)	4918	480	585.98	-	0.82	4.22e-09	1.82e-07
membrane-bounded organelle (GO:0043227)	5113	489	609.21	-	0.8	3.65e-11	2.05e-09
intracellular non-membrane-bounded organelle (GO:0043232)	1666	123	198.5	-	0.62	1.59e-10	8.57e-09
non-membrane-bounded organelle (GO:0043228)	1666	123	198.5	-	0.62	1.59e-10	8.23e-09
nucleus (GO:0005634)	2848	210	339.34	-	0.62	1.72e-18	2.22e-16
microtubule cytoskeleton (GO:0015630)	375	27	44.68	-	0.6	0.00348	0.0333
protein-containing complex (GO:0032991)	2917	173	347.56	-	0.5	3.1e-33	1.34e-30
nucleoplasm (GO:0005654)	501	27	59.69	-	0.45	7.12e-07	1.7e-05
transferase complex (GO:1990234)	522	28	62.2	-	0.45	3.94e-07	9.99e-06
cilium (GO:0005929)	189	10	22.52	-	0.44	0.00305	0.0311
transferase complex, transferring phosphorus-containing groups (GO:0061695)	179	9	21.33	-	0.42	0.00238	0.025
catalytic complex (GO:1902494)	1187	58	141.43	-	0.41	6.99e-18	7.53e-16
intracellular organelle lumen (GO:0070013)	1002	48	119.39	-	0.4	1.46e-15	1.45e-13
organelle lumen (GO:0043233)	1003	48	119.51	-	0.4	1.46e-15	1.35e-13
membrane-enclosed lumen (GO:0031974)	1003	48	119.51	-	0.4	1.46e-15	1.26e-13
envelope (GO:0031975)	461	22	54.93	-	0.4	1.55e-07	4.44e-06
organelle envelope (GO:0031967)	461	22	54.93	-	0.4	1.55e-07	4.35e-06
intracellular protein-containing complex (GO:0140535)	616	28	73.4	-	0.38	1.87e-10	9.31e-09
nuclear lumen (GO:0031981)	799	35	95.2	-	0.37	5.56e-14	3.79e-12
mitochondrial envelope (GO:0005740)	330	13	39.32	-	0.33	4.49e-07	1.12e-05
chromosome (GO:0005694)	644	25	76.73	-	0.33	3.9e-13	2.52e-11
chromosomal region (GO:0098687)	181	7	21.57	-	0.32	0.000283	0.00407
cullin-RING ubiquitin ligase complex (GO:0031461)	112	4	13.34	-	0.3	0.00313	0.0314
mitochondrial membrane (GO:0031966)	300	10	35.74	-	0.28	1.81e-07	4.97e-06
nuclear chromosome (GO:0000228)	126	4	15.01	-	0.27	0.000803	0.0102
leading edge membrane (GO:0031256)	99	3	11.8	-	0.25	0.00282	0.0292
nuclear protein-containing complex (GO:0140513)	805	24	95.92	-	0.25	1.31e-20	2.42e-18
mitochondrial protein-containing complex (GO:0098798)	274	8	32.65	-	0.25	1.33e-07	4.01e-06
microtubule associated complex (GO:0005875)	106	3	12.63	-	0.24	0.00139	0.0159
chromatin (GO:0000785)	359	10	42.77	-	0.23	4.86e-10	2.33e-08
cell projection membrane (GO:0031253)	112	3	13.34	-	0.22	0.00102	0.0122
protein-DNA complex (GO:0032993)	392	10	46.71	-	0.21	1.32e-11	7.73e-10
plasma membrane bounded cell projection cytoplasm (GO:0032838)	79	2	9.41	-	0.21	0.00491	0.0456
protein acetyltransferase complex (GO:0031248)	83	2	9.89	-	0.2	0.00341	0.0331
acetyltransferase complex (GO:1902493)	83	2	9.89	-	0.2	0.00341	0.0329
mitochondrial respirasome (GO:0005746)	89	2	10.6	-	0.19	0.00163	0.0182
respiratory chain complex (GO:0098803)	90	2	10.72	-	0.19	0.00163	0.018
respirasome (GO:0070469)	90	2	10.72	-	0.19	0.00163	0.0179
mitochondrial inner membrane (GO:0005743)	228	5	27.17	-	0.18	1.35e-07	3.97e-06
neuron projection membrane (GO:0032589)	94	2	11.2	-	0.18	0.00113	0.0133
organelle inner membrane (GO:0019866)	236	5	28.12	-	0.18	4.25e-08	1.41e-06
ribonucleoprotein complex (GO:1990904)	556	11	66.25	-	0.17	1.79e-18	2.1e-16
inner mitochondrial membrane protein complex (GO:0098800)	155	3	18.47	-	0.16	8.3e-06	0.000182
chitin-based extracellular matrix (GO:0062129)	155	3	18.47	-	0.16	8.3e-06	0.000179
Sm-like protein family complex (GO:0120114)	69	1	8.22	-	0.12	0.00253	0.0264
precatalytic spliceosome (GO:0071011)	141	2	16.8	-	0.12	5.39e-06	0.00012
small ribosomal subunit (GO:0015935)	75	1	8.94	-	0.11	0.00181	0.0196
organellar ribosome (GO:0000313)	80	1	9.53	-	0.1	0.000782	0.0101
mitochondrial ribosome (GO:0005761)	80	1	9.53	-	0.1	0.000782	0.01
nucleolus (GO:0005730)	241	3	28.71	-	0.1	5.56e-10	2.57e-08
ribosomal subunit (GO:0044391)	178	2	21.21	-	0.09	7.19e-08	2.27e-06
ribosome (GO:0005840)	183	2	21.8	-	0.09	5.05e-08	1.63e-06
chromosome, centromeric region (GO:0000775)	93	1	11.08	-	0.09	0.00016	0.00252
spliceosomal complex (GO:0005681)	187	2	22.28	-	0.09	3.51e-08	1.19e-06
peptidase complex (GO:1905368)	94	1	11.2	-	0.09	0.000162	0.00249
condensed chromosome (GO:0000793)	97	1	11.56	-	0.09	0.000108	0.00175
cytosolic ribosome (GO:0022626)	100	1	11.91	-	0.08	7.23e-05	0.00123
large ribosomal subunit (GO:0015934)	106	1	12.63	-	0.08	3.25e-05	0.000609
catalytic step 2 spliceosome (GO:0071013)	124	1	14.77	-	0.07	4.4e-06	9.99e-05
RNA polymerase II, holoenzyme (GO:0016591)	69	0	8.22	-	< 0.01	0.00026	0.00378
proteasome complex (GO:0000502)	55	0	6.55	-	< 0.01	0.0014	0.0159
heterochromatin (GO:0000792)	59	0	7.03	-	< 0.01	0.000921	0.0113
DNA-directed RNA polymerase complex (GO:0000428)	91	0	10.84	-	< 0.01	1.36e-05	0.000267
condensed chromosome, centromeric region (GO:0000779)	53	0	6.31	-	< 0.01	0.00217	0.0234
kinetochore (GO:0000776)	47	0	5.6	-	< 0.01	0.00518	0.0469
nuclear DNA-directed RNA polymerase complex (GO:0055029)	90	0	10.72	-	< 0.01	2.16e-05	0.000418
preribosome (GO:0030684)	81	0	9.65	-	< 0.01	8.06e-05	0.00135
spliceosomal snRNP complex (GO:0097525)	50	0	5.96	-	< 0.01	0.00335	0.0333
endopeptidase complex (GO:1905369)	60	0	7.15	-	< 0.01	0.000945	0.0115
organellar large ribosomal subunit (GO:0000315)	50	0	5.96	-	< 0.01	0.00335	0.0331
dynein complex (GO:0030286)	55	0	6.55	-	< 0.01	0.0014	0.0158
vesicle tethering complex (GO:0099023)	46	0	5.48	-	< 0.01	0.00503	0.0464
mitochondrial large ribosomal subunit (GO:0005762)	50	0	5.96	-	< 0.01	0.00335	0.0328
RNA polymerase complex (GO:0030880)	92	0	10.96	-	< 0.01	1.36e-05	0.000271
