# Supplementary material for: Cell-type- and chromosome-specific chromatin landscapes and DNA replication programs of Drosophila testis tumor stem cell–like cells
Source: Genome Res. 2026 Jan;36(1):83–101. doi: 10.1101/gr.280809.125 (PMC12758400; doi:10.1101/gr.280809.125)
Supplement: Supplement 4 [file Supplemental_Table_S4.xlsx]

## Sheet: Legend
Occupancy Effect at TSS
Tests the null hypothesis of lack of mean enrichment of H3 (compared to silenced genes) immediately downstream of TSS of classes of genes being characterized.
	celltype	Analysis of GSC-like or CySC-like genomics
	level	Classification of gene being analyzed (by quantification)
	x	Nucleosome positioning being scored across genes (bp from TSS)
	t	t-statistic of gene class H3 score (vs the "off" class)
	p.adjust	FDR-corrected Welch's t-test p-value
	signif	Significance level of nucleosome enrichment
L2FE Effect at TSS
Tests the null hypothesis of lack of mean log-fold change of histone mark enrichment (compared to silenced genes) immediately downstream of TSS of classes of genes being characterized.
	celltype	Analysis of GSC-like or CySC-like genomics
	experiment	Histone mark Ab experiment (histone modification)
	level	Classification of gene being analyzed (by quantification)
	x	Nucleosome positioning being scored across genes (bp from TSS)
	t	t-statistic of gene class - histone mark L2FC score (vs the "off" class)
	p.adjust	FDR-corrected Welch's t-test p-value
	signif	Significance level of histone mark enrichment
Celltype Effect
Tests the null hypothesis of no differential histone mark modification broadly across gene bodies in GSC-like vs CySC-like cell types.
	experiment	Histone mark Ab experiment (histone modification)
	gene.position	Coding sequence position being tested for broad enrichment (50% = midpoint).
	t	t-statistic of gene class - histone mark L2FC score (GSC score minus CySC score)
	p.adjust	FDR-corrected Welch's t-test p-value
	signif	Significance level of histone mark enrichment
L2FE of All Transposable Elements
Tests the null hypothesis of no differential histone mark modification, transposable element-wide, in GSC-like vs CySC-like cells.
	experiment	Histone mark Ab experiment (histone modification)
	t	t-statistic of comparisons of each transposable element's L2FC enrichment (GSC minus CySC)
	p.adjust	FDR-corrected t-test p-value
	signif	Significance level of histone mark enrichment

## Sheet: Occupancy_Effect_TSS
	vs Off	Peak occupancy - TSS	Effect of L2FE
celltype	level	x	t	p.adjust	signif
Germline	low	131	29.9145	7.84402e-168	****
Germline	medium	133	47.1251	0	****
Germline	high	134	46.4618	0	****
Somatic	low	129	34.0877	4.05951e-208	****
Somatic	medium	131	42.1556	2.22108e-290	****
Somatic	high	133	38.1964	1.01891e-248	****

## Sheet: L2FE_Effect_TSS
		vs Off	Peak enrichment - TSS	Effect of L2FE
celltype	experiment	level	x	t	p.adjust	signif
Germline	H3K4me3	low	131	24.0842	1.51235e-114	****
Germline	H3K4me3	medium	132	37.3619	9.17338e-242	****
Germline	H3K4me3	high	132	40.1161	4.40068e-271	****
Germline	H3K27me3	low	133	-2.82102	0.0191832	*
Germline	H3K27me3	medium	133	-1.93393	0.159444
Germline	H3K27me3	high	-30	-1.49321	0.27082
Germline	H3K9me3	low	-14	4.36705	6.34685e-05	****
Germline	H3K9me3	medium	-10	6.51825	6.64084e-10	****
Germline	H3K9me3	high	-10	5.29048	9.92034e-07	****
Somatic	H3K4me3	low	308	9.31464	1.70417e-19	****
Somatic	H3K4me3	medium	134	10.6575	2.91388e-25	****
Somatic	H3K4me3	high	135	8.96486	3.90623e-18	****
Somatic	H3K27me3	low	483	5.23691	1.16186e-06	****
Somatic	H3K27me3	medium	487	4.54639	3.30555e-05	****
Somatic	H3K27me3	high	490	-0.933562	0.350548
Somatic	H3K9me3	low	-13	-8.74327	3.56351e-17	****
Somatic	H3K9me3	medium	-14	-9.55787	2.98026e-20	****
Somatic	H3K9me3	high	-16	-11.7005	8.18474e-30	****

## Sheet: Celltype_Effect
	% Along CDS with CPM >= 5	Germline minus Somatic
experiment	gene.position	t	p.adjust	signif
H3K4me3	0.5	0.1047	0.916617
H3K27me3	0.5	-20.048	2.39e-87	****

## Sheet: L2FE_All_TE
	Germline minus Somatic
experiment	t	p.adjust	signif
H3K4me3	3.50435	0.00129544	**
H3K27me3	-2.4015	0.0178891	*
H3K9me3	8.55444	1.52e-13	****
