# Supplementary material for: Cell-type- and chromosome-specific chromatin landscapes and DNA replication programs of Drosophila testis tumor stem cell–like cells
Source: Genome Res. 2026 Jan;36(1):83–101. doi: 10.1101/gr.280809.125 (PMC12758400; doi:10.1101/gr.280809.125)
Supplement: Supplement 5 [file Supplemental_Table_S5.xlsx]

## Sheet: Legend
Average DNA Replication Regime Characterization
	Region	Portion of the dm6 genome being characterized in bulk genomics. Chromosmes 2 and 3 are divided empirically at the pericentromere, and the dm6 centric region sequences ("scaffolds") are also summarized. The sex chromosomes are each characterized as a whole, and the rDNA coding regions are also specifically summarized.
	Early Score	Average of the logit-transformed replication timing. Chromatin is scored from earliest-replicating (+ direction) to latest-replicating (- direction).
	t.statistic	Testing of GSC (+) vs CySC (-) differentially early replication.
	p.adjust	FDR-corrected t-test p-value.
	signif	Significance level of broad replication choreography difference.
Timed Average Chromatin (Repli-seq - ChIC-ChIP) Selected Comparisons
	Region	Includes selected dm6 reference sequence regions as well as a genome-wide statistical test.
	L2FC (GSC Timed > CySC)	Characterization of ChIC-ChIP L2FC (GSC vs CySC) where GSC-like chromatin replicates differentially early.
	L2FC (GSC Timed < CySC)	Characterization of ChIC-ChIP L2FC (GSC vs CySC) where CySC-like chromatin replicates differentially early.
	GSC	Histone mark L2FC enrichment score (median GSC-like autosome normalized coefficient).
	CySC	Histone mark L2FC enrichment score (median CySC-like autosome normalized coefficient).
	t.statistic	Test statistic of GSC vs CySC differential histone mark enrichment.
	signif	Significance level (FDR-corrected) of chromatin landscape difference of GSC vs CySC in the windows where replication timing is significantly biased.

## Sheet: Average_Repliseq
	Early Score (Logistic Coefficient, Inf to -Inf)				GSC - CySC T Test
Region	GSC	CySC	Kc167	S2	t.statistic	p.adjust	signif
2L - Arm	0.240004	-0.0251171	0.134634	0.111173	7.67	1.86279e-13	****
2L - PC	-0.22118	-1.2908	-0.594244	-0.906171	9.95	1.95418e-18	****
2CenScaffold	-1.94433	-0.489286	-2.68608	-1.40808	-6.6	0.190597
2R - PC	-0.763777	-1.06684	-1.55509	-1.09113	4.92	5.09064e-06	****
2R - Arm	0.586178	0.339229	0.760754	0.336881	7.45	8.88835e-13	****
3L - Arm	0.34435	0.2074	0.512648	0.181512	4.1	0.000165784	***
3L - PC	-0.855532	-1.32626	-1.75411	-0.980452	8.84	8.0252e-17	****
3CenScaffold	-1.96664	-0.502457	-2.76395	-1.53089	-9.59	0.000278654	***
3R - PC	-1.42885	-0.911969	-3.56734	-1.85825	-9.43	9.22424e-19	****
3R - Arm	0.425791	1.67109e-05	0.306256	0.176125	13.51	8.73538e-40	****
4	1.44057	0.660503	1.6279	0.380988	10.21	1.02413e-19	****
X	0.479818	0.485224	0.351674	0.481225	-0.18	0.855151
Y	-0.91487	-0.563614		-0.765658	-5.85	5.93179e-08	****
rDNA	1.72585	-1.36112	-3.38544	-3.03629	38.15	3.12989e-06	****

## Sheet: Timed_Average_Chromatin
H3K4me3	L2FE (GSC Timed > CySC)		T-Test	Test Result (Only |Effect| >= 0.1)		L2FE (GSC Timed < CySC)		T-Test	Test Result (Only |Effect| >= 0.1)
Region	GSC	CySC	t.statistic	signif	.	GSC.later	CySC.earlier	t.statistic.later	signif.later
Whole Genome	-0.0795363	-0.165917	14.7908	****		-0.0329746	0.181936	-38.3784	****
2L - PC	-0.329574	-0.372645	0.537288
4	-0.498325	-0.249528	-3.34221	*
X	-0.117567	-0.131472	0.692318			-0.120336	0.176462	-13.1445	****
Y	-1.00666	0.296683	-2.66778			-0.821803	-0.448993	-2.24876
H3K27me3	L2FE (GSC Timed > CySC)		T-Test	Test Result (Only |Effect| >= 0.1)		L2FE (GSC Timed < CySC)		T-Test	Test Result (Only |Effect| >= 0.1)
Region	GSC	CySC	t.statistic	signif	.	GSC.later	CySC.earlier	t.statistic.later	signif.later
Whole Genome	-0.0569421	-0.129029	13.518	****		0.00122525	0.158064	-29.834	****
2L - PC	-0.292136	-0.354527	0.897574
4	-0.893539	-0.382596	-10.6155	****
X	-0.0883741	-0.0773566	-0.64784			-0.108499	0.16385	-13.4721	****
Y	0.306452	-0.517397	1.86941			-0.76643	-0.406356	-2.52877
H3K9me3	L2FE (GSC Timed > CySC)		T-Test	Test Result (Only |Effect| >= 0.1)		L2FE (GSC Timed < CySC)		T-Test	Test Result (Only |Effect| >= 0.1)
Region	GSC	CySC	t.statistic	signif	.	GSC.later	CySC.earlier	t.statistic.later	signif.later
Whole Genome	0.0428087	0.000425929	9.46719	****		0.0943677	0.104756	-2.18134
2L - PC	0.0818644	-0.0822164	2.63989
4	-0.108299	-0.238235	9.5003	****
X	0.137342	0.0333228	6.93751	****		0.243143	0.195602	2.52358
Y	-0.123851	-0.706108	1.44981			0.0143846	-0.0368519	0.45688
