# Supplementary material for: Cell-type- and chromosome-specific chromatin landscapes and DNA replication programs of Drosophila testis tumor stem cell–like cells
Source: Genome Res. 2026 Jan;36(1):83–101. doi: 10.1101/gr.280809.125 (PMC12758400; doi:10.1101/gr.280809.125)
Supplement: Supplement 6 [file Supplemental_Table_S6.xlsx]

## Sheet: Legend
Bar Chart Analysis of Differential Replication Program
Shown is the quantification (summing the width of broad peak regions) of differentially replicated chromatin by region.
	Region	Portion of the dm6 genome being characterized in bulk genomics. Chromosmes 2 and 3 are divided empirically at the pericentromere, and the dm6 centric region sequences ("scaffolds") are also summarized. The sex chromosomes are each characterized as a whole, and the rDNA coding regions are also specifically summarized.
	GSC vs CySC in kb	Sum of width of broad peaks with exact test significance of GSC-like vs CySC-like differentially early chromatin.
	GSC Earlier %	Sum of width of broad peaks normalized to region size.
	CySC Earlier %
	GSC Earlier	Post-hoc test of enrichment of GSC-like differentially early chromatin in the region normalized to the genome-wide differential peak calling results.
	CySC Earlier	Post-hoc test of enrichment of CySC-like differentially early chromatin in the region normalized to the genome-wide differential peak calling results.

## Sheet: Bar_Chart_Data
	GSC vs CySC in kb (****)		GSC Earlier %	CySC Earlier %	GSC Earlier	CySC Earlier	GSC vs Kc167 in kb (****)		GSC Earlier %	Kc167 Earlier %	GSC Earlier	Kc167 Earlier	GSC vs S2 in kb (**)		GSC Earlier %	S2 Earlier %	GSC Earlier	S2 Earlier	CySC vs Kc167 in kb (****)		CySC Earlier %	Kc167 Earlier %	CySC Earlier	Kc167 Earlier	CySC vs S2 in kb (****)		CySC Earlier %	S2 Earlier %	CySC Earlier	S2 Earlier	Kc167 vs S2 in kb (****)		Kc167 Earlier %	S2 Earlier %	Kc167 Earlier	S2 Earlier
2L - Arm	5036	3267	0.2269	0.1472			6384	4540	0.2877	0.2046			4264	4655	0.1921	0.2098			4188	3265	0.1887	0.1471			3323	4555	0.1497	0.2053			4743	6665	0.2137	0.3003
2L - PC	796	0	0.6026	0	*		384	159	0.2907	0.1204			358	400	0.271	0.3028			0	577	0	0.4368		**	41	64	0.031	0.0484			486	82	0.3679	0.0621
2R - PC	1447	39	0.2561	0.0069	**		1581	756	0.2798	0.1338			935	723	0.1655	0.1279			0	1739	0	0.3077		****	83	1112	0.0147	0.1968		*	1567	1146	0.2773	0.2028
2R - Arm	3124	2518	0.1591	0.1282			4195	3991	0.2136	0.2032		*	4220	3502	0.2149	0.1783			2426	3786	0.1235	0.1928			2268	2879	0.1155	0.1466			5420	3745	0.276	0.1907	***
3L - Arm	4260	3806	0.184	0.1644			7058	4615	0.3048	0.1993			4477	4012	0.1934	0.1733			4193	3365	0.1811	0.1453			4263	4082	0.1841	0.1763			6221	5698	0.2687	0.2461
3L - PC	1313	0	0.2649	0	***		1768	829	0.3567	0.1673			686	669	0.1384	0.135			0	871	0	0.1757		***	0	719	0	0.1451		*	213	1605	0.043	0.3238		**
3R - PC	206	49	0.0487	0.0116			1443	566	0.3412	0.1338			777	381	0.1837	0.0901			551	276	0.1303	0.0653			203	97	0.048	0.0229			114	189	0.027	0.0447
3R - Arm	6407	2692	0.2301	0.0967			9069	4197	0.3256	0.1507			6892	4889	0.2475	0.1755			3333	4065	0.1197	0.146			3550	6267	0.1275	0.225			5933	6558	0.213	0.2355
4	258	0	0.1914	0			240	0	0.178	0			596	105	0.4421	0.0779			116	242	0.0861	0.1795			239	0	0.1773	0			898	110	0.6662	0.0816	**
X	2222	2008	0.0944	0.0853			8244	2313	0.3502	0.0982	***		1455	2855	0.0618	0.1213		*	6224	1780	0.2644	0.0756	****		2243	2382	0.0953	0.1012			1964	9248	0.0834	0.3928		****
Y	51	209	0.0139	0.057			1148	974	0.3131	0.2656			376	520	0.1025	0.1418			395	230	0.1077	0.0627			117	144	0.0319	0.0393			144	822	0.0393	0.2242
