# Supplementary material for: Cell-type- and chromosome-specific chromatin landscapes and DNA replication programs of Drosophila testis tumor stem cell–like cells
Source: Genome Res. 2026 Jan;36(1):83–101. doi: 10.1101/gr.280809.125 (PMC12758400; doi:10.1101/gr.280809.125)
Supplement: Supplement 7 [file Supplemental_Table_S7.xlsx]

## Sheet: Legend
Average Chromatin Landscape Characterization
	Region	Portion of the dm6 genome being characterized in bulk genomics. Chromosmes 2 and 3 are divided empirically at the pericentromere, and the dm6 centric region sequences ("scaffolds") are also summarized. The sex chromosomes are each characterized as a whole, and the rDNA coding regions are also specifically summarized.
	L2FE	ChIC-ChIP average regression coefficient of histone mark enrichment (GSC-like, CySC-like).
	T-Test	Testing of differential histone mark enrichment in GSC-like vs CySC-like.
	Test Result	Test significance of the t-test (further filtering of effect size: |GSC_L2FC - CySC_L2FC| >= 0.1 is also applied before reporting).
	Integrated L2FE	Transformed microarray histone mark enrichment summary data placed on a comparable standard normal scale to the ChIC-ChIP experiment.
Cell Type Specific Chromatin Test
	Region	Portion of the dm6 genome.
	GSC-Specific %	Abundance of "Quadrant IV" chromatin (as seen in Fig. S7: GSC-like enriched for histone mark and CySC-like depleted for histone mark).
	CySC-Specific %	Abundance of "Quadrant II" chromatin (as seen in Fig. S7: GSC-like depleted for histone mark and CySC-like enriched for histone mark).
	Signif Specific	Permutation test of "GSC-Specific" vs "CySC-Specific" chromatin classifications. Tests the null hypothesis of no average shift towards cell-type-specific histone mark enrichment.

## Sheet: Average_Chromatin
H3K4me3	L2FE		T-Test	Test Result (Only |Effect| >= 0.1)		Integrated L2FE
Region	GSC	CySC	t.statistic	signif		Kc167	S2
2L - Arm	-0.03	0.03	-10.8053			0	-0.05
2L - PC	-0.32	-0.35	0.531107			-0.19	-0.23
2CenScaffold	-0.56	-0.1	-1.98327
2R - PC	-0.48	-0.31	-7.13325	****		-0.13	-0.16
2R - Arm	0.1	0.14	-5.62427			0.1	0.11
3L - Arm	-0.01	0.07	-16.702			0.04	0.07
3L - PC	-0.64	-0.3	-10.028	****		-0.15	-0.13
3CenScaffold	0.46	0.14	0.692825
3R - PC	-0.61	-0.15	-13.4354	****		-0.32	-0.16
3R - Arm	0.04	0.05	-3.48065			-0.01	-0.01
4	-0.57	-0.23	-12.9554	****		0.29	0.33
X	-0.05	0.19	-30.8516	****		0.07	0.42
Y	-0.87	-0.06	-17.1686	****			0.02
rDNA	0.15	0.04	0.0130887
H3K27me3	L2FE		T-Test (|Effect| >= 0.1)			Integrated L2FE
Region	GSC	CySC	t.statistic	signif		Kc167	S2
2L - Arm	-0.05	0.01	-12.1201			0.03	0.04
2L - PC	-0.36	-0.31	-0.22319			-0.37	-0.4
2CenScaffold	-0.5	-0.32	-2.50981
2R - PC	-0.36	-0.4	2.24147			-0.49	-0.32
2R - Arm	0.06	0.07	-0.928144			0.13	0.06
3L - Arm	-0.05	0.02	-13.9229			0	0
3L - PC	-0.46	-0.42	-1.01881			-0.37	-0.24
3CenScaffold	0.2	0.23	-0.0771624
3R - PC	-0.42	-0.3	-3.78825	**		-0.45	-0.18
3R - Arm	0.02	0.02	0.150748			0.15	0.13
4	-0.92	-0.41	-18.4244	****		-0.36	-0.88
X	-0.12	0.09	-27.525	****		0.05	0.06
Y	-0.53	-0.27	-5.66984	****			-0.08
rDNA	0.23	0.11	0.369526
H3K9me3	L2FE		T-Test (|Effect| >= 0.1)			Integrated L2FE
Region	GSC	CySC	t.statistic	signif		Kc167	S2
2L - Arm	-0.01	-0.02	0.0035684			-0.11	-0.13
2L - PC	0.07	-0.05	3.14279	*		0.37	0.68
2CenScaffold	0.37	0.32	0.31091
2R - PC	0.16	0.08	4.09952			0.63	0.58
2R - Arm	-0.01	0	-0.842904			-0.06	-0.01
3L - Arm	-0.02	-0.02	0.368892			-0.09	-0.09
3L - PC	0.08	0.09	0.620341			0.53	0.54
3CenScaffold	0.52	0.71	-1.04711
3R - PC	0.14	0.15	-0.273591			0.5	0.43
3R - Arm	-0.01	0	-4.82387			-0.15	-0.18
4	-0.1	-0.17	2.58684			1.01	1.14
X	0.09	0.06	5.44411			0.02	0.36
Y	0.09	0.11	-1.54281				0.18
rDNA	0.23	0.62	-0.928507

## Sheet: Cell_Type_Specific_Chromatin
H3K4me3	% of Region
Region	GSC-Specific	CySC-Specific	Signif Specific
2L - Arm	0.035	0.041	****
2L - PC	0.074	0.032	****
2CenScaffold	0	0
2R - PC	0.054	0.033	****
2R - Arm	0.037	0.035
3L - Arm	0.032	0.044	****
3L - PC	0.059	0.04	****
3CenScaffold	0	0
3R - PC	0.042	0.064	****
3R - Arm	0.041	0.036	****
4	0.008	0.057	****
X	0.037	0.083	****
Y	0.042	0.081	****
rDNA	0.006	0.05
H3K27me3	% Score from Heatmap
Region	GSC-Specific	CySC-Specific	Signif Specific
2L - Arm	0.036	0.027	****
2L - PC	0.046	0.02	****
2CenScaffold	0	0
2R - PC	0.06	0.026	****
2R - Arm	0.048	0.021	****
3L - Arm	0.037	0.028	****
3L - PC	0.055	0.028	****
3CenScaffold	0	0
3R - PC	0.053	0.04	***
3R - Arm	0.048	0.021	****
4	0.005	0.044	****
X	0.041	0.069	****
Y	0.047	0.062	***
rDNA	0	0
H3K9me3	% Score from Heatmap
Region	GSC-Specific	CySC-Specific	Signif Specific
2L - Arm	0.023	0.023
2L - PC	0.043	0.02	****
2CenScaffold	0	0
2R - PC	0.044	0.02	****
2R - Arm	0.023	0.028	****
3L - Arm	0.023	0.024
3L - PC	0.042	0.027	****
3CenScaffold	0	0
3R - PC	0.042	0.029	****
3R - Arm	0.019	0.027	****
4	0.022	0.018
X	0.051	0.035	****
Y	0.049	0.038	**
rDNA	0.006	0
