# Supplementary figures and images for: Cell-type- and chromosome-specific chromatin landscapes and DNA replication programs of Drosophila testis tumor stem cell–like cells
Source: HighWire-hosted journal article supplement (doi:10.1101/gr.280809.125), 2025-12-10

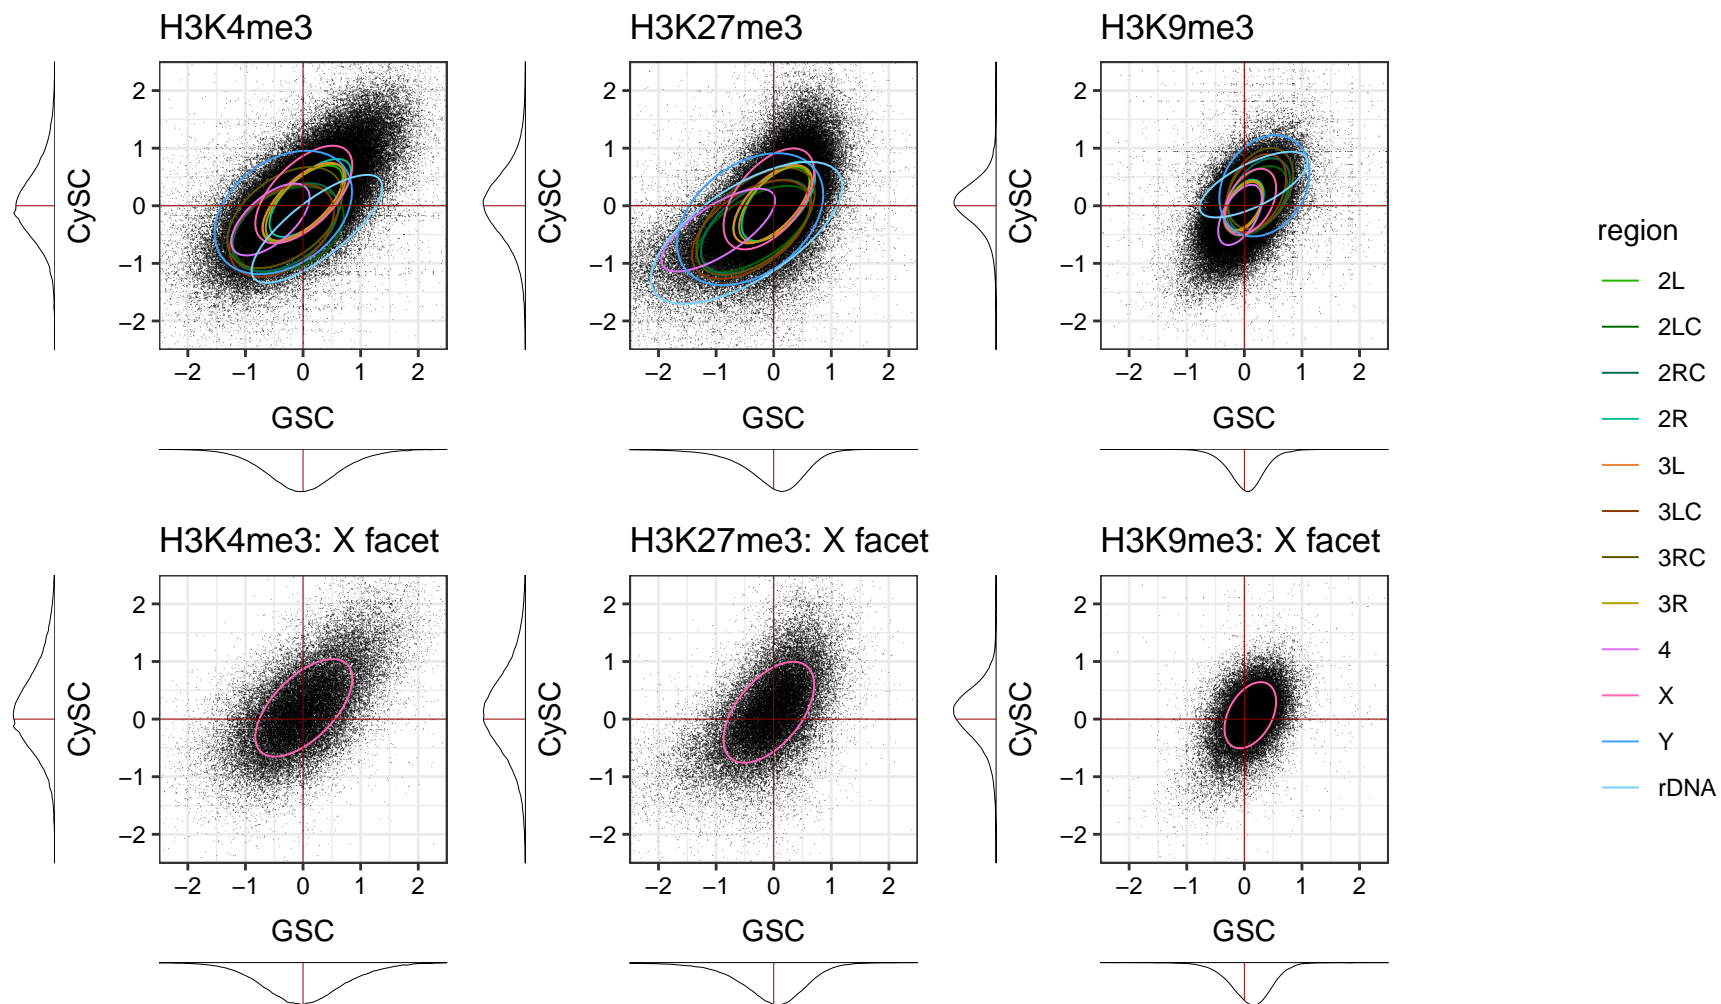

Supplement: Supplemental_Code.zip [file ChromatinCellTypeScatter.pdf › Upd-Germline-Genomics-main/illustrations/ChromatinCellTypeScatter.pdf]

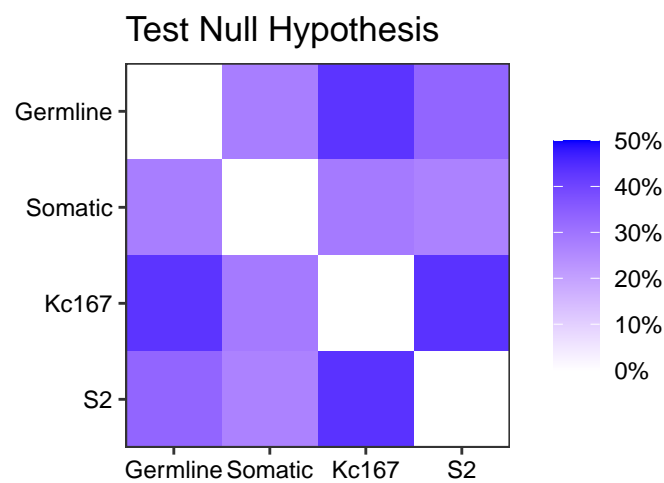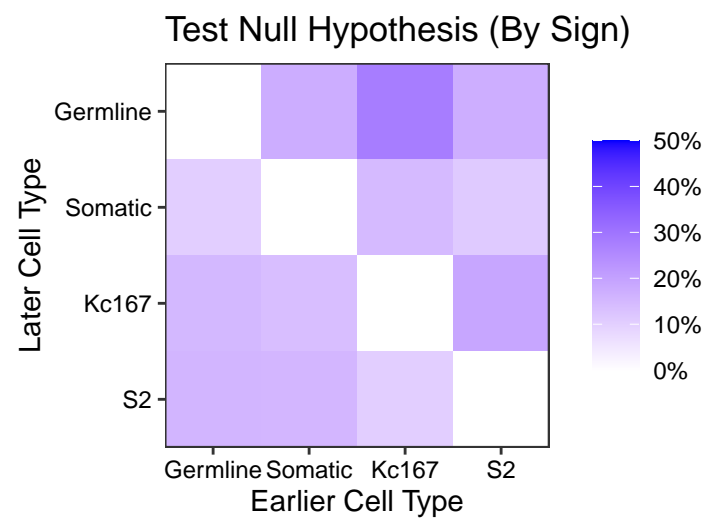

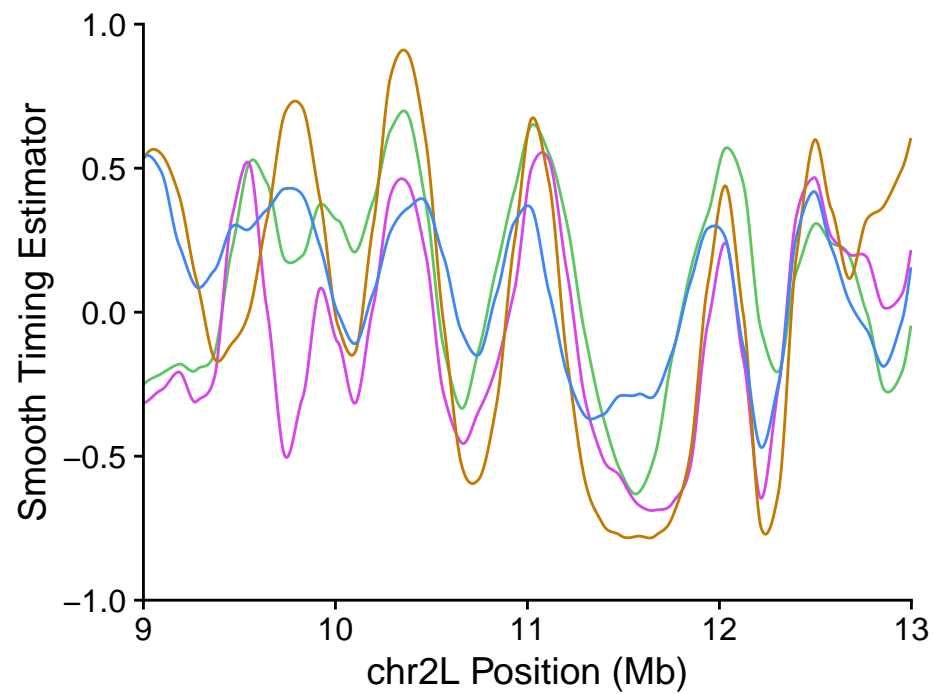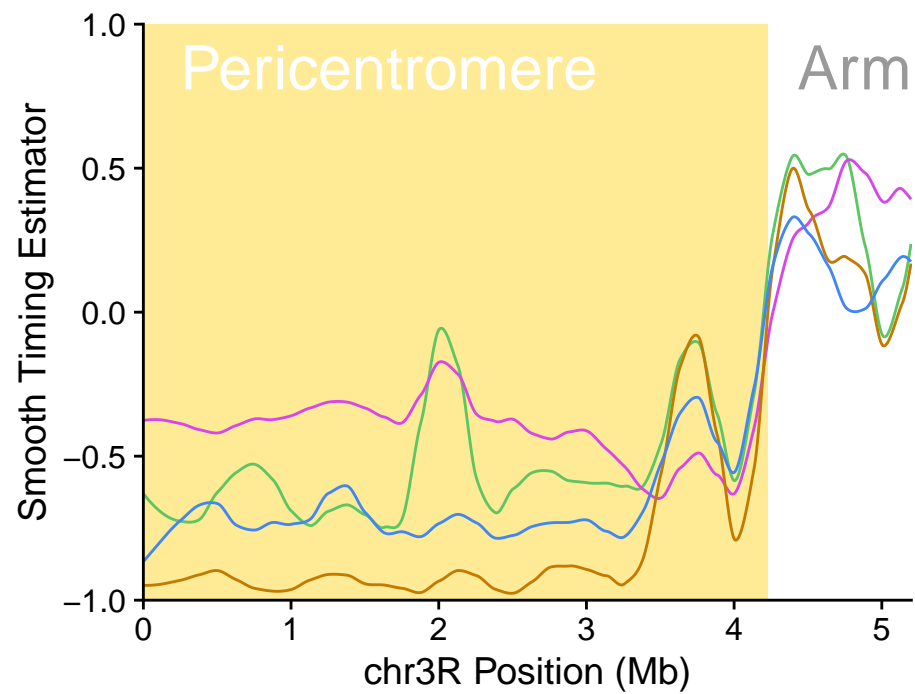

## Cluster Dendrogram

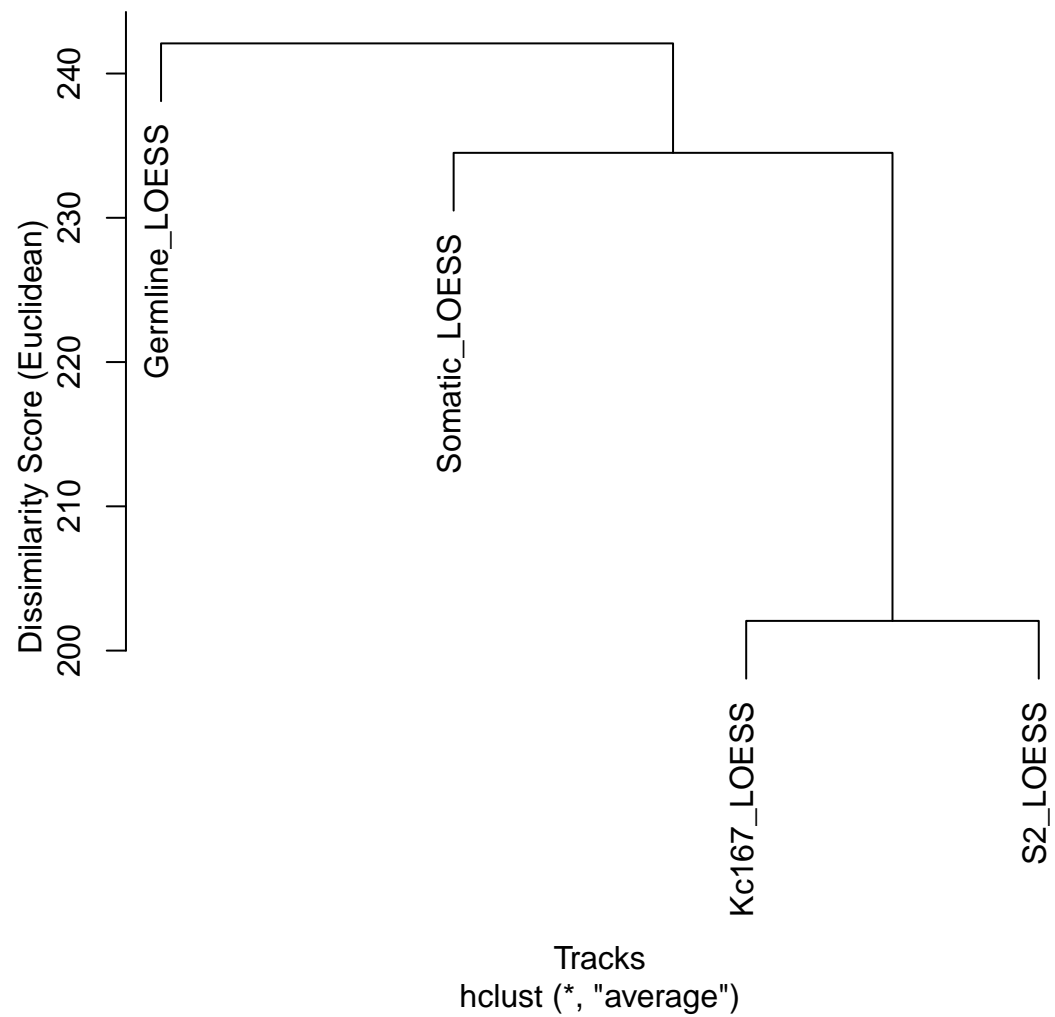

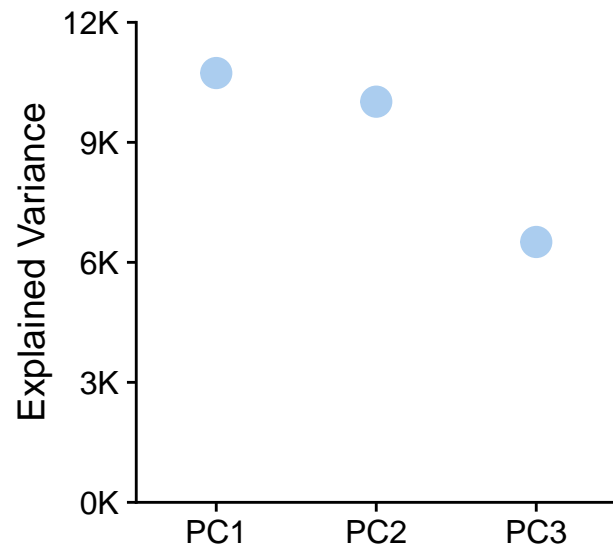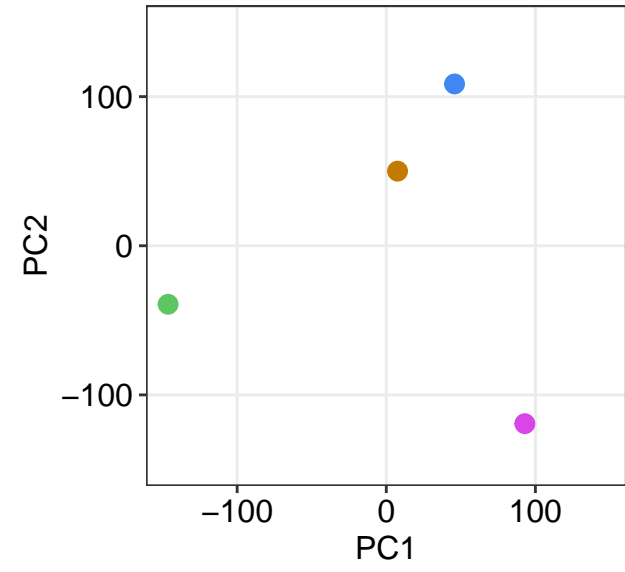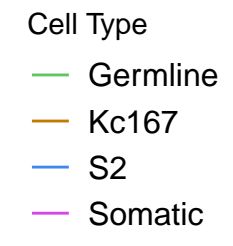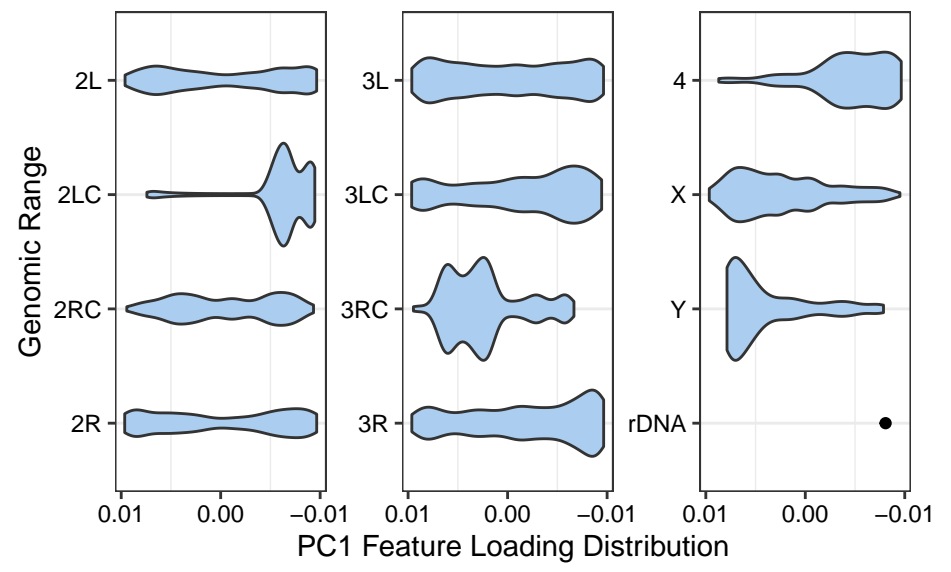

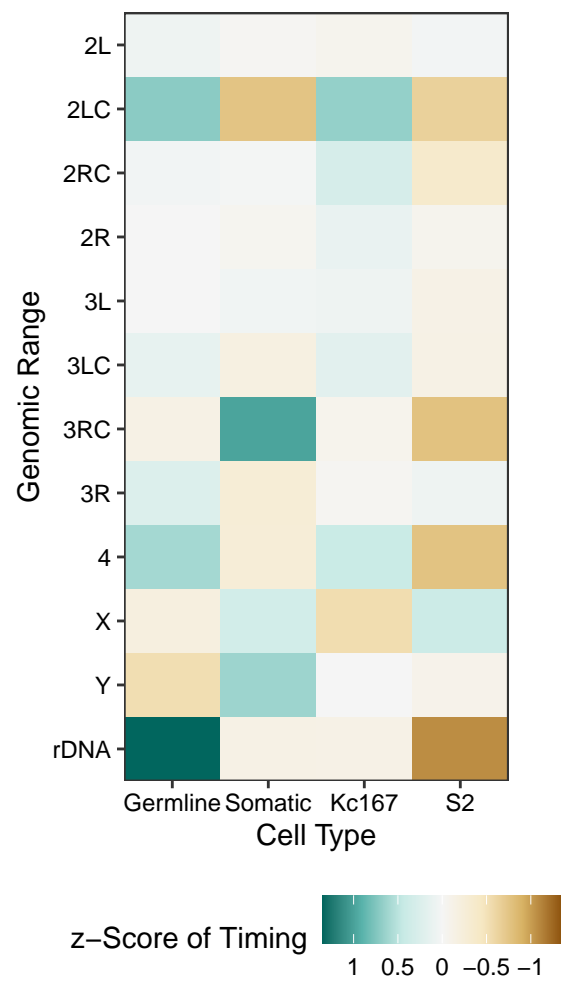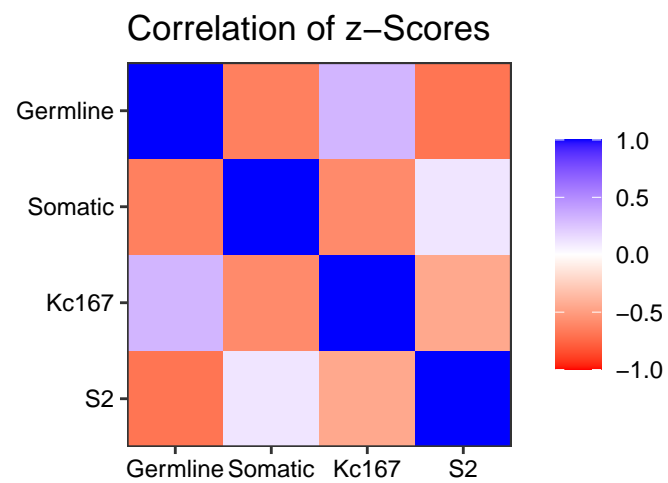

Supplement: Supplemental_Code.zip [file Fig6Panels.pdf › Upd-Germline-Genomics-main/illustrations/Fig6Panels.pdf]
